# Supplementary material for: Towards a Cardoon (Cynara cardunculus var. altilis)-Based Biorefinery: A Case Study of Improved Cell Cultures via Genetic Modulation of the Phenylpropanoid Pathway
Source: MDPI journal article supplement (doi:10.3390/ijms222111978), 2021-11-05
Supplement: s1 [file s1]

| Enzyme / E.C.      | Gene                      | log <sub>2</sub> FC L1 vs. WT | log <sub>2</sub> FC L18 vs. WT | log <sub>2</sub> FC L24 vs. WT |
|--------------------|---------------------------|-------------------------------|--------------------------------|--------------------------------|
| SAD / 1.14.19.2 -  | <i>Ccrd_026332</i>        | 3.29                          | <i>n.s.</i>                    | 2.49                           |
| 1.14.19.11 -       | <i>Ccrd_010691</i>        | <i>n.s.</i>                   | <i>n.s.</i>                    | <i>n.s.</i>                    |
| 1.14.19.26         | <i>Ccrd_010683</i>        | 7.31                          | <i>n.s.</i>                    | <i>n.s.</i>                    |
| FAD2 / 1.14.19.6 - | <u><i>Ccrd_009539</i></u> | 1.33                          | 1.82                           | 2.31                           |
| 1.14.19.22         | <i>Ccrd_009540</i>        | -1.53                         | <i>n.s.</i>                    | <i>n.s.</i>                    |
|                    | <i>Ccrd_009531</i>        | <i>n.s.</i>                   | -1.44                          | -1.23                          |
|                    | <i>Ccrd_009529</i>        | <i>n.s.</i>                   | <i>n.s.</i>                    | 1.56                           |
|                    | <i>Ccrd_009530</i>        | 2.89                          | <i>n.s.</i>                    | 2.81                           |
|                    | <i>Ccrd_009537</i>        | -0.91                         | <i>n.s.</i>                    | 1.23                           |
|                    | <i>Ccrd_009538</i>        | <i>n.s.</i>                   | 1.25                           | 1.70                           |
|                    | <i>Ccrd_018182</i>        | 2.02                          | 0.81                           | 0.84                           |
|                    | <i>Ccrd_012184</i>        | -2.18                         | 1.22                           | <i>n.s.</i>                    |
|                    | <i>Ccrd_007560</i>        | 1.32                          | 0.96                           | 2.18                           |
|                    | <i>Ccrd_007559</i>        | <i>n.s.</i>                   | 1.38                           | 1.81                           |
|                    | <i>Ccrd_007557</i>        | <i>n.s.</i>                   | <i>n.s.</i>                    | 1.77                           |
|                    | <i>Ccrd_007558</i>        | <i>n.s.</i>                   | 1.76                           | 2.43                           |
|                    | <i>Ccrd_017320</i>        | <i>n.s.</i>                   | <i>n.s.</i>                    | 2.49                           |
|                    | <i>Ccrd_002833</i>        | -1.79                         | 0.98                           | 1.82                           |
|                    | <i>Ccrd_002832</i>        | 3.29                          | <i>n.s.</i>                    | 2.49                           |
|                    | <i>Ccrd_002834</i>        | <i>n.s.</i>                   | <i>n.s.</i>                    | <i>n.s.</i>                    |
|                    | <u><i>Ccrd_002831</i></u> | 2.30                          | 1.37                           | 2.52                           |
|                    | <u><i>Ccrd_002830</i></u> | 1.32                          | 2.04                           | 3.08                           |

**Supporting Table S5: Expression levels of the genes encoding SAD and FAD2 activities involved in the biosynthesis of oleic acid.** For each enzymatic step, differentially expressed genes (DEGs, FDR<0.05) between *AtMYB4oe* lines vs. WT are listed. Underlining indicates core-DEGs. *n.s.* = not significant.
