# Supplementary material for: Towards a Cardoon (Cynara cardunculus var. altilis)-Based Biorefinery: A Case Study of Improved Cell Cultures via Genetic Modulation of the Phenylpropanoid Pathway
Source: MDPI journal article supplement (doi:10.3390/ijms222111978), 2021-11-05
Supplement: s1 [file s1]

**Gateway cloning of *AtMYB4* CDS**

|               |     |                                                            |
|---------------|-----|------------------------------------------------------------|
| <i>AtMYB4</i> | fw  | GGGGACAAGTTTGTACAAAAAAGCAGGCTTAATGGGAAGGTCACCGTGC          |
|               | rev | GGGGACCACTTTGTACAAGAAAGCTGGGTTTTATTTTCATCTCCAAGCTTCGAAAGCC |

**Selection of transgenic lines and expression analysis of *AtMYB4***

|               |     |                      |
|---------------|-----|----------------------|
| <i>AtMYB4</i> | fw  | GCAAGGGGAGTGACATGAGC |
|               | rev | CTCCAAGCTTCGAAAGCCCA |

**Checking Agrobacterium residual contamination of resistant calluses**

|              |     |                            |
|--------------|-----|----------------------------|
| <i>virD2</i> | fw  | ATGCCCCGATCGAGCTCAAGT      |
|              | rev | CCTGACCCAAACATCTCGGCTGCCCA |

**Expression analyses**

|                          |     |                               |
|--------------------------|-----|-------------------------------|
| <i>Ccrd_012208/ELF1a</i> | fw  | TCCCAGGCTGATTGTGCTGTCCTTATTAT |
|                          | rev | ATGCTCACGGGTCTGACCATCCTTA     |

|                              |     |                       |
|------------------------------|-----|-----------------------|
| <i>Ccrd_013113/ACT7-like</i> | fw  | GGCGTCCTTCTTCTCCGAGAT |
|                              | rev | CATCACCAGCAAACCCAGCC  |

|                        |     |                      |
|------------------------|-----|----------------------|
| <i>Ccrd_012103/PAL</i> | fw  | GGGTGATGGAGAGCATGAGC |
|                        | rev | GTGCCGTTGCCAAAGATTCC |

|                          |     |                        |
|--------------------------|-----|------------------------|
| <i>Ccrd_010165 / C4H</i> | fw  | TCATCCCAATTTTGAGGCCGT  |
|                          | rev | CCATGCTTTTTGTGCTTCCCAT |

|                          |     |                      |
|--------------------------|-----|----------------------|
| <i>Ccrd_015556 / 4CL</i> | fw  | TTCAAGTAGCACCAGCCGAG |
|                          | rev | ATGCAACTGGAACCTCTCCG |

|                          |     |                      |
|--------------------------|-----|----------------------|
| <i>Ccrd_015561 / HCT</i> | fw  | GAGCTCCGGAAACTCATCCC |
|                          | rev | TTGCATCCCAACTCCCACTG |

|                              |     |                      |
|------------------------------|-----|----------------------|
| <i>Ccrd_004659 / CCoAOMT</i> | fw  | AAACGAGCGTGTATCCGAGG |
|                              | rev | GTCCTTCATCTGCCGACGTT |

|                                          |     |                      |
|------------------------------------------|-----|----------------------|
| <i>Ccrd_024577 / NADPH dehydrogenase</i> | fw  | AATTGGGATAGCGCCGTCT  |
|                                          | rev | GGAAGCTTTGCGAAGGGAAC |

|                                                 |     |                      |
|-------------------------------------------------|-----|----------------------|
| <i>Ccrd_000418 / xyloglucan endoglucosylase</i> | fw  | GCCGGAGCCAATCAGTATCT |
|                                                 | rev | AGATGAAGCAATTTGCCCCA |

|                                |     |                        |
|--------------------------------|-----|------------------------|
| <i>Ccrd_010818 / KRP7-like</i> | fw  | ACTTCACCTCACCGTTAGAAGC |
|                                | rev | TGCAAGGAGTTTCCGCAGTT   |

|                              |     |                          |
|------------------------------|-----|--------------------------|
| <i>Ccrd_019107 / MADS-TF</i> | fw  | TGAAACAACCACCTCAAACCTCAC |
|                              | rev | GCTGGTACTCACGGGTTGAA     |

|                             |     |                       |
|-----------------------------|-----|-----------------------|
| <i>Ccrd_016332 / AP2-TF</i> | fw  | CCGACACACTAGCTTAGCACA |
|                             | rev | ATTGCAACCACACAACCCTTT |

**Supporting Table S6 – Primers used in this study.**
