# Supplementary material for: Towards a Cardoon (Cynara cardunculus var. altilis)-Based Biorefinery: A Case Study of Improved Cell Cultures via Genetic Modulation of the Phenylpropanoid Pathway
Source: MDPI journal article supplement (doi:10.3390/ijms222111978), 2021-11-05
Supplement: s1 [file s1]

| Sample | Input-reads | Unique            | Multi          | Unmapped       | Mismatch-ratio | Assigned          |
|--------|-------------|-------------------|----------------|----------------|----------------|-------------------|
| WT-1   | 16584326    | 15752067 (94.98%) | 360469 (2.17%) | 471790 (2.84%) | 0.31%          | 14216737 (85.72%) |
| WT-2   | 18019521    | 17073937 (94.75%) | 376466 (2.08%) | 569118 (3.16%) | 0.30%          | 15515203 (86.10%) |
| WT-3   | 15934457    | 15175361 (95.23%) | 326936 (2.05%) | 432160 (2.71%) | 0.30%          | 13807280 (86.65%) |
| L1-1   | 18391077    | 17361125 (94.40%) | 450653 (2.45%) | 579299 (3.15%) | 0.31%          | 15628377 (84.98%) |
| L1-2   | 22792884    | 21547756 (94.54%) | 547395 (2.40%) | 697733 (3.06%) | 0.30%          | 19509803 (85.60%) |
| L1-3   | 15190479    | 14299706 (94.14%) | 419490 (2.76%) | 471283 (3.10%) | 0.31%          | 12736208 (83.84%) |
| L18-1  | 19349701    | 18350939 (94.84%) | 447891 (2.31%) | 550871 (2.85%) | 0.30%          | 16543902 (85.49%) |
| L18-2  | 17394420    | 16502550 (94.87%) | 416575 (2.39%) | 475295 (2.73%) | 0.30%          | 14903994 (85.68%) |
| L18-3  | 17483375    | 16624061 (95.08%) | 386295 (2.21%) | 473019 (2.70%) | 0.29%          | 15125622 (86.51%) |
| L24-1  | 17761246    | 16774591 (94.44%) | 426677 (2.40%) | 559978 (3.15%) | 0.32%          | 14895765 (83.87%) |
| L24-2  | 14924673    | 14115540 (94.58%) | 357396 (2.39%) | 451737 (3.03%) | 0.32%          | 12505275 (83.79%) |
| L24-3  | 15477585    | 14573702 (94.16%) | 378478 (2.44%) | 525405 (3.39%) | 0.33%          | 12784203 (82.60%) |

**Supporting Table S1: Mapping statistics of RNA-seq dataset.**
