# Supplementary material for: Towards a Cardoon (Cynara cardunculus var. altilis)-Based Biorefinery: A Case Study of Improved Cell Cultures via Genetic Modulation of the Phenylpropanoid Pathway
Source: MDPI journal article supplement (doi:10.3390/ijms222111978), 2021-11-05
Supplement: s1 [file s1]

| Enzyme / E.C.       | Gene               | log <sub>2</sub> FC L1 vs. WT | log <sub>2</sub> FC L18 vs. WT | log <sub>2</sub> FC L24 vs. WT |
|---------------------|--------------------|-------------------------------|--------------------------------|--------------------------------|
| PAL / 4.3.1.24      | <u>Ccrd_007512</u> | -2,11                         | -0,96                          | -1,67                          |
|                     | <u>Ccrd_014855</u> | -6,26                         | -3,28                          | -4,19                          |
| C4H / 1.14.14.91    | <u>Ccrd_003800</u> | -1,02                         | -0,78                          | -0,85                          |
|                     | <u>Ccrd_010165</u> | -2,55                         | -2,05                          | -2,41                          |
| 4CL / 6.2.1.12      | <u>Ccrd_015445</u> | n.s.                          | -0,49                          | -1,18                          |
|                     | <u>Ccrd_015556</u> | -1,61                         | -2,09                          | -2,03                          |
|                     | <u>Ccrd_022733</u> | -4,39                         | -2,94                          | -4,50                          |
|                     | <u>Ccrd_023896</u> | n.s.                          | n.s.                           | 1,35                           |
| HCT / 2.3.1.133     | <u>Ccrd_004326</u> | -0,69                         | n.s.                           | -1,10                          |
|                     | <u>Ccrd_004546</u> | 1,22                          | n.s.                           | 0,67                           |
|                     | <u>Ccrd_009712</u> | n.s.                          | 2,20                           | n.s.                           |
|                     | <u>Ccrd_009859</u> | -3,96                         | -1,30                          | -2,80                          |
|                     | <u>Ccrd_015561</u> | -4,82                         | -3,93                          | -4,89                          |
|                     | <u>Ccrd_022724</u> | -0,59                         | n.s.                           | n.s.                           |
| C3'H / 1.14.14.96   | <u>Ccrd_018265</u> | -0,82                         | -1,41                          | -1,53                          |
|                     | <u>Ccrd_025643</u> | -2,88                         | -2,04                          | -2,66                          |
| HQT / 2.3.1.99      | <u>Ccrd_025215</u> | 0,71                          | 1,01                           | 1,58                           |
| CCR / 1.2.1.44      | <u>Ccrd_015577</u> | -1,98                         | -2,22                          | -2,10                          |
| CCoaOMT / 2.1.1.104 | <u>Ccrd_004659</u> | -6,66                         | -4,92                          | -8,00                          |
|                     | <u>Ccrd_012615</u> | -1,73                         | -1,65                          | -1,04                          |
|                     | <u>Ccrd_012620</u> | n.s.                          | n.s.                           | 0,94                           |
| F5H / 1.14.-.-      | <u>Ccrd_005646</u> | -1,15                         | 2,92                           | 1,92                           |
|                     | <u>Ccrd_018817</u> | 1,45                          | -0,99                          | n.s.                           |
| COMT / 2.1.1.68     | <u>Ccrd_003701</u> | n.s.                          | -5,36                          | -3,70                          |
|                     | <u>Ccrd_017109</u> | 1,65                          | 1,55                           | 3,17                           |
|                     | <u>Ccrd_023910</u> | -0,81                         | -1,25                          | -1,35                          |
| CAD / 1.1.1.195     | <u>Ccrd_003953</u> | 0,65                          | 4,09                           | 4,53                           |
|                     | <u>Ccrd_010790</u> | n.s.                          | n.s.                           | -0,68                          |
|                     | <u>Ccrd_014274</u> | n.s.                          | -3,25                          | -1,97                          |
|                     | <u>Ccrd_020552</u> | -1,65                         | 3,99                           | n.s.                           |
|                     | <u>Ccrd_020565</u> | 5,67                          | 2,61                           | n.s.                           |
|                     | <u>Ccrd_023113</u> | n.s.                          | 0,45                           | 1,05                           |
| POD / 1.11.1.7      | <u>Ccrd_000351</u> | n.s.                          | 1,73                           | 2,22                           |
|                     | <u>Ccrd_000413</u> | n.s.                          | n.s.                           | -2,05                          |
|                     | <u>Ccrd_000415</u> | 9,56                          | n.s.                           | 8,77                           |
|                     | <u>Ccrd_001944</u> | n.s.                          | n.s.                           | -1,10                          |
|                     | <u>Ccrd_002344</u> | 5,07                          | n.s.                           | n.s.                           |
|                     | <u>Ccrd_002896</u> | n.s.                          | n.s.                           | 3,26                           |
|                     | <u>Ccrd_003014</u> | -1,68                         | -2,25                          | -1,53                          |
|                     | <u>Ccrd_004165</u> | -3,11                         | -1,02                          | -5,81                          |
|                     | <u>Ccrd_004297</u> | 4,15                          | 2,51                           | 2,54                           |
|                     | <u>Ccrd_004475</u> | 8,94                          | n.s.                           | n.s.                           |
|                     | <u>Ccrd_004478</u> | 3,78                          | 2,01                           | 3,19                           |
|                     | <u>Ccrd_004481</u> | 2,55                          | n.s.                           | 2,64                           |
|                     | <u>Ccrd_004506</u> | 0,93                          | -1,05                          | 1,77                           |
|                     | <u>Ccrd_004507</u> | -0,64                         | -1,35                          | n.s.                           |
|                     | <u>Ccrd_004510</u> | 2,01                          | n.s.                           | 2,22                           |
|                     | <u>Ccrd_004513</u> | 2,20                          | n.s.                           | 2,23                           |
|                     | <u>Ccrd_004514</u> | 5,69                          | n.s.                           | 2,83                           |
|                     | <u>Ccrd_005616</u> | 8,13                          | n.s.                           | n.s.                           |
|                     | <u>Ccrd_005687</u> | 5,89                          | 3,36                           | 4,14                           |

|                           |       |       |       |
|---------------------------|-------|-------|-------|
| <i>Ccrd_008380</i>        | 2,68  | -3,39 | -3,43 |
| <i>Ccrd_008387</i>        | 1,32  | n.s.  | 2,07  |
| <i>Ccrd_010480</i>        | n.s.  | n.s.  | -0,61 |
| <i>Ccrd_010635</i>        | 0,98  | -3,97 | n.s.  |
| <i>Ccrd_012678</i>        | 2,02  | 0,76  | 0,70  |
| <i>Ccrd_013040</i>        | n.s.  | -2,36 | n.s.  |
| <u><i>Ccrd_016862</i></u> | -1,59 | -1,39 | -2,94 |
| <i>Ccrd_017982</i>        | 7,29  | 5,19  | 6,50  |
| <i>Ccrd_018404</i>        | n.s.  | n.s.  | -0,72 |
| <i>Ccrd_018405</i>        | n.s.  | n.s.  | 4,54  |
| <i>Ccrd_018407</i>        | 8,45  | 6,76  | n.s.  |
| <i>Ccrd_018836</i>        | 2,30  | 3,92  | 1,82  |
| <u><i>Ccrd_019044</i></u> | -1,42 | -2,82 | -2,72 |
| <i>Ccrd_019198</i>        | n.s.  | n.s.  | -0,80 |
| <i>Ccrd_019305</i>        | 2,21  | 0,70  | 1,14  |
| <i>Ccrd_020667</i>        | 6,73  | n.s.  | n.s.  |
| <i>Ccrd_020740</i>        | n.s.  | 5,92  | n.s.  |
| <i>Ccrd_021508</i>        | 1,42  | n.s.  | n.s.  |
| <i>Ccrd_022196</i>        | 2,30  | 3,97  | 4,96  |
| <i>Ccrd_022197</i>        | -0,63 | 1,71  | 1,42  |
| <i>Ccrd_023159</i>        | 3,40  | 3,04  | 2,69  |
| <i>Ccrd_024377</i>        | 3,55  | 2,79  | 3,13  |

**Supporting Table S4: Expression levels of the genes involved in the phenylpropanoid pathway.** For each enzymatic step, differentially expressed genes (DEGs, FDR<0.05) between *AtMYB4oe* lines vs. WT are listed. Underlining indicates core-DEGs. n.s. = not significant.
