# Supplementary material for: Towards a Cardoon (Cynara cardunculus var. altilis)-Based Biorefinery: A Case Study of Improved Cell Cultures via Genetic Modulation of the Phenylpropanoid Pathway
Source: MDPI journal article supplement (doi:10.3390/ijms222111978), 2021-11-05
Supplement: s1 [file s1]

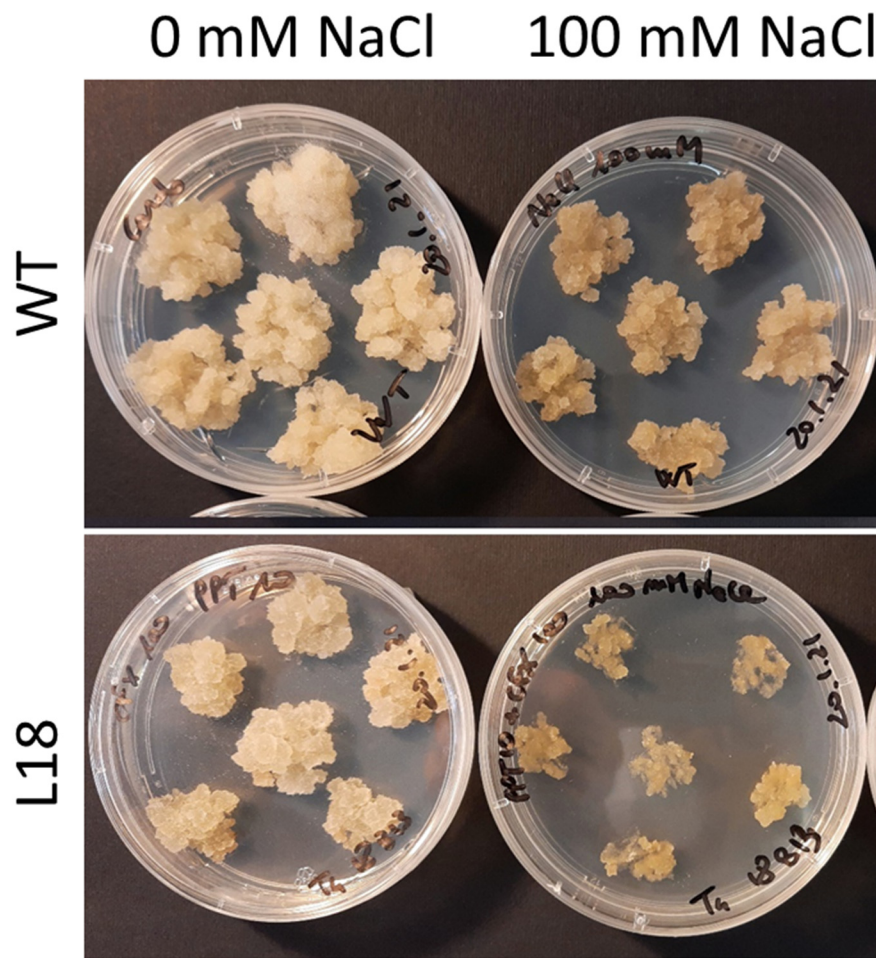

**Figure S1 – Growth under salt stress conditions:** WT and *AtMYB4oe* (L18) calluses grown on 0 or 100 mM NaCl-medium for 21 days.

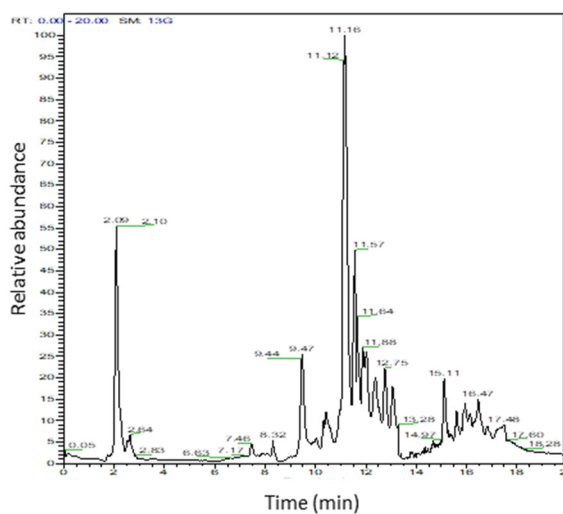

| Compounds                | tr    | theoretical mass [M-H] | experimental mass [M-H] | accuracy (D ppm) |
|--------------------------|-------|------------------------|-------------------------|------------------|
| 5 i FQA                  | 11,86 | 367,10345              | 367,10309               | -0,98            |
| 1,5-DiCQA                | 11,64 | 515,11950              | 515,11957               | 0,14             |
| 3,4-DiCQA                | 11,21 | 515,11950              | 515,11969               | 0,37             |
| 5-FQA                    | 10,82 | 367,10345              | 367,10315               | -0,82            |
| 3-FQA                    | 9,75  | 367,10345              | 367,10335               | -0,27            |
| 3-CQA                    | 8,30  | 353,08798              | 353,08783               | -0,42            |
| Coumaric acid            | 9,58  | 163,03917              | 163,03912               | -0,31            |
| Quercetin-glucoside      | 10,21 | 463,08835              | 463,08838               | 0,06             |
| Myricetin                | 10,61 | 317,03009              | 317,03027               | 0,57             |
| Kaempferol-3-O-glucoside | 10,65 | 447,09195              | 447,09326               | 2,93             |
| Naringin                 | 12,00 | 579,17193              | 579,17126               | -1,16            |
| Vitexin                  | 9,92  | 431,09837              | 431,09818               | -0,44            |
| Quercetin                | 11,28 | 301,03549              | 301,03510               | -1,30            |
| Diosmin                  | 11,38 | 607,16699              | 607,16724               | 0,41             |
| Luteolin                 | 11,54 | 285,04062              | 285,04028               | -1,19            |
| Kaempferol               | 11,89 | 285,04062              | 285,04025               | -1,30            |
| Naringenin               | 12,05 | 271,06110              | 271,06107               | -0,11            |
| Apigenin                 | 12,14 | 269,04555              | 269,04544               | -0,41            |

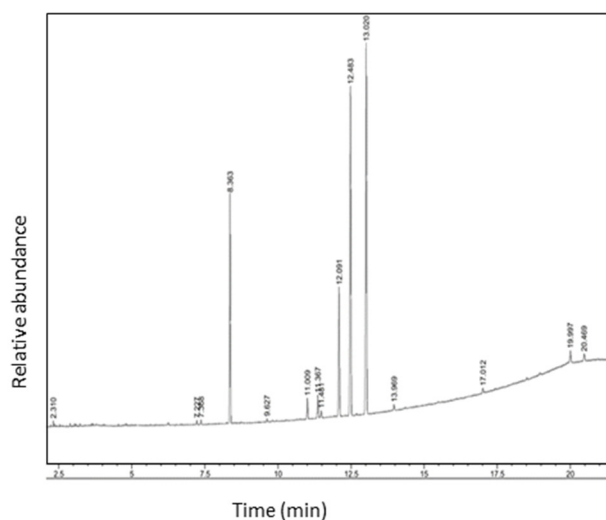

| FAME              | RT    |
|-------------------|-------|
| unkn              | 2.31  |
| MeC14:0           | 6.25  |
| MeC15:0           | 7.22  |
| unkn              | 7.37  |
| MeC16:0           | 8.36  |
| MeC17:0           | 9.62  |
| MeC18:0           | 11.01 |
| MeC18:1 c n9      | 11.36 |
| unkn              | 11.47 |
| MeC18:2 c n6 (LA) | 12.09 |
| MeC19:0 (IS)      | 12.48 |
| MeC18:3 n3 (ALA)  | 13.02 |
| MeC20:0           | 13.96 |
| MeC22:0           | 17.01 |
| MeC24:0           | 19.99 |
| MeC24:1           | 20.46 |

**Figure S2 – Biochemical profiles of phenols and fatty acids:** Typical chromatograms observed for the extracts of cardoon cell lines analyzed in this study and the mass specifications of the compounds of interest relative to phenolic compounds (separation via UHPLC, upper row) and typical chromatogram and peak identification for fatty acids (separation via GC, lower row).

(a)

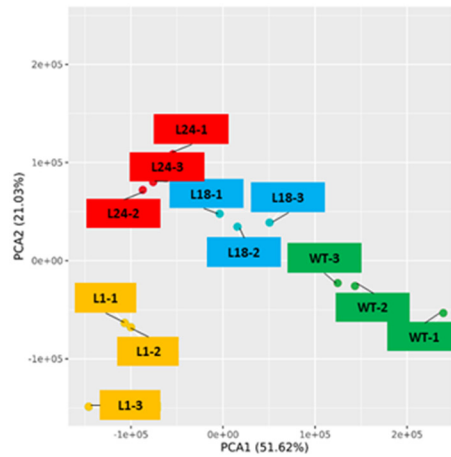

(b)

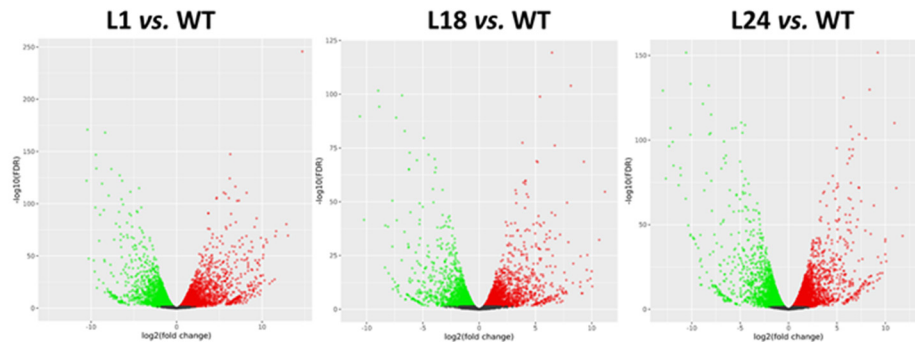

(c)

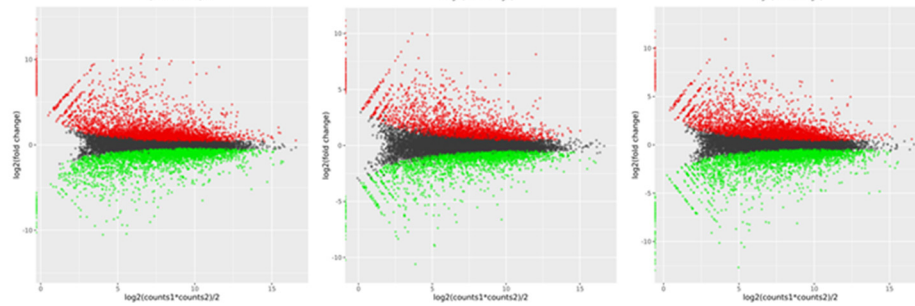

**Figure S3 - Preliminary analyses on RNA-seq dataset:** (a) Principal Component Analysis (PCA) of the 12 samples used in RNA-seq of WT and *AtMYB4oe* lines (L1, L18 and L24). For the first two PC calculated (PCA1 and PCA2) the percentage of explained variance of the dataset is visualized; (b) Volcano plots and (c) MA-plots of the differentially expressed genes - DEGs (FDR<0,05) identified from the comparison L1 vs. WT, L18 vs. WT and L24 vs. WT (green = upregulated, red = downregulated, grey = not significant).

| Gene               | AtMYB4oe line | log2(FC RT-qPCR) | log2(FC RNA-seq) |
|--------------------|---------------|------------------|------------------|
| <i>Ccrd_010165</i> | L1            | -1.84            | -2.55            |
| <i>Ccrd_010165</i> | L18           | -1.89            | -2.05            |
| <i>Ccrd_010165</i> | L24           | -2.25            | -2.41            |
| <i>Ccrd_015556</i> | L1            | -0.79            | -1.60            |
| <i>Ccrd_015556</i> | L18           | -2.00            | -2.09            |
| <i>Ccrd_015556</i> | L24           | -1.56            | -2.03            |
| <i>Ccrd_015561</i> | L1            | -6.64            | -4.81            |
| <i>Ccrd_015561</i> | L18           | -2.32            | -3.92            |
| <i>Ccrd_015561</i> | L24           | -5.06            | -4.88            |
| <i>Ccrd_004659</i> | L1            | -7.97            | -6.66            |
| <i>Ccrd_004659</i> | L18           | -4.06            | -4.92            |
| <i>Ccrd_004659</i> | L24           | -8.97            | -7.99            |
| <i>Ccrd_019107</i> | L1            | -5.64            | -2.62            |
| <i>Ccrd_019107</i> | L18           | -8.97            | -7.71            |
| <i>Ccrd_019107</i> | L24           | -3.47            | -2.60            |
| <i>Ccrd_010818</i> | L1            | -2.94            | -2.78            |
| <i>Ccrd_010818</i> | L18           | -2.91            | -2.44            |
| <i>Ccrd_010818</i> | L24           | -4.06            | -4.95            |
| <i>Ccrd_024577</i> | L1            | 2.40             | 2.96             |
| <i>Ccrd_024577</i> | L18           | 4.06             | 2.39             |
| <i>Ccrd_024577</i> | L24           | 0.77             | 2.14             |
| <i>Ccrd_000418</i> | L1            | 3.02             | 5.01             |
| <i>Ccrd_000418</i> | L18           | 8.73             | 8.14             |
| <i>Ccrd_000418</i> | L24           | 4.50             | 6.63             |
| <i>Ccrd_016332</i> | L1            | 1.74             | 1.81             |
| <i>Ccrd_016332</i> | L18           | 5.16             | 1.70             |
| <i>Ccrd_016332</i> | L24           | 3.66             | 1.76             |

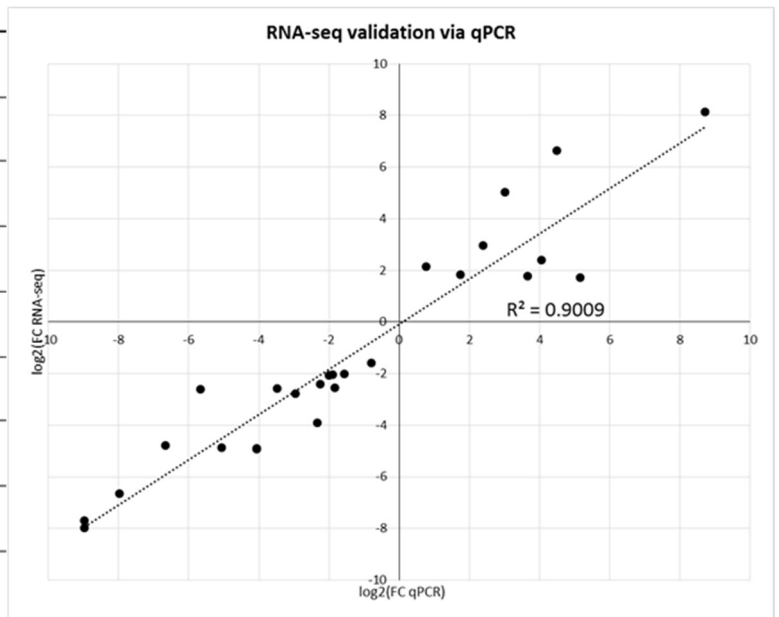

Figure S4 – Validation of RNA-seq expression levels via RT-qPCR.

## HYDROXYCINNAMIC ACIDS

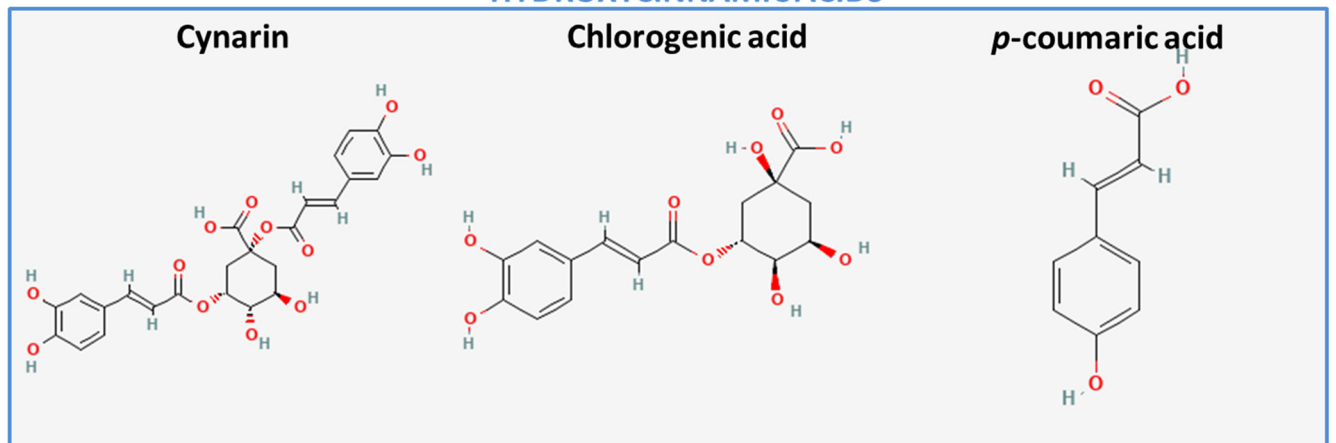

## FLAVONES

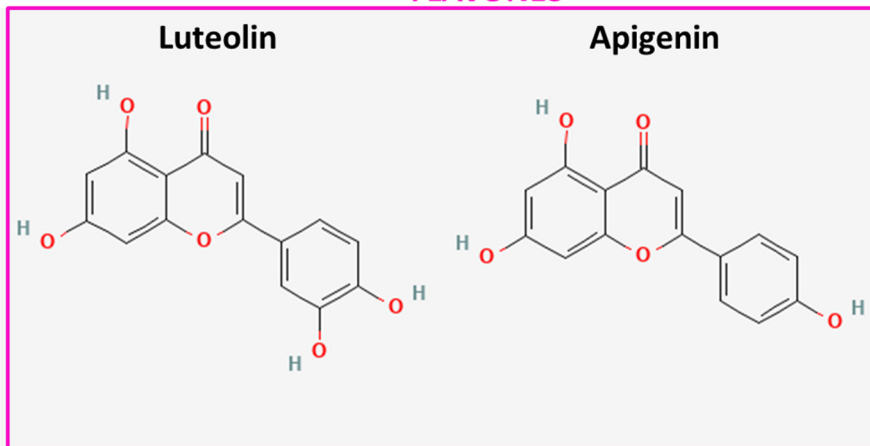

## FLAVANONES

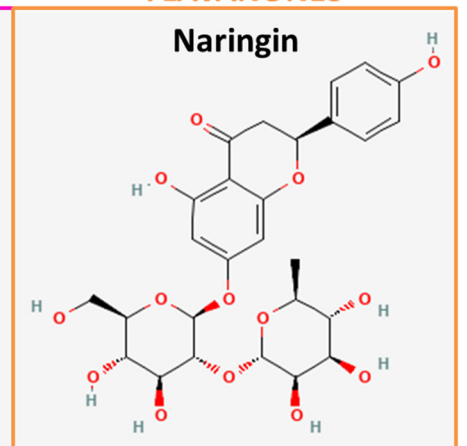

## FLAVONOLS

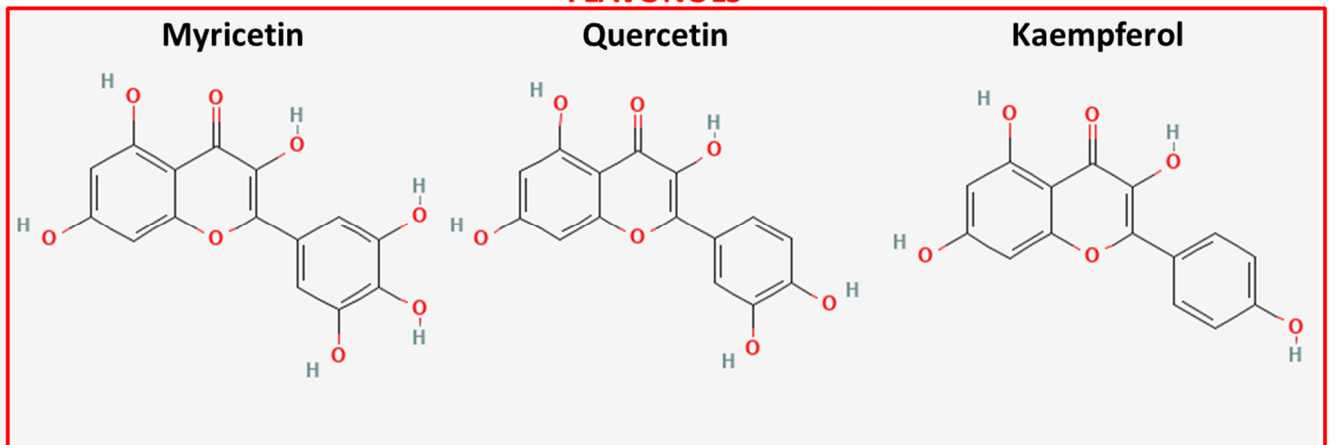

Figure S5 – Molecular structures of the main phenolic compounds identified in WT and transgenic cardoon lines.
