# Supplementary material for: Towards a Cardoon (Cynara cardunculus var. altilis)-Based Biorefinery: A Case Study of Improved Cell Cultures via Genetic Modulation of the Phenylpropanoid Pathway
Source: Int J Mol Sci. 2021 Nov 5;22(21):11978. doi: 10.3390/ijms222111978 (PMC8584892; doi:10.3390/ijms222111978)
Supplement: Supplementary file 1 [file ijms-22-11978-s001.zip]

Archive with 7 entries (7 files):
- Supplementary Figures and Tables - REVIEWED.pdf
- Table S1 - Mapping statistics of RNA-seq.pdf
- Table S2 - Lists of DEGs.xlsx
- Table S3 - Lists of GO terms.xlsx
- Table S4 - Expression levels of the genes involved in the phenylpropanoid pathway..pdf
- Table S5 - Expression levels of the genes encoding SAD and FAD2 activities.pdf
- Table S6 - Primers.pdf
