# Supplementary material for: Towards a Cardoon (Cynara cardunculus var. altilis)-Based Biorefinery: A Case Study of Improved Cell Cultures via Genetic Modulation of the Phenylpropanoid Pathway
Source: Int J Mol Sci. 2021 Nov 5;22(21):11978. doi: 10.3390/ijms222111978 (PMC8584892; doi:10.3390/ijms222111978)
Supplement: Supplementary file 1 [file ijms-22-11978-s001.zip › Table S2 - Lists of DEGs.xlsx]

## Sheet: L1.UP
Gene ID	Gene description	logFC	P-value	FDR	Mean FPKM reference	Mean FPKM query
Ccrd_006168		6.82447	2.58669e-46	2.92538e-44	0.783099	95.6797
Ccrd_016088	Major facilitator superfamily domain, general substrate transporter [Uniprot/SPTREMBL Acc. A0A103YAM0]	6.81821	7.81539e-07	4.73354e-06	0	0.495695
Ccrd_004299	CASP-like protein [Uniprot/SPTREMBL Acc. A0A103XMT8]	9.72704	5.91465e-15	9.94638e-14	0	10.7642
Ccrd_025611	Uncharacterized protein [Uniprot/SPTREMBL Acc. A0A103WAR2]	6.79443	7.05614e-11	7.68349e-10	0.0182534	2.97368
Ccrd_020667	Peroxidase [Uniprot/SPTREMBL Acc. A0A118K0C2]	6.72888	7.79405e-10	7.48407e-09	0	0.667255
Ccrd_018024		6.81087	7.01053e-62	1.47366e-59	0.705739	83.7124
Ccrd_018362	Gb3_synth domain-containing protein [Uniprot/SPTREMBL Acc. A0A103Y6C6]	6.70301	2.71716e-17	5.73658e-16	0.0187146	2.63462
Ccrd_005868	Peptidase S8/S53 domain-containing protein [Uniprot/SPTREMBL Acc. A0A103XJV5]	6.54609	8.29357e-07	4.99655e-06	0	0.341514
Ccrd_025243	Cytochrome P450 [Uniprot/SPTREMBL Acc. A0A103XB73]	6.495	2.49467e-62	5.3016e-60	0.130555	12.752
Ccrd_004709	MFS domain-containing protein [Uniprot/SPTREMBL Acc. A0A103XMJ5]	7.07927	2.7126e-106	2.09836e-103	0.823941	119.445
Ccrd_019435	Uncharacterized protein [Uniprot/SPTREMBL Acc. A0A118K141]	7.08937	7.77957e-49	9.96352e-47	0.365432	52.4544
Ccrd_016193	Hydrolase_4 domain-containing protein [Uniprot/SPTREMBL Acc. A0A103YAE0]	7.092	5.46149e-09	4.71306e-08	0	0.967097
Ccrd_025740	AB hydrolase-1 domain-containing protein [Uniprot/SPTREMBL Acc. A0A103UZQ9]	7.06439	3.01457e-11	3.40133e-10	0	0.71481
Ccrd_025508		7.15955	1.61701e-12	2.10723e-11	0	2.65678
Ccrd_013389		7.07812	3.06414e-12	3.8781e-11	0	5.91298
Ccrd_022785	Malate synthase [Uniprot/SPTREMBL Acc. A0A103XXY2]	5.98422	7.62542e-10	7.33672e-09	0.0440545	3.03638
Ccrd_026752	Phospholipase A2, active site-containing protein [Uniprot/SPTREMBL Acc. A0A118JSD2]	7.10344	4.99728e-26	2.0303e-24	0.0869458	13.455
Ccrd_023569		7.28479	3.39848e-19	8.58004e-18	0.0383159	7.04416
Ccrd_018982		7.49845	1.60555e-17	3.47311e-16	0.0270043	6.52376
Ccrd_008683	Phytocyanin domain-containing protein [Uniprot/SPTREMBL Acc. A0A103XEL9]	7.46499	9.60945e-09	7.97584e-08	0	1.70423
Ccrd_016937	Cytochrome P450 [Uniprot/SPTREMBL Acc. A0A124SFY7]	7.28219	2.92374e-11	3.3027e-10	0	0.737685
Ccrd_007203	MLO-like protein [Uniprot/SPTREMBL Acc. A0A118JTF1]	7.41528	2.24511e-61	4.43042e-59	0.129473	24.0028
Ccrd_000945	Aspergillus nuclease S(1) [Uniprot/SPTREMBL Acc. A0A103XUA8]	7.33323	7.44428e-13	1.00045e-11	0	1.39329
Ccrd_012854		7.5923	1.90738e-49	2.59767e-47	1.78045	358.963
Ccrd_021367	AWPM-19-like protein [Uniprot/SPTREMBL Acc. A0A103Y0N1]	7.18137	1.50559e-07	1.03067e-06	0	1.55023
Ccrd_023815	BHLH domain-containing protein [Uniprot/SPTREMBL Acc. A0A103XW31]	7.56213	1.19454e-11	1.42161e-10	0	1.63275
Ccrd_025116	Peroxidase [Uniprot/SPTREMBL Acc. A0A103XBD6]	7.34031	8.58057e-68	2.18342e-65	0.133913	23.5836
Ccrd_000761		7.34244	2.23723e-06	1.24757e-05	0.0134946	2.79054
Ccrd_011781		7.31519	2.23084e-13	3.16525e-12	0	0.950022
Ccrd_007902	Tubulin_C domain-containing protein [Uniprot/SPTREMBL Acc. A0A103XG09]	7.54897	2.01866e-32	1.21996e-30	0.0293983	6.81786
Ccrd_021684	CASP-like protein [Uniprot/SPTREMBL Acc. A0A103Y039]	7.52254	3.47443e-35	2.39117e-33	0.0292274	7.3101
Ccrd_008236	Oleosin [Uniprot/SPTREMBL Acc. A0A124SB76]	7.49904	1.04489e-07	7.38295e-07	0	3.74763
Ccrd_017982	Peroxidase [Uniprot/SPTREMBL Acc. A0A103Y719]	7.29079	1.28375e-106	1.03444e-103	2.6025	438.363
Ccrd_010683	Fatty acid desaturase, type 2 [Uniprot/SPTREMBL Acc. A0A103YKN6]	7.30984	1.29146e-08	1.04895e-07	0	0.999823
Ccrd_007917	Initiation factor 2B-related protein [Uniprot/SPTREMBL Acc. A0A103XG21]	7.41732	3.16938e-26	1.30967e-24	0.0772272	15.5973
Ccrd_000051		7.46306	7.36651e-13	9.90688e-12	0	1.47116
Ccrd_008818	PMEI domain-containing protein [Uniprot/SPTREMBL Acc. A0A118JSX0]	7.38247	3.27554e-10	3.32001e-09	0	2.23844
Ccrd_002006		7.17327	5.19541e-31	2.91229e-29	0.731095	112.847
Ccrd_024829	F-box domain-containing protein [Uniprot/SPTREMBL Acc. A0A103XBV7]	7.27079	6.82538e-13	9.20474e-12	0	1.10806
Ccrd_012062	HMA domain-containing protein [Uniprot/SPTREMBL Acc. A0A103YI52]	7.36161	1.03932e-13	1.52268e-12	0	1.17227
Ccrd_003128	DOG1 domain-containing protein [Uniprot/SPTREMBL Acc. A0A103XQ13]	7.2591	6.29656e-12	7.69716e-11	0	1.79893
Ccrd_017524	Aromatic-L-amino-acid decarboxylase [Uniprot/SPTREMBL Acc. A0A103Y7X0]	7.64339	1.62639e-15	2.89888e-14	0	1.10869
Ccrd_007797		7.63629	2.82043e-12	3.58608e-11	0	2.49324
Ccrd_001914	Auxin responsive SAUR protein [Uniprot/SPTREMBL Acc. A0A124SD69]	7.65547	1.53693e-70	4.43622e-68	0.185258	42.1174
Ccrd_010291		9.35457	2.395e-89	1.18761e-86	0.044759	45.0565
Ccrd_003555	Cupin type-1 domain-containing protein [Uniprot/SPTREMBL Acc. A0A103XPB5]	6.48336	7.55053e-08	5.4546e-07	0	0.502032
Ccrd_011016	Uncharacterized protein [Uniprot/SPTREMBL Acc. A0A103YK21]	6.465	8.04383e-24	2.78781e-22	0.203069	19.2089
Ccrd_019282		6.45609	4.24321e-08	3.1992e-07	0	1.98339
Ccrd_016753		6.85475	3.22205e-10	3.2675e-09	0	1.64626
Ccrd_023835	GMC_OxRdtase_N domain-containing protein [Uniprot/SPTREMBL Acc. A0A103XW33]	6.97594	2.82553e-06	1.54533e-05	0	0.472328
Ccrd_014872	BHLH domain-containing protein [Uniprot/SPTREMBL Acc. A0A103YCW1]	6.87655	3.02433e-120	4.49904e-117	0.791303	99.0506
Ccrd_018518		6.84673	7.15466e-06	3.6402e-05	0	0.877107
Ccrd_026415	CASP-like protein [Uniprot/SPTREMBL Acc. A0A118HD88]	6.93309	1.13012e-85	5.46385e-83	0.363783	48.2583
Ccrd_017000	ABC transporter domain-containing protein [Uniprot/SPTREMBL Acc. A0A103Y8X3]	6.96304	1.43164e-54	2.38677e-52	0.163988	21.8551
Ccrd_017644	UDP-glucuronosyl/UDP-glucosyltransferase [Uniprot/SPTREMBL Acc. A0A118K298]	8.74054	4.109e-57	7.15892e-55	0.059063	28.7785
Ccrd_017405		6.92412	1.22447e-29	6.41737e-28	0.107818	14.517
Ccrd_002680	AA_permease_C domain-containing protein [Uniprot/SPTREMBL Acc. A0A103XQX6]	6.90243	2.45017e-10	2.5124e-09	0	0.559112
Ccrd_022632	TMEM189_B_dmain domain-containing protein [Uniprot/SPTREMBL Acc. A0A103XYI2]	6.89499	6.427e-08	4.70802e-07	0	1.11871
Ccrd_015162	CYC/TB1, R domain-containing protein [Uniprot/SPTREMBL Acc. A0A103YCC2]	6.8971	1.22282e-06	7.12077e-06	0	0.649608
Ccrd_004062	PNP_UDP_1 domain-containing protein [Uniprot/SPTREMBL Acc. A0A118JVD0]	6.54678	5.14729e-31	2.8937e-29	0.261809	25.683
Ccrd_010898	Knot1 domain-containing protein [Uniprot/SPTREMBL Acc. A0A103YKF0]	9.44093	1.39658e-39	1.17941e-37	0.0821151	76.0723
Ccrd_008166	Pectinesterase [Uniprot/SPTREMBL Acc. A0A103XFK7]	9.69622	1.01209e-43	1.01942e-41	0	3.35461
Ccrd_011188	AAI domain-containing protein [Uniprot/SPTREMBL Acc. A0A103YK09]	9.65591	6.48856e-49	8.42163e-47	6.46389	5571.51
Ccrd_004184		9.51726	2.28414e-23	7.70907e-22	0	18.6816
Ccrd_017163	Pectinesterase inhibitor [Uniprot/SPTREMBL Acc. A0A103Y8L3]	9.46511	8.25984e-17	1.65702e-15	0	6.35222
Ccrd_022726	Peptidase A1 domain-containing protein [Uniprot/SPTREMBL Acc. A0A103XY87]	9.52002	7.13069e-46	7.83525e-44	0.139157	110.787
Ccrd_019170	BHLH domain-containing protein [Uniprot/SPTREMBL Acc. A0A103Y4T9]	9.32907	1.0769e-30	5.98454e-29	0	9.04631
Ccrd_000415	Peroxidase [Uniprot/SPTREMBL Acc. A0A118JYA1]	9.5605	3.05782e-26	1.269e-24	0	5.33678
Ccrd_012949		9.21556	1.49122e-48	1.87265e-46	0.0123615	11.0915
Ccrd_019559	DOG1 domain-containing protein [Uniprot/SPTREMBL Acc. A0A118K116]	9.21738	2.79842e-32	1.68594e-30	0	6.81222
Ccrd_016370	BZIP domain-containing protein [Uniprot/SPTREMBL Acc. A0A103YA63]	7.0521	1.6916e-10	1.77119e-09	0.0387105	7.51486
Ccrd_018760	Ammonium transporter [Uniprot/SPTREMBL Acc. A0A103Y5L8]	8.4471	2.51464e-15	4.393e-14	0	2.21924
Ccrd_012956	Uncharacterized protein [Uniprot/SPTREMBL Acc. A0A124SH74]	8.26957	2.34313e-09	2.11451e-08	0	1.17583
Ccrd_012195	Uncharacterized protein [Uniprot/SPTREMBL Acc. A0A103YHX8]	8.01357	1.56352e-35	1.09554e-33	0.139546	37.5765
Ccrd_004215	Uncharacterized protein [Uniprot/SPTREMBL Acc. A0A103XN91]	9.0397	3.4443e-21	1.00923e-19	0	4.28542
Ccrd_010922	RNase III domain-containing protein [Uniprot/SPTREMBL Acc. A0A103YK79]	8.60916	4.67203e-12	5.8067e-11	0	4.81583
Ccrd_012505	NAC domain-containing protein [Uniprot/SPTREMBL Acc. A0A103YHB2]	6.67397	1.42993e-09	1.32821e-08	0	0.738261
Ccrd_012736	Concanavalin A-like lectin/glucanase superfamily [Uniprot/SPTREMBL Acc. A0A103YGX9]	8.76379	9.87871e-40	8.49087e-38	0.0059889	3.63428
Ccrd_016310	Major facilitator superfamily domain, general substrate transporter [Uniprot/SPTREMBL Acc. A0A118K351]	8.59587	2.64896e-19	6.7317e-18	0	1.40076
Ccrd_004534	ABC transporter domain-containing protein [Uniprot/SPTREMBL Acc. A0A103XMH9]	12.8391	1.0089e-83	4.53748e-81	0	67.4691
Ccrd_001240	Oligopeptide transporter OPT superfamily [Uniprot/SPTREMBL Acc. A0A103XTM1]	11.6458	6.00161e-77	2.14936e-74	0	10.9085
Ccrd_008423		8.5003	1.12412e-19	2.94571e-18	0	3.83524
Ccrd_017564	Auxin responsive SAUR protein [Uniprot/SPTREMBL Acc. A0A118K2C1]	8.65636	7.81323e-24	2.71763e-22	0	4.20918
Ccrd_000776	UDP-glucuronosyl/UDP-glucosyltransferase [Uniprot/SPTREMBL Acc. A0A103XUF3]	10.1646	4.47408e-63	9.83231e-61	0.100188	128.531
Ccrd_020025		7.18095	9.20955e-10	8.77357e-09	0	1.43001
Ccrd_021731	Chloramphenicol acetyltransferase-like domain-containing protein [Uniprot/SPTREMBL Acc. A0A103Y005]	7.1693	3.93645e-11	4.39532e-10	0	1.11322
Ccrd_006305	Protein kinase domain-containing protein [Uniprot/SPTREMBL Acc. A0A118JUF8]	6.63278	9.47295e-09	7.87268e-08	0	0.404967
Ccrd_014306		5.95936	1.98616e-05	9.30035e-05	0	0.942149
Ccrd_024494		8.81173	9.79229e-25	3.6348e-23	0	3.23125
Ccrd_014895	Peptidase A1 domain-containing protein [Uniprot/SPTREMBL Acc. A0A118K405]	8.85579	4.29698e-39	3.52116e-37	0.402006	195.131
Ccrd_020713	Lipase_3 domain-containing protein [Uniprot/SPTREMBL Acc. A0A103Y1Y1]	8.82574	5.95083e-15	9.99854e-14	0	2.94477
Ccrd_001275	Endoglucanase [Uniprot/SPTREMBL Acc. A0A118JXZ4]	6.579	2.61232e-17	5.52731e-16	0.0141251	2.04681
Ccrd_005337		9.0123	6.5305e-18	1.48406e-16	0.109415	60.0257
Ccrd_021217	ABC transporter domain-containing protein [Uniprot/SPTREMBL Acc. A0A103Y100]	8.88482	3.8128e-61	7.229e-59	0.0635781	33.3674
Ccrd_004541	ABC transporter domain-containing protein [Uniprot/SPTREMBL Acc. A0A103XMT5]	9.19668	5.6044e-24	1.9778e-22	0	2.54054
Ccrd_004156		9.12254	4.97278e-81	2.00351e-78	7.14632	4303.8
Ccrd_018616	Aminotran_5 domain-containing protein [Uniprot/SPTREMBL Acc. A0A118K1P9]	7.90357	9.73547e-49	1.23865e-46	0.168165	42.1435
Ccrd_015711		9.14357	3.00619e-13	4.20366e-12	0	6.39618
Ccrd_025281	HMA domain-containing protein [Uniprot/SPTREMBL Acc. A0A103XDT6]	9.06872	1.23929e-27	5.65249e-26	0	4.36499
Ccrd_006796	PPC domain-containing protein [Uniprot/SPTREMBL Acc. A0A118JTQ1]	8.97409	5.50172e-19	1.36934e-17	0	8.03181
Ccrd_009732		8.95091	7.98858e-19	1.96304e-17	0	7.30238
Ccrd_005981		6.56177	2.93657e-08	2.25896e-07	0	1.34843
Ccrd_024814		6.59264	2.49038e-07	1.64317e-06	0	1.20811
Ccrd_008163		6.67168	3.71459e-57	6.53058e-55	0.107259	11.8038
Ccrd_022827		6.59617	2.80764e-09	2.51259e-08	0	1.4495
Ccrd_004475	Peroxidase [Uniprot/SPTREMBL Acc. A0A103XMB8]	8.94129	4.8129e-20	1.29453e-18	0	2.12001
Ccrd_018248	BHLH domain-containing protein [Uniprot/SPTREMBL Acc. A0A118K1W0]	6.6277	2.16183e-09	1.96188e-08	0	1.2469
Ccrd_006028	Uncharacterized protein [Uniprot/SPTREMBL Acc. A0A103XJI3]	6.67134	1.66187e-09	1.5297e-08	0	1.60808
Ccrd_025648		6.54847	1.54887e-08	1.2398e-07	0	0.122015
Ccrd_002498	Glycoside hydrolase, catalytic domain-containing protein [Uniprot/SPTREMBL Acc. A0A118JW93]	8.04026	1.2878e-11	1.52137e-10	0	2.09107
Ccrd_018407	Peroxidase [Uniprot/SPTREMBL Acc. A0A103Y696]	8.44742	1.37849e-57	2.44574e-55	0.266787	97.3853
Ccrd_020037	Uncharacterized protein [Uniprot/SPTREMBL Acc. A0A124SEZ9]	8.45943	6.97147e-23	2.28124e-21	0	1.26314
Ccrd_026644		8.36369	2.46966e-38	2.00675e-36	0.206921	77.093
Ccrd_007836		8.36074	1.02932e-41	9.52441e-40	5.07813	1736.07
Ccrd_014675		8.16929	7.00862e-14	1.04021e-12	0	4.22751
Ccrd_002045		8.17757	2.49605e-49	3.35216e-47	0.0153672	6.08054
Ccrd_004706	AAI domain-containing protein [Uniprot/SPTREMBL Acc. A0A103XM01]	8.27913	5.10084e-51	7.36157e-49	12.1018	4000.69
Ccrd_008484		8.36177	3.49034e-46	3.92441e-44	0.173016	61.9057
Ccrd_016719	Aquaporin-like protein [Uniprot/SPTREMBL Acc. A0A103Y9E8]	8.169	3.40497e-72	1.09748e-69	0.190934	59.4526
Ccrd_024291		8.33923	1.40977e-24	5.15378e-23	0.0305294	13.6059
Ccrd_018352	CBM20 domain-containing protein [Uniprot/SPTREMBL Acc. A0A103Y6D5]	8.03547	5.13623e-17	1.05334e-15	0	1.38158
Ccrd_025821	Auxin-responsive protein [Uniprot/SPTREMBL Acc. A0A103XDP1]	8.36909	4.39301e-23	1.45723e-21	0	2.6424
Ccrd_026403	Auxin responsive SAUR protein [Uniprot/SPTREMBL Acc. A0A118HFD9]	7.72413	5.3542e-17	1.09455e-15	0	2.19238
Ccrd_020743	Lipase_GDSL domain-containing protein [Uniprot/SPTREMBL Acc. A0A103Y1V2]	9.27133	6.28874e-21	1.8071e-19	0	3.9046
Ccrd_004741	Dehydrin [Uniprot/SPTREMBL Acc. A0A124SCA9]	8.19015	3.68725e-114	4.19457e-111	0.181584	61.3071
Ccrd_005616	Peroxidase [Uniprot/SPTREMBL Acc. A0A103XKM0]	8.12718	6.43147e-07	3.94476e-06	0	2.6067
Ccrd_010588		8.08463	1.15423e-14	1.87893e-13	0	1.69389
Ccrd_013923	Chloramphenicol acetyltransferase-like domain-containing protein [Uniprot/SPTREMBL Acc. A0A103YEP0]	11.4657	6.62112e-30	3.52743e-28	0	5.21106
Ccrd_014629	Fe2OG dioxygenase domain-containing protein [Uniprot/SPTREMBL Acc. A0A103YDD3]	11.5438	3.79086e-72	1.20183e-69	0	20.3266
Ccrd_004322	Myc-type, basic helix-loop-helix (BHLH) domain-containing protein [Uniprot/SPTREMBL Acc. A0A103XN26]	10.4578	7.11781e-69	1.88563e-66	0	7.57058
Ccrd_000409	IPPc domain-containing protein [Uniprot/SPTREMBL Acc. A0A103XV74]	14.7038	1.09372e-250	2.11514e-246	0	173.986
Ccrd_022005	Glycoside hydrolase, family 28 [Uniprot/SPTREMBL Acc. A0A103XZI4]	10.5724	4.56589e-66	1.07683e-63	0.0954982	160.701
Ccrd_013326	AAI domain-containing protein [Uniprot/SPTREMBL Acc. A0A103YFS4]	7.01051	1.05425e-21	3.16096e-20	0.0603546	9.08486
Ccrd_024592	Fe2OG dioxygenase domain-containing protein [Uniprot/SPTREMBL Acc. A0A103XC66]	6.98287	2.67951e-10	2.74175e-09	0	0.971199
Ccrd_026452	Uncharacterized protein [Uniprot/SPTREMBL Acc. A0A103PZV4]	7.03586	1.65163e-11	1.92183e-10	0	1.13059
Ccrd_019234		6.9699	1.5008e-07	1.02776e-06	0	0.607925
Ccrd_015759	AAA+ ATPase domain-containing protein [Uniprot/SPTREMBL Acc. A0A124SGB7]	7.01562	6.79217e-12	8.26125e-11	0	0.276134
Ccrd_008483		6.97918	5.25725e-42	4.93544e-40	0.51266	68.6591
Ccrd_023361		7.93694	2.53229e-54	4.18564e-52	0.259053	67.9723
Ccrd_001363	SGNH hydrolase-type esterase domain-containing protein [Uniprot/SPTREMBL Acc. A0A124SDD1]	7.73781	4.29607e-06	2.28561e-05	0	2.27989
Ccrd_020711	Lipase_3 domain-containing protein [Uniprot/SPTREMBL Acc. A0A103Y1Z0]	6.01204	2.32799e-05	0.0001075	0	0.410818
Ccrd_023036	Major facilitator superfamily domain, general substrate transporter [Uniprot/SPTREMBL Acc. A0A118JZ16]	7.8737	7.61252e-09	6.4008e-08	0	1.46976
Ccrd_006327	Exonuclease domain-containing protein [Uniprot/SPTREMBL Acc. A0A103XIY4]	7.93911	2.8785e-11	3.25731e-10	0	3.01915
Ccrd_026874		7.94439	1.56572e-17	3.39076e-16	0	2.96044
Ccrd_020906	OBG-type G domain-containing protein [Uniprot/SPTREMBL Acc. A0A124SEQ0]	8.68014	4.96297e-27	2.14239e-25	0	4.22952
Ccrd_003639		8.75564	1.3701e-23	4.68963e-22	0	3.0599
Ccrd_004533	ABC2_membrane domain-containing protein [Uniprot/SPTREMBL Acc. A0A118JVX7]	13.0254	1.11341e-72	3.64953e-70	0	59.7448
Ccrd_014557	Fe2OG dioxygenase domain-containing protein [Uniprot/SPTREMBL Acc. A0A103YDG2]	11.1845	3.45112e-28	1.64793e-26	0	17.8704
Ccrd_013750	Nodulin-like domain-containing protein [Uniprot/SPTREMBL Acc. A0A103YF08]	10.8763	8.32213e-26	3.31839e-24	0	8.34117
Ccrd_008943	Glycoside hydrolase, family 28 [Uniprot/SPTREMBL Acc. A0A124SAZ8]	9.46237	3.8474e-46	4.27614e-44	0.510729	378.885
Ccrd_004951	AAA+ ATPase domain-containing protein [Uniprot/SPTREMBL Acc. A0A103XM26]	8.75942	1.02867e-66	2.48667e-64	0.00512493	3.11915
Ccrd_023570	UDP-glucuronosyl/UDP-glucosyltransferase [Uniprot/SPTREMBL Acc. A0A103XWJ7]	8.74103	4.17619e-14	6.33935e-13	0	1.97948
Ccrd_013051	Uncharacterized protein [Uniprot/SPTREMBL Acc. A0A103YGF2]	10.1434	5.63667e-54	9.08397e-52	0	14.4173
Ccrd_016016	Glycoside hydrolase, family 28 [Uniprot/SPTREMBL Acc. A0A103YAR6]	10.1501	3.13561e-61	6.00391e-59	0.233963	281.54
Ccrd_025965		6.01487	3.71785e-06	1.99359e-05	0	1.21179
Ccrd_020780		6.01894	4.63799e-06	2.44932e-05	0	2.27146
Ccrd_017981		6.02109	8.78903e-22	2.6558e-20	0.104361	7.89839
Ccrd_008730	AP2/ERF domain-containing protein [Uniprot/SPTREMBL Acc. A0A103XEP8]	6.03147	3.92705e-17	8.14863e-16	0.0544596	4.67829
Ccrd_023756		6.04183	8.6771e-06	4.34619e-05	0	1.07842
Ccrd_023568	UDP-glucuronosyl/UDP-glucosyltransferase [Uniprot/SPTREMBL Acc. A0A103XWH4]	6.05792	2.08104e-42	1.99233e-40	0.125086	8.73304
Ccrd_009125	Gibberellin regulated protein [Uniprot/SPTREMBL Acc. A0A124SIE4]	6.05991	4.79495e-06	2.52532e-05	0	1.30044
Ccrd_001425	Bet_v_1 domain-containing protein [Uniprot/SPTREMBL Acc. A0A118JX13]	6.06238	3.61984e-52	5.51213e-50	0.511349	36.3239
Ccrd_010219	START domain-containing protein [Uniprot/SPTREMBL Acc. A0A124SI30]	6.0768	1.77909e-05	8.41217e-05	0	0.652554
Ccrd_019015	Cysteine peptidase, asparagine active site-containing protein [Uniprot/SPTREMBL Acc. A0A118K1D4]	6.11443	5.07168e-109	4.67053e-106	1.57961	118.351
Ccrd_003582	Bax inhibitor 1-related protein [Uniprot/SPTREMBL Acc. A0A124SCN6]	6.13182	7.26892e-09	6.13591e-08	0.0287403	2.66864
Ccrd_018114	GTP cyclohydrolase II [Uniprot/SPTREMBL Acc. A0A103Y6V4]	6.14746	6.63069e-26	2.65488e-24	0.0262069	2.33665
Ccrd_011041	Fe2OG dioxygenase domain-containing protein [Uniprot/SPTREMBL Acc. A0A103YK52]	6.16755	3.12063e-34	2.08823e-32	0.475821	35.5863
Ccrd_015881	Exocyst subunit Exo70 family protein [Uniprot/SPTREMBL Acc. A0A103YAV4]	6.16863	2.85848e-05	0.000129614	0	0.329896
Ccrd_013862		6.17244	1.51305e-56	2.61258e-54	0.429026	32.6739
Ccrd_006831	Glycoside hydrolase, catalytic domain-containing protein [Uniprot/SPTREMBL Acc. A0A103XI35]	6.17377	9.0599e-22	2.73338e-20	0.0293816	2.62673
Ccrd_011701	Chloramphenicol acetyltransferase-like domain-containing protein [Uniprot/SPTREMBL Acc. A0A103YIV3]	6.21714	3.42597e-128	7.36166e-125	0.534942	42.577
Ccrd_018480	Mannan endo-1,4-beta-mannosidase [Uniprot/SPTREMBL Acc. A0A103Y641]	6.24861	1.54787e-07	1.057e-06	0	0.361684
Ccrd_003339	3-ketoacyl-CoA synthase [Uniprot/SPTREMBL Acc. A0A103XPL2]	6.25798	7.88119e-05	0.00032602	0	0.454477
Ccrd_012788	Transcription repressor [Uniprot/SPTREMBL Acc. A0A118K5C9]	6.27743	2.43845e-07	1.61166e-06	0.0267655	2.82923
Ccrd_017568	Auxin responsive SAUR protein [Uniprot/SPTREMBL Acc. A0A118K2C0]	6.27921	1.18905e-06	6.94921e-06	0	2.07933
Ccrd_010753	Fe2OG dioxygenase domain-containing protein [Uniprot/SPTREMBL Acc. A0A118K6L3]	6.2819	8.90593e-152	4.30579e-148	0.699582	58.6592
Ccrd_000734		6.2834	1.58054e-23	5.38133e-22	0.405957	35.7648
Ccrd_004777		6.28619	6.89296e-37	5.14683e-35	0.127232	12.2327
Ccrd_004373	Uncharacterized protein [Uniprot/SPTREMBL Acc. A0A103XMP6]	6.29048	6.93061e-83	3.04616e-80	0.208447	17.8577
Ccrd_019387	Zinc/iron permease [Uniprot/SPTREMBL Acc. A0A118K151]	6.29247	9.5855e-08	6.80771e-07	0	0.479827
Ccrd_024019	Non-heme dioxygenase N-terminal domain-containing protein [Uniprot/SPTREMBL Acc. A0A103XCT4]	6.29598	3.77128e-06	2.0203e-05	0	0.720532
Ccrd_019730	3-ketoacyl-CoA synthase [Uniprot/SPTREMBL Acc. A0A103Y3S1]	6.29794	3.00478e-06	1.63199e-05	0	0.423247
Ccrd_016933		6.34004	9.73692e-08	6.90764e-07	0	1.39141
Ccrd_014434	Cytochrome P450 [Uniprot/SPTREMBL Acc. A0A103YDP7]	6.34961	9.93718e-07	5.89856e-06	0	0.480648
Ccrd_014539	BHLH domain-containing protein [Uniprot/SPTREMBL Acc. A0A103YDJ1]	6.35152	1.05257e-27	4.84657e-26	0.262032	23.4589
Ccrd_025585	Uncharacterized protein [Uniprot/SPTREMBL Acc. A0A124S5S1]	6.367	1.25079e-14	2.02759e-13	0.0299156	3.33233
Ccrd_021597	Nodulin-like domain-containing protein [Uniprot/SPTREMBL Acc. A0A124SEH9]	6.36954	1.09441e-93	5.87911e-91	0.174218	15.5843
Ccrd_014976	BHLH domain-containing protein [Uniprot/SPTREMBL Acc. A0A103YCP9]	6.4132	5.28757e-40	4.60614e-38	0.0899384	9.08798
Ccrd_017518	Isocitrate lyase [Uniprot/SPTREMBL Acc. A0A103Y7Y4]	9.88156	6.48072e-26	2.60022e-24	0	4.29095
Ccrd_022793	Lipase_GDSL domain-containing protein [Uniprot/SPTREMBL Acc. A0A118JZ14]	10.1113	4.51903e-34	3.00321e-32	0	7.89809
Ccrd_020048	tRNA isopentenyltransferase [Uniprot/SPTREMBL Acc. A0A103Y373]	6.41987	1.49406e-05	7.1821e-05	0	0.716951
Ccrd_026578		6.42786	3.14809e-06	1.7044e-05	0	2.11218
Ccrd_025176	Glycosyltransferase [Uniprot/SPTREMBL Acc. A0A103XB96]	6.43303	4.84185e-07	3.03522e-06	0	0.499615
Ccrd_016576	Protein kinase domain-containing protein [Uniprot/SPTREMBL Acc. A0A118K2Y5]	6.43534	3.22362e-36	2.33489e-34	0.133266	12.3927
Ccrd_012688	Phytosulfokine-beta [Uniprot/SPTREMBL Acc. A0A124SHA3]	6.45012	1.29916e-24	4.76747e-23	0.340826	31.3129
Ccrd_011818	Mannose-binding lectin [Uniprot/SPTREMBL Acc. A0A103YIP0]	10.101	8.35442e-51	1.19679e-48	0	6.08362
Ccrd_006037		10.282	5.90448e-29	3.01284e-27	0.561083	749.462
Ccrd_003581	STAS domain-containing protein [Uniprot/SPTREMBL Acc. A0A103XP57]	9.85835	2.08736e-70	5.68557e-68	0.0220777	24.8926
Ccrd_007674		9.83786	3.21022e-33	2.03549e-31	0	5.38609
Ccrd_022173	3-ketoacyl-CoA synthase [Uniprot/SPTREMBL Acc. A0A118JZY7]	8.37059	7.92905e-44	8.02827e-42	0.0336706	13.0478
Ccrd_007151	PLAT domain-containing protein [Uniprot/SPTREMBL Acc. A0A103XHN3]	9.82537	6.53825e-19	1.61899e-17	0	17.0927
Ccrd_008017	Glycoside hydrolase, family 28 [Uniprot/SPTREMBL Acc. A0A103XFY9]	9.8218	8.88227e-34	5.80318e-32	0.431593	402.475
Ccrd_015430	Alpha-galactosidase [Uniprot/SPTREMBL Acc. A0A103YBX7]	7.73158	4.4299e-64	9.96161e-62	0.0664921	15.9823
Ccrd_021860	Cytochrome P450 [Uniprot/SPTREMBL Acc. A0A118JZG7]	9.7513	3.51966e-26	1.44515e-24	0	4.85494
Ccrd_001610	Hexosyltransferase [Uniprot/SPTREMBL Acc. A0A103XSY6]	5.95317	1.74937e-31	1.00988e-29	0.94801	63.07
Ccrd_007846	DOG1 domain-containing protein [Uniprot/SPTREMBL Acc. A0A103XG66]	5.9427	3.53629e-06	1.90179e-05	0	0.708159
Ccrd_006808		5.93237	4.77442e-49	6.23868e-47	0.0159811	1.10678
Ccrd_012030	PlsC domain-containing protein [Uniprot/SPTREMBL Acc. A0A103YI82]	5.92014	3.04845e-45	3.22153e-43	0.142838	9.68337
Ccrd_000012		5.91649	8.28196e-37	6.13659e-35	1.23682	79.4859
Ccrd_020903	Peptidase A1 domain-containing protein [Uniprot/SPTREMBL Acc. A0A118K037]	5.91476	6.51146e-09	5.54248e-08	0.0164342	1.31688
Ccrd_006699	Fe2OG dioxygenase domain-containing protein [Uniprot/SPTREMBL Acc. A0A103XIC3]	5.9122	2.07234e-15	3.65332e-14	0.013336	1.22471
Ccrd_018507	Transcription factor, K-box [Uniprot/SPTREMBL Acc. A0A118K1P5]	5.90793	2.2179e-25	8.56127e-24	0.0492315	3.37325
Ccrd_015575	Non-specific serine/threonine protein kinase [Uniprot/SPTREMBL Acc. A0A118K3K5]	5.89549	4.37533e-31	2.47411e-29	0.704414	43.0248
Ccrd_005687	Peroxidase [Uniprot/SPTREMBL Acc. A0A103XKI3]	5.88813	3.05903e-30	1.66176e-28	0.0549099	3.80506
Ccrd_006964		5.88386	6.01706e-24	2.11571e-22	0.015082	1.18572
Ccrd_018918	Glycosyl transferase, family 14 [Uniprot/SPTREMBL Acc. A0A103Y5C0]	5.87281	4.878e-07	3.05491e-06	0.0226259	1.8455
Ccrd_003835		5.86848	9.47279e-38	7.44692e-36	1.01626	62.9192
Ccrd_024126		5.85391	5.06122e-16	9.41144e-15	0.104207	8.48284
Ccrd_017825	NAC domain-containing protein [Uniprot/SPTREMBL Acc. A0A103Y7B9]	5.85201	7.34443e-12	8.90495e-11	0.0450828	3.02342
Ccrd_017573	Uncharacterized protein [Uniprot/SPTREMBL Acc. A0A103Y7U2]	5.83429	0.000122293	0.000487531	0	0.685224
Ccrd_022172	Protein kinase domain-containing protein [Uniprot/SPTREMBL Acc. A0A118JZ67]	5.82951	4.41521e-79	1.67392e-76	0.100643	6.26893
Ccrd_001026	Dof-type domain-containing protein [Uniprot/SPTREMBL Acc. A0A103XU58]	5.81756	1.03072e-12	1.37186e-11	0.0332575	2.63575
Ccrd_012815	HMA domain-containing protein [Uniprot/SPTREMBL Acc. A0A124SH88]	5.7841	6.43134e-15	1.07406e-13	0.0587393	4.38534
Ccrd_012864		5.77144	2.53946e-05	0.000116431	0	0.873717
Ccrd_022182	Protein kinase domain-containing protein [Uniprot/SPTREMBL Acc. A0A103XZ66]	5.76471	4.27409e-81	1.75865e-78	0.69901	40.2865
Ccrd_021142	Uncharacterized protein [Uniprot/SPTREMBL Acc. A0A103Y1A0]	5.75955	4.94061e-54	8.02911e-52	0.129115	7.47534
Ccrd_013270	Glycosyltransferase [Uniprot/SPTREMBL Acc. A0A124SH41]	5.73715	2.71195e-35	1.88656e-33	0.0729828	4.34385
Ccrd_006280	Chlorophyll A-B binding protein [Uniprot/SPTREMBL Acc. A0A103XJ22]	5.73342	3.51861e-113	3.78036e-110	1.56566	90.0889
Ccrd_003745	AAI domain-containing protein [Uniprot/SPTREMBL Acc. A0A118JW53]	5.72717	9.62206e-36	6.86646e-34	21.1788	1198.46
Ccrd_020473		5.71736	1.01793e-35	7.23739e-34	0.289754	16.4094
Ccrd_025934	PfkB domain-containing protein [Uniprot/SPTREMBL Acc. A0A103TDI5]	5.7134	1.04845e-19	2.75863e-18	0.0758788	4.67449
Ccrd_008967		5.70331	7.03709e-28	3.31928e-26	0.310337	18.1523
Ccrd_014167	Aquaporin-like protein [Uniprot/SPTREMBL Acc. A0A118K4G2]	5.7025	2.04524e-39	1.69755e-37	0.950082	52.8501
Ccrd_016140	Uncharacterized protein [Uniprot/SPTREMBL Acc. A0A103YAJ5]	5.70128	2.25683e-13	3.19977e-12	0.0370843	2.63665
Ccrd_004514	Peroxidase [Uniprot/SPTREMBL Acc. A0A103XMI9]	5.68904	1.01208e-17	2.24456e-16	0.0350688	2.19072
Ccrd_001427	Bet_v_1 domain-containing protein [Uniprot/SPTREMBL Acc. A0A118JXN8]	5.67811	1.60791e-28	7.91232e-27	3.80281	198.633
Ccrd_020565	FAD-binding PCMH-type domain-containing protein [Uniprot/SPTREMBL Acc. A0A103Y258]	5.6705	2.07373e-28	1.00763e-26	0.0594223	3.42384
Ccrd_006263	Zinc finger, LSD1-type [Uniprot/SPTREMBL Acc. A0A103XJA6]	5.63247	3.59189e-33	2.26265e-31	0.249258	13.5689
Ccrd_025724	DUF4378 domain-containing protein [Uniprot/SPTREMBL Acc. A0A118J1Z6]	5.62973	4.24648e-16	7.94223e-15	0.0136278	0.898468
Ccrd_020677	GMC_OxRdtase_N domain-containing protein [Uniprot/SPTREMBL Acc. A0A118K088]	5.60496	2.36215e-12	3.02928e-11	0.0137544	1.0171
Ccrd_018321		5.58826	3.93744e-13	5.41196e-12	0.220474	11.0512
Ccrd_000953	Homeodomain-containing protein [Uniprot/SPTREMBL Acc. A0A118JY59]	5.58798	1.20747e-12	1.59831e-11	0.0128006	0.841614
Ccrd_010083	Uncharacterized protein [Uniprot/SPTREMBL Acc. A0A118K715]	5.58371	1.54363e-10	1.62241e-09	0.0161658	1.1846
Ccrd_015666		5.56584	2.29063e-28	1.10746e-26	5.10409	251.232
Ccrd_010007	AP2/ERF domain-containing protein [Uniprot/SPTREMBL Acc. A0A124SI48]	5.52211	7.79027e-12	9.42189e-11	0.0587633	3.30248
Ccrd_013260	Extensin repeat-containing protein [Uniprot/SPTREMBL Acc. A0A103YFZ1]	5.51229	1.9732e-114	2.38499e-111	0.562546	27.2959
Ccrd_016223	Pectinesterase [Uniprot/SPTREMBL Acc. A0A118K352]	5.50302	1.03949e-47	1.25641e-45	0.675903	32.4072
Ccrd_008661	Costunolide synthase [Uniprot/SPTREMBL Acc. A0A059WM97]	5.50116	7.98871e-33	4.95172e-31	0.109104	5.5028
Ccrd_012072	Cytochrome P450 [Uniprot/SPTREMBL Acc. A0A103YI78]	5.49675	6.00462e-14	8.99484e-13	0.150164	7.4342
Ccrd_000239	STAS domain-containing protein [Uniprot/SPTREMBL Acc. A0A103XVH3]	5.47078	6.9846e-40	6.05719e-38	0.228456	10.827
Ccrd_008675	Uncharacterized protein [Uniprot/SPTREMBL Acc. A0A118JST7]	5.4554	6.73591e-37	5.04906e-35	0.824762	38.3079
Ccrd_025177	Glycosyltransferase [Uniprot/SPTREMBL Acc. A0A103XB92]	5.45499	6.04126e-13	8.17007e-12	0.0695228	3.41564
Ccrd_005983		5.44503	6.42859e-47	7.40015e-45	0.127097	5.89964
Ccrd_000216	Uncharacterized protein family Cys-rich [Uniprot/SPTREMBL Acc. A0A103XVK6]	5.432	1.21731e-08	9.94154e-08	0.0487459	2.59324
Ccrd_015518	CASP-like protein [Uniprot/SPTREMBL Acc. A0A103YBP4]	5.43151	2.34855e-13	3.32251e-12	0.107217	5.22591
Ccrd_008375	Fe2OG dioxygenase domain-containing protein [Uniprot/SPTREMBL Acc. A0A118JTI1]	5.40223	4.37286e-17	9.0349e-16	0.0993493	4.91247
Ccrd_014621	Uncharacterized protein [Uniprot/SPTREMBL Acc. A0A118K467]	5.39759	1.00934e-64	2.32377e-62	0.463769	21.6637
Ccrd_014225	Transcription repressor [Uniprot/SPTREMBL Acc. A0A118K4E5]	5.3956	2.3287e-10	2.39419e-09	0.0288433	1.6597
Ccrd_019072		5.39199	3.57027e-46	3.99107e-44	5.51725	244.456
Ccrd_008537		5.38215	3.58208e-22	1.10838e-20	1.19064	51.5572
Ccrd_009491	Glucose/ribitol dehydrogenase [Uniprot/SPTREMBL Acc. A0A103YN04]	5.36439	1.03395e-27	4.77223e-26	5.20667	222.519
Ccrd_020523	Arabinogalactan peptide, AGP [Uniprot/SPTREMBL Acc. A0A103Y2C9]	5.32794	3.2898e-20	9.01152e-19	0.13681	6.34045
Ccrd_005904	Callose synthase [Uniprot/SPTREMBL Acc. A0A103XJY7]	5.32735	1.11614e-24	4.12716e-23	0.0256111	1.19632
Ccrd_019052		5.28616	3.23245e-13	4.50053e-12	0.0401361	1.85559
Ccrd_014579	Expansin [Uniprot/SPTREMBL Acc. A0A103YDF3]	5.27905	1.69147e-14	2.69622e-13	0.0889608	3.92809
Ccrd_022159	Non-reducing end alpha-L-arabinofuranosidase [Uniprot/SPTREMBL Acc. A0A118JZB3]	5.27218	8.64274e-40	7.46169e-38	0.38752	15.6722
Ccrd_016948	Homeodomain-containing protein [Uniprot/SPTREMBL Acc. A0A118K2P7]	5.26617	3.96796e-72	1.23768e-69	0.275434	11.4202
Ccrd_000595	EF-hand domain-containing protein [Uniprot/SPTREMBL Acc. A0A118JYL8]	5.26541	3.57728e-10	3.60506e-09	0.130023	6.12574
Ccrd_021136		5.25293	3.915e-09	3.44616e-08	0.0130208	0.754831
Ccrd_010751		5.24826	3.90092e-16	7.34566e-15	0.0471639	2.16109
Ccrd_006684	Plus3 domain-containing protein [Uniprot/SPTREMBL Acc. A0A124SBP6]	5.23386	2.78715e-19	7.0643e-18	0.0379726	1.63919
Ccrd_006149		5.21875	1.03082e-06	6.10006e-06	0.172565	8.11499
Ccrd_016849	AP2/ERF domain-containing protein [Uniprot/SPTREMBL Acc. A0A124SG00]	5.21693	1.54662e-27	7.02116e-26	0.875202	34.3504
Ccrd_006310	Cytochrome P450 [Uniprot/SPTREMBL Acc. A0A103XIZ8]	5.18238	5.17738e-20	1.3887e-18	0.0798121	3.32917
Ccrd_002963	Uncharacterized protein [Uniprot/SPTREMBL Acc. A0A103XQH6]	5.17435	1.93739e-20	5.39873e-19	0.347231	13.4447
Ccrd_026163		5.16313	6.93446e-08	5.03588e-07	0.0314757	1.53345
Ccrd_018774	Fe2OG dioxygenase domain-containing protein [Uniprot/SPTREMBL Acc. A0A103Y5K1]	5.1416	1.96168e-23	6.64396e-22	0.211293	8.11154
Ccrd_024373		5.14038	4.94903e-32	2.91796e-30	7.47829	273.238
Ccrd_020367		5.13997	3.03767e-44	3.14147e-42	0.531757	20.0369
Ccrd_022533	NAC domain-containing protein [Uniprot/SPTREMBL Acc. A0A103XYH1]	5.1272	9.06961e-56	1.55219e-53	0.487693	18.5019
Ccrd_016934	Cytochrome P450 [Uniprot/SPTREMBL Acc. A0A103Y910]	5.10715	1.08932e-14	1.77775e-13	0.171776	6.18144
Ccrd_006190		5.09128	6.46537e-08	4.73254e-07	0.0579289	2.09843
Ccrd_007379	TF-B3 domain-containing protein [Uniprot/SPTREMBL Acc. A0A103XH07]	5.08937	1.24501e-22	3.97972e-21	0.126292	5.19925
Ccrd_010523	Oxidored_FMN domain-containing protein [Uniprot/SPTREMBL Acc. A0A118K6R7]	5.07792	2.28208e-67	5.58647e-65	0.596283	21.781
Ccrd_002344	Peroxidase [Uniprot/SPTREMBL Acc. A0A118JWK1]	5.07345	5.7328e-08	4.2251e-07	0.0276539	1.26573
Ccrd_021302	Auxin responsive SAUR protein [Uniprot/SPTREMBL Acc. A0A103Y0U0]	5.0565	8.91584e-13	1.19159e-11	0.0727025	2.9841
Ccrd_015401	Cysteine peptidase, asparagine active site-containing protein [Uniprot/SPTREMBL Acc. A0A103YBX9]	5.02876	9.14304e-33	5.61325e-31	0.13885	5.01208
Ccrd_000418	Xyloglucan endotransglucosylase/hydrolase [Uniprot/SPTREMBL Acc. A0A118JYH9]	5.01456	2.67124e-48	3.26956e-46	13.8418	481.292
Ccrd_018328		5.00975	1.28489e-08	1.0445e-07	0.0310019	1.51842
Ccrd_004014		5.00247	2.27239e-07	1.50912e-06	0.165855	5.95757
Ccrd_002846		4.99893	2.02668e-33	1.29781e-31	1.23292	41.807
Ccrd_002478	GMC_OxRdtase_N domain-containing protein [Uniprot/SPTREMBL Acc. A0A103XRB3]	4.98109	5.77528e-06	2.99593e-05	0.0113984	0.480455
Ccrd_018515	Heme peroxidase [Uniprot/SPTREMBL Acc. A0A103Y633]	4.97244	1.30337e-30	7.18114e-29	1.43926	47.1571
Ccrd_005232		4.95674	3.54769e-13	4.90413e-12	0.0495601	2.04529
Ccrd_006764	Pectinesterase [Uniprot/SPTREMBL Acc. A0A118JTY2]	4.94111	2.49708e-17	5.29507e-16	0.163252	5.51153
Ccrd_017570	Auxin responsive SAUR protein [Uniprot/SPTREMBL Acc. A0A103Y7U9]	4.90726	1.63827e-12	2.13207e-11	0.162571	5.75277
Ccrd_013290	Transcription repressor [Uniprot/SPTREMBL Acc. A0A103YFW5]	4.90052	2.59539e-13	3.65566e-12	0.0540486	2.14183
Ccrd_006024	O-fucosyltransferase family protein [Uniprot/SPTREMBL Acc. A0A103XJH7]	4.87336	3.64116e-24	1.2992e-22	0.115751	3.87605
Ccrd_015949		4.87228	1.16609e-30	6.46158e-29	0.749277	23.1063
Ccrd_018947	Metallopeptidase, catalytic domain-containing protein [Uniprot/SPTREMBL Acc. A0A103Y596]	4.82344	8.37868e-42	7.79016e-40	0.682213	20.7012
Ccrd_012444	MFS domain-containing protein [Uniprot/SPTREMBL Acc. A0A118K5J3]	4.81734	7.22237e-25	2.6912e-23	0.203895	6.31825
Ccrd_016947	Uncharacterized protein [Uniprot/SPTREMBL Acc. A0A103Y926]	4.81367	1.6147e-28	7.92553e-27	0.208678	6.26095
Ccrd_015103		4.80774	3.10889e-35	2.14725e-33	2.93916	91.4514
Ccrd_016432	Bulb-type lectin domain-containing protein [Uniprot/SPTREMBL Acc. A0A103YA32]	4.79415	1.07581e-15	1.94258e-14	1.15594	32.969
Ccrd_001131	PMR5N domain-containing protein [Uniprot/SPTREMBL Acc. A0A103XTW1]	4.79407	1.06334e-11	1.26938e-10	2.5522	72.2699
Ccrd_007972	Photolyase/cryptochrome alpha/beta domain-containing protein [Uniprot/SPTREMBL Acc. A0A103XFZ7]	4.79196	8.24289e-18	1.8493e-16	0.0724786	2.2784
Ccrd_004987	AP2/ERF domain-containing protein [Uniprot/SPTREMBL Acc. A0A103XLH8]	4.79037	3.26149e-14	5.04592e-13	0.113858	3.60273
Ccrd_025507	Protein kinase domain-containing protein [Uniprot/SPTREMBL Acc. A0A103WW27]	4.78033	2.5874e-22	8.08364e-21	0.0146679	0.477708
Ccrd_006188	Cellulose synthase [Uniprot/SPTREMBL Acc. A0A103XJJ5]	4.77273	2.19299e-06	1.22502e-05	0.0158411	0.58471
Ccrd_016549	Calcium-binding EF-hand [Uniprot/SPTREMBL Acc. A0A118K300]	4.75984	3.6586e-21	1.0704e-19	5.4453	153.322
Ccrd_020190	Fe2OG dioxygenase domain-containing protein [Uniprot/SPTREMBL Acc. A0A103Y2Y6]	4.74667	1.33192e-08	1.0782e-07	0.0257926	0.941443
Ccrd_026838	FAD-binding PCMH-type domain-containing protein [Uniprot/SPTREMBL Acc. A0A103J3T9]	4.74583	3.37271e-47	3.97713e-45	3.82514	108.744
Ccrd_013352	Protein kinase domain-containing protein [Uniprot/SPTREMBL Acc. A0A103YFT3]	4.73278	1.81039e-70	5.07409e-68	3.43086	95.7359
Ccrd_006765	Pectinesterase [Uniprot/SPTREMBL Acc. A0A118JTX1]	4.72719	9.00366e-33	5.54528e-31	37.2195	1045.04
Ccrd_005255		4.72613	9.52284e-18	2.11681e-16	0.13232	3.83478
Ccrd_007556	BHLH domain-containing protein [Uniprot/SPTREMBL Acc. A0A124SBE8]	4.71795	4.99439e-10	4.91035e-09	0.0587393	1.82305
Ccrd_020114		4.71744	2.7098e-61	5.24049e-59	0.0644307	1.81377
Ccrd_013598	Uncharacterized protein [Uniprot/SPTREMBL Acc. A0A103YFB4]	4.70992	3.3025e-10	3.34382e-09	0.907186	25.7898
Ccrd_013661	Fe2OG dioxygenase domain-containing protein [Uniprot/SPTREMBL Acc. A0A103YF67]	4.69791	2.12495e-109	2.05472e-106	1.65771	46.3275
Ccrd_000768	Cytochrome P450 [Uniprot/SPTREMBL Acc. A0A124SDJ5]	4.69667	5.14318e-33	3.20851e-31	3.28702	88.744
Ccrd_026635	ANK_REP_REGION domain-containing protein [Uniprot/SPTREMBL Acc. A0A103XD75]	4.69031	2.44158e-05	0.000112263	0.0329582	0.971426
Ccrd_016142	NAC domain-containing protein [Uniprot/SPTREMBL Acc. A0A118K390]	4.66485	2.82145e-24	1.0142e-22	12.7918	333.987
Ccrd_011623		4.66386	7.22472e-17	1.46149e-15	0.0381171	1.11887
Ccrd_022806	Cytochrome P450 [Uniprot/SPTREMBL Acc. A0A118JYR8]	4.66284	1.41914e-108	1.24749e-105	2.03968	55.8028
Ccrd_004502	Fn3_like domain-containing protein [Uniprot/SPTREMBL Acc. A0A124SCD3]	4.64851	2.5973e-22	8.10147e-21	9.33977	241.231
Ccrd_013023	RING-type E3 ubiquitin transferase [Uniprot/SPTREMBL Acc. A0A103YGB9]	4.6226	1.24144e-06	7.21837e-06	0.0163503	0.614717
Ccrd_001956	Phytocyanin domain-containing protein [Uniprot/SPTREMBL Acc. A0A118JXB1]	4.61644	5.97713e-22	1.82898e-20	0.266047	7.24717
Ccrd_020905		4.61058	9.39353e-14	1.37936e-12	0.0732419	2.2522
Ccrd_016202	Uncharacterized protein [Uniprot/SPTREMBL Acc. A0A118K371]	4.59983	1.68499e-41	1.54436e-39	0.349979	9.38466
Ccrd_026593	CASP-like protein [Uniprot/SPTREMBL Acc. A0A103XD63]	4.59298	5.5153e-26	2.22673e-24	0.75824	18.9879
Ccrd_001788	WRKY domain-containing protein [Uniprot/SPTREMBL Acc. A0A118JXM0]	4.57025	2.22465e-26	9.29213e-25	0.170513	4.43187
Ccrd_024214	Uncharacterized protein [Uniprot/SPTREMBL Acc. A0A103XDX6]	4.56581	2.31114e-21	6.8029e-20	0.247921	6.41618
Ccrd_017723	TspO/MBR-related protein [Uniprot/SPTREMBL Acc. A0A118K290]	4.56559	1.14769e-07	8.05045e-07	0.0404949	1.32645
Ccrd_004726	AB hydrolase-1 domain-containing protein [Uniprot/SPTREMBL Acc. A0A103XLW4]	4.56167	6.20414e-12	7.58898e-11	0.374478	9.16114
Ccrd_019073		4.56147	1.91151e-26	8.03624e-25	0.159392	4.16475
Ccrd_012257	MADS-box domain-containing protein [Uniprot/SPTREMBL Acc. A0A103YHS3]	4.55803	4.05539e-07	2.58154e-06	0.0333996	1.09815
Ccrd_012152	Exostosin domain-containing protein [Uniprot/SPTREMBL Acc. A0A103YHZ2]	4.55506	5.97725e-19	1.48388e-17	0.116871	2.90141
Ccrd_013008		4.549	0.000382374	0.00136334	0.17051	4.93377
Ccrd_013540	Uncharacterized protein [Uniprot/SPTREMBL Acc. A0A103YFE9]	4.5428	4.44282e-05	0.0001936	0.214362	5.86691
Ccrd_015719		4.53983	1.80405e-13	2.58816e-12	0.207049	5.00547
Ccrd_021059	Protein DETOXIFICATION [Uniprot/SPTREMBL Acc. A0A118K0G1]	4.52714	2.75084e-24	9.9066e-23	0.850643	20.175
Ccrd_021946	Concanavalin A-like lectin/glucanase, subgroup [Uniprot/SPTREMBL Acc. A0A103XZM1]	4.5105	7.19784e-11	7.82457e-10	0.00605745	0.166456
Ccrd_016886	RING-type domain-containing protein [Uniprot/SPTREMBL Acc. A0A103Y940]	4.50212	1.7352e-42	1.67785e-40	0.888704	21.362
Ccrd_000273	Protein kinase domain-containing protein [Uniprot/SPTREMBL Acc. A0A103XVG2]	4.49888	4.02675e-46	4.4499e-44	0.345543	8.54533
Ccrd_022863	RING-type domain-containing protein [Uniprot/SPTREMBL Acc. A0A103XY23]	4.47227	1.76082e-20	4.928e-19	0.217294	5.28375
Ccrd_018772		4.45306	8.9931e-24	3.10567e-22	2.71117	65.1086
Ccrd_026278	Auxin-responsive protein [Uniprot/SPTREMBL Acc. A0A124RB74]	4.4514	2.41465e-15	4.23748e-14	0.119552	2.9569
Ccrd_022097	BHLH domain-containing protein [Uniprot/SPTREMBL Acc. A0A103XZE7]	4.44299	1.01837e-36	7.5169e-35	0.938434	21.3869
Ccrd_014439	VQ domain-containing protein [Uniprot/SPTREMBL Acc. A0A103YDP9]	4.43195	1.3985e-09	1.30152e-08	0.0669316	1.75509
Ccrd_011568		4.4201	1.51397e-05	7.2688e-05	0.0273908	0.830145
Ccrd_006547	NAC domain-containing protein [Uniprot/SPTREMBL Acc. A0A103XIK8]	4.41623	8.60789e-07	5.165e-06	0.0152696	0.490396
Ccrd_010946		4.40984	1.2559e-14	2.03416e-13	0.908838	20.2549
Ccrd_006760		4.39917	1.66118e-12	2.16014e-11	0.160992	3.87705
Ccrd_008535	ALOG domain-containing protein [Uniprot/SPTREMBL Acc. A0A103XEX6]	4.39655	2.32241e-22	7.27926e-21	0.597864	13.721
Ccrd_003438	Hexosyltransferase [Uniprot/SPTREMBL Acc. A0A118JWI8]	4.3926	2.22184e-21	6.56002e-20	0.18661	4.35748
Ccrd_015426		4.39163	8.10577e-28	3.78641e-26	22.1883	483.18
Ccrd_021520		4.38645	1.03693e-06	6.12499e-06	0.0441554	1.26745
Ccrd_014891	Pleckstrin homology domain-containing protein [Uniprot/SPTREMBL Acc. A0A103YCW2]	4.37855	2.16414e-09	1.96305e-08	0.0180056	0.46471
Ccrd_007253		4.36429	8.10855e-22	2.45401e-20	1.318	28.3009
Ccrd_004491	NAC domain-containing protein [Uniprot/SPTREMBL Acc. A0A124SCD5]	4.35346	1.22761e-11	1.45648e-10	0.0618099	1.48488
Ccrd_007150	Lipoxygenase [Uniprot/SPTREMBL Acc. A0A103XHR6]	4.35059	2.36282e-19	6.02037e-18	2.01128	44.6055
Ccrd_014523	CNNM transmembrane domain-containing protein [Uniprot/SPTREMBL Acc. A0A103YDJ9]	4.34833	3.27663e-06	1.76706e-05	0.0153574	0.415322
Ccrd_007861	Cytochrome P450 [Uniprot/SPTREMBL Acc. A0A118JTP4]	4.33784	4.26935e-21	1.24158e-19	0.112689	2.47615
Ccrd_015163	Uncharacterized protein [Uniprot/SPTREMBL Acc. A0A103YCC5]	4.33729	1.08466e-09	1.02423e-08	0.189085	4.50311
Ccrd_002716	Zinc finger, LSD1-type [Uniprot/SPTREMBL Acc. A0A103XQX8]	4.33721	3.51341e-22	1.08887e-20	0.495929	10.4683
Ccrd_016628	PMEI domain-containing protein [Uniprot/SPTREMBL Acc. A0A103Y9H8]	4.33036	1.17142e-32	7.14639e-31	1.60362	34.4449
Ccrd_012755	Abhydrolase_3 domain-containing protein [Uniprot/SPTREMBL Acc. A0A103YGW3]	4.31526	0.000247585	0.000922908	0.0213138	0.628327
Ccrd_015144	Cytochrome P450 [Uniprot/SPTREMBL Acc. A0A124SGI7]	4.2985	2.67156e-06	1.46735e-05	0.0158209	0.441936
Ccrd_016063	Response regulatory domain-containing protein [Uniprot/SPTREMBL Acc. A0A103YAP1]	4.29466	2.23799e-11	2.56857e-10	0.146012	3.15251
Ccrd_012490	Auxin efflux carrier component [Uniprot/SPTREMBL Acc. A0A103YHA4]	4.28212	1.31349e-13	1.90846e-12	0.165491	3.70448
Ccrd_012258	C2H2-type domain-containing protein [Uniprot/SPTREMBL Acc. A0A103YHS2]	4.28008	1.07694e-61	2.19231e-59	0.985464	20.384
Ccrd_023701		4.26768	7.23814e-09	6.11563e-08	0.502043	9.88867
Ccrd_022927	ZF-HD dimerization-type domain-containing protein [Uniprot/SPTREMBL Acc. A0A124SE33]	4.25501	3.97172e-06	2.12121e-05	0.0596095	1.50377
Ccrd_007161		4.25478	2.28021e-36	1.66404e-34	8.51133	176.032
Ccrd_022687		4.24778	7.27816e-29	3.67499e-27	45.5432	897.583
Ccrd_019505		4.2311	2.46456e-15	4.32114e-14	1.57126	31.7681
Ccrd_024542	GMC_OxRdtase_N domain-containing protein [Uniprot/SPTREMBL Acc. A0A118JS59]	4.2268	4.02105e-74	1.38862e-71	11.3431	226.475
Ccrd_021639	Ribulose bisphosphate carboxylase small chain [Uniprot/SPTREMBL Acc. A0A118JZN2]	4.20555	0.000124382	0.000495127	0.0625241	1.40947
Ccrd_015298		4.20159	5.98427e-17	1.21821e-15	2.04457	39.5253
Ccrd_001812		4.19162	2.83696e-45	3.0145e-43	0.787653	15.5676
Ccrd_008524		4.18227	0.00160849	0.00488254	0.0231466	0.55043
Ccrd_016510	DUF4220 domain-containing protein [Uniprot/SPTREMBL Acc. A0A118K2Z6]	4.16641	1.03554e-50	1.46177e-48	0.348037	6.68716
Ccrd_018514	Peroxidase [Uniprot/SPTREMBL Acc. A0A103Y636]	4.16589	1.48481e-26	6.29711e-25	0.655027	12.5311
Ccrd_020303	CCT domain-containing protein [Uniprot/SPTREMBL Acc. A0A124SEX5]	4.15545	1.85152e-23	6.28184e-22	0.2789	5.39108
Ccrd_004297	Peroxidase [Uniprot/SPTREMBL Acc. A0A103XMQ9]	4.15243	1.72254e-70	4.89886e-68	26.5257	498.153
Ccrd_022877	Response regulatory domain-containing protein [Uniprot/SPTREMBL Acc. A0A103XXS3]	4.14512	8.08431e-21	2.30934e-19	0.338142	6.47566
Ccrd_007037	BHLH domain-containing protein [Uniprot/SPTREMBL Acc. A0A103XHQ4]	4.13766	1.0545e-53	1.67155e-51	0.710261	13.6107
Ccrd_019157	Aa_trans domain-containing protein [Uniprot/SPTREMBL Acc. A0A118K1A3]	4.12118	3.24206e-11	3.65161e-10	0.0902524	1.76144
Ccrd_022510		4.11864	2.94038e-42	2.78746e-40	14.2799	262.975
Ccrd_003338	Cytochrome P450 [Uniprot/SPTREMBL Acc. A0A103XPM3]	4.10326	3.8709e-07	2.47305e-06	0.0439127	0.910836
Ccrd_017529	B box-type domain-containing protein [Uniprot/SPTREMBL Acc. A0A103Y7X2]	4.10206	5.83657e-05	0.000248401	0.0279792	0.681954
Ccrd_012299	Homeodomain-like protein [Uniprot/SPTREMBL Acc. A0A103YHQ6]	4.09937	8.62019e-48	1.04847e-45	1.44006	26.8389
Ccrd_014374	Mannan endo-1,4-beta-mannosidase [Uniprot/SPTREMBL Acc. A0A103YDX1]	4.08601	1.62997e-06	9.31499e-06	0.030933	0.658285
Ccrd_006325		4.07698	1.57814e-49	2.17998e-47	1.48172	26.5916
Ccrd_008164	CASP-like protein [Uniprot/SPTREMBL Acc. A0A103XFS7]	4.0766	4.99353e-53	7.72559e-51	23.98	434.33
Ccrd_024679	Lipase_GDSL domain-containing protein [Uniprot/SPTREMBL Acc. A0A103XDW2]	4.05316	6.14651e-29	3.12809e-27	0.942923	16.9719
Ccrd_016221	PMEI domain-containing protein [Uniprot/SPTREMBL Acc. A0A118K360]	4.05213	0.000867611	0.00281759	0.190215	3.53129
Ccrd_001768	ZF-HD dimerization-type domain-containing protein [Uniprot/SPTREMBL Acc. A0A124SD85]	4.02645	2.75958e-13	3.87001e-12	0.155311	2.87279
Ccrd_002429	Peptidase C13, legumain [Uniprot/SPTREMBL Acc. A0A118JXE3]	4.02274	2.13221e-24	7.72189e-23	0.150671	2.61514
Ccrd_002424	Uncharacterized protein [Uniprot/SPTREMBL Acc. A0A103XRE8]	4.00807	3.60847e-27	1.58962e-25	1.10861	18.8112
Ccrd_020228	SHSP domain-containing protein [Uniprot/SPTREMBL Acc. A0A103Y2U1]	4.00509	8.30265e-14	1.22103e-12	2.1052	35.2808
Ccrd_006285	Chlorophyll A-B binding protein [Uniprot/SPTREMBL Acc. A0A124SBT9]	4.00396	1.7514e-29	9.10491e-28	9.28954	162.931
Ccrd_012140		3.99861	1.01046e-07	7.15548e-07	0.0434994	0.82741
Ccrd_018059	Uncharacterized protein [Uniprot/SPTREMBL Acc. A0A103Y6X6]	3.99787	9.40406e-30	4.95545e-28	19.9818	332.366
Ccrd_017303	ATPase_AAA_core domain-containing protein [Uniprot/SPTREMBL Acc. A0A124SFV2]	3.99451	2.64283e-13	3.71708e-12	0.0301193	0.554856
Ccrd_006533	Uncharacterized protein [Uniprot/SPTREMBL Acc. A0A103XIR6]	3.99189	8.01321e-06	4.04606e-05	0.0393764	0.719777
Ccrd_026640	GMC_OxRdtase_N domain-containing protein [Uniprot/SPTREMBL Acc. A0A124QKW4]	3.983	1.49646e-46	1.71243e-44	20.35	344.356
Ccrd_003971	Cytokinin dehydrogenase [Uniprot/SPTREMBL Acc. A0A103XNF9]	3.97397	1.37503e-14	2.21413e-13	0.127677	2.21435
Ccrd_002442		3.96612	1.09889e-16	2.17517e-15	0.102416	1.7829
Ccrd_021730	Cysteine dioxygenase [Uniprot/SPTREMBL Acc. A0A124SEG4]	3.95679	1.81345e-34	1.22196e-32	15.1838	245.512
Ccrd_008404	Uncharacterized protein [Uniprot/SPTREMBL Acc. A0A103XFA5]	3.94942	6.30122e-05	0.000266651	0.15779	2.8392
Ccrd_011631		3.94276	4.76417e-20	1.28321e-18	0.69745	11.9352
Ccrd_022494	Cytochrome P450 [Uniprot/SPTREMBL Acc. A0A103XYH9]	3.93679	4.61469e-07	2.90554e-06	0.0684875	1.13928
Ccrd_004025	IPPc domain-containing protein [Uniprot/SPTREMBL Acc. A0A103XNH7]	3.9347	9.55736e-11	1.02797e-09	0.0736246	1.30121
Ccrd_007242	Exostosin domain-containing protein [Uniprot/SPTREMBL Acc. A0A103XHD3]	3.92979	7.4748e-28	3.51716e-26	0.774288	12.5307
Ccrd_006776	Uncharacterized protein [Uniprot/SPTREMBL Acc. A0A103XI80]	3.92217	7.04952e-15	1.17223e-13	0.120887	2.01376
Ccrd_007470	Uncharacterized protein [Uniprot/SPTREMBL Acc. A0A124SBG3]	3.91907	4.87726e-47	5.68201e-45	1.52803	24.9544
Ccrd_013737	Purple acid phosphatase [Uniprot/SPTREMBL Acc. A0A103YF11]	3.91747	2.12272e-10	2.18707e-09	0.0691445	1.2197
Ccrd_015655	NPH3 domain-containing protein [Uniprot/SPTREMBL Acc. A0A103YBD1]	3.91732	1.45925e-12	1.91196e-11	0.195476	3.19146
Ccrd_002646	Oligopeptide transporter OPT superfamily [Uniprot/SPTREMBL Acc. A0A118JW86]	3.91044	3.94631e-65	9.19491e-63	1.13676	18.0901
Ccrd_022071	Transcription factor, K-box [Uniprot/SPTREMBL Acc. A0A103XZH2]	3.90723	2.67534e-43	2.65326e-41	2.00833	32.7512
Ccrd_017454	Flavin-containing monooxygenase [Uniprot/SPTREMBL Acc. A0A103Y828]	3.9051	2.15949e-08	1.68737e-07	0.0587471	1.01198
Ccrd_012984	GED domain-containing protein [Uniprot/SPTREMBL Acc. A0A118K568]	3.89585	2.00168e-06	1.12695e-05	0.0462472	0.833296
Ccrd_012749	Glycosyltransferase [Uniprot/SPTREMBL Acc. A0A103YGW7]	3.89506	7.14575e-16	1.31112e-14	0.466292	7.26049
Ccrd_018055	Alpha crystallin/Hsp20 domain-containing protein [Uniprot/SPTREMBL Acc. A0A118K216]	3.89413	2.63394e-18	6.18929e-17	2.88439	44.0155
Ccrd_010374		3.89136	2.1569e-12	2.78081e-11	0.142082	2.34039
Ccrd_012233		3.89081	3.92018e-18	9.05763e-17	0.250196	4.08191
Ccrd_020725	Uncharacterized protein [Uniprot/SPTREMBL Acc. A0A103Y1X3]	3.89005	7.83601e-06	3.96599e-05	0.099927	1.83979
Ccrd_012512		3.88998	1.39483e-25	5.44942e-24	8.95574	144.335
Ccrd_008580	Peptidase S8/S53 domain-containing protein [Uniprot/SPTREMBL Acc. A0A118JSM1]	3.88098	9.9076e-31	5.5217e-29	1.82489	28.1276
Ccrd_014534	Protein-serine/threonine phosphatase [Uniprot/SPTREMBL Acc. A0A103YDI7]	3.86597	4.98126e-08	3.71653e-07	0.174784	2.72956
Ccrd_018843	Ribosomal protein S3Ae [Uniprot/SPTREMBL Acc. A0A118K1G2]	3.86301	1.28244e-08	1.04294e-07	0.217098	3.70518
Ccrd_006585	CASP-like protein [Uniprot/SPTREMBL Acc. A0A103XII5]	3.85951	1.29617e-24	4.76551e-23	6.54904	100.603
Ccrd_000058		3.85917	2.55518e-40	2.23596e-38	0.961891	14.9107
Ccrd_015041	Cytochrome P450 [Uniprot/SPTREMBL Acc. A0A103YCL6]	3.8571	4.50094e-79	1.67392e-76	1.26374	19.6694
Ccrd_001107	Lipase_GDSL domain-containing protein [Uniprot/SPTREMBL Acc. A0A103XTV4]	3.85541	2.56433e-08	1.99003e-07	0.270016	4.22281
Ccrd_017577	Auxin responsive SAUR protein [Uniprot/SPTREMBL Acc. A0A103Y7V6]	3.83469	8.35772e-06	4.19927e-05	0.15631	2.76356
Ccrd_000215		3.83133	2.93454e-51	4.29932e-49	133.38	2008.06
Ccrd_004953	Fe2OG dioxygenase domain-containing protein [Uniprot/SPTREMBL Acc. A0A124SC84]	3.83073	6.94202e-05	0.000290903	0.0203214	0.338882
Ccrd_015880	Bidirectional sugar transporter SWEET [Uniprot/SPTREMBL Acc. A0A103YAV1]	3.81925	2.60994e-07	1.71621e-06	0.257261	3.85825
Ccrd_022264	Receptor-like serine/threonine-protein kinase [Uniprot/SPTREMBL Acc. A0A103XZ10]	3.8171	1.65023e-15	2.93595e-14	0.11238	1.73832
Ccrd_011194	Uncharacterized protein [Uniprot/SPTREMBL Acc. A0A118K6B5]	3.81353	3.72878e-20	1.01598e-18	1.99587	30.6283
Ccrd_014329	Chloramphenicol acetyltransferase-like domain-containing protein [Uniprot/SPTREMBL Acc. A0A124SGR8]	3.8074	7.4827e-46	8.17559e-44	1.14416	17.024
Ccrd_004185		3.79712	4.77221e-33	2.98673e-31	10.5358	154.469
Ccrd_008147	Uncharacterized protein [Uniprot/SPTREMBL Acc. A0A118JT84]	3.79192	0.00280911	0.00796209	0.0195846	0.400177
Ccrd_000151	Ribonuclease T2, active site-containing protein [Uniprot/SPTREMBL Acc. A0A103XVS2]	3.78569	9.62033e-16	1.74365e-14	0.299349	4.57489
Ccrd_004478	Peroxidase [Uniprot/SPTREMBL Acc. A0A103XMJ1]	3.78227	1.88929e-27	8.45764e-26	25.5516	385.481
Ccrd_016816	Alcohol dehydrogenase, C-terminal [Uniprot/SPTREMBL Acc. A0A118K2T6]	3.78077	1.17823e-39	1.00744e-37	51.6117	743.987
Ccrd_025922	Peptidase A1 domain-containing protein [Uniprot/SPTREMBL Acc. A0A103TF61]	3.7795	5.66226e-38	4.54367e-36	80.8237	1191.5
Ccrd_007870	Pectate_lyase_3 domain-containing protein [Uniprot/SPTREMBL Acc. A0A103XG53]	3.77784	1.55742e-26	6.5762e-25	16.7824	239.433
Ccrd_002426	Beta-fructofuranosidase [Uniprot/SPTREMBL Acc. A0A118JX29]	3.77782	1.04363e-25	4.11892e-24	0.584983	8.55412
Ccrd_001154		3.75959	5.23543e-37	3.97051e-35	1.32393	19.1692
Ccrd_025659		3.75519	6.48992e-12	7.90855e-11	0.609269	8.9648
Ccrd_011164	Apple-like protein [Uniprot/SPTREMBL Acc. A0A103YJR9]	3.75457	3.13276e-41	2.84434e-39	0.601349	8.60475
Ccrd_011677	RING-type E3 ubiquitin transferase [Uniprot/SPTREMBL Acc. A0A103YIU4]	3.75299	5.25097e-12	6.47218e-11	0.125426	1.7878
Ccrd_020467		3.74828	3.0604e-07	1.98808e-06	0.0743194	1.21645
Ccrd_012129	Uncharacterized protein [Uniprot/SPTREMBL Acc. A0A103YI00]	3.73808	2.40071e-06	1.33182e-05	0.0507501	0.81676
Ccrd_026851	Cytochrome P450 [Uniprot/SPTREMBL Acc. A0A103IM63]	3.72002	2.32988e-94	1.36538e-91	4.0129	56.7994
Ccrd_000052	Exostosin-like protein [Uniprot/SPTREMBL Acc. A0A103XVW2]	3.71971	7.03203e-10	6.80643e-09	0.093369	1.41768
Ccrd_018994	Glucan endo-1,3-beta-D-glucosidase [Uniprot/SPTREMBL Acc. A0A103Y539]	3.71846	6.94243e-22	2.10769e-20	0.268936	3.86711
Ccrd_020387		3.7124	6.01409e-14	9.00205e-13	0.191407	2.69546
Ccrd_005408	Patatin [Uniprot/SPTREMBL Acc. A0A118JVI5]	3.71119	2.1073e-28	1.02138e-26	1.6884	23.3478
Ccrd_024271	TAXi_N domain-containing protein [Uniprot/SPTREMBL Acc. A0A103D5D1]	3.70751	3.1387e-44	3.22869e-42	143.222	2007.55
Ccrd_014749	MLO-like protein [Uniprot/SPTREMBL Acc. A0A118K432]	3.70618	3.22801e-94	1.83607e-91	7.69379	107.658
Ccrd_021592	Homeodomain-like protein [Uniprot/SPTREMBL Acc. A0A103Y0A1]	3.69708	7.60943e-34	5.0054e-32	1.37965	19.1826
Ccrd_007690		3.68545	5.67235e-25	2.12181e-23	2.06154	28.8171
Ccrd_013599	Uncharacterized protein [Uniprot/SPTREMBL Acc. A0A103YFA6]	3.67989	2.92606e-07	1.90593e-06	1.99629	27.1093
Ccrd_019504	WD_REPEATS_REGION domain-containing protein [Uniprot/SPTREMBL Acc. A0A103Y4A7]	3.67492	2.00444e-79	7.75279e-77	2.30515	31.5516
Ccrd_016435	Bulb-type lectin domain-containing protein [Uniprot/SPTREMBL Acc. A0A118K315]	3.67344	4.67777e-14	7.05643e-13	2.79464	36.2769
Ccrd_003643	NAC domain-containing protein [Uniprot/SPTREMBL Acc. A0A118JWI7]	3.66543	1.69254e-14	2.69622e-13	0.46725	6.5125
Ccrd_007838	Major facilitator superfamily domain, general substrate transporter [Uniprot/SPTREMBL Acc. A0A124SBC0]	3.66147	3.83695e-22	1.18535e-20	2.82211	36.9324
Ccrd_022410		3.66004	1.55574e-20	4.37303e-19	1.36724	18.3157
Ccrd_004161	TPT domain-containing protein [Uniprot/SPTREMBL Acc. A0A103XMY8]	3.65653	2.4177e-13	3.41035e-12	0.309016	4.19291
Ccrd_003603	Magnesium transporter [Uniprot/SPTREMBL Acc. A0A103XP97]	3.6532	9.19998e-06	4.58907e-05	0.0345564	0.52695
Ccrd_007766	Fn3_like domain-containing protein [Uniprot/SPTREMBL Acc. A0A118JT20]	3.64574	9.56033e-16	1.7344e-14	2.14297	27.7494
Ccrd_011655	Fe2OG dioxygenase domain-containing protein [Uniprot/SPTREMBL Acc. A0A103YIZ7]	3.63781	1.48517e-23	5.06556e-22	0.442413	5.88548
Ccrd_020534	Fe2OG dioxygenase domain-containing protein [Uniprot/SPTREMBL Acc. A0A103Y2A1]	3.62046	1.46071e-59	2.71622e-57	45.2393	586.462
Ccrd_022490		3.61325	4.26896e-08	3.21736e-07	0.894741	12.391
Ccrd_008510	Glutamate receptor [Uniprot/SPTREMBL Acc. A0A124SB46]	3.61049	1.72632e-14	2.73875e-13	0.0908414	1.23862
Ccrd_008978	Lipase_3 domain-containing protein [Uniprot/SPTREMBL Acc. A0A124SAZ4]	3.606	2.40586e-09	2.16606e-08	0.0755045	1.06321
Ccrd_014762	Peptidase A1 domain-containing protein [Uniprot/SPTREMBL Acc. A0A103YD35]	3.58273	4.15731e-35	2.851e-33	40.299	503.124
Ccrd_010765		3.57925	9.09025e-41	8.06406e-39	6.45095	82.7058
Ccrd_026465	Glycoside hydrolase, catalytic domain-containing protein [Uniprot/SPTREMBL Acc. A0A103PTH6]	3.56715	1.80812e-27	8.11304e-26	11.897	146.266
Ccrd_001055		3.5571	3.428e-23	1.143e-21	3.14818	39.1909
Ccrd_024377	Peroxidase [Uniprot/SPTREMBL Acc. A0A124SAQ4]	3.54636	2.29028e-39	1.89281e-37	54.4481	681.74
Ccrd_019545		3.54344	9.53871e-06	4.74092e-05	0.0349042	0.487039
Ccrd_026266	Non-heme dioxygenase N-terminal domain-containing protein [Uniprot/SPTREMBL Acc. A0A124SAV1]	3.52337	3.96036e-05	0.000174186	0.0890331	1.22122
Ccrd_021301	Auxin responsive SAUR protein [Uniprot/SPTREMBL Acc. A0A103Y0W3]	3.51278	5.24678e-11	5.80477e-10	0.112754	1.47413
Ccrd_009711	Cation transporter [Uniprot/SPTREMBL Acc. A0A118K797]	3.5105	1.19898e-48	1.5155e-46	1.32418	15.9885
Ccrd_011110		3.50914	3.4302e-24	1.22618e-22	20.9122	246.657
Ccrd_020676	GMC_OxRdtase_N domain-containing protein [Uniprot/SPTREMBL Acc. A0A124SET1]	3.5055	5.02423e-25	1.88667e-23	0.469253	5.70192
Ccrd_007892		3.48579	3.77244e-06	2.02036e-05	0.0682017	0.925052
Ccrd_001068	Receptor-like serine/threonine-protein kinase [Uniprot/SPTREMBL Acc. A0A103XU24]	3.47554	1.60877e-06	9.20473e-06	0.0271471	0.355367
Ccrd_006057		3.47103	1.7289e-16	3.35695e-15	7.30017	85.3709
Ccrd_022235	BES1_N domain-containing protein [Uniprot/SPTREMBL Acc. A0A103XZ27]	3.46396	6.64706e-08	4.85085e-07	0.182422	2.31583
Ccrd_017581	Auxin responsive SAUR protein [Uniprot/SPTREMBL Acc. A0A118K2B3]	3.45543	1.26067e-20	3.55913e-19	2.74649	32.3506
Ccrd_005949	Pentatricopeptide repeat-containing protein [Uniprot/SPTREMBL Acc. A0A118JV07]	3.45436	3.58603e-07	2.30323e-06	0.0423874	0.522317
Ccrd_010307	Glutaredoxin domain-containing protein [Uniprot/SPTREMBL Acc. A0A103YLF6]	3.45309	0.00980895	0.0237297	0.0277493	0.404459
Ccrd_006501	Pectin acetylesterase [Uniprot/SPTREMBL Acc. A0A118JU46]	3.44667	0.000702957	0.00234145	0.0259003	0.365337
Ccrd_012234		3.44573	9.00438e-28	4.17592e-26	0.634664	7.42904
Ccrd_024425	Branched-chain-amino-acid aminotransferase [Uniprot/SPTREMBL Acc. A0A103XCH9]	3.44134	4.06684e-21	1.18447e-19	3.7157	41.9181
Ccrd_011609	Major facilitator superfamily domain, general substrate transporter [Uniprot/SPTREMBL Acc. A0A103YIZ8]	3.43939	1.02728e-58	1.8395e-56	2.29213	26.4296
Ccrd_018599	SHSP domain-containing protein [Uniprot/SPTREMBL Acc. A0A118K1N0]	3.43876	4.52789e-23	1.4994e-21	5.93505	66.7973
Ccrd_024172		3.43484	8.57666e-07	5.14946e-06	0.0350629	0.458489
Ccrd_010065	Uncharacterized protein [Uniprot/SPTREMBL Acc. A0A118K712]	3.43463	3.4401e-13	4.76562e-12	0.183691	2.15386
Ccrd_007017	Cytochrome b5 heme-binding domain-containing protein [Uniprot/SPTREMBL Acc. A0A103XHU9]	3.4287	3.01602e-05	0.000135992	0.125911	1.6298
Ccrd_024232	PBPe domain-containing protein [Uniprot/SPTREMBL Acc. A0A118JSL3]	3.42274	7.83838e-14	1.15627e-12	0.515671	5.91978
Ccrd_018057		3.41245	1.12203e-14	1.82958e-13	1.01557	11.7657
Ccrd_019472		3.41216	0.00725165	0.0182509	0.151074	1.90181
Ccrd_005414	Patatin [Uniprot/SPTREMBL Acc. A0A103XKU0]	3.4093	5.41554e-37	4.09106e-35	1.14766	12.9533
Ccrd_014581	RING-type domain-containing protein [Uniprot/SPTREMBL Acc. A0A103YDF6]	3.40427	1.83566e-44	1.91891e-42	4.90456	55.5755
Ccrd_014849	Peptidase C83 domain-containing protein [Uniprot/SPTREMBL Acc. A0A118K414]	3.40111	1.57166e-53	2.47108e-51	2.97825	33.772
Ccrd_002908	UDP-glucuronosyl/UDP-glucosyltransferase [Uniprot/SPTREMBL Acc. A0A103XQI9]	3.39988	1.33967e-24	4.90681e-23	1.73874	20.1259
Ccrd_007241	Xyloglucan endotransglucosylase/hydrolase [Uniprot/SPTREMBL Acc. A0A103XHG8]	3.39529	1.4029e-20	3.95492e-19	1.55713	17.4985
Ccrd_023159	Peroxidase [Uniprot/SPTREMBL Acc. A0A103XX97]	3.39523	2.89604e-32	1.73933e-30	12.1352	135.572
Ccrd_005373	Calcium uniporter protein [Uniprot/SPTREMBL Acc. A0A103XKS6]	3.39114	1.66474e-10	1.74496e-09	0.576339	6.36758
Ccrd_021089	LRRNT_2 domain-containing protein [Uniprot/SPTREMBL Acc. A0A124SEN3]	3.38754	8.25836e-21	2.35558e-19	2.2719	25.6671
Ccrd_002281	Concanavalin A-like lectin/glucanase, subgroup [Uniprot/SPTREMBL Acc. A0A103XRI2]	3.38732	0.000338343	0.00122143	0.0236742	0.325085
Ccrd_006284		3.38355	0.000136779	0.000539169	0.324679	3.84881
Ccrd_005005	Phospholipase D [Uniprot/SPTREMBL Acc. A0A124SC82]	3.37988	3.53727e-07	2.27493e-06	0.0416026	0.510108
Ccrd_006803		3.3779	2.02367e-06	1.13767e-05	0.0661395	0.830171
Ccrd_021256	Protein kinase domain-containing protein [Uniprot/SPTREMBL Acc. A0A103Y0Y7]	3.37578	1.37809e-08	1.11138e-07	0.109347	1.31036
Ccrd_016853	PX domain-containing protein [Uniprot/SPTREMBL Acc. A0A103Y959]	3.37215	5.67955e-10	5.55293e-09	0.379476	4.25817
Ccrd_007127		3.36794	9.32833e-30	4.92898e-28	113.717	1226.17
Ccrd_004479	Peroxidase [Uniprot/SPTREMBL Acc. A0A103XMJ0]	3.3664	2.21766e-05	0.000102971	0.277493	3.23967
Ccrd_013329	AP2/ERF domain-containing protein [Uniprot/SPTREMBL Acc. A0A124SH34]	3.36385	2.4062e-22	7.52969e-21	0.577024	6.46029
Ccrd_017289	Uncharacterized protein [Uniprot/SPTREMBL Acc. A0A124SFU5]	3.35035	5.15206e-08	3.83952e-07	0.0985943	1.13405
Ccrd_005039		3.33165	1.05139e-18	2.54797e-17	0.69362	7.52354
Ccrd_005606	GATA-type domain-containing protein [Uniprot/SPTREMBL Acc. A0A103XKB5]	3.32457	5.83203e-06	3.02131e-05	0.105315	1.30383
Ccrd_006667		3.31879	9.60103e-13	1.28051e-11	8.68656	90.9528
Ccrd_003546		3.31629	7.34621e-10	7.08217e-09	0.151315	1.65583
Ccrd_000376		3.30297	5.52345e-06	2.88074e-05	0.166496	1.85886
Ccrd_024163	Uncharacterized protein [Uniprot/SPTREMBL Acc. A0A103XCW0]	3.30228	0.00111763	0.00353513	0.100629	1.19791
Ccrd_012171	AAI domain-containing protein [Uniprot/SPTREMBL Acc. A0A103YI32]	3.28616	3.86324e-27	1.68648e-25	102.953	1068.76
Ccrd_017320	Acyl-[acyl-carrier-protein] desaturase [Uniprot/SPTREMBL Acc. A0A118HPD5]	3.28401	2.83341e-27	1.25966e-25	33.2755	341.245
Ccrd_011750	Protein-serine/threonine phosphatase [Uniprot/SPTREMBL Acc. A0A103YIU8]	3.28185	4.0324e-21	1.17621e-19	3.76002	38.0858
Ccrd_002150	BTB/POZ fold [Uniprot/SPTREMBL Acc. A0A118JWJ0]	3.28165	9.46697e-43	9.20009e-41	6.8422	70.337
Ccrd_009858	Abhydrolase_3 domain-containing protein [Uniprot/SPTREMBL Acc. A0A103YMD5]	3.27866	8.04334e-09	6.74253e-08	0.114161	1.25485
Ccrd_004918	Aminotran_1_2 domain-containing protein [Uniprot/SPTREMBL Acc. A0A103XLQ0]	3.27788	4.26954e-15	7.26837e-14	0.594525	6.01891
Ccrd_016463	RING-type domain-containing protein [Uniprot/SPTREMBL Acc. A0A103Y9W5]	3.27511	4.6738e-07	2.93654e-06	0.117291	1.31049
Ccrd_002866	Late embryogenesis abundant protein, LEA-14 [Uniprot/SPTREMBL Acc. A0A118JWX7]	3.27508	4.94494e-12	6.12229e-11	0.810057	8.30546
Ccrd_006561	Beta-amylase [Uniprot/SPTREMBL Acc. A0A103XIP2]	3.26847	1.15597e-61	2.32869e-59	2.07106	21.3368
Ccrd_008165	CASP-like protein [Uniprot/SPTREMBL Acc. A0A103XFR0]	3.26244	8.28196e-07	4.99111e-06	0.474692	4.86644
Ccrd_020359	Alpha/beta hydrolase fold-3 [Uniprot/SPTREMBL Acc. A0A124SEW4]	3.25967	5.07324e-13	6.90439e-12	0.226334	2.33614
Ccrd_020588		3.25435	1.12765e-09	1.06172e-08	0.145321	1.53047
Ccrd_008396	SHSP domain-containing protein [Uniprot/SPTREMBL Acc. A0A124SB59]	3.24136	1.16279e-10	1.2376e-09	0.680244	6.73956
Ccrd_024412	Uncharacterized protein [Uniprot/SPTREMBL Acc. A0A103XCJ7]	3.22388	2.33675e-31	1.34096e-29	3.78552	37.3539
Ccrd_024674		3.22092	5.36435e-11	5.93145e-10	0.116776	1.19163
Ccrd_002749	SANT domain-containing protein [Uniprot/SPTREMBL Acc. A0A103XQV4]	3.21285	3.25339e-20	8.93711e-19	1.27058	12.804
Ccrd_006610	CCT domain-containing protein [Uniprot/SPTREMBL Acc. A0A103XIH5]	3.2114	3.24104e-09	2.87648e-08	0.236306	2.3465
Ccrd_016919		3.20404	8.05125e-20	2.13878e-18	0.822378	8.04548
Ccrd_008135		3.20329	1.35242e-05	6.54842e-05	0.0643135	0.657981
Ccrd_011094	NAC domain-containing protein [Uniprot/SPTREMBL Acc. A0A124SHT0]	3.20204	3.66398e-17	7.63552e-16	7.1645	68.7589
Ccrd_008710	Protein kinase domain-containing protein [Uniprot/SPTREMBL Acc. A0A103XEL7]	3.19133	4.07595e-44	4.17062e-42	6.33848	61.9868
Ccrd_000217	Endoglucanase [Uniprot/SPTREMBL Acc. A0A103XVK3]	3.1825	3.02739e-15	5.23673e-14	0.405361	3.93884
Ccrd_025626	Non-specific serine/threonine protein kinase [Uniprot/SPTREMBL Acc. A0A103W875]	3.17425	6.51666e-09	5.54447e-08	0.405398	3.83532
Ccrd_019027	BHLH domain-containing protein [Uniprot/SPTREMBL Acc. A0A103Y540]	3.15705	4.33862e-17	8.97375e-16	3.13014	29.6112
Ccrd_019566	Cupin 1 [Uniprot/SPTREMBL Acc. A0A103Y437]	3.15647	3.40085e-24	1.21795e-22	0.755221	7.23091
Ccrd_014904		3.14792	4.07693e-14	6.1984e-13	0.351485	3.39724
Ccrd_005329	NADH-ubiquinone reductase complex 1 MLRQ subunit [Uniprot/SPTREMBL Acc. A0A103XKU4]	3.14133	9.79066e-19	2.38766e-17	218.389	2044.64
Ccrd_024667		3.13083	4.27704e-07	2.71282e-06	3.33043	33.1863
Ccrd_017578	Uncharacterized protein [Uniprot/SPTREMBL Acc. A0A103Y7T4]	3.12906	6.04113e-09	5.16716e-08	0.911851	8.68448
Ccrd_007884		3.1283	3.27682e-07	2.11799e-06	0.0267267	0.256782
Ccrd_022243	Chloramphenicol acetyltransferase-like domain-containing protein [Uniprot/SPTREMBL Acc. A0A124SEB0]	3.12556	0.00473465	0.0126051	0.0332532	0.343851
Ccrd_010452		3.12093	5.48886e-07	3.4044e-06	0.627933	6.20011
Ccrd_001957	Uncharacterized protein [Uniprot/SPTREMBL Acc. A0A118JX99]	3.11777	0.000111598	0.00044785	0.169902	1.74091
Ccrd_004319	Peroxidase [Uniprot/SPTREMBL Acc. A0A103XMY5]	3.11497	7.71145e-36	5.54393e-34	17.8673	165.837
Ccrd_002414	L-lactate dehydrogenase [Uniprot/SPTREMBL Acc. A0A118JWA8]	3.11462	2.20873e-05	0.000102605	0.0865985	0.867467
Ccrd_014937	Uncharacterized protein [Uniprot/SPTREMBL Acc. A0A118K3Y4]	3.11059	1.89015e-09	1.72586e-08	0.327587	3.1199
Ccrd_001847	Xyloglucan:xyloglucosyl transferase [Uniprot/SPTREMBL Acc. A0A124SD78]	3.10941	4.32199e-28	2.05869e-26	0.789982	7.26813
Ccrd_023080		3.10765	1.29228e-16	2.53721e-15	9.94861	88.5629
Ccrd_011733		3.09827	4.88616e-10	4.80639e-09	0.784294	7.22209
Ccrd_003850	TPP_enzyme_N domain-containing protein [Uniprot/SPTREMBL Acc. A0A103XNR8]	3.09776	3.50888e-05	0.000155817	0.202496	1.95695
Ccrd_019561	Cupin 1 [Uniprot/SPTREMBL Acc. A0A103Y433]	3.09401	6.69813e-06	3.42504e-05	0.0717759	0.70193
Ccrd_000553	Uncharacterized protein [Uniprot/SPTREMBL Acc. A0A103XUX2]	3.09086	6.40322e-08	4.69238e-07	0.24089	2.2557
Ccrd_019484	Glycoside hydrolase, catalytic domain-containing protein [Uniprot/SPTREMBL Acc. A0A118K119]	3.08668	2.38105e-31	1.36234e-29	1.37036	12.2528
Ccrd_003232	VQ domain-containing protein [Uniprot/SPTREMBL Acc. A0A124SCS6]	3.07678	1.41763e-08	1.14089e-07	0.368838	3.41537
Ccrd_001351		3.07568	3.08598e-51	4.48719e-49	6.40347	57.9739
Ccrd_011524	Concanavalin A-like lectin/glucanase superfamily [Uniprot/SPTREMBL Acc. A0A103YJC4]	3.07327	9.57782e-19	2.34166e-17	0.423752	3.84243
Ccrd_013181	Glycoside hydrolase, catalytic domain-containing protein [Uniprot/SPTREMBL Acc. A0A118K546]	3.05183	1.38035e-09	1.28587e-08	0.248918	2.17913
Ccrd_016861		3.04246	1.22178e-12	1.61503e-11	1.61311	14.6123
Ccrd_004831	Fe2OG dioxygenase domain-containing protein [Uniprot/SPTREMBL Acc. A0A118JV58]	3.03536	6.11403e-52	9.16583e-50	4.77525	41.8147
Ccrd_021865	Major facilitator superfamily domain, general substrate transporter [Uniprot/SPTREMBL Acc. A0A103XZS1]	3.03256	1.69635e-48	2.11649e-46	2.59326	22.4405
Ccrd_008915	PlsC domain-containing protein [Uniprot/SPTREMBL Acc. A0A118JT32]	3.02987	3.27534e-11	3.68695e-10	0.181799	1.63534
Ccrd_017142	Uncharacterized protein [Uniprot/SPTREMBL Acc. A0A103Y8N8]	3.02941	9.12579e-24	3.14588e-22	2.17442	18.7224
Ccrd_007601	HMA domain-containing protein [Uniprot/SPTREMBL Acc. A0A103XGR4]	3.02707	1.39679e-22	4.45018e-21	3.11693	26.7718
Ccrd_011059		3.02469	1.50441e-21	4.48286e-20	1.79248	15.482
Ccrd_019589	Fe2OG dioxygenase domain-containing protein [Uniprot/SPTREMBL Acc. A0A103Y412]	3.01923	8.47262e-09	7.07784e-08	0.34169	3.06854
Ccrd_012903		3.01741	1.13027e-34	7.66957e-33	1.53632	13.142
Ccrd_020981		3.0062	9.4745e-19	2.31933e-17	33.1826	275.976
Ccrd_007295	Uncharacterized protein [Uniprot/SPTREMBL Acc. A0A103XH73]	3.00412	2.82983e-09	2.5301e-08	0.0477018	0.432594
Ccrd_024936	ANK_REP_REGION domain-containing protein [Uniprot/SPTREMBL Acc. A0A103XBQ4]	3.00157	1.60823e-12	2.09862e-11	0.908916	7.56895
Ccrd_023547	Glycosyltransferase [Uniprot/SPTREMBL Acc. A0A103XWN0]	2.99876	9.90324e-20	2.61638e-18	1.45315	12.5751
Ccrd_016960	Uncharacterized protein [Uniprot/SPTREMBL Acc. A0A103Y8Z1]	2.99384	1.91536e-06	1.07991e-05	0.82901	6.77246
Ccrd_011332	Photosystem II 10 kDa polypeptide, chloroplastic [Uniprot/SPTREMBL Acc. A0A103YJI6]	2.97508	0.00766915	0.0191793	0.0506705	0.516267
Ccrd_016939	Cytochrome P450 [Uniprot/SPTREMBL Acc. A0A118K2Q3]	2.9746	9.69163e-11	1.04126e-09	0.355825	2.96121
Ccrd_023658	Glucose/ribitol dehydrogenase [Uniprot/SPTREMBL Acc. A0A103XWG1]	2.97394	0.000165881	0.000642621	0.0906446	0.790163
Ccrd_013639		2.97336	6.67969e-08	4.87098e-07	0.0933261	0.829523
Ccrd_016374	U-box domain-containing protein [Uniprot/SPTREMBL Acc. A0A103YA23]	2.97116	7.28402e-06	3.70212e-05	0.180253	1.53392
Ccrd_024577	NAD(P)H dehydrogenase (quinone) [Uniprot/SPTREMBL Acc. A0A103XC72]	2.96721	2.55579e-06	1.40856e-05	0.189792	1.71524
Ccrd_019326	Cytochrome P450 [Uniprot/SPTREMBL Acc. A0A103Y4F8]	2.96387	9.54212e-26	3.78146e-24	7.13469	58.6871
Ccrd_002019	Uncharacterized protein [Uniprot/SPTREMBL Acc. A0A103XS49]	2.96203	1.35121e-47	1.62304e-45	6.81214	56.2545
Ccrd_020232		2.95991	1.6022e-05	7.64681e-05	0.274172	2.34329
Ccrd_004767	B box-type domain-containing protein [Uniprot/SPTREMBL Acc. A0A103XLX9]	2.95261	4.39622e-07	2.78293e-06	0.0716215	0.627508
Ccrd_023453	Peptidase S8/S53 domain-containing protein [Uniprot/SPTREMBL Acc. A0A103XWT9]	2.95158	6.63347e-08	4.84276e-07	0.185292	1.51751
Ccrd_007312	Basic-leucine zipper domain-containing protein [Uniprot/SPTREMBL Acc. A0A118JU60]	2.94941	9.06341e-34	5.9016e-32	0.912886	7.56541
Ccrd_018578	DDT domain-containing protein [Uniprot/SPTREMBL Acc. A0A103Y5X7]	2.9257	1.65061e-05	7.86429e-05	0.288496	2.39874
Ccrd_008875		2.91955	2.14084e-16	4.12779e-15	0.426078	3.47573
Ccrd_026375	DREPP plasma membrane polypeptide [Uniprot/SPTREMBL Acc. A0A103QLC0]	2.91717	7.55613e-54	1.20767e-51	27.2432	218.392
Ccrd_001127		2.91683	5.39004e-12	6.62669e-11	0.707201	5.70395
Ccrd_002627	Cellulose synthase [Uniprot/SPTREMBL Acc. A0A103XR23]	2.91463	3.53372e-31	2.00996e-29	1.16756	9.262
Ccrd_023878	AAA+ ATPase domain-containing protein [Uniprot/SPTREMBL Acc. A0A118JYK4]	2.91126	4.83942e-05	0.000209279	0.0209419	0.171388
Ccrd_020830	Glycosyltransferase [Uniprot/SPTREMBL Acc. A0A103Y1Q0]	2.9085	2.99591e-34	2.01173e-32	1.90997	15.2331
Ccrd_016830	DIOX_N domain-containing protein [Uniprot/SPTREMBL Acc. A0A124SG02]	2.90633	1.73668e-29	9.05274e-28	1.78681	14.3115
Ccrd_019055	Cytochrome P450 [Uniprot/SPTREMBL Acc. A0A103Y527]	2.90535	3.71291e-26	1.51805e-24	0.497103	4.03838
Ccrd_011480	Methyltransferase [Uniprot/SPTREMBL Acc. A0A103YJ63]	2.90436	1.59804e-31	9.28061e-30	6.36999	50.7264
Ccrd_018410		2.90399	2.66861e-17	5.64025e-16	0.696227	5.60219
Ccrd_014789	ENDO3c domain-containing protein [Uniprot/SPTREMBL Acc. A0A118K437]	2.9039	4.25127e-43	4.17337e-41	1.1122	8.96884
Ccrd_009530	Fatty acid desaturase, type 1 [Uniprot/SPTREMBL Acc. A0A124SIA1]	2.89785	2.56106e-05	0.000117255	1.77126	14.5835
Ccrd_022154		2.89718	4.37081e-06	2.32153e-05	0.189693	1.56307
Ccrd_002079	Cytochrome P450 [Uniprot/SPTREMBL Acc. A0A118JX97]	2.88585	4.43975e-14	6.71308e-13	0.369934	2.96184
Ccrd_015818		2.87649	4.39288e-21	1.27558e-19	2.01294	15.9906
Ccrd_019488		2.87544	3.10293e-07	2.01435e-06	0.104641	0.843115
Ccrd_008344		2.87331	7.50984e-14	1.11119e-12	0.229597	1.79707
Ccrd_019515	SBP-type domain-containing protein [Uniprot/SPTREMBL Acc. A0A103Y456]	2.87262	0.00376019	0.0102986	0.12118	1.03526
Ccrd_000950	Homeobox domain-containing protein [Uniprot/SPTREMBL Acc. A0A124SDH6]	2.87047	0.000109909	0.000441992	0.183238	1.54166
Ccrd_018060	Uncharacterized protein [Uniprot/SPTREMBL Acc. A0A103Y6Y1]	2.86893	8.83108e-06	4.41759e-05	0.897693	6.97515
Ccrd_003011	ENTH/VHS-like protein [Uniprot/SPTREMBL Acc. A0A103XQ91]	2.8687	1.9104e-05	8.97819e-05	0.102904	0.8419
Ccrd_019163	ZF-HD dimerization-type domain-containing protein [Uniprot/SPTREMBL Acc. A0A124SF92]	2.86587	6.00805e-11	6.58672e-10	2.35127	18.1932
Ccrd_021276		2.86168	5.68947e-08	4.19796e-07	0.268918	2.10575
Ccrd_008613	Uncharacterized protein [Uniprot/SPTREMBL Acc. A0A103XEU9]	2.85737	8.55334e-07	5.13865e-06	5.21342	38.2931
Ccrd_008411	Uncharacterized protein family Cys-rich [Uniprot/SPTREMBL Acc. A0A103XF53]	2.85266	9.21241e-26	3.66582e-24	15.3532	117.128
Ccrd_004152	Aldolase-type TIM barrel [Uniprot/SPTREMBL Acc. A0A118JW99]	2.85201	3.94696e-23	1.31378e-21	9.3546	71.0968
Ccrd_025798	Glycosyltransferase [Uniprot/SPTREMBL Acc. A0A103URE8]	2.85191	0.00163922	0.00496257	0.0528027	0.443365
Ccrd_016729	WAT1-related protein [Uniprot/SPTREMBL Acc. A0A103Y9E7]	2.84784	1.2067e-06	7.04177e-06	0.149323	1.20477
Ccrd_007915		2.84443	0.000707857	0.00235453	0.0698372	0.57478
Ccrd_000169		2.84126	5.71592e-07	3.52825e-06	0.0547955	0.424948
Ccrd_002005	Chloramphenicol acetyltransferase-like domain-containing protein [Uniprot/SPTREMBL Acc. A0A103XSC2]	2.8297	5.61089e-07	3.47118e-06	0.235729	1.83662
Ccrd_016863		2.82963	1.68141e-30	9.23773e-29	5.93712	45.1939
Ccrd_010988	Indole-3-glycerol-phosphate synthase [Uniprot/SPTREMBL Acc. A0A124SHT9]	2.82528	3.79603e-19	9.57125e-18	0.405685	3.05795
Ccrd_000010	BAG domain-containing protein [Uniprot/SPTREMBL Acc. A0A103XW25]	2.82185	6.80342e-20	1.8198e-18	6.71373	49.3105
Ccrd_014422	AP2/ERF domain-containing protein [Uniprot/SPTREMBL Acc. A0A103YDU1]	2.81926	2.72502e-21	7.99683e-20	2.03409	15.2404
Ccrd_011738	LIM zinc-binding domain-containing protein [Uniprot/SPTREMBL Acc. A0A118K5Z2]	2.81904	2.00716e-20	5.58511e-19	0.66812	5.0962
Ccrd_000821		2.81528	3.67532e-08	2.79611e-07	2.03747	15.4365
Ccrd_009136		2.81282	2.96767e-09	2.64722e-08	0.266375	2.02774
Ccrd_016883	Protein kinase domain-containing protein [Uniprot/SPTREMBL Acc. A0A103Y954]	2.81263	1.66215e-27	7.49782e-26	18.9418	142.377
Ccrd_014783		2.80397	0.0007563	0.00249549	0.275933	2.07646
Ccrd_021312	Uncharacterized protein [Uniprot/SPTREMBL Acc. A0A103Y0Y4]	2.80167	1.81469e-06	1.02705e-05	2.52278	19.549
Ccrd_010675	UDPGT domain-containing protein [Uniprot/SPTREMBL Acc. A0A118K6N3]	2.80148	2.25883e-18	5.33036e-17	0.861215	6.45371
Ccrd_016441		2.7994	1.70275e-21	5.05052e-20	7.75068	57.4731
Ccrd_019071		2.77124	2.78659e-16	5.33034e-15	31.9765	238.786
Ccrd_016480	Peptidase S9A/B/C, oligopeptidase, N-terminal beta-propeller [Uniprot/SPTREMBL Acc. A0A103Y9V2]	2.75957	2.38234e-09	2.14688e-08	1.28891	8.97275
Ccrd_001940	FGGY_C domain-containing protein [Uniprot/SPTREMBL Acc. A0A103XSB7]	2.75684	1.30791e-07	9.07885e-07	0.160543	1.18668
Ccrd_024478	HSF_DOMAIN domain-containing protein [Uniprot/SPTREMBL Acc. A0A124SAP7]	2.75467	1.64703e-18	3.92264e-17	1.69538	12.1569
Ccrd_020229	SHSP domain-containing protein [Uniprot/SPTREMBL Acc. A0A103Y2W9]	2.75272	1.59803e-18	3.81535e-17	53.1705	376.024
Ccrd_004666	AP2/ERF domain-containing protein [Uniprot/SPTREMBL Acc. A0A103XM48]	2.74952	4.16889e-06	2.221e-05	0.0928222	0.695534
Ccrd_001066	MFS domain-containing protein [Uniprot/SPTREMBL Acc. A0A103XTX5]	2.74476	0.00869517	0.021364	0.0290243	0.24288
Ccrd_026890	Uncharacterized protein [Uniprot/SPTREMBL Acc. A0A124PUF2]	2.74005	4.40816e-06	2.3356e-05	0.432686	3.06202
Ccrd_016938	Uncharacterized protein [Uniprot/SPTREMBL Acc. A0A124SFY6]	2.73954	8.28697e-26	3.31119e-24	2.07263	14.5746
Ccrd_021208	Cyclin [Uniprot/SPTREMBL Acc. A0A103Y107]	2.73521	3.67365e-38	2.96019e-36	3.75137	26.7554
Ccrd_013713		2.73294	4.98645e-09	4.32823e-08	0.165601	1.19723
Ccrd_002647	Uncharacterized protein [Uniprot/SPTREMBL Acc. A0A118JW84]	2.72665	6.49357e-37	4.88635e-35	9.35999	66.038
Ccrd_001518		2.72604	3.50421e-16	6.63092e-15	6.3853	45.8878
Ccrd_006035		2.72443	6.01544e-26	2.41856e-24	15.8657	110.206
Ccrd_001400	Galactose-binding domain-like protein [Uniprot/SPTREMBL Acc. A0A103XTF0]	2.71656	4.76688e-30	2.56787e-28	2.52777	17.5642
Ccrd_012215	Uncharacterized protein [Uniprot/SPTREMBL Acc. A0A103YHU5]	2.71452	7.76337e-28	3.64407e-26	0.729544	5.13147
Ccrd_000622		2.71329	5.66955e-07	3.5041e-06	0.298724	2.18301
Ccrd_021157		2.71242	0.00134426	0.00416079	0.0977403	0.728349
Ccrd_006012	NAD(P)-binding domain-containing protein [Uniprot/SPTREMBL Acc. A0A103XJN6]	2.71177	1.22643e-45	1.33246e-43	3.01643	21.1843
Ccrd_003533	Peptidase A1 domain-containing protein [Uniprot/SPTREMBL Acc. A0A103XPE0]	2.71135	2.67591e-16	5.12371e-15	60.2531	416.406
Ccrd_006005	Peptidase S59 domain-containing protein [Uniprot/SPTREMBL Acc. A0A103XJK8]	2.71107	1.7447e-06	9.90921e-06	0.380784	2.71754
Ccrd_020760		2.7105	9.76716e-11	1.04763e-09	53.2713	367.402
Ccrd_020225	Uncharacterized protein [Uniprot/SPTREMBL Acc. A0A118K0V7]	2.70832	0.00149456	0.00457839	0.0453255	0.370589
Ccrd_013844		2.69991	1.14696e-16	2.25647e-15	10.9513	78.0136
Ccrd_011034		2.69978	2.35113e-07	1.55874e-06	4.49928	30.415
Ccrd_019483	NAC domain-containing protein [Uniprot/SPTREMBL Acc. A0A103Y459]	2.69561	1.91413e-13	2.74e-12	2.94446	20.2025
Ccrd_008189	PRONE domain-containing protein [Uniprot/SPTREMBL Acc. A0A103XFK3]	2.69108	4.464e-30	2.41143e-28	2.9122	19.9808
Ccrd_012197	Protein kinase domain-containing protein [Uniprot/SPTREMBL Acc. A0A103YI18]	2.69004	5.64132e-05	0.0002411	0.247841	1.73213
Ccrd_021304	Auxin responsive SAUR protein [Uniprot/SPTREMBL Acc. A0A118K004]	2.68513	8.99405e-08	6.42779e-07	0.596422	4.27868
Ccrd_008380	Peroxidase [Uniprot/SPTREMBL Acc. A0A103XF57]	2.68196	2.28268e-16	4.38814e-15	3.35243	22.5538
Ccrd_017108	CCT domain-containing protein [Uniprot/SPTREMBL Acc. A0A124SFW9]	2.67549	1.59199e-15	2.84017e-14	0.327007	2.23031
Ccrd_001915	Auxin responsive SAUR protein [Uniprot/SPTREMBL Acc. A0A124SD67]	2.67318	7.42038e-05	0.000308608	0.496051	3.53827
Ccrd_013759	Cyclic nucleotide-binding domain-containing protein [Uniprot/SPTREMBL Acc. A0A103YF02]	2.67317	1.47679e-26	6.27684e-25	1.0809	7.31879
Ccrd_000174	Uncharacterized protein [Uniprot/SPTREMBL Acc. A0A103XVL7]	2.67298	8.06452e-09	6.75736e-08	1.9862	13.2166
Ccrd_008413	PB1 domain-containing protein [Uniprot/SPTREMBL Acc. A0A103XF91]	2.66707	2.53965e-12	3.24401e-11	0.848863	5.70193
Ccrd_011006		2.66669	2.79097e-06	1.52946e-05	0.370357	2.57634
Ccrd_000472		2.66619	2.01732e-14	3.18214e-13	0.506011	3.43336
Ccrd_011061	Protein kinase domain-containing protein [Uniprot/SPTREMBL Acc. A0A103YK02]	2.66254	9.92366e-55	1.68345e-52	8.04417	54.3568
Ccrd_011406	Trehalose 6-phosphate phosphatase [Uniprot/SPTREMBL Acc. A0A118K659]	2.65818	1.94768e-10	2.01963e-09	0.773255	5.13967
Ccrd_016808	Alcohol dehydrogenase, C-terminal [Uniprot/SPTREMBL Acc. A0A103Y986]	2.65694	3.22234e-25	1.2243e-23	17.211	114.256
Ccrd_015268	Uncharacterized protein [Uniprot/SPTREMBL Acc. A0A103YC66]	2.65538	2.76746e-20	7.65665e-19	26.7806	175.196
Ccrd_021413	AP2/ERF domain-containing protein [Uniprot/SPTREMBL Acc. A0A124SEK8]	2.65418	0.000238456	0.000891974	0.13611	0.95872
Ccrd_018858		2.65281	0.000110975	0.000445626	0.408096	2.88889
Ccrd_019203	WAT1-related protein [Uniprot/SPTREMBL Acc. A0A103Y4S6]	2.6484	1.83041e-11	2.11586e-10	4.38118	28.5123
Ccrd_019992	Lipoxygenase [Uniprot/SPTREMBL Acc. A0A124SF01]	2.6474	4.16475e-31	2.36194e-29	7.4791	49.1471
Ccrd_010223	Cytochrome c oxidase subunit 1 [Uniprot/SPTREMBL Acc. A0A103YLM2]	2.64642	0.00104535	0.00333434	0.10981	0.796006
Ccrd_020226	SHSP domain-containing protein [Uniprot/SPTREMBL Acc. A0A118K0M8]	2.64576	5.43744e-22	1.66912e-20	21.5535	142.642
Ccrd_019898	Endoplasmic reticulum vesicle transporter, C-terminal [Uniprot/SPTREMBL Acc. A0A103Y3F4]	2.64546	5.81374e-11	6.39181e-10	1.4439	9.3807
Ccrd_003213	BHLH domain-containing protein [Uniprot/SPTREMBL Acc. A0A103XPV8]	2.64215	3.69101e-27	1.61964e-25	1.71156	11.3415
Ccrd_021008	Response regulatory domain-containing protein [Uniprot/SPTREMBL Acc. A0A124SEP5]	2.64142	0.000455279	0.00159159	0.123015	0.869844
Ccrd_022037	BHLH domain-containing protein [Uniprot/SPTREMBL Acc. A0A124SED1]	2.63978	1.93606e-12	2.50277e-11	1.35346	8.82342
Ccrd_005570		2.62749	0.000804585	0.0026395	0.0547814	0.372335
Ccrd_015314	Carbonic anhydrase [Uniprot/SPTREMBL Acc. A0A103YC23]	2.62075	1.22653e-06	7.13862e-06	0.415832	2.66033
Ccrd_004406	ANK_REP_REGION domain-containing protein [Uniprot/SPTREMBL Acc. A0A103XMJ7]	2.61664	2.20585e-07	1.46897e-06	0.364459	2.34555
Ccrd_017576	Auxin responsive SAUR protein [Uniprot/SPTREMBL Acc. A0A103Y7T6]	2.61088	1.99914e-10	2.06856e-09	4.25121	27.7655
Ccrd_018098	Protein kinase domain-containing protein [Uniprot/SPTREMBL Acc. A0A103Y6V3]	2.61025	3.38825e-20	9.255e-19	1.28511	8.48158
Ccrd_024958	Non-specific serine/threonine protein kinase [Uniprot/SPTREMBL Acc. A0A103XBP4]	2.60764	3.2332e-17	6.76697e-16	0.630549	4.08353
Ccrd_001916	Auxin responsive SAUR protein [Uniprot/SPTREMBL Acc. A0A103XSH6]	2.60663	1.73097e-05	8.21439e-05	0.361019	2.42922
Ccrd_015255	Protein kinase domain-containing protein [Uniprot/SPTREMBL Acc. A0A103YC65]	2.60578	0.00036599	0.00131096	0.0673189	0.457872
Ccrd_022837	GUB_WAK_bind domain-containing protein [Uniprot/SPTREMBL Acc. A0A103XY08]	2.60519	3.06179e-05	0.000137863	0.211161	1.42184
Ccrd_016778	Delta-1-pyrroline-5-carboxylate synthase [Uniprot/SPTREMBL Acc. A0A103Y9A5]	2.6031	6.43219e-25	2.40139e-23	13.9159	90.0935
Ccrd_009796	Allergen V5/Tpx-1-related protein [Uniprot/SPTREMBL Acc. A0A103YMH7]	2.60251	4.23727e-10	4.21308e-09	6.8278	43.7301
Ccrd_016438	Uncharacterized protein [Uniprot/SPTREMBL Acc. A0A103Y9Y8]	2.60085	7.72553e-21	2.21012e-19	0.517774	3.35653
Ccrd_023722		2.59965	1.66325e-27	7.49782e-26	13.9445	89.0675
Ccrd_016858	Uncharacterized protein [Uniprot/SPTREMBL Acc. A0A103Y961]	2.59913	3.31672e-22	1.02957e-20	1.23263	8.05951
Ccrd_011725	SHSP domain-containing protein [Uniprot/SPTREMBL Acc. A0A124SHL0]	2.59866	6.57471e-21	1.88647e-19	200.862	1286.03
Ccrd_025569	ANK_REP_REGION domain-containing protein [Uniprot/SPTREMBL Acc. A0A103WLB2]	2.58987	3.16647e-26	1.30967e-24	15.2433	96.5291
Ccrd_007445	Cysteine dioxygenase [Uniprot/SPTREMBL Acc. A0A118JTC0]	2.58763	5.25446e-17	1.0753e-15	32.3795	202.871
Ccrd_003887		2.58595	6.71193e-06	3.43029e-05	0.0676742	0.446541
Ccrd_024940	ANK_REP_REGION domain-containing protein [Uniprot/SPTREMBL Acc. A0A124SAK7]	2.58548	4.625e-08	3.46678e-07	0.440932	2.7937
Ccrd_009114	Thioredox_DsbH domain-containing protein [Uniprot/SPTREMBL Acc. A0A103YNX4]	2.57759	0.00711952	0.0179815	0.0324197	0.211266
Ccrd_016467		2.57252	3.64211e-36	2.62816e-34	5.78002	36.5527
Ccrd_011541	E3 ubiquitin ligase [Uniprot/SPTREMBL Acc. A0A103YJ37]	2.5714	1.45283e-25	5.66456e-24	0.876816	5.58717
Ccrd_005231	FACT complex subunit SSRP1 [Uniprot/SPTREMBL Acc. A0A103XKY7]	2.56165	4.29071e-08	3.23123e-07	0.195886	1.26743
Ccrd_023998	PMEI domain-containing protein [Uniprot/SPTREMBL Acc. A0A118JSB7]	2.56089	3.06091e-08	2.34714e-07	7.89167	49.2646
Ccrd_023143	General substrate transporter [Uniprot/SPTREMBL Acc. A0A103XXA7]	2.55783	2.27516e-06	1.26653e-05	0.837078	5.1444
Ccrd_019523	Uncharacterized protein [Uniprot/SPTREMBL Acc. A0A103Y448]	2.55782	6.44448e-17	1.30776e-15	0.694053	4.35993
Ccrd_004136	Protein kinase domain-containing protein [Uniprot/SPTREMBL Acc. A0A118JVZ3]	2.55359	4.08535e-10	4.0767e-09	0.602399	3.82589
Ccrd_000449		2.55248	2.06698e-06	1.15898e-05	0.548228	3.45139
Ccrd_025983		2.55205	1.2648e-07	8.8049e-07	0.18378	1.19031
Ccrd_004481	Peroxidase [Uniprot/SPTREMBL Acc. A0A103XMH3]	2.55108	6.82387e-08	4.95929e-07	0.49906	3.1157
Ccrd_024229		2.54685	8.37603e-23	2.72242e-21	6.40169	39.8577
Ccrd_007149	Glycoside hydrolase, catalytic domain-containing protein [Uniprot/SPTREMBL Acc. A0A118JU33]	2.54662	0.00694376	0.0176112	0.0520299	0.331668
Ccrd_024179	Nicotianamine synthase [Uniprot/SPTREMBL Acc. A0A103D5K4]	2.54478	2.98419e-19	7.54396e-18	51.5895	320.715
Ccrd_015348	LRRNT_2 domain-containing protein [Uniprot/SPTREMBL Acc. A0A103YC05]	2.53827	7.2738e-08	5.26847e-07	0.39325	2.50167
Ccrd_014630	AP2/ERF domain-containing protein [Uniprot/SPTREMBL Acc. A0A124SGN9]	2.53286	8.64572e-06	4.33272e-05	0.607532	3.79186
Ccrd_007775	TPR_REGION domain-containing protein [Uniprot/SPTREMBL Acc. A0A118JT58]	2.52985	5.34738e-35	3.6413e-33	2.30734	14.2062
Ccrd_026399	Leucine-rich repeat-containing protein [Uniprot/SPTREMBL Acc. A0A118HFU5]	2.51632	1.96988e-07	1.32322e-06	0.144217	0.884356
Ccrd_022003	Pyr_redox_2 domain-containing protein [Uniprot/SPTREMBL Acc. A0A118JZB1]	2.51578	4.11102e-19	1.03251e-17	0.735186	4.53706
Ccrd_001632	HTH myb-type domain-containing protein [Uniprot/SPTREMBL Acc. A0A103XSW4]	2.51047	2.9065e-26	1.20879e-24	4.36518	26.4052
Ccrd_004610		2.5065	1.84174e-10	1.91698e-09	90.8136	547.378
Ccrd_012987	GED domain-containing protein [Uniprot/SPTREMBL Acc. A0A118K569]	2.50456	1.21605e-06	7.08987e-06	0.179677	1.12839
Ccrd_016035	RING-type E3 ubiquitin transferase [Uniprot/SPTREMBL Acc. A0A103YAR0]	2.50293	1.93318e-14	3.0519e-13	0.794892	4.80078
Ccrd_008913	Cytochrome P450 [Uniprot/SPTREMBL Acc. A0A103XE64]	2.50123	7.10691e-05	0.000296656	0.160152	1.01109
Ccrd_019899	Uncharacterized protein [Uniprot/SPTREMBL Acc. A0A103Y3E9]	2.49949	1.56521e-13	2.25893e-12	1.72453	10.2951
Ccrd_021915	Fe2OG dioxygenase domain-containing protein [Uniprot/SPTREMBL Acc. A0A103XZN4]	2.49802	2.27449e-12	2.92074e-11	3.53045	21.9337
Ccrd_006619	UDPGT domain-containing protein [Uniprot/SPTREMBL Acc. A0A118JTV9]	2.49516	1.43374e-39	1.20031e-37	4.57471	27.3973
Ccrd_012286	Protein kinase domain-containing protein [Uniprot/SPTREMBL Acc. A0A103YHS6]	2.48702	1.62284e-08	1.29526e-07	0.322187	1.94252
Ccrd_014971	BHLH domain-containing protein [Uniprot/SPTREMBL Acc. A0A124SGK4]	2.48389	3.4636e-27	1.52928e-25	19.3546	113.793
Ccrd_022968	Dof-type domain-containing protein [Uniprot/SPTREMBL Acc. A0A103XXR1]	2.48235	5.92062e-06	3.0582e-05	0.267288	1.65096
Ccrd_011525	Trehalose 6-phosphate phosphatase [Uniprot/SPTREMBL Acc. A0A103YJ66]	2.48147	1.1532e-13	1.68442e-12	1.78465	10.3605
Ccrd_006016	Uncharacterized protein [Uniprot/SPTREMBL Acc. A0A103XJJ2]	2.47753	1.50956e-12	1.97653e-11	2.43313	14.1197
Ccrd_021948		2.47179	7.72011e-06	3.91143e-05	0.141761	0.867716
Ccrd_014373	Cytochrome P450 [Uniprot/SPTREMBL Acc. A0A103YDX4]	2.46655	1.6664e-08	1.32728e-07	3.42806	19.5057
Ccrd_015638	VOC domain-containing protein [Uniprot/SPTREMBL Acc. A0A118K3J3]	2.46567	5.06067e-30	2.71103e-28	58.632	341.647
Ccrd_000038		2.46434	1.14819e-14	1.87066e-13	1.44066	8.44132
Ccrd_008689	Glycoside hydrolase, catalytic domain-containing protein [Uniprot/SPTREMBL Acc. A0A103XES1]	2.46158	2.43833e-09	2.19325e-08	2.0455	11.7704
Ccrd_005475		2.45599	0.000194971	0.000743112	0.757842	4.44036
Ccrd_011518	PMEI domain-containing protein [Uniprot/SPTREMBL Acc. A0A124SHN4]	2.45339	2.36059e-07	1.56448e-06	4.93357	27.591
Ccrd_016899	Protein kinase domain-containing protein [Uniprot/SPTREMBL Acc. A0A103Y928]	2.45291	1.14998e-08	9.43948e-08	1.3104	7.67572
Ccrd_018864	Receptor-like serine/threonine-protein kinase [Uniprot/SPTREMBL Acc. A0A103Y5E6]	2.44926	2.49173e-05	0.000114405	0.175478	0.998104
Ccrd_014788	RRM domain-containing protein [Uniprot/SPTREMBL Acc. A0A124SGM6]	2.44877	7.68138e-14	1.13484e-12	1.84953	11.0342
Ccrd_026154	Sodium/sulfate symporter [Uniprot/SPTREMBL Acc. A0A124SAV6]	2.44571	3.39772e-27	1.50363e-25	9.87633	56.8356
Ccrd_017784	Biotin carboxylation domain-containing protein [Uniprot/SPTREMBL Acc. A0A103Y7G1]	2.44331	1.19856e-14	1.94618e-13	4.47181	25.5729
Ccrd_002364		2.44237	0.00189621	0.00564079	0.415031	2.43345
Ccrd_007525	Glutaredoxin-dependent peroxiredoxin [Uniprot/SPTREMBL Acc. A0A103XGV7]	2.43847	1.63779e-09	1.50897e-08	5.57613	31.9523
Ccrd_004431		2.43673	9.54443e-05	0.000388455	0.0881809	0.530513
Ccrd_000246		2.43552	0.000533057	0.00183267	0.112963	0.689523
Ccrd_003293	Cytochrome P450 [Uniprot/SPTREMBL Acc. A0A103XPW3]	2.43421	1.03225e-06	6.10479e-06	0.256551	1.4798
Ccrd_017899	Uncharacterized protein [Uniprot/SPTREMBL Acc. A0A124SFN2]	2.43403	1.42001e-05	6.84827e-05	0.210119	1.25265
Ccrd_008900	CAP10 domain-containing protein [Uniprot/SPTREMBL Acc. A0A103XEE5]	2.42707	1.76995e-13	2.54114e-12	2.83811	15.8555
Ccrd_017904		2.42175	7.96086e-12	9.60419e-11	3.00796	17.2828
Ccrd_013141	Pectinesterase [Uniprot/SPTREMBL Acc. A0A103YG83]	2.41783	1.68641e-27	7.58452e-26	17.0538	96.3822
Ccrd_006888		2.41569	2.57959e-15	4.49429e-14	1.03394	5.86197
Ccrd_007101	AP2/ERF domain-containing protein [Uniprot/SPTREMBL Acc. A0A103XHN2]	2.41526	3.57781e-07	2.29936e-06	1.14101	6.71747
Ccrd_000135	Homeobox domain-containing protein [Uniprot/SPTREMBL Acc. A0A118JXY2]	2.41004	1.73079e-31	1.00215e-29	9.03845	51.1649
Ccrd_022155	Myb-like domain-containing protein [Uniprot/SPTREMBL Acc. A0A124SEB7]	2.40907	1.05905e-37	8.25849e-36	7.65455	43.384
Ccrd_007895		2.40483	3.69337e-27	1.61964e-25	6.53082	36.3539
Ccrd_025757		2.40242	1.23682e-09	1.15774e-08	3.42187	18.9106
Ccrd_002435		2.40234	7.12872e-20	1.89893e-18	3.00423	16.974
Ccrd_011536	PKS_ER domain-containing protein [Uniprot/SPTREMBL Acc. A0A103YJ56]	2.39589	1.46028e-35	1.02693e-33	4.51575	25.4449
Ccrd_002714	Aluminum-activated malate transporter [Uniprot/SPTREMBL Acc. A0A103XQY7]	2.38995	3.02516e-08	2.32157e-07	0.468117	2.66013
Ccrd_014514	Uncharacterized protein [Uniprot/SPTREMBL Acc. A0A124SGQ5]	2.3893	1.35786e-14	2.19196e-13	11.6692	65.7905
Ccrd_013913		2.38689	0.0138167	0.0318895	0.048847	0.294353
Ccrd_007035	Cystatin domain-containing protein [Uniprot/SPTREMBL Acc. A0A103XHN8]	2.38678	2.90318e-22	9.04098e-21	372.691	2067.49
Ccrd_025899		2.38487	0.00235241	0.00682876	0.202345	1.13238
Ccrd_004046	HSF_DOMAIN domain-containing protein [Uniprot/SPTREMBL Acc. A0A103XNF8]	2.38428	1.80394e-05	8.51926e-05	0.27184	1.56475
Ccrd_023604	Peptidoglycan-binding lysin domain-containing protein [Uniprot/SPTREMBL Acc. A0A118JY81]	2.38364	0.00230854	0.00671755	0.0862823	0.52281
Ccrd_012677		2.38198	5.36801e-08	3.98204e-07	0.814409	4.44391
Ccrd_018919	Fatty acid hydroxylase domain-containing protein [Uniprot/SPTREMBL Acc. A0A103Y5B0]	2.3809	1.54726e-19	4.01645e-18	13.1834	73.652
Ccrd_026682	Oligopeptide transporter OPT superfamily [Uniprot/SPTREMBL Acc. A0A103XD36]	2.37733	6.99954e-07	4.27454e-06	0.369557	2.08099
Ccrd_012958	Uncharacterized protein [Uniprot/SPTREMBL Acc. A0A103YGG1]	2.37459	4.83148e-27	2.09029e-25	4.58101	25.0133
Ccrd_008568		2.37294	7.4846e-17	1.51091e-15	2.50372	13.8562
Ccrd_008496	Protein kinase domain-containing protein [Uniprot/SPTREMBL Acc. A0A103XF50]	2.36973	4.509e-09	3.94211e-08	2.8065	15.1124
Ccrd_000732	Glycine--tRNA ligase [Uniprot/SPTREMBL Acc. A0A103XUM5]	2.36701	4.09539e-33	2.57145e-31	5.39624	29.6858
Ccrd_016921		2.36622	4.0711e-14	6.19442e-13	0.709586	3.88707
Ccrd_006094	Protein kinase domain-containing protein [Uniprot/SPTREMBL Acc. A0A103XJE7]	2.36535	8.28471e-13	1.11031e-11	0.535793	2.95305
Ccrd_015273	CHY-type domain-containing protein [Uniprot/SPTREMBL Acc. A0A118K3R8]	2.36162	1.32197e-23	4.53289e-22	0.707185	3.91012
Ccrd_003287	Transcription factor IIA, alpha/beta subunit [Uniprot/SPTREMBL Acc. A0A118JVU8]	2.36146	2.76581e-05	0.000125706	0.214145	1.21333
Ccrd_001660	TPX2 domain-containing protein [Uniprot/SPTREMBL Acc. A0A103XSW1]	2.36029	4.3041e-18	9.88562e-17	1.21214	6.62396
Ccrd_016649	Kinesin motor domain-containing protein [Uniprot/SPTREMBL Acc. A0A103Y9M4]	2.35855	2.90155e-11	3.27955e-10	0.254131	1.38132
Ccrd_001050	Homeodomain-like protein [Uniprot/SPTREMBL Acc. A0A103XU09]	2.3542	2.03071e-18	4.80684e-17	2.48552	13.7572
Ccrd_023524	FAD-binding PCMH-type domain-containing protein [Uniprot/SPTREMBL Acc. A0A118JYK6]	2.35061	6.73214e-05	0.00028272	0.280349	1.50613
Ccrd_025739	Oligopeptide transporter OPT superfamily [Uniprot/SPTREMBL Acc. A0A103UZN3]	2.35037	9.1754e-08	6.54289e-07	0.171837	0.944405
Ccrd_014255	Uncharacterized protein [Uniprot/SPTREMBL Acc. A0A103YDY5]	2.33551	1.17055e-18	2.82612e-17	4.24686	22.3751
Ccrd_004391	Uncharacterized protein [Uniprot/SPTREMBL Acc. A0A103XMQ3]	2.33472	5.56873e-06	2.90123e-05	0.715621	4.00881
Ccrd_011322	4-hydroxy-4-methyl-2-oxoglutarate aldolase [Uniprot/SPTREMBL Acc. A0A103YJL0]	2.33202	8.3057e-23	2.70411e-21	6.80302	36.6108
Ccrd_003514	Piezo family [Uniprot/SPTREMBL Acc. A0A118JVP9]	2.32429	4.25099e-05	0.000185701	0.0334635	0.185361
Ccrd_000232	Bet_v_1 domain-containing protein [Uniprot/SPTREMBL Acc. A0A103XVI8]	2.31733	4.36693e-08	3.2848e-07	2.96648	15.881
Ccrd_001394	Protein kinase domain-containing protein [Uniprot/SPTREMBL Acc. A0A103XTD3]	2.31679	5.1103e-24	1.80673e-22	0.993921	5.31069
Ccrd_017687		2.31659	1.71244e-08	1.36059e-07	4.78585	25.6049
Ccrd_020987	Uncharacterized protein [Uniprot/SPTREMBL Acc. A0A103Y1E9]	2.31083	6.55448e-24	2.29632e-22	4.40582	23.1255
Ccrd_013910		2.30994	1.14162e-37	8.86656e-36	5.16005	27.2999
Ccrd_005993	Lipase_3 domain-containing protein [Uniprot/SPTREMBL Acc. A0A118JUF2]	2.30137	6.35017e-09	5.41234e-08	0.590052	3.15032
Ccrd_022196	Peroxidase [Uniprot/SPTREMBL Acc. A0A103XZ93]	2.29765	4.12669e-10	4.11583e-09	50.2473	274.944
Ccrd_017471	Chloramphenicol acetyltransferase-like domain-containing protein [Uniprot/SPTREMBL Acc. A0A118K2E9]	2.29711	0.000154878	0.000603868	0.20343	1.08643
Ccrd_002831	Fatty acid desaturase, type 1 [Uniprot/SPTREMBL Acc. A0A118JW50]	2.29696	5.13681e-07	3.20351e-06	4.02352	20.6896
Ccrd_011106	DUF4408 domain-containing protein [Uniprot/SPTREMBL Acc. A0A103YJY0]	2.29624	9.08715e-07	5.43235e-06	0.427939	2.32026
Ccrd_018836	Peroxidase [Uniprot/SPTREMBL Acc. A0A118K1I0]	2.29555	2.05619e-30	1.12648e-28	17.1847	90.312
Ccrd_024789	Cytochrome f [Uniprot/SPTREMBL Acc. A0A118JRZ3]	2.2953	0.00283514	0.00802058	0.231399	1.28135
Ccrd_022997	Cytochrome b [Uniprot/SPTREMBL Acc. A0A103XXT8]	2.29523	0.00121354	0.00380547	0.477225	2.57851
Ccrd_006491	CW-type domain-containing protein [Uniprot/SPTREMBL Acc. A0A103XJ19]	2.29503	1.6074e-13	2.31463e-12	0.185856	0.981802
Ccrd_002007		2.28316	8.92941e-18	1.98947e-16	28.333	145.311
Ccrd_015012	Calcium-binding EF-hand [Uniprot/SPTREMBL Acc. A0A103YCM4]	2.28234	0.000314543	0.00114277	0.533208	2.85724
Ccrd_004750	Polyphenol oxidase, central domain-containing protein [Uniprot/SPTREMBL Acc. A0A103XLY4]	2.2791	1.05116e-14	1.71838e-13	0.372502	1.95858
Ccrd_016220		2.27835	1.35604e-11	1.5942e-10	2.53915	12.9413
Ccrd_012256	MLO-like protein [Uniprot/SPTREMBL Acc. A0A103YHU3]	2.2778	0.00419767	0.0113489	0.0695735	0.363175
Ccrd_012592	Cystinosin/ERS1p repeat-containing protein [Uniprot/SPTREMBL Acc. A0A103YH84]	2.27702	3.17895e-17	6.66064e-16	5.46352	27.7174
Ccrd_013894	NB-ARC domain-containing protein [Uniprot/SPTREMBL Acc. A0A103YEP1]	2.27681	9.51814e-15	1.56523e-13	0.503401	2.63701
Ccrd_004882		2.27555	2.19365e-17	4.67213e-16	5.63157	29.2619
Ccrd_015799	Lipoxygenase [Uniprot/SPTREMBL Acc. A0A103YB69]	2.27231	9.58777e-15	1.57401e-13	3.79929	19.1172
Ccrd_003078	HAD-like domain-containing protein [Uniprot/SPTREMBL Acc. A0A103XQA3]	2.27223	6.21379e-28	2.93811e-26	8.77715	44.9862
Ccrd_008947		2.27185	8.7999e-36	6.30301e-34	7.53371	39.1537
Ccrd_024817	SET domain-containing protein [Uniprot/SPTREMBL Acc. A0A103XBX9]	2.26957	1.36656e-11	1.60558e-10	0.480252	2.48344
Ccrd_007130	Uncharacterized protein [Uniprot/SPTREMBL Acc. A0A103XHI5]	2.26957	1.20022e-11	1.42749e-10	16.6777	83.0188
Ccrd_016913	Cytochrome P450 [Uniprot/SPTREMBL Acc. A0A103Y929]	2.26777	2.05703e-07	1.37698e-06	0.142358	0.753116
Ccrd_007916		2.26758	6.57434e-15	1.0951e-13	0.504939	2.5993
Ccrd_001177		2.26015	2.54298e-07	1.67617e-06	0.704759	3.57514
Ccrd_011187	Na_H_Exchanger domain-containing protein [Uniprot/SPTREMBL Acc. A0A103YJX0]	2.25606	0.00206568	0.00608301	0.211945	1.08595
Ccrd_019288	Glycerophosphodiester phosphodiesterase [Uniprot/SPTREMBL Acc. A0A103Y4K6]	2.25499	1.31127e-33	8.50963e-32	12.1358	61.3087
Ccrd_005040	Germin-like protein [Uniprot/SPTREMBL Acc. A0A118JVK7]	2.25466	0.00429839	0.0115969	0.150997	0.815539
Ccrd_021640		2.25419	4.34806e-11	4.84373e-10	33.7198	171.957
Ccrd_009555	Concanavalin A-like lectin/glucanase superfamily [Uniprot/SPTREMBL Acc. A0A103YMS9]	2.24774	4.64872e-09	4.05693e-08	0.873136	4.41942
Ccrd_001455		2.24061	1.69351e-07	1.14794e-06	0.423829	2.20365
Ccrd_003079	Receptor-like serine/threonine-protein kinase [Uniprot/SPTREMBL Acc. A0A103XQ49]	2.24003	6.88483e-17	1.39566e-15	4.31796	21.302
Ccrd_014474		2.23869	1.39922e-11	1.64197e-10	0.373606	1.91004
Ccrd_023512	Exocyst subunit Exo70 family protein [Uniprot/SPTREMBL Acc. A0A103XWQ9]	2.23306	1.91459e-11	2.20788e-10	0.443933	2.25023
Ccrd_002621	Glutaredoxin domain-containing protein [Uniprot/SPTREMBL Acc. A0A103XR19]	2.23221	4.4715e-16	8.3389e-15	2.36201	11.9061
Ccrd_026384	Glycosyltransferase [Uniprot/SPTREMBL Acc. A0A124R631]	2.23043	4.30934e-06	2.2914e-05	0.322941	1.63842
Ccrd_005908		2.23004	0.00542123	0.0141946	0.0929124	0.50088
Ccrd_021313	Glycoside hydrolase, family 28 [Uniprot/SPTREMBL Acc. A0A103Y0U7]	2.22889	1.74228e-08	1.38203e-07	10.4194	54.1314
Ccrd_018838	Dehydrin [Uniprot/SPTREMBL Acc. A0A103Y5G8]	2.22703	9.45425e-05	0.00038508	0.378312	1.92861
Ccrd_011277	RING-type domain-containing protein [Uniprot/SPTREMBL Acc. A0A103YJU8]	2.22668	7.78119e-22	2.35863e-20	13.7574	68.9273
Ccrd_011011		2.22531	9.9307e-10	9.42807e-09	1.40234	6.98736
Ccrd_024984	Auxin-responsive protein [Uniprot/SPTREMBL Acc. A0A124SAJ9]	2.22223	9.43005e-26	3.74472e-24	27.1602	134.505
Ccrd_025208		2.22064	3.02042e-10	3.07593e-09	15.4587	78.3115
Ccrd_018331	DOG1 domain-containing protein [Uniprot/SPTREMBL Acc. A0A103Y6E5]	2.22027	1.64282e-05	7.82911e-05	0.663651	3.41789
Ccrd_005061	Glutamate receptor [Uniprot/SPTREMBL Acc. A0A103XLB2]	2.2141	1.05676e-08	8.71503e-08	0.328013	1.64265
Ccrd_019305	Peroxidase [Uniprot/SPTREMBL Acc. A0A124SF82]	2.21215	3.76312e-26	1.53534e-24	11.3936	56.6528
Ccrd_017399	Aminotran_1_2 domain-containing protein [Uniprot/SPTREMBL Acc. A0A103Y866]	2.21178	2.05145e-16	3.9673e-15	5.58346	27.1481
Ccrd_014814	Phytocyanin domain-containing protein [Uniprot/SPTREMBL Acc. A0A103YD10]	2.20968	1.16192e-08	9.52536e-08	2.27291	11.2094
Ccrd_023705	Phytocyanin domain-containing protein [Uniprot/SPTREMBL Acc. A0A124SDU7]	2.20797	3.88109e-13	5.34971e-12	9.81429	48.7183
Ccrd_024117	Concanavalin A-like lectin/glucanase, subgroup [Uniprot/SPTREMBL Acc. A0A103XCR0]	2.20483	1.54777e-22	4.915e-21	0.130701	0.645375
Ccrd_001105		2.20151	0.00846884	0.0208582	0.191118	0.95625
Ccrd_011022	CASP-like protein [Uniprot/SPTREMBL Acc. A0A118K6F4]	2.19774	4.87544e-17	1.00304e-15	19.9028	98.1701
Ccrd_019171	Glutaredoxin domain-containing protein [Uniprot/SPTREMBL Acc. A0A103Y4S2]	2.19761	3.66886e-14	5.62219e-13	3.18115	15.3357
Ccrd_004513	Peroxidase [Uniprot/SPTREMBL Acc. A0A103XMC8]	2.19522	2.44961e-09	2.20237e-08	3.31978	16.2429
Ccrd_006075	Fe2OG dioxygenase domain-containing protein [Uniprot/SPTREMBL Acc. A0A103XJN3]	2.19467	6.3755e-29	3.22764e-27	25.4835	124.112
Ccrd_018368		2.1934	0.00157545	0.0047988	0.791357	4.18327
Ccrd_015677	Uncharacterized protein [Uniprot/SPTREMBL Acc. A0A124SGC9]	2.18788	8.52451e-18	1.90364e-16	1.61067	7.86554
Ccrd_005311	Uncharacterized protein [Uniprot/SPTREMBL Acc. A0A118JUU3]	2.18299	1.53417e-21	4.55748e-20	25.9875	124.327
Ccrd_020155	Protein kinase domain-containing protein [Uniprot/SPTREMBL Acc. A0A103Y309]	2.18106	0.000482021	0.00167388	0.248566	1.23526
Ccrd_022518	Protein kinase domain-containing protein [Uniprot/SPTREMBL Acc. A0A103XYG3]	2.18007	7.62838e-09	6.41136e-08	0.322042	1.57013
Ccrd_001435	Bet_v_1 domain-containing protein [Uniprot/SPTREMBL Acc. A0A103XTC1]	2.1796	7.54369e-29	3.79915e-27	219.193	1067.02
Ccrd_001104	Polyphenol oxidase [Uniprot/SPTREMBL Acc. A0A118JXA6]	2.17733	4.2303e-19	1.06109e-17	41.3466	197.493
Ccrd_004073	Pectinesterase [Uniprot/SPTREMBL Acc. A0A124SCH9]	2.17509	1.89928e-05	8.92808e-05	1.70883	8.03832
Ccrd_002385	Peptidase A1 domain-containing protein [Uniprot/SPTREMBL Acc. A0A103XRH9]	2.17278	1.48164e-10	1.5598e-09	5.20946	24.3549
Ccrd_007296	Cytochrome P450 [Uniprot/SPTREMBL Acc. A0A103XHC0]	2.17182	7.78743e-09	6.53935e-08	0.728278	3.52418
Ccrd_011014	NTP_transferase domain-containing protein [Uniprot/SPTREMBL Acc. A0A118K6F7]	2.16982	1.92609e-22	6.10635e-21	3.2558	15.8286
Ccrd_001693	FAS1 domain-containing protein [Uniprot/SPTREMBL Acc. A0A103XST8]	2.16976	0.0121415	0.0285997	0.0833354	0.415419
Ccrd_004649		2.16705	2.00385e-33	1.28746e-31	46.0468	220.132
Ccrd_009477	Uncharacterized protein [Uniprot/SPTREMBL Acc. A0A103YN76]	2.16228	2.74837e-07	1.79746e-06	0.173949	0.851072
Ccrd_016755	Protein kinase domain-containing protein [Uniprot/SPTREMBL Acc. A0A103Y9D1]	2.16122	1.13596e-16	2.23939e-15	1.78875	8.51871
Ccrd_007225		2.15998	0.00555406	0.0144953	0.140385	0.681827
Ccrd_024719		2.15829	4.78855e-09	4.16768e-08	42.8346	199.821
Ccrd_008501		2.15711	0.000272035	0.00100437	1.05385	4.8229
Ccrd_021222		2.15525	3.05775e-28	1.46734e-26	2.9754	14.2373
Ccrd_015358	Aldolase-type TIM barrel [Uniprot/SPTREMBL Acc. A0A118K3Q2]	2.15502	0.000530563	0.0018254	0.0677266	0.344161
Ccrd_013374	Sucrose-phosphate synthase [Uniprot/SPTREMBL Acc. A0A124SH29]	2.15394	7.87261e-06	3.98348e-05	0.276533	1.32537
Ccrd_007503	Concanavalin A-like lectin/glucanase, subgroup [Uniprot/SPTREMBL Acc. A0A118JTA6]	2.15317	2.78126e-18	6.50383e-17	3.27764	15.6772
Ccrd_007221		2.15019	2.5027e-07	1.65074e-06	1.52989	7.34482
Ccrd_022072	ULP_PROTEASE domain-containing protein [Uniprot/SPTREMBL Acc. A0A103XZD5]	2.14461	1.12782e-19	2.9514e-18	1.5644	7.40267
Ccrd_011544		2.14311	1.82312e-08	1.44143e-07	0.731126	3.50544
Ccrd_002944	UDP-glucuronosyl/UDP-glucosyltransferase [Uniprot/SPTREMBL Acc. A0A103XQD6]	2.14184	0.00020908	0.000791582	0.196151	0.951742
Ccrd_019976	Acetyl-coenzyme A carboxyltransferase, C-terminal [Uniprot/SPTREMBL Acc. A0A103Y399]	2.14174	5.72842e-18	1.30332e-16	23.6342	109.247
Ccrd_003696		2.13629	2.82286e-11	3.19622e-10	2.21873	10.4049
Ccrd_017922	Uncharacterized protein [Uniprot/SPTREMBL Acc. A0A118K240]	2.13335	3.50616e-05	0.000155732	0.18362	0.885989
Ccrd_001229		2.1325	1.72284e-10	1.80097e-09	2.37872	11.3083
Ccrd_010276	Protein kinase domain-containing protein [Uniprot/SPTREMBL Acc. A0A103YLE4]	2.13096	5.55241e-10	5.43411e-09	0.714144	3.30633
Ccrd_017670	Copper chaperone SCO1/SenC [Uniprot/SPTREMBL Acc. A0A103Y7N7]	2.13059	2.30004e-17	4.89335e-16	2.09216	9.83235
Ccrd_006515	Zinc finger, CCCH-type [Uniprot/SPTREMBL Acc. A0A103XIW1]	2.13052	8.93917e-09	7.44522e-08	98.5065	456.921
Ccrd_007274	Uncharacterized protein [Uniprot/SPTREMBL Acc. A0A103XH75]	2.11756	2.0636e-26	8.63807e-25	4.888	22.8148
Ccrd_016208		2.11507	3.33876e-05	0.000149119	39.8385	176.528
Ccrd_012320	4-hydroxyphenylpyruvate dioxygenase [Uniprot/SPTREMBL Acc. A0A103YHP3]	2.11491	7.54113e-11	8.18394e-10	63.5155	289.147
Ccrd_006421	Ferrochelatase [Uniprot/SPTREMBL Acc. A0A103XIR3]	2.11419	6.12631e-24	2.15021e-22	16.2289	74.1173
Ccrd_007206		2.1094	0.00313178	0.00877	0.112592	0.532565
Ccrd_024477		2.10341	0.0024289	0.00700768	0.490084	2.28597
Ccrd_000547		2.10213	2.5005e-06	1.38203e-05	0.778738	3.59948
Ccrd_019767	Abhydrolase_3 domain-containing protein [Uniprot/SPTREMBL Acc. A0A118K0W8]	2.09946	4.80808e-24	1.70299e-22	18.5162	84.8191
Ccrd_005744	Uncharacterized protein [Uniprot/SPTREMBL Acc. A0A124SC02]	2.09819	3.99337e-10	3.99317e-09	6.10831	27.5834
Ccrd_008892	Malic enzyme, NAD-binding [Uniprot/SPTREMBL Acc. A0A103XEG0]	2.09816	7.2542e-17	1.46593e-15	0.906829	4.15294
Ccrd_021621	AAI domain-containing protein [Uniprot/SPTREMBL Acc. A0A103Y099]	2.09813	0.000271259	0.00100208	19.7006	93.135
Ccrd_008536	SGNH hydrolase-type esterase domain-containing protein [Uniprot/SPTREMBL Acc. A0A103XEZ7]	2.08952	0.000174864	0.00067324	0.369144	1.70823
Ccrd_015602		2.08811	6.30673e-13	8.51717e-12	41.7045	188.545
Ccrd_013235	HTH myb-type domain-containing protein [Uniprot/SPTREMBL Acc. A0A103YG07]	2.08722	4.48384e-07	2.83006e-06	0.315513	1.43603
Ccrd_026166		2.08706	0.00044233	0.00155136	0.888234	4.02642
Ccrd_002176	Protein kinase domain-containing protein [Uniprot/SPTREMBL Acc. A0A103XRY3]	2.08448	7.45056e-13	1.0006e-11	1.65447	7.53481
Ccrd_014942	Peptidase T2, asparaginase 2 [Uniprot/SPTREMBL Acc. A0A118K3Z2]	2.08407	2.1414e-06	1.19793e-05	0.57012	2.56877
Ccrd_001305	HTH myb-type domain-containing protein [Uniprot/SPTREMBL Acc. A0A103XTH5]	2.08195	9.04604e-05	0.000370011	0.537478	2.46149
Ccrd_009522	LRRNT_2 domain-containing protein [Uniprot/SPTREMBL Acc. A0A103YMY6]	2.07583	9.81077e-13	1.30758e-11	1.0746	4.85639
Ccrd_003173		2.07565	0.000194059	0.000740364	0.0788987	0.37368
Ccrd_006497	Protein kinase domain-containing protein [Uniprot/SPTREMBL Acc. A0A103XIL6]	2.07496	1.62438e-18	3.87347e-17	3.9035	17.4414
Ccrd_016829	V-SNARE coiled-coil homology domain-containing protein [Uniprot/SPTREMBL Acc. A0A103Y9A6]	2.07268	6.53105e-15	1.08883e-13	1.83872	8.29517
Ccrd_017989		2.06897	1.87432e-06	1.05832e-05	1.03479	4.76949
Ccrd_006375	Uncharacterized protein [Uniprot/SPTREMBL Acc. A0A103XJ50]	2.06504	1.33248e-14	2.15459e-13	0.644818	2.87595
Ccrd_010416		2.06255	0.000330615	0.00119554	0.231356	1.07323
Ccrd_007734	Glycoside hydrolase, family 79 [Uniprot/SPTREMBL Acc. A0A103XGN6]	2.06028	1.25917e-07	8.76883e-07	0.511927	2.27353
Ccrd_013255	RING-type E3 ubiquitin transferase [Uniprot/SPTREMBL Acc. A0A103YFX4]	2.06017	5.27721e-13	7.17188e-12	19.8746	88.1693
Ccrd_001983	LRRNT_2 domain-containing protein [Uniprot/SPTREMBL Acc. A0A124SD60]	2.05995	4.35237e-05	0.000189958	0.129436	0.580697
Ccrd_021394		2.05665	0.0157422	0.0356988	0.434654	1.97637
Ccrd_006068		2.05404	1.39988e-28	6.90619e-27	52.135	228.941
Ccrd_006152	NAB domain-containing protein [Uniprot/SPTREMBL Acc. A0A118JU09]	2.04944	8.43181e-18	1.88949e-16	0.711513	3.18446
Ccrd_015640		2.04732	5.07114e-10	4.98074e-09	17.7858	81.4319
Ccrd_007567	Auxin responsive SAUR protein [Uniprot/SPTREMBL Acc. A0A103XGS0]	2.04393	4.19554e-09	3.68137e-08	2.04226	9.07184
Ccrd_000755	GH16 domain-containing protein [Uniprot/SPTREMBL Acc. A0A103XUP3]	2.04383	3.17865e-16	6.05039e-15	1396.22	6083.92
Ccrd_026362	MLO-like protein [Uniprot/SPTREMBL Acc. A0A103XD61]	2.04158	4.8681e-07	3.0497e-06	0.349442	1.56052
Ccrd_001603	Uncharacterized protein [Uniprot/SPTREMBL Acc. A0A103XSY9]	2.04061	1.89686e-06	1.0698e-05	2.89836	13.2226
Ccrd_014803	ULP_PROTEASE domain-containing protein [Uniprot/SPTREMBL Acc. A0A118K419]	2.04042	2.81455e-10	2.87385e-09	3.29782	14.5482
Ccrd_025481	Heat shock protein 70, conserved site-containing protein [Uniprot/SPTREMBL Acc. A0A103WZZ8]	2.03855	0.000463875	0.00161812	0.122732	0.55226
Ccrd_015355	Protein kinase domain-containing protein [Uniprot/SPTREMBL Acc. A0A103YBX4]	2.03357	0.000350248	0.00126023	0.099729	0.450171
Ccrd_002531	Cytochrome P450 [Uniprot/SPTREMBL Acc. A0A103XR64]	2.03323	1.13346e-07	7.95932e-07	1.69717	7.29583
Ccrd_025817		2.03194	0.00725575	0.0182588	0.0911681	0.4207
Ccrd_009127	HSF_DOMAIN domain-containing protein [Uniprot/SPTREMBL Acc. A0A103YNM2]	2.02907	2.05738e-08	1.61345e-07	0.927196	4.07569
Ccrd_016885	Uncharacterized protein [Uniprot/SPTREMBL Acc. A0A103Y943]	2.02855	1.48783e-19	3.87257e-18	5.89479	25.7038
Ccrd_012021	SHSP domain-containing protein [Uniprot/SPTREMBL Acc. A0A103YI88]	2.0282	7.57089e-12	9.16229e-11	93.7	395.813
Ccrd_004852	ANF_receptor domain-containing protein [Uniprot/SPTREMBL Acc. A0A103XLV4]	2.0265	0.00224954	0.00656463	0.293908	1.28118
Ccrd_025122		2.02635	0.000416021	0.00146707	0.589691	2.65786
Ccrd_007955		2.02446	2.41484e-09	2.17313e-08	1.79899	7.72367
Ccrd_018182	DNA polymerase alpha/epsilon, subunit B [Uniprot/SPTREMBL Acc. A0A118K208]	2.02234	1.18508e-14	1.92752e-13	47.0692	203.086
Ccrd_004374	Uncharacterized protein [Uniprot/SPTREMBL Acc. A0A103XMP0]	2.02002	7.37003e-19	1.81797e-17	8.77188	38.0481
Ccrd_016083	GSDH domain-containing protein [Uniprot/SPTREMBL Acc. A0A118K395]	2.01996	8.10067e-19	1.98806e-17	5.32068	23.0423
Ccrd_019843		2.01819	3.95256e-13	5.42888e-12	33.7814	146.567
Ccrd_014323		2.01792	1.89026e-10	1.96431e-09	3.54402	15.3137
Ccrd_019519	Ribonuclease H-like domain-containing protein [Uniprot/SPTREMBL Acc. A0A124SF58]	2.0176	6.33838e-10	6.1597e-09	1.36226	5.8853
Ccrd_003409		2.01723	3.5309e-17	7.36613e-16	7.96066	34.6689
Ccrd_000333		2.01665	1.56045e-11	1.81793e-10	126.452	533.989
Ccrd_003100	Laccase [Uniprot/SPTREMBL Acc. A0A103XQ48]	2.01564	3.63555e-12	4.57468e-11	36.7258	158.268
Ccrd_012678	Peroxidase [Uniprot/SPTREMBL Acc. A0A118K5F6]	2.01543	8.74353e-27	3.74925e-25	45.9957	197.965
Ccrd_005201	Cyclic nucleotide-binding domain-containing protein [Uniprot/SPTREMBL Acc. A0A103XL49]	2.01418	4.64299e-10	4.58584e-09	0.528451	2.29181
Ccrd_013634	DNA replication ATP-dependent helicase/nuclease [Uniprot/SPTREMBL Acc. A0A103YF89]	2.01368	0.00425654	0.011492	0.18047	0.796862
Ccrd_002357	Uncharacterized protein [Uniprot/SPTREMBL Acc. A0A103XRL8]	2.01119	1.27834e-25	5.03498e-24	55.3435	240.225
Ccrd_004510	Peroxidase [Uniprot/SPTREMBL Acc. A0A103XMD1]	2.00696	2.15295e-09	1.95473e-08	9.8952	42.5025
Ccrd_010817	Uncharacterized protein [Uniprot/SPTREMBL Acc. A0A103YKJ2]	2.00058	7.32874e-16	1.34087e-14	20.7776	87.4219
Ccrd_017688	Calponin homology domain-containing protein [Uniprot/SPTREMBL Acc. A0A103Y7M8]	2.00002	5.93327e-05	0.000252017	0.21841	0.929266
Ccrd_016349	Galactose mutarotase-like domain-containing protein [Uniprot/SPTREMBL Acc. A0A118K332]	1.99925	4.34596e-16	8.1126e-15	17.7895	75.7958
Ccrd_024321	Uncharacterized protein [Uniprot/SPTREMBL Acc. A0A118DD57]	1.99606	2.15669e-14	3.39091e-13	10.3344	44.7216
Ccrd_011685		1.99512	8.50979e-17	1.70363e-15	2.30227	9.81672
Ccrd_014183	Pyruvate kinase [Uniprot/SPTREMBL Acc. A0A103YE62]	1.99445	3.63684e-15	6.22967e-14	57.5303	242.341
Ccrd_007031	Selenium-binding protein [Uniprot/SPTREMBL Acc. A0A103XHS5]	1.99385	2.58097e-23	8.6957e-22	56.842	238.728
Ccrd_021618		1.98791	0.000819454	0.00268055	0.182364	0.7934
Ccrd_006984	Pectate lyase [Uniprot/SPTREMBL Acc. A0A118JUG6]	1.98002	0.00465398	0.0124211	0.188878	0.822237
Ccrd_003000	Glycosyltransferase [Uniprot/SPTREMBL Acc. A0A124SCU8]	1.97579	4.79108e-12	5.95084e-11	4.11656	17.3016
Ccrd_019800		1.97459	1.55275e-09	1.43678e-08	29.2662	121.553
Ccrd_025841	Protein kinase domain-containing protein [Uniprot/SPTREMBL Acc. A0A103U2R6]	1.97339	1.79055e-10	1.86872e-09	1.3252	5.51284
Ccrd_025714	Glycosyltransferase [Uniprot/SPTREMBL Acc. A0A103VA32]	1.97322	1.10643e-16	2.18785e-15	12.0986	50.3748
Ccrd_008830	Uncharacterized protein [Uniprot/SPTREMBL Acc. A0A103XEH6]	1.97183	5.54623e-13	7.52164e-12	6.80831	28.2312
Ccrd_019262		1.97029	0.00130562	0.00405613	0.325119	1.36828
Ccrd_026870	Cyclin-like protein [Uniprot/SPTREMBL Acc. A0A118F1Q9]	1.96794	2.65997e-05	0.000121266	0.716916	3.03639
Ccrd_013953	Homeodomain-like protein [Uniprot/SPTREMBL Acc. A0A103YEL6]	1.9676	0.000677306	0.0022693	0.409571	1.77596
Ccrd_012823	FAD-binding PCMH-type domain-containing protein [Uniprot/SPTREMBL Acc. A0A103YGU2]	1.96622	8.82837e-13	1.18072e-11	3.16485	12.9903
Ccrd_001380	Aa_trans domain-containing protein [Uniprot/SPTREMBL Acc. A0A118JX20]	1.96614	7.96806e-15	1.31705e-13	15.3716	63.0957
Ccrd_019699	Mitochondrial Rho-like protein [Uniprot/SPTREMBL Acc. A0A103Y3Y1]	1.96461	2.10616e-11	2.42302e-10	2.32644	9.69706
Ccrd_024644	ANK_REP_REGION domain-containing protein [Uniprot/SPTREMBL Acc. A0A118JS36]	1.96325	1.66987e-08	1.3295e-07	1.54393	6.36039
Ccrd_018262	Major facilitator superfamily domain, general substrate transporter [Uniprot/SPTREMBL Acc. A0A103Y6I7]	1.9604	9.20871e-09	7.65932e-08	1.13615	4.64867
Ccrd_012382	MADS-box domain-containing protein [Uniprot/SPTREMBL Acc. A0A103YHI9]	1.95916	1.99328e-07	1.33754e-06	2.66722	11.0403
Ccrd_009752	Auxin efflux carrier component [Uniprot/SPTREMBL Acc. A0A118K778]	1.95914	1.11815e-12	1.48414e-11	1.5109	6.38814
Ccrd_022104	Aa_trans domain-containing protein [Uniprot/SPTREMBL Acc. A0A124SED2]	1.95801	0.0022658	0.00660213	0.632305	2.60615
Ccrd_008084	Peptidase C13, legumain [Uniprot/SPTREMBL Acc. A0A103XFU1]	1.95776	3.89175e-13	5.35676e-12	33.2801	134.526
Ccrd_016915		1.95684	2.7143e-14	4.22639e-13	0.536321	2.22301
Ccrd_009974	HSF_DOMAIN domain-containing protein [Uniprot/SPTREMBL Acc. A0A103YM29]	1.95253	3.54837e-09	3.13916e-08	0.579058	2.40507
Ccrd_011819	HMA domain-containing protein [Uniprot/SPTREMBL Acc. A0A103YIK6]	1.95106	2.82725e-05	0.000128228	0.7985	3.319
Ccrd_007226	Homeobox domain-containing protein [Uniprot/SPTREMBL Acc. A0A103XHB1]	1.94777	2.61325e-21	7.68048e-20	1.99314	8.2175
Ccrd_022897	WRKY domain-containing protein [Uniprot/SPTREMBL Acc. A0A103XXS1]	1.94764	7.51991e-16	1.37066e-14	7.9405	33.4188
Ccrd_008931	L-3-cyanoalanine synthase [Uniprot/SPTREMBL Acc. A0A103XE79]	1.94762	0.00135493	0.00418981	0.250623	1.01792
Ccrd_021829	Exostosin domain-containing protein [Uniprot/SPTREMBL Acc. A0A103XZW6]	1.94475	8.7503e-09	7.2972e-08	0.524685	2.16149
Ccrd_016099	Homeobox domain-containing protein [Uniprot/SPTREMBL Acc. A0A103YAI1]	1.94302	5.05829e-30	2.71103e-28	9.98087	40.8745
Ccrd_020809		1.94236	7.51672e-07	4.56121e-06	1.57213	6.45833
Ccrd_007832	L-lactate dehydrogenase [Uniprot/SPTREMBL Acc. A0A103XG52]	1.9379	2.38635e-11	2.72752e-10	44.2912	179.161
Ccrd_015219	Glycoside hydrolase, family 79 [Uniprot/SPTREMBL Acc. A0A118K3T2]	1.93392	1.88916e-20	5.27192e-19	4.84976	19.7723
Ccrd_017040		1.93248	0.000135867	0.00053645	9.00029	35.9501
Ccrd_007424		1.93193	1.59732e-19	4.14081e-18	12.9829	52.8583
Ccrd_016979		1.93181	3.00507e-06	1.63199e-05	1.64844	6.71895
Ccrd_000958	Beta-galactosidase [Uniprot/SPTREMBL Acc. A0A103XU73]	1.93177	0.00016794	0.000649738	0.216681	0.889566
Ccrd_005330	Uncharacterized protein [Uniprot/SPTREMBL Acc. A0A118JUL4]	1.92994	1.12351e-16	2.21936e-15	1.97589	8.06983
Ccrd_012618	Caffeoyl-CoA O-methyltransferase [Uniprot/SPTREMBL Acc. A0A103YH44]	1.92983	1.38144e-06	7.9915e-06	3.06849	12.0803
Ccrd_022666		1.9271	1.39134e-09	1.29548e-08	20.9577	83.0926
Ccrd_016709	Ribosomal protein L29 [Uniprot/SPTREMBL Acc. A0A103Y9E0]	1.92676	5.15658e-17	1.05639e-15	143.865	595.718
Ccrd_000331		1.925	1.43277e-13	2.07708e-12	4.05895	16.4721
Ccrd_025306		1.92446	0.00143324	0.00440868	0.597736	2.57188
Ccrd_006952		1.92121	0.00308872	0.00865942	0.279132	1.11489
Ccrd_025350	AP2/ERF domain-containing protein [Uniprot/SPTREMBL Acc. A0A124SAW9]	1.91863	4.47738e-10	4.43814e-09	19.9942	79.5885
Ccrd_001846	Ribosomal_L2_C domain-containing protein [Uniprot/SPTREMBL Acc. A0A103XSG3]	1.91798	4.07545e-05	0.000178805	0.498507	2.07813
Ccrd_011007		1.91587	2.58464e-06	1.42284e-05	1.15114	4.73498
Ccrd_003598	Auxin-responsive protein [Uniprot/SPTREMBL Acc. A0A103XPA1]	1.91365	2.53139e-14	3.94795e-13	51.331	211.155
Ccrd_001349		1.91315	8.64018e-11	9.33477e-10	9.24876	36.3452
Ccrd_016856		1.91208	4.80984e-23	1.58193e-21	13.9402	56.374
Ccrd_007157	AN1-type domain-containing protein [Uniprot/SPTREMBL Acc. A0A103XHJ4]	1.91178	1.27188e-09	1.18941e-08	255.974	1038.41
Ccrd_005400	Disease resistance protein [Uniprot/SPTREMBL Acc. A0A103XKU6]	1.91133	3.16577e-13	4.41404e-12	1.17396	4.63641
Ccrd_009830	Myc-type, basic helix-loop-helix (BHLH) domain-containing protein [Uniprot/SPTREMBL Acc. A0A118K757]	1.91012	9.45776e-07	5.633e-06	0.449287	1.82738
Ccrd_023220		1.90867	2.07361e-05	9.68166e-05	0.171841	0.694711
Ccrd_012844	Endoglucanase [Uniprot/SPTREMBL Acc. A0A103YGP7]	1.90829	0.00822024	0.0203132	0.120628	0.499417
Ccrd_016131	RING-type domain-containing protein [Uniprot/SPTREMBL Acc. A0A103YAH7]	1.90571	3.66045e-08	2.78589e-07	33.5771	133.02
Ccrd_014455	Protein kinase domain-containing protein [Uniprot/SPTREMBL Acc. A0A124SGQ8]	1.90433	6.51184e-05	0.000274422	0.702075	2.76904
Ccrd_004379	YjeF C-terminal domain, carbohydrate kinase-related protein [Uniprot/SPTREMBL Acc. A0A103XMU7]	1.90357	1.23786e-18	2.98101e-17	17.376	69.7859
Ccrd_000045		1.90242	0.00106249	0.00338064	0.183197	0.742416
Ccrd_000011	Morc6_S5 domain-containing protein [Uniprot/SPTREMBL Acc. A0A103XVZ0]	1.90198	0.000166739	0.000645686	0.140879	0.577731
Ccrd_011737	Mitochondrial carrier domain-containing protein [Uniprot/SPTREMBL Acc. A0A118K5Z3]	1.90164	5.3269e-16	9.88646e-15	7.35206	28.9812
Ccrd_021036	Amine oxidase [Uniprot/SPTREMBL Acc. A0A103Y1G7]	1.90057	6.7808e-11	7.40033e-10	3.33435	13.0113
Ccrd_016826	Ankyrin repeat-containing protein [Uniprot/SPTREMBL Acc. A0A118K2T8]	1.89983	4.2432e-12	5.30524e-11	2.53568	10.0671
Ccrd_008654	FKS1_dom1 domain-containing protein [Uniprot/SPTREMBL Acc. A0A103XEP4]	1.89953	6.40444e-06	3.28965e-05	0.838594	3.32771
Ccrd_006225	AB hydrolase-1 domain-containing protein [Uniprot/SPTREMBL Acc. A0A103XJH2]	1.89909	8.44458e-13	1.13017e-11	1.79428	7.22324
Ccrd_007140	Fatty acid desaturase, type 1 [Uniprot/SPTREMBL Acc. A0A118JTW1]	1.8978	8.09846e-05	0.000334436	0.383658	1.53246
Ccrd_011450	Chloramphenicol acetyltransferase-like domain-containing protein [Uniprot/SPTREMBL Acc. A0A118K646]	1.89575	9.20142e-20	2.43429e-18	2.23763	8.91594
Ccrd_006279	PPM-type phosphatase domain-containing protein [Uniprot/SPTREMBL Acc. A0A103XJE3]	1.89456	4.38319e-25	1.64915e-23	142.712	561.337
Ccrd_014096		1.89424	1.50573e-14	2.40656e-13	4.42665	17.2783
Ccrd_001659		1.88674	3.72288e-10	3.74593e-09	17.2123	68.2533
Ccrd_013264	Concanavalin A-like lectin/glucanase, subgroup [Uniprot/SPTREMBL Acc. A0A103YFY2]	1.88559	4.4314e-18	1.01299e-16	5.10467	20.4916
Ccrd_021753		1.88543	8.9724e-07	5.36873e-06	3.63403	13.9779
Ccrd_016865	Mini-chromosome maintenance complex-binding protein [Uniprot/SPTREMBL Acc. A0A103Y971]	1.88526	1.71639e-08	1.36317e-07	27.1154	108.253
Ccrd_015324	PARP catalytic domain-containing protein [Uniprot/SPTREMBL Acc. A0A118K3R6]	1.88092	1.14496e-12	1.51765e-11	16.8349	64.5285
Ccrd_005434	Uncharacterized protein [Uniprot/SPTREMBL Acc. A0A118JV51]	1.87717	0.00344717	0.00953443	0.084784	0.328554
Ccrd_013176	GUB_WAK_bind domain-containing protein [Uniprot/SPTREMBL Acc. A0A103YG37]	1.87526	7.63357e-11	8.27497e-10	1.822	7.14059
Ccrd_002313	Rubredoxin-type fold [Uniprot/SPTREMBL Acc. A0A103XRS5]	1.87486	2.37349e-13	3.35044e-12	3.09697	11.9443
Ccrd_023925	Pectinesterase [Uniprot/SPTREMBL Acc. A0A103GCH9]	1.87132	2.30585e-05	0.000106554	2.12438	8.51014
Ccrd_022730	ABC transporter domain-containing protein [Uniprot/SPTREMBL Acc. A0A103XY81]	1.86767	7.66408e-19	1.8881e-17	12.6669	49.3477
Ccrd_019154		1.86483	0.000140001	0.00055086	16.5856	63.9447
Ccrd_006292	Aldehyde dehydrogenase, conserved site-containing protein [Uniprot/SPTREMBL Acc. A0A103XIZ9]	1.86398	1.55192e-17	3.36464e-16	71.9228	274.871
Ccrd_022118	UDP-glucuronosyl/UDP-glucosyltransferase [Uniprot/SPTREMBL Acc. A0A103XZF0]	1.86205	1.73339e-15	3.06978e-14	45.4842	178.219
Ccrd_007711		1.85973	5.81156e-09	4.98402e-08	0.709761	2.76665
Ccrd_011461	LRRNT_2 domain-containing protein [Uniprot/SPTREMBL Acc. A0A118K664]	1.85909	0.000557856	0.0019054	0.344003	1.29829
Ccrd_013996		1.8547	0.00220552	0.00645274	0.207088	0.808648
Ccrd_014524	Uncharacterized protein [Uniprot/SPTREMBL Acc. A0A118K492]	1.84852	2.31467e-06	1.28667e-05	1.24338	4.74232
Ccrd_009871		1.84832	0.00159873	0.00485725	1.13267	4.46657
Ccrd_013390	Proteinase inhibitor I13, potato inhibitor I [Uniprot/SPTREMBL Acc. A0A103YFP3]	1.84819	5.96018e-06	3.07617e-05	11.3805	45.7164
Ccrd_003076	Receptor-like serine/threonine-protein kinase [Uniprot/SPTREMBL Acc. A0A124SCT9]	1.84818	9.37301e-05	0.000382012	3.2705	11.9811
Ccrd_022434		1.84788	1.50332e-06	8.62435e-06	0.329342	1.27363
Ccrd_004547		1.84702	5.88232e-05	0.000250128	0.543005	2.11563
Ccrd_007022	AP2/ERF domain-containing protein [Uniprot/SPTREMBL Acc. A0A118JU49]	1.84613	2.16735e-06	1.2114e-05	1.23662	4.79294
Ccrd_007260	Carboxypeptidase [Uniprot/SPTREMBL Acc. A0A118JTY6]	1.8402	4.61327e-20	1.24603e-18	6.5464	24.8303
Ccrd_000162		1.84007	1.86429e-09	1.70385e-08	5.37938	20.3165
Ccrd_019069	NPH3 domain-containing protein [Uniprot/SPTREMBL Acc. A0A118K1E0]	1.83787	5.83329e-16	1.07849e-14	1.79523	6.84438
Ccrd_003877	Pectinesterase [Uniprot/SPTREMBL Acc. A0A118JW10]	1.83487	2.803e-12	3.56862e-11	3.76422	14.2884
Ccrd_008569	Protein kinase domain-containing protein [Uniprot/SPTREMBL Acc. A0A124SB42]	1.83403	3.06159e-22	9.51898e-21	5.15062	19.6112
Ccrd_021120	Uncharacterized protein [Uniprot/SPTREMBL Acc. A0A103Y171]	1.83399	7.9037e-17	1.59189e-15	3.07147	11.6467
Ccrd_000448		1.83302	0.019336	0.0425754	1.44976	5.35699
Ccrd_000379	tRNA(adenine(34)) deaminase [Uniprot/SPTREMBL Acc. A0A103XV94]	1.83265	2.15955e-12	2.78238e-11	1.90789	7.43579
Ccrd_007709	Abhydrolase_2 domain-containing protein [Uniprot/SPTREMBL Acc. A0A103XGH1]	1.83064	1.53947e-05	7.37838e-05	0.627236	2.41806
Ccrd_011252	Glycoside hydrolase, catalytic domain-containing protein [Uniprot/SPTREMBL Acc. A0A103YJN8]	1.83063	1.86595e-19	4.805e-18	3.299	12.5528
Ccrd_016940	Cytochrome P450 [Uniprot/SPTREMBL Acc. A0A103Y901]	1.82881	0.00201442	0.00595397	0.140827	0.549467
Ccrd_020792	TPR_REGION domain-containing protein [Uniprot/SPTREMBL Acc. A0A118K090]	1.82834	4.42029e-18	1.01165e-16	2.64576	10.0605
Ccrd_010842	Cold acclimation protein WCOR413 [Uniprot/SPTREMBL Acc. A0A103YKH5]	1.82652	1.99042e-11	2.2926e-10	102.675	383.675
Ccrd_021819	Pectinesterase [Uniprot/SPTREMBL Acc. A0A103XZV9]	1.8254	0.00357466	0.00984484	0.250684	0.976056
Ccrd_020083	Exocyst complex component SEC5 [Uniprot/SPTREMBL Acc. A0A103Y350]	1.82384	3.44976e-05	0.000153403	0.457108	1.73056
Ccrd_016408	Peptidase S10, serine carboxypeptidase [Uniprot/SPTREMBL Acc. A0A103YA19]	1.82382	3.08001e-12	3.89564e-11	1.66982	6.28506
Ccrd_013269	ZT_dimer domain-containing protein [Uniprot/SPTREMBL Acc. A0A103YFW4]	1.82301	1.02242e-11	1.22355e-10	0.999568	3.78857
Ccrd_013784		1.82284	1.24738e-07	8.68989e-07	0.467562	1.79021
Ccrd_004086	NAC domain-containing protein [Uniprot/SPTREMBL Acc. A0A103XN85]	1.82181	4.2133e-16	7.8878e-15	2.71914	10.2176
Ccrd_001524	Terpene synthase, metal-binding domain-containing protein [Uniprot/SPTREMBL Acc. A0A103XT49]	1.8218	0.000200723	0.000763529	0.198223	0.750128
Ccrd_016831		1.8211	8.58105e-12	1.03074e-10	3.19975	12.2143
Ccrd_012670		1.82099	2.52892e-15	4.41365e-14	1.42405	5.38779
Ccrd_007676	ENT domain-containing protein [Uniprot/SPTREMBL Acc. A0A103XGM5]	1.81954	2.86693e-09	2.56209e-08	1.23969	4.6497
Ccrd_000770	Mitochodrial transcription termination factor-related protein [Uniprot/SPTREMBL Acc. A0A103XUG0]	1.81808	3.94478e-10	3.94866e-09	2.32195	8.73523
Ccrd_024114	Concanavalin A-like lectin/glucanase, subgroup [Uniprot/SPTREMBL Acc. A0A118JSA3]	1.81725	2.75031e-10	2.80973e-09	0.717158	2.71207
Ccrd_025483	NYN domain-containing protein [Uniprot/SPTREMBL Acc. A0A103WZA8]	1.81658	0.00137248	0.00423852	0.355964	1.3769
Ccrd_013028	Multi antimicrobial extrusion protein [Uniprot/SPTREMBL Acc. A0A103YGD9]	1.81607	2.06507e-16	3.98966e-15	25.9908	97.5461
Ccrd_021243		1.81491	4.7656e-15	8.07022e-14	29.3206	109.731
Ccrd_020687	Concanavalin A-like lectin/glucanase, subgroup [Uniprot/SPTREMBL Acc. A0A103Y201]	1.81396	2.87798e-12	3.65685e-11	4.88455	17.9363
Ccrd_015185	BHLH domain-containing protein [Uniprot/SPTREMBL Acc. A0A124SGI0]	1.81168	1.61451e-24	5.88003e-23	5.29465	19.8996
Ccrd_019423	Uncharacterized protein [Uniprot/SPTREMBL Acc. A0A103Y4E7]	1.81158	1.90033e-09	1.73351e-08	14.2308	54.685
Ccrd_016332	AP2/ERF domain-containing protein [Uniprot/SPTREMBL Acc. A0A103YA41]	1.80826	1.07777e-17	2.38752e-16	67.8717	254.853
Ccrd_000305	Peptidase A1 domain-containing protein [Uniprot/SPTREMBL Acc. A0A103XVC7]	1.80762	2.68402e-07	1.75774e-06	0.617931	2.30691
Ccrd_000735		1.80632	1.8267e-29	9.47093e-28	13.3305	49.8376
Ccrd_000664	Bestrophin/UPF0187 [Uniprot/SPTREMBL Acc. A0A103XUR8]	1.80558	0.00374214	0.0102579	0.24614	0.932622
Ccrd_007172	Uncharacterized protein [Uniprot/SPTREMBL Acc. A0A103XHI1]	1.80521	0.0197158	0.0432686	0.0228997	0.0860012
Ccrd_000459	Cytochrome P450 [Uniprot/SPTREMBL Acc. A0A103XV39]	1.80498	2.03227e-19	5.20556e-18	4.33038	16.0849
Ccrd_023673	BHLH domain-containing protein [Uniprot/SPTREMBL Acc. A0A103XWC4]	1.8027	3.27957e-11	3.68799e-10	4.26519	15.646
Ccrd_007740	ELK-like protein [Uniprot/SPTREMBL Acc. A0A103XGI5]	1.80244	7.71318e-23	2.51543e-21	19.8441	73.4919
Ccrd_016444		1.80035	0.00942433	0.0228966	2.29987	8.42488
Ccrd_000363		1.79732	1.52994e-16	2.98562e-15	7.74651	28.4191
Ccrd_013842		1.79691	1.47673e-06	8.48987e-06	20.9901	77.1256
Ccrd_009956		1.79539	1.85144e-09	1.69291e-08	7.0295	26.2036
Ccrd_015744	Concanavalin A-like lectin/glucanase, subgroup [Uniprot/SPTREMBL Acc. A0A118K3G2]	1.79537	0.0207638	0.0452997	0.0653591	0.254951
Ccrd_016696	CCT domain-containing protein [Uniprot/SPTREMBL Acc. A0A103Y9G5]	1.79433	1.97513e-13	2.82314e-12	2.71211	9.94575
Ccrd_012642	CCT domain-containing protein [Uniprot/SPTREMBL Acc. A0A103YH37]	1.79411	1.08322e-06	6.37116e-06	0.842191	3.18564
Ccrd_018753		1.79352	0.00297996	0.00838368	0.0499338	0.182737
Ccrd_005146		1.79211	0.00320195	0.00893296	0.0215456	0.0816195
Ccrd_018299	Carboxypeptidase [Uniprot/SPTREMBL Acc. A0A103Y6I3]	1.79136	2.72332e-18	6.39153e-17	18.2851	67.1123
Ccrd_021469	Protein kinase domain-containing protein [Uniprot/SPTREMBL Acc. A0A103Y0H9]	1.79066	1.50153e-15	2.68375e-14	3.16877	11.5394
Ccrd_001006		1.78694	1.3025e-16	2.55467e-15	2.58846	9.54817
Ccrd_025426	Uncharacterized protein [Uniprot/SPTREMBL Acc. A0A103X823]	1.78269	7.21412e-07	4.39137e-06	1.15091	4.1856
Ccrd_000978		1.78057	8.20036e-06	4.12986e-05	0.386567	1.44634
Ccrd_021201	CHCH domain-containing protein [Uniprot/SPTREMBL Acc. A0A103Y109]	1.7804	1.4876e-05	7.15818e-05	1.61206	5.91626
Ccrd_018667	Usp domain-containing protein [Uniprot/SPTREMBL Acc. A0A124SFF1]	1.78002	3.11895e-12	3.94231e-11	30.1748	109.514
Ccrd_006823	UAA transporter [Uniprot/SPTREMBL Acc. A0A103XIB7]	1.77941	4.56218e-06	2.41126e-05	1.26545	4.59786
Ccrd_021424	Sucrose-phosphate synthase [Uniprot/SPTREMBL Acc. A0A103Y0K9]	1.77891	4.03777e-07	2.57117e-06	0.330399	1.20725
Ccrd_002603	AB hydrolase-1 domain-containing protein [Uniprot/SPTREMBL Acc. A0A124SCZ0]	1.77727	3.64647e-15	6.24063e-14	5.50638	20.2335
Ccrd_016932	AAA+ ATPase domain-containing protein [Uniprot/SPTREMBL Acc. A0A103Y915]	1.77494	6.02904e-17	1.22603e-15	5.70852	20.6349
Ccrd_023590		1.77491	6.15113e-08	4.51448e-07	5.12196	18.8818
Ccrd_021249	DOG1 domain-containing protein [Uniprot/SPTREMBL Acc. A0A118JZX0]	1.77483	2.59897e-09	2.33123e-08	12.6686	46.2603
Ccrd_016888	DNA topoisomerase [Uniprot/SPTREMBL Acc. A0A103Y944]	1.77357	7.8523e-14	1.15744e-12	2.62625	9.631
Ccrd_012586	Histone acetyltransferase [Uniprot/SPTREMBL Acc. A0A118K5F7]	1.77317	1.81516e-11	2.09948e-10	0.393981	1.43459
Ccrd_016927	BAG domain-containing protein [Uniprot/SPTREMBL Acc. A0A103Y908]	1.77283	9.454e-25	3.51598e-23	7.90708	28.7566
Ccrd_016700		1.77226	8.3124e-11	8.99572e-10	0.342218	1.25154
Ccrd_013843		1.77182	2.07387e-10	2.14193e-09	3.83458	13.843
Ccrd_009667	Cytochrome c oxidase subunit 1 [Uniprot/SPTREMBL Acc. A0A118K798]	1.77093	0.00240733	0.00695973	1.27133	4.54015
Ccrd_006500	Ubiquinol oxidase [Uniprot/SPTREMBL Acc. A0A124SBR7]	1.77083	1.12132e-24	4.13839e-23	24.6889	89.6169
Ccrd_002888	Receptor-like serine/threonine-protein kinase [Uniprot/SPTREMBL Acc. A0A103XQI2]	1.77064	0.00104176	0.00332397	0.16396	0.618069
Ccrd_008690	WRKY domain-containing protein [Uniprot/SPTREMBL Acc. A0A103XEL6]	1.77034	9.07679e-06	4.5323e-05	1.12022	4.16548
Ccrd_008137		1.76988	1.85693e-10	1.93174e-09	0.487095	1.78456
Ccrd_004365		1.76924	0.00163797	0.00496182	0.780002	2.94375
Ccrd_004350	PABS domain-containing protein [Uniprot/SPTREMBL Acc. A0A103XN06]	1.76711	1.4859e-16	2.90555e-15	3.83051	14.0121
Ccrd_020453		1.76689	3.74923e-10	3.76461e-09	12.0638	43.8135
Ccrd_016415	Armadillo-type fold [Uniprot/SPTREMBL Acc. A0A103YA03]	1.76574	6.36472e-09	5.42235e-08	0.323258	1.18296
Ccrd_017484	Uncharacterized protein [Uniprot/SPTREMBL Acc. A0A103Y800]	1.76467	0.00566177	0.0147406	0.401338	1.46341
Ccrd_015552	Protein kinase domain-containing protein [Uniprot/SPTREMBL Acc. A0A124SGD9]	1.76318	2.3219e-05	0.000107245	0.419192	1.53399
Ccrd_021384	Peptidylprolyl isomerase [Uniprot/SPTREMBL Acc. A0A103Y0N7]	1.75829	7.98023e-08	5.74571e-07	0.722457	2.61851
Ccrd_001726		1.75814	2.58442e-07	1.70174e-06	2.1118	7.65096
Ccrd_015819	LEA_2 domain-containing protein [Uniprot/SPTREMBL Acc. A0A118K3D5]	1.75244	0.00829732	0.0204801	0.371659	1.33144
Ccrd_017735	Abhydrolase_3 domain-containing protein [Uniprot/SPTREMBL Acc. A0A103Y7I1]	1.75014	1.08144e-22	3.46832e-21	35.0761	125.211
Ccrd_006769		1.74924	7.00291e-15	1.16548e-13	1.66588	5.95384
Ccrd_001935	GATA transcription factor [Uniprot/SPTREMBL Acc. A0A118JWV4]	1.74764	7.13811e-13	9.6064e-12	13.259	47.5493
Ccrd_008956	Cytochrome b5 heme-binding domain-containing protein [Uniprot/SPTREMBL Acc. A0A103XE44]	1.74638	8.39519e-15	1.38646e-13	19.0591	68.1562
Ccrd_000714		1.74589	9.3676e-15	1.54179e-13	8.11044	29.1418
Ccrd_005324		1.74371	3.07595e-11	3.46653e-10	14.9973	53.3307
Ccrd_025009	Branched-chain-amino-acid aminotransferase [Uniprot/SPTREMBL Acc. A0A103XBJ4]	1.74189	1.05406e-16	2.09214e-15	2.62176	9.42287
Ccrd_013711		1.73784	5.19021e-07	3.23472e-06	1.16247	4.1641
Ccrd_026471		1.73632	2.26449e-12	2.90983e-11	4.94324	17.3621
Ccrd_012020	RING-type domain-containing protein [Uniprot/SPTREMBL Acc. A0A103YIF9]	1.73387	7.89138e-05	0.000326372	4.52603	16.6321
Ccrd_015004		1.73329	3.97476e-07	2.53355e-06	1.02301	3.65584
Ccrd_003924		1.73155	6.87848e-08	4.9971e-07	23.5684	82.3754
Ccrd_014432	O-fucosyltransferase family protein [Uniprot/SPTREMBL Acc. A0A103YDP5]	1.73099	1.74195e-13	2.50279e-12	4.84434	16.9365
Ccrd_026548		1.72982	0.000206732	0.000783458	0.87234	3.15291
Ccrd_011933	Kunitz inhibitor ST1-like protein [Uniprot/SPTREMBL Acc. A0A103YID5]	1.72874	1.9308e-07	1.29878e-06	236.679	816.85
Ccrd_008607	Remorin_C domain-containing protein [Uniprot/SPTREMBL Acc. A0A118JSL9]	1.72848	1.86734e-11	2.15597e-10	5.11715	17.7566
Ccrd_002208	Glycerophosphodiester phosphodiesterase [Uniprot/SPTREMBL Acc. A0A118JXE6]	1.72759	4.50863e-06	2.38491e-05	1.89358	6.54968
Ccrd_012931	4-coumarate--CoA ligase [Uniprot/SPTREMBL Acc. A0A103YGI1]	1.72758	4.94162e-12	6.1221e-11	20.4709	72.4738
Ccrd_017785	ATP-grasp fold [Uniprot/SPTREMBL Acc. A0A103Y7G6]	1.72129	9.89736e-15	1.6207e-13	10.8628	37.7372
Ccrd_011410	RNA polymerase sigma-70 [Uniprot/SPTREMBL Acc. A0A103YJK1]	1.72114	1.11055e-08	9.14303e-08	0.966768	3.37853
Ccrd_018624	Ankyrin repeat-containing protein [Uniprot/SPTREMBL Acc. A0A103Y5U2]	1.71764	1.5076e-08	1.20777e-07	0.850252	2.96984
Ccrd_011549	Cyclin [Uniprot/SPTREMBL Acc. A0A103YJB4]	1.71687	1.60328e-08	1.28123e-07	2.7254	9.61832
Ccrd_012954		1.71381	0.0113225	0.026943	0.854013	3.03043
Ccrd_001436		1.71223	0.000385949	0.00137431	0.870357	3.10565
Ccrd_019615		1.71176	9.01446e-07	5.39056e-06	2.57732	9.01796
Ccrd_010203		1.70873	0.0180487	0.0401107	0.273913	1.01368
Ccrd_016819	Phosphoinositide phospholipase C [Uniprot/SPTREMBL Acc. A0A103Y966]	1.7061	5.34177e-13	7.24944e-12	39.1448	137.618
Ccrd_000725		1.70555	6.12239e-21	1.76192e-19	60.2164	211.84
Ccrd_016708	ANK_REP_REGION domain-containing protein [Uniprot/SPTREMBL Acc. A0A103Y9F4]	1.70451	9.65303e-09	8.00775e-08	20.0742	70.44
Ccrd_006360	DYW_deaminase domain-containing protein [Uniprot/SPTREMBL Acc. A0A118JUR8]	1.70281	0.000157601	0.000613126	0.251196	0.879285
Ccrd_000057	Uncharacterized protein [Uniprot/SPTREMBL Acc. A0A118JYR3]	1.70237	1.65346e-16	3.22017e-15	2.14397	7.45037
Ccrd_025421	Uncharacterized protein [Uniprot/SPTREMBL Acc. A0A124S9Z3]	1.70161	1.39613e-05	6.74317e-05	2.10934	7.41154
Ccrd_014144		1.70079	1.49006e-17	3.24874e-16	3.53945	12.1612
Ccrd_015020	Cytochrome P450 [Uniprot/SPTREMBL Acc. A0A103YCL4]	1.70051	2.99174e-11	3.37755e-10	9.11622	30.9851
Ccrd_022590	CBFD_NFYB_HMF domain-containing protein [Uniprot/SPTREMBL Acc. A0A118JYW2]	1.69965	2.38075e-06	1.32189e-05	25.5455	87.7946
Ccrd_025704	Cytochrome b5 heme-binding domain-containing protein [Uniprot/SPTREMBL Acc. A0A103VEC4]	1.69719	2.87932e-06	1.57031e-05	8.03491	27.8351
Ccrd_024709	Homeobox, conserved site-containing protein [Uniprot/SPTREMBL Acc. A0A103XC05]	1.6962	2.07448e-10	2.14193e-09	2.18321	7.72714
Ccrd_012986		1.6961	0.000171135	0.000660596	1.02483	3.64325
Ccrd_019983	TIR domain-containing protein [Uniprot/SPTREMBL Acc. A0A124SF11]	1.69505	3.09157e-06	1.67567e-05	2.04662	7.11019
Ccrd_018521	Kinesin-like protein [Uniprot/SPTREMBL Acc. A0A103Y625]	1.69501	6.34926e-05	0.000268286	0.121122	0.420931
Ccrd_001244		1.69266	1.04006e-12	1.38334e-11	13.4519	46.8011
Ccrd_002430		1.68787	1.84821e-06	1.0451e-05	0.791728	2.72809
Ccrd_016766	Protein kinase domain-containing protein [Uniprot/SPTREMBL Acc. A0A118K2U2]	1.68709	7.32032e-19	1.80802e-17	20.198	70.3064
Ccrd_013502	Caffeate O-methyltransferase (COMT) family [Uniprot/SPTREMBL Acc. A0A103YFH8]	1.68703	0.00165196	0.00499598	0.272789	0.951825
Ccrd_019028	Rapid ALkalinization Factor [Uniprot/SPTREMBL Acc. A0A103Y531]	1.68538	1.09861e-05	5.39239e-05	34.5306	117.563
Ccrd_016923	Pyridoxal phosphate-dependent transferase [Uniprot/SPTREMBL Acc. A0A103Y917]	1.68528	6.85381e-20	1.83074e-18	6.20451	21.357
Ccrd_013500	Permease for cytosine/purines, uracil, thiamine, allantoin [Uniprot/SPTREMBL Acc. A0A118K4X5]	1.68356	3.15832e-17	6.6246e-16	3.59029	12.3061
Ccrd_004382	DUF3700 domain-containing protein [Uniprot/SPTREMBL Acc. A0A118JVS6]	1.68331	6.99314e-20	1.86538e-18	583.441	2005.52
Ccrd_024530	AAA+ ATPase domain-containing protein [Uniprot/SPTREMBL Acc. A0A103XCA9]	1.68049	1.4938e-11	1.74448e-10	0.786309	2.68506
Ccrd_016864	ADP,ATP carrier protein [Uniprot/SPTREMBL Acc. A0A103Y964]	1.68018	2.86363e-07	1.86904e-06	2.1007	7.27623
Ccrd_000706	FLZ-type domain-containing protein [Uniprot/SPTREMBL Acc. A0A118JXM1]	1.67908	6.30631e-16	1.16372e-14	13.7484	46.6809
Ccrd_018320	Protein kinase domain-containing protein [Uniprot/SPTREMBL Acc. A0A118K1V8]	1.67799	6.10245e-16	1.12718e-14	4.60094	15.7861
Ccrd_022835	ELK-like protein [Uniprot/SPTREMBL Acc. A0A103XXY4]	1.67665	1.21778e-07	8.51437e-07	13.667	46.1464
Ccrd_004101		1.67638	0.000549855	0.0018811	0.976529	3.36025
Ccrd_011833		1.67605	4.48097e-08	3.36273e-07	7.03335	23.7964
Ccrd_014416	GIGANTEA-like protein [Uniprot/SPTREMBL Acc. A0A103YDS3]	1.67244	7.33558e-18	1.65534e-16	11.6453	39.2992
Ccrd_000573	Uncharacterized protein [Uniprot/SPTREMBL Acc. A0A103XUU3]	1.67083	2.4718e-15	4.3299e-14	2.38415	8.12047
Ccrd_026841		1.66712	4.94723e-05	0.000213654	2.11089	7.31559
Ccrd_024707	Peptidase T2, asparaginase 2 [Uniprot/SPTREMBL Acc. A0A103XC17]	1.66664	4.65761e-12	5.79251e-11	2.34545	7.90817
Ccrd_000759	Uncharacterized protein [Uniprot/SPTREMBL Acc. A0A103XUJ9]	1.66407	0.00264178	0.00754991	0.876587	3.01341
Ccrd_000450		1.66359	8.39363e-23	2.72356e-21	13.4965	45.902
Ccrd_012628	AP2/ERF domain-containing protein [Uniprot/SPTREMBL Acc. A0A103YH48]	1.66177	0.00336267	0.00933141	0.279002	0.969838
Ccrd_016807	Arginyl-tRNA--protein transferase [Uniprot/SPTREMBL Acc. A0A103Y989]	1.66094	1.92809e-07	1.29785e-06	0.860847	2.93605
Ccrd_018921		1.65902	0.000476297	0.00165489	1.12764	3.79397
Ccrd_006329		1.65825	0.0197206	0.0432744	0.243473	0.862506
Ccrd_000079		1.65746	5.69877e-11	6.28327e-10	1.89586	6.33557
Ccrd_020230	Mitochondrial carrier domain-containing protein [Uniprot/SPTREMBL Acc. A0A103Y2V3]	1.65737	2.23562e-07	1.48726e-06	11.9984	39.5377
Ccrd_020346	Protein kinase domain-containing protein [Uniprot/SPTREMBL Acc. A0A103Y2M1]	1.65405	0.00145708	0.00447347	1.16353	3.96953
Ccrd_010834	Kinesin motor domain-containing protein [Uniprot/SPTREMBL Acc. A0A103YKC2]	1.65296	4.37328e-06	2.32221e-05	0.488598	1.67804
Ccrd_011447		1.65284	0.000707197	0.00235274	2.43503	8.2862
Ccrd_006853	BTB/POZ fold [Uniprot/SPTREMBL Acc. A0A118JU85]	1.65202	1.53692e-08	1.23074e-07	0.401611	1.35005
Ccrd_026731		1.65166	5.1847e-15	8.75693e-14	7.18995	24.3709
Ccrd_022560	Aldolase-type TIM barrel [Uniprot/SPTREMBL Acc. A0A118JYX8]	1.64978	6.82246e-18	1.54496e-16	26.23	87.646
Ccrd_017109	Caffeate O-methyltransferase (COMT) family [Uniprot/SPTREMBL Acc. A0A118K2L6]	1.6488	1.4135e-18	3.39153e-17	6.09043	20.3376
Ccrd_007069	NAC domain-containing protein [Uniprot/SPTREMBL Acc. A0A118JTK3]	1.64835	3.59073e-06	1.92945e-05	2.16225	7.26246
Ccrd_022089	Transcription factor, K-box [Uniprot/SPTREMBL Acc. A0A124SEC5]	1.64823	4.33521e-07	2.74701e-06	0.581272	1.96453
Ccrd_021910	BZIP domain-containing protein [Uniprot/SPTREMBL Acc. A0A118JZN9]	1.64722	4.53674e-12	5.65674e-11	48.8177	160.216
Ccrd_013302	Uncharacterized protein [Uniprot/SPTREMBL Acc. A0A118K501]	1.64555	1.01637e-05	5.01675e-05	5.251	18.2205
Ccrd_007927		1.64493	9.48408e-06	4.71619e-05	2.68639	8.85095
Ccrd_022036	ENTH domain-containing protein [Uniprot/SPTREMBL Acc. A0A103XZE8]	1.64318	3.77021e-14	5.76836e-13	5.08423	16.8738
Ccrd_014109	Cysteine peptidase, histidine active site-containing protein [Uniprot/SPTREMBL Acc. A0A124SGV0]	1.64182	4.5435e-07	2.86491e-06	1.06378	3.57175
Ccrd_019827		1.63997	0.003506	0.00967916	0.403152	1.39087
Ccrd_022961		1.63954	1.48123e-06	8.51275e-06	0.7773	2.60187
Ccrd_006366	Pectin acetylesterase [Uniprot/SPTREMBL Acc. A0A103XJ23]	1.63922	8.31309e-08	5.96759e-07	1.4654	4.8946
Ccrd_000167	Argonaute/Dicer protein, PAZ [Uniprot/SPTREMBL Acc. A0A103XVN7]	1.63899	4.42552e-07	2.79795e-06	0.394144	1.31255
Ccrd_019165	AAI domain-containing protein [Uniprot/SPTREMBL Acc. A0A124SF88]	1.63877	0.00022143	0.000833281	14.0724	47.154
Ccrd_000299	BAH domain-containing protein [Uniprot/SPTREMBL Acc. A0A103XVG1]	1.63863	7.86549e-08	5.6652e-07	3.0479	9.94635
Ccrd_007348	Bet_v_1 domain-containing protein [Uniprot/SPTREMBL Acc. A0A103XHE4]	1.63855	1.74888e-07	1.18216e-06	2.30952	7.67779
Ccrd_021851		1.63854	4.98882e-05	0.000215354	1.70885	5.75495
Ccrd_007665		1.63629	1.9805e-22	6.25831e-21	15.3399	50.7768
Ccrd_025036	LEA_2 domain-containing protein [Uniprot/SPTREMBL Acc. A0A124SAJ3]	1.6357	0.000206613	0.000783163	1.20591	4.04178
Ccrd_007009		1.63562	3.26713e-15	5.62628e-14	0.688344	2.28655
Ccrd_008478	CASP-like protein [Uniprot/SPTREMBL Acc. A0A103XF41]	1.63494	0.000648083	0.0021816	0.70459	2.41635
Ccrd_011025	Endoplasmic reticulum oxidoreductin 1 [Uniprot/SPTREMBL Acc. A0A124SHU0]	1.6339	2.62909e-07	1.72587e-06	1.86804	6.09017
Ccrd_006083		1.63351	7.14522e-24	2.49648e-22	8.99365	29.8139
Ccrd_016262	Maf1 regulator [Uniprot/SPTREMBL Acc. A0A103YAA5]	1.63306	6.0603e-15	1.01736e-13	8.03737	26.4516
Ccrd_006104		1.6316	1.27764e-06	7.42215e-06	0.61065	2.03054
Ccrd_003892		1.63146	9.96229e-16	1.80225e-14	5.6845	18.6531
Ccrd_023709	AAA+ ATPase domain-containing protein [Uniprot/SPTREMBL Acc. A0A103XWC2]	1.62786	7.21733e-07	4.39194e-06	0.700604	2.29306
Ccrd_016706	Uncharacterized protein [Uniprot/SPTREMBL Acc. A0A103Y9F7]	1.62779	5.85147e-14	8.77222e-13	2.78391	9.22622
Ccrd_017122	Glycoside hydrolase, catalytic domain-containing protein [Uniprot/SPTREMBL Acc. A0A118K2L1]	1.62692	1.99715e-10	2.0676e-09	1.58932	5.2125
Ccrd_002582		1.62677	9.30156e-15	1.53222e-13	2.66864	8.72252
Ccrd_009493	Glucose/ribitol dehydrogenase [Uniprot/SPTREMBL Acc. A0A124SIA7]	1.62611	0.00063395	0.00213998	0.410483	1.34809
Ccrd_019775		1.62583	0.000980022	0.00314358	0.847735	2.81566
Ccrd_001620		1.62564	4.90619e-09	4.26622e-08	26.2307	86.5818
Ccrd_018938	Non-heme dioxygenase N-terminal domain-containing protein [Uniprot/SPTREMBL Acc. A0A103Y5A5]	1.62509	1.31496e-12	1.73111e-11	32.2529	104.485
Ccrd_004691	HTH myb-type domain-containing protein [Uniprot/SPTREMBL Acc. A0A118JUZ1]	1.62423	1.0271e-08	8.48489e-08	1.33702	4.39436
Ccrd_016776		1.62368	2.0372e-23	6.88766e-22	23.885	78.949
Ccrd_016339		1.62238	8.01468e-07	4.84514e-06	1.25649	4.11234
Ccrd_006487		1.62095	0.00138216	0.00426581	0.548137	1.7615
Ccrd_000154		1.62014	2.3578e-08	1.83639e-07	4.98827	16.3492
Ccrd_015450		1.617	0.0016119	0.00489035	0.242582	0.813131
Ccrd_000218	PMEI domain-containing protein [Uniprot/SPTREMBL Acc. A0A103XVK9]	1.61571	5.73128e-06	2.9755e-05	27.5588	88.6058
Ccrd_003254	RRM domain-containing protein [Uniprot/SPTREMBL Acc. A0A124SCS1]	1.61475	4.47499e-10	4.43804e-09	15.0331	49.4884
Ccrd_002447		1.61397	5.79109e-07	3.57237e-06	1.02296	3.35649
Ccrd_001597	TLC domain-containing protein [Uniprot/SPTREMBL Acc. A0A103XSZ0]	1.612	0.0104957	0.0251956	0.205318	0.693147
Ccrd_013242	LEA_2 domain-containing protein [Uniprot/SPTREMBL Acc. A0A124SH43]	1.6117	6.39055e-12	7.8022e-11	411.047	1353.15
Ccrd_012221		1.61128	2.96133e-12	3.76029e-11	8.28415	27.1166
Ccrd_016854	Protein kinase domain-containing protein [Uniprot/SPTREMBL Acc. A0A103Y976]	1.61124	7.09286e-06	3.61351e-05	0.631725	2.07746
Ccrd_007307	Glycosyl transferase, family 29 [Uniprot/SPTREMBL Acc. A0A103XH88]	1.61038	2.26453e-14	3.55468e-13	4.81854	15.6051
Ccrd_000066	Two-component response regulator [Uniprot/SPTREMBL Acc. A0A103XVV0]	1.60777	0.000281643	0.00103431	0.176904	0.580233
Ccrd_004853	Extracellular ligand-binding receptor [Uniprot/SPTREMBL Acc. A0A118JVP7]	1.60775	1.9309e-17	4.13988e-16	1.0834	3.51544
Ccrd_020095	Peptidase A1 domain-containing protein [Uniprot/SPTREMBL Acc. A0A103Y342]	1.60701	4.17889e-08	3.15316e-07	19.1058	62.3208
Ccrd_014069	START domain-containing protein [Uniprot/SPTREMBL Acc. A0A103YEC4]	1.60583	5.43495e-08	4.03016e-07	51.4472	164.477
Ccrd_016860	Uncharacterized protein [Uniprot/SPTREMBL Acc. A0A118K2S3]	1.60166	1.12081e-08	9.21177e-08	8.79772	29.0344
Ccrd_024472	HTH myb-type domain-containing protein [Uniprot/SPTREMBL Acc. A0A103XCD3]	1.59826	6.99631e-06	3.56902e-05	0.55016	1.78772
Ccrd_008013		1.59816	0.000135284	0.000534255	0.294401	0.965067
Ccrd_020005		1.59702	0.00365458	0.0100415	1.85032	6.10565
Ccrd_016812		1.59371	8.71968e-16	1.58487e-14	12.4311	40.2877
Ccrd_000729	Peptidase_S9 domain-containing protein [Uniprot/SPTREMBL Acc. A0A103XUL7]	1.5935	2.48475e-15	4.34714e-14	7.91238	25.3091
Ccrd_006054	Cytochrome P450 [Uniprot/SPTREMBL Acc. A0A103XJL8]	1.59303	0.00476334	0.0126703	0.906627	2.91796
Ccrd_015650	Bicarbonate transporter, C-terminal [Uniprot/SPTREMBL Acc. A0A103YBE2]	1.59074	2.35864e-17	5.00699e-16	40.7787	131.989
Ccrd_023893		1.59046	0.000273699	0.00100955	3.08107	9.94373
Ccrd_011892	Aquaporin-like protein [Uniprot/SPTREMBL Acc. A0A118K5Y2]	1.59014	9.43155e-08	6.70823e-07	422.005	1359.71
Ccrd_011580	Chlorophyll A-B binding protein [Uniprot/SPTREMBL Acc. A0A103YJ09]	1.58979	0.00105612	0.00336204	0.412012	1.33898
Ccrd_014052	Uncharacterized protein [Uniprot/SPTREMBL Acc. A0A103YEF5]	1.58849	6.76796e-08	4.92236e-07	1.13976	3.69368
Ccrd_001694	Cupredoxin [Uniprot/SPTREMBL Acc. A0A103XSU0]	1.5864	2.00675e-10	2.07533e-09	5.91815	18.805
Ccrd_004700	4-coumarate--CoA ligase [Uniprot/SPTREMBL Acc. A0A103XM53]	1.58487	2.59371e-05	0.000118637	1.24081	3.92501
Ccrd_013845	Uncharacterized protein [Uniprot/SPTREMBL Acc. A0A124SGX7]	1.58431	1.7929e-20	5.01053e-19	16.2445	51.6448
Ccrd_008299		1.58413	4.24652e-07	2.69463e-06	1.03937	3.2685
Ccrd_011522		1.58304	1.70216e-10	1.78032e-09	11.6839	37.1743
Ccrd_011496	Peptidoglycan-binding lysin domain-containing protein [Uniprot/SPTREMBL Acc. A0A124SHP0]	1.58249	9.34734e-08	6.65323e-07	18.0557	56.9727
Ccrd_001749	SET domain-containing protein [Uniprot/SPTREMBL Acc. A0A118JXJ0]	1.5809	0.00484176	0.0128513	0.192621	0.627745
Ccrd_018371	Homeodomain-like protein [Uniprot/SPTREMBL Acc. A0A118K1U4]	1.57901	3.43985e-09	3.04594e-08	1.77138	5.72508
Ccrd_016082	Uncharacterized protein [Uniprot/SPTREMBL Acc. A0A103YAM6]	1.57876	1.63973e-07	1.11422e-06	0.73296	2.33987
Ccrd_000697	PPC domain-containing protein [Uniprot/SPTREMBL Acc. A0A103XUK6]	1.5751	0.000803098	0.00263608	3.69788	12.1121
Ccrd_002049		1.57423	2.6495e-13	3.72374e-12	5.18237	16.5003
Ccrd_024391		1.57388	0.00137671	0.00424968	0.365774	1.17879
Ccrd_015521	BHLH domain-containing protein [Uniprot/SPTREMBL Acc. A0A124SGE4]	1.57313	0.0184362	0.0408545	0.272271	0.909961
Ccrd_022295		1.5723	3.10114e-07	2.01386e-06	0.708171	2.24397
Ccrd_018414		1.57146	3.31191e-06	1.78509e-05	1.31408	4.21133
Ccrd_016302	Myb-like domain-containing protein [Uniprot/SPTREMBL Acc. A0A118K353]	1.57061	0.0070486	0.017835	0.529687	1.66146
Ccrd_018409	Peroxidase [Uniprot/SPTREMBL Acc. A0A118K1S9]	1.56995	4.5865e-07	2.89014e-06	25.707	80.9144
Ccrd_002602		1.56988	1.99695e-06	1.12494e-05	3.40652	10.8002
Ccrd_020927	Prenyltransferase/squalene oxidase [Uniprot/SPTREMBL Acc. A0A103Y1J0]	1.5695	0.000397731	0.00141029	0.377414	1.18899
Ccrd_018086	HTH myb-type domain-containing protein [Uniprot/SPTREMBL Acc. A0A103Y6X2]	1.56927	0.000149194	0.000584063	0.715735	2.24685
Ccrd_016901	Uncharacterized protein [Uniprot/SPTREMBL Acc. A0A118K2R4]	1.56836	3.0719e-20	8.46261e-19	14.0228	44.51
Ccrd_019674	Uncharacterized protein [Uniprot/SPTREMBL Acc. A0A103Y3U4]	1.56794	3.33184e-10	3.37177e-09	1.70925	5.39191
Ccrd_015158	Abhydro_lipase domain-containing protein [Uniprot/SPTREMBL Acc. A0A124SGI3]	1.56777	7.50661e-16	1.37066e-14	6.79583	21.2774
Ccrd_002816		1.56748	4.68992e-05	0.000203177	0.3166	1.01222
Ccrd_023285		1.56536	6.00302e-08	4.41416e-07	0.603557	1.88664
Ccrd_008353		1.56486	6.93482e-05	0.000290727	0.640396	2.02785
Ccrd_009653	Alpha crystallin/Hsp20 domain-containing protein [Uniprot/SPTREMBL Acc. A0A118K7B1]	1.5642	2.86278e-10	2.92155e-09	30.2526	93.6534
Ccrd_020665	Uncharacterized protein [Uniprot/SPTREMBL Acc. A0A103Y226]	1.56088	6.56957e-06	3.36643e-05	1.02439	3.26412
Ccrd_017404	AP2/ERF domain-containing protein [Uniprot/SPTREMBL Acc. A0A103Y863]	1.55768	7.54814e-16	1.37451e-14	22.7847	72.2806
Ccrd_016951	HSF_DOMAIN domain-containing protein [Uniprot/SPTREMBL Acc. A0A118K2Q4]	1.55696	1.79605e-06	1.01799e-05	5.63702	17.406
Ccrd_005456	AP2/ERF domain-containing protein [Uniprot/SPTREMBL Acc. A0A118JUR6]	1.55639	2.48749e-14	3.88262e-13	3.78489	11.9314
Ccrd_002256		1.55603	1.16154e-11	1.38404e-10	0.461675	1.45407
Ccrd_003919		1.55563	2.38194e-05	0.000109755	3.0893	9.47345
Ccrd_022113	Squalene monooxygenase [Uniprot/SPTREMBL Acc. A0A103XZA5]	1.5541	2.25006e-11	2.58089e-10	7.23991	22.9815
Ccrd_007251		1.55326	1.05792e-09	9.99958e-09	3.50731	11.163
Ccrd_017421	Uncharacterized protein [Uniprot/SPTREMBL Acc. A0A103Y839]	1.55319	0.000169457	0.000654769	15.9467	50.5251
Ccrd_000065		1.55263	1.8679e-06	1.055e-05	1.02284	3.27514
Ccrd_011096	NAC domain-containing protein [Uniprot/SPTREMBL Acc. A0A103YJX3]	1.55179	8.72691e-09	7.28083e-08	10.6204	32.8422
Ccrd_006591	KIX_2 domain-containing protein [Uniprot/SPTREMBL Acc. A0A103XIH9]	1.551	5.64311e-14	8.46642e-13	4.08011	12.8135
Ccrd_016264		1.55098	4.98474e-07	3.11268e-06	60.7129	187.412
Ccrd_026313	Armadillo-type fold [Uniprot/SPTREMBL Acc. A0A118JSD3]	1.55084	7.53667e-08	5.44662e-07	1.12734	3.54523
Ccrd_008499	Alpha-1,4 glucan phosphorylase [Uniprot/SPTREMBL Acc. A0A103XEZ2]	1.55069	2.33913e-15	4.1124e-14	4.32828	13.4727
Ccrd_003498		1.55049	1.07252e-08	8.83369e-08	3.82082	12.0913
Ccrd_000138	Mitochodrial transcription termination factor-related protein [Uniprot/SPTREMBL Acc. A0A103XVP4]	1.54878	1.55691e-07	1.06205e-06	1.33514	4.19719
Ccrd_022914	CCT domain-containing protein [Uniprot/SPTREMBL Acc. A0A124SE35]	1.54558	7.92062e-09	6.64831e-08	0.969415	3.01598
Ccrd_000159	O-fucosyltransferase family protein [Uniprot/SPTREMBL Acc. A0A103XVT0]	1.54494	0.00020727	0.000785343	0.452048	1.39895
Ccrd_025534	Ribosomal protein L10e/L16 [Uniprot/SPTREMBL Acc. A0A103WQL8]	1.54386	0.00673437	0.0171453	0.952484	2.96058
Ccrd_018415		1.54364	2.49873e-05	0.0001147	1.28954	4.03662
Ccrd_017436	RING-type domain-containing protein [Uniprot/SPTREMBL Acc. A0A103Y829]	1.5435	0.000313865	0.00114094	6.34937	19.5257
Ccrd_015044	Protein kinase domain-containing protein [Uniprot/SPTREMBL Acc. A0A103YCK5]	1.54157	3.79519e-20	1.03228e-18	7.14331	22.1687
Ccrd_012063		1.54054	4.10908e-09	3.60715e-08	2.02785	6.33109
Ccrd_012087	HTH myb-type domain-containing protein [Uniprot/SPTREMBL Acc. A0A103YI65]	1.53918	5.28054e-16	9.80983e-15	3.75869	11.7043
Ccrd_017641	ACT domain-containing protein [Uniprot/SPTREMBL Acc. A0A118K2A7]	1.53785	3.48443e-14	5.3523e-13	7.55987	23.181
Ccrd_000791	Photosynthetic reaction centre, L/M [Uniprot/SPTREMBL Acc. A0A103XUI1]	1.53782	0.0230965	0.0495039	0.448347	1.46578
Ccrd_019009	Protein kinase domain-containing protein [Uniprot/SPTREMBL Acc. A0A103Y564]	1.53469	1.54595e-07	1.05606e-06	1.77734	5.62528
Ccrd_000274	Glycosyl transferase, family 14 [Uniprot/SPTREMBL Acc. A0A118JXU9]	1.53442	2.64584e-10	2.71012e-09	1.83329	5.61635
Ccrd_007702	BZIP domain-containing protein [Uniprot/SPTREMBL Acc. A0A103XGP8]	1.5334	1.48055e-18	3.54361e-17	15.1348	46.4076
Ccrd_019582		1.53317	7.91046e-17	1.59189e-15	30.2869	94.2316
Ccrd_006055	Cytochrome P450 [Uniprot/SPTREMBL Acc. A0A103XJH3]	1.53182	1.01836e-06	6.03184e-06	0.424012	1.29692
Ccrd_011740	Major facilitator superfamily domain, general substrate transporter [Uniprot/SPTREMBL Acc. A0A118K5Z8]	1.5302	0.000898973	0.00290918	0.344533	1.0796
Ccrd_023840	Ribosomal protein L34 [Uniprot/SPTREMBL Acc. A0A103XW27]	1.53012	0.000593652	0.00201415	0.928474	2.88045
Ccrd_020674	GMC_OxRdtase_N domain-containing protein [Uniprot/SPTREMBL Acc. A0A103Y1Z9]	1.5292	0.000245642	0.000916726	1.42078	4.25164
Ccrd_006120	BTB domain-containing protein [Uniprot/SPTREMBL Acc. A0A103XJI6]	1.5287	2.29283e-06	1.276e-05	0.909608	2.81338
Ccrd_003764	Mlo-related protein [Uniprot/SPTREMBL Acc. A0A103XNN4]	1.52819	0.00443315	0.0119206	0.386673	1.19711
Ccrd_015721		1.52633	1.65935e-08	1.32221e-07	2.58553	8.02265
Ccrd_003434	4-coumarate--CoA ligase [Uniprot/SPTREMBL Acc. A0A103XPK6]	1.52595	4.78856e-07	3.00474e-06	2.57973	7.82598
Ccrd_019152	Expansin [Uniprot/SPTREMBL Acc. A0A118K1J4]	1.52565	5.2635e-10	5.16705e-09	3.281	10.0887
Ccrd_004102		1.52495	0.000476419	0.00165502	0.943619	2.87825
Ccrd_015196	AAA+ ATPase domain-containing protein [Uniprot/SPTREMBL Acc. A0A103YCB9]	1.52482	1.27264e-17	2.7936e-16	9.43195	28.9117
Ccrd_014933	Kinesin motor domain-containing protein [Uniprot/SPTREMBL Acc. A0A103YCT0]	1.52392	1.39817e-17	3.05874e-16	7.96342	24.6449
Ccrd_005503	TAZ-type domain-containing protein [Uniprot/SPTREMBL Acc. A0A103XKI9]	1.52062	7.604e-14	1.12426e-12	20.4975	62.0451
Ccrd_016827	Phosphoribosylanthranilate isomerase [Uniprot/SPTREMBL Acc. A0A103Y994]	1.5181	5.68993e-10	5.56026e-09	6.56213	20.1161
Ccrd_023078	ABC transporter domain-containing protein [Uniprot/SPTREMBL Acc. A0A118JYI8]	1.5177	1.30545e-19	3.40703e-18	15.7602	47.902
Ccrd_014719	Heat shock protein 70, conserved site-containing protein [Uniprot/SPTREMBL Acc. A0A103YD73]	1.51491	0.00174642	0.00524205	0.264213	0.81083
Ccrd_006376	Uncharacterized protein [Uniprot/SPTREMBL Acc. A0A118JUJ7]	1.51387	1.74315e-09	1.59615e-08	1.27358	3.95112
Ccrd_001438	Bet_v_1 domain-containing protein [Uniprot/SPTREMBL Acc. A0A118JX73]	1.51215	6.72365e-19	1.66277e-17	226.793	691.741
Ccrd_021192		1.51165	2.24266e-05	0.000103982	9.5835	28.1517
Ccrd_016384		1.51135	1.73945e-10	1.81683e-09	2.68981	8.17845
Ccrd_007070		1.51128	0.00070865	0.00235636	0.54765	1.64856
Ccrd_006019	Aquaporin-like protein [Uniprot/SPTREMBL Acc. A0A103XJM0]	1.5103	0.00396497	0.0107831	3.64406	11.762
Ccrd_007289	Alkaline/neutral invertase [Uniprot/SPTREMBL Acc. A0A124SBH5]	1.50974	3.28541e-10	3.32826e-09	2.76216	8.28265
Ccrd_013831		1.5082	6.80403e-10	6.60227e-09	2.73588	8.2255
Ccrd_007412	Nucleotide-binding, alpha-beta plait [Uniprot/SPTREMBL Acc. A0A118JTM8]	1.50818	0.000330068	0.00119446	0.845591	2.58455
Ccrd_007534	HECT domain-containing protein [Uniprot/SPTREMBL Acc. A0A118JTU4]	1.50711	3.15556e-10	3.20343e-09	1.63561	4.93939
Ccrd_011230		1.50669	5.89186e-06	3.04659e-05	1.63385	4.99546
Ccrd_016745	Heat shock protein 70, conserved site-containing protein [Uniprot/SPTREMBL Acc. A0A124SG09]	1.50632	1.00762e-06	5.97557e-06	2.71054	8.19807
Ccrd_006934	Chaperonin Cpn60 [Uniprot/SPTREMBL Acc. A0A103XI05]	1.50531	8.14721e-18	1.82995e-16	5.91824	17.925
Ccrd_012306	Nodulin-like domain-containing protein [Uniprot/SPTREMBL Acc. A0A118K5L6]	1.50316	8.20636e-08	5.89535e-07	10.0441	29.7558
Ccrd_012101	RING-CH-type domain-containing protein [Uniprot/SPTREMBL Acc. A0A124SHH2]	1.50315	7.08814e-18	1.60137e-16	3.31839	10.11
Ccrd_006162	Endoglucanase [Uniprot/SPTREMBL Acc. A0A124SBV1]	1.50169	7.88089e-06	3.98662e-05	2.7391	8.51351
Ccrd_000029	MADS-box domain-containing protein [Uniprot/SPTREMBL Acc. A0A103XVU4]	1.50129	8.20783e-07	4.95261e-06	2.5242	7.51691
Ccrd_006151	WD_REPEATS_REGION domain-containing protein [Uniprot/SPTREMBL Acc. A0A103XJD2]	1.49976	6.69625e-08	4.88122e-07	0.667582	2.02063
Ccrd_013512	Uncharacterized protein [Uniprot/SPTREMBL Acc. A0A124SH14]	1.49926	0.000407184	0.00143959	0.210572	0.637958
Ccrd_016724		1.49902	0.0145958	0.0334202	1.14677	3.64251
Ccrd_024167	Terpene synthase, metal-binding domain-containing protein [Uniprot/SPTREMBL Acc. A0A103D5F2]	1.49859	0.00020934	0.000792254	0.686503	2.07867
Ccrd_015371	DYW_deaminase domain-containing protein [Uniprot/SPTREMBL Acc. A0A103YBZ4]	1.49756	0.00815538	0.0201786	0.497234	1.47475
Ccrd_017429	Protein kinase domain-containing protein [Uniprot/SPTREMBL Acc. A0A103Y843]	1.49754	0.00381946	0.0104461	0.369166	1.09349
Ccrd_021599	CHY-type domain-containing protein [Uniprot/SPTREMBL Acc. A0A118K095]	1.49693	4.40457e-11	4.90103e-10	5.71553	16.9953
Ccrd_016104	bPH_2 domain-containing protein [Uniprot/SPTREMBL Acc. A0A118K372]	1.49626	3.0559e-06	1.65866e-05	4.08745	12.4294
Ccrd_011064		1.49568	2.6273e-11	2.98352e-10	5.13004	15.2575
Ccrd_016900	Hexosyltransferase [Uniprot/SPTREMBL Acc. A0A103Y931]	1.49472	3.73001e-20	1.01598e-18	25.6188	76.9094
Ccrd_013497		1.49448	1.93079e-08	1.51972e-07	8.56397	25.3576
Ccrd_021528	AN1-type domain-containing protein [Uniprot/SPTREMBL Acc. A0A103Y0F6]	1.49269	7.09224e-08	5.14274e-07	91.9622	273.231
Ccrd_020909		1.49243	0.000609181	0.00206213	2.31057	7.08899
Ccrd_013832		1.49044	3.87767e-07	2.47656e-06	0.731833	2.19138
Ccrd_012424	Glycosyltransferase [Uniprot/SPTREMBL Acc. A0A118K5J1]	1.48815	3.28138e-12	4.1422e-11	5.18956	15.5903
Ccrd_008652	Uncharacterized protein [Uniprot/SPTREMBL Acc. A0A103XEN8]	1.48544	1.14316e-12	1.5163e-11	3.54252	10.6619
Ccrd_005494		1.48454	1.56713e-07	1.06864e-06	2.92738	8.87721
Ccrd_016093		1.48424	4.80958e-12	5.96999e-11	31.9344	94.3344
Ccrd_017074	Uncharacterized protein [Uniprot/SPTREMBL Acc. A0A124SFX4]	1.48172	5.02068e-06	2.6363e-05	0.368345	1.10312
Ccrd_010758	GH10 domain-containing protein [Uniprot/SPTREMBL Acc. A0A103YKN7]	1.48123	7.93338e-14	1.1685e-12	53.4133	158.526
Ccrd_021092	F-box domain-containing protein [Uniprot/SPTREMBL Acc. A0A103Y180]	1.47978	0.0030612	0.00858976	1.74697	5.20179
Ccrd_020082	Exocyst complex component SEC5 [Uniprot/SPTREMBL Acc. A0A103Y328]	1.47889	8.17715e-08	5.87655e-07	1.40939	4.19132
Ccrd_014769	Pectate lyase [Uniprot/SPTREMBL Acc. A0A103YD34]	1.47794	2.05469e-13	2.93035e-12	11.6742	35.2169
Ccrd_019860		1.47745	0.00209234	0.00615137	0.887913	2.71874
Ccrd_013533	NB-ARC domain-containing protein [Uniprot/SPTREMBL Acc. A0A118K4V0]	1.47728	4.18809e-05	0.000183243	0.215708	0.643632
Ccrd_013443	Histone deacetylase [Uniprot/SPTREMBL Acc. A0A103YFM1]	1.47682	2.284e-07	1.51632e-06	1.84824	5.49211
Ccrd_024645		1.47593	3.39926e-05	0.000151575	0.358451	1.06764
Ccrd_004508	Peroxidase [Uniprot/SPTREMBL Acc. A0A103XMW2]	1.47547	0.000673097	0.00225794	3.30835	9.75928
Ccrd_013536		1.47543	4.23768e-05	0.000185203	0.244987	0.737643
Ccrd_007170	4-coumarate--CoA ligase [Uniprot/SPTREMBL Acc. A0A118JU17]	1.47279	2.03103e-10	2.09931e-09	1.47029	4.30585
Ccrd_012370		1.47265	0.00780285	0.0194384	0.343129	1.05332
Ccrd_005645		1.47256	2.17754e-12	2.80369e-11	8.1297	24.0906
Ccrd_011074		1.47222	5.22303e-12	6.4452e-11	5.85141	17.2942
Ccrd_018500	Mitochondrial carrier domain-containing protein [Uniprot/SPTREMBL Acc. A0A103Y648]	1.47131	0.00722805	0.0182104	0.215073	0.642273
Ccrd_026720	Peptidase A1 domain-containing protein [Uniprot/SPTREMBL Acc. A0A103L2C3]	1.471	5.8736e-06	3.03959e-05	22.3403	64.2175
Ccrd_006998		1.47071	5.47889e-08	4.05497e-07	0.491666	1.4774
Ccrd_020765		1.46948	1.22992e-07	8.58059e-07	2.08057	6.12532
Ccrd_016762	Homeodomain-like protein [Uniprot/SPTREMBL Acc. A0A118K2U3]	1.46862	2.70745e-12	3.45151e-11	4.59694	13.4252
Ccrd_007024	Purple acid phosphatase [Uniprot/SPTREMBL Acc. A0A103XHP6]	1.46542	1.22571e-10	1.3017e-09	9.78471	28.3656
Ccrd_016703		1.46466	5.60229e-07	3.46697e-06	2.36893	7.06906
Ccrd_001959		1.4645	1.11196e-15	2.0004e-14	16.9688	49.7593
Ccrd_006052	Cytochrome P450 [Uniprot/SPTREMBL Acc. A0A103XJL1]	1.46435	1.17338e-09	1.10155e-08	13.4149	38.7675
Ccrd_004051	AP2/ERF domain-containing protein [Uniprot/SPTREMBL Acc. A0A103XN55]	1.46274	0.000349644	0.00125847	1.06918	3.16827
Ccrd_007153	Lipoxygenase [Uniprot/SPTREMBL Acc. A0A118JTT8]	1.46236	9.70375e-06	4.81676e-05	2.27656	6.72064
Ccrd_020294		1.4623	0.00194586	0.00577073	0.500406	1.48658
Ccrd_016596	Alkaline/neutral invertase [Uniprot/SPTREMBL Acc. A0A103Y9P1]	1.46176	2.60082e-06	1.43134e-05	0.950737	2.78414
Ccrd_022487	Uncharacterized protein [Uniprot/SPTREMBL Acc. A0A103XYI4]	1.46155	3.95981e-18	9.12739e-17	3.54541	10.4707
Ccrd_016893	Dak kinase [Uniprot/SPTREMBL Acc. A0A103Y956]	1.46153	3.72142e-13	5.14061e-12	6.59978	19.4229
Ccrd_023801	CASP-like protein [Uniprot/SPTREMBL Acc. A0A103XW80]	1.45897	0.00082479	0.00269664	3.4017	9.86219
Ccrd_002008		1.45835	6.61185e-05	0.000278213	11.5454	33.3847
Ccrd_004362	Sulfate adenylyltransferase [Uniprot/SPTREMBL Acc. A0A103XMS0]	1.45801	9.9753e-11	1.06936e-09	64.1134	186.818
Ccrd_000054	RNA helicase [Uniprot/SPTREMBL Acc. A0A124SDS3]	1.4566	3.3422e-16	6.33674e-15	3.04146	8.88205
Ccrd_025852	NAC domain-containing protein [Uniprot/SPTREMBL Acc. A0A118IN54]	1.45658	2.12684e-10	2.18911e-09	1.97581	5.81364
Ccrd_011062	Concanavalin A-like lectin/glucanase, subgroup [Uniprot/SPTREMBL Acc. A0A103YJZ5]	1.45397	2.98962e-15	5.18066e-14	31.4886	91.2751
Ccrd_007338		1.45379	1.23725e-07	8.62865e-07	4.19336	12.2635
Ccrd_001141	WRKY domain-containing protein [Uniprot/SPTREMBL Acc. A0A103XTV6]	1.45334	1.09082e-15	1.96786e-14	22.2478	64.5643
Ccrd_001375		1.45304	4.65498e-07	2.92756e-06	1.94916	5.73545
Ccrd_016092	1,4-alpha-D-glucan glucanohydrolase [Uniprot/SPTREMBL Acc. A0A118K382]	1.45219	5.86793e-10	5.72552e-09	1.39713	4.05836
Ccrd_007839	PH domain-containing protein [Uniprot/SPTREMBL Acc. A0A124SBB8]	1.45204	3.58679e-15	6.14938e-14	4.63055	13.564
Ccrd_011129	BZIP domain-containing protein [Uniprot/SPTREMBL Acc. A0A103YJU7]	1.45044	0.0011007	0.00348728	1.39867	4.16458
Ccrd_014001	TPT domain-containing protein [Uniprot/SPTREMBL Acc. A0A118K4J2]	1.45019	1.16924e-05	5.71152e-05	0.973996	2.84117
Ccrd_023474		1.44948	1.38033e-08	1.11272e-07	7.97251	22.9293
Ccrd_013633	DNA replication ATP-dependent helicase/nuclease [Uniprot/SPTREMBL Acc. A0A103YF88]	1.44941	0.00121828	0.00381667	0.481833	1.40356
Ccrd_013766	Peptidase A1 domain-containing protein [Uniprot/SPTREMBL Acc. A0A103YF06]	1.44925	0.000152125	0.000594092	0.798401	2.34833
Ccrd_012496	Cysteine dioxygenase [Uniprot/SPTREMBL Acc. A0A103YHA9]	1.44893	4.68578e-15	7.95596e-14	151.684	437.833
Ccrd_024152	Uncharacterized protein [Uniprot/SPTREMBL Acc. A0A124SAR6]	1.44813	0.000688554	0.00230061	0.400406	1.16751
Ccrd_000586	Uncharacterized protein [Uniprot/SPTREMBL Acc. A0A103XUW8]	1.44703	0.00123786	0.00387175	0.36366	1.07586
Ccrd_003882	LOR/SDH bifunctional enzyme, conserved domain-containing protein [Uniprot/SPTREMBL Acc. A0A118JW25]	1.4469	5.59047e-11	6.1709e-10	8.90868	25.53
Ccrd_018817	Cytochrome P450 [Uniprot/SPTREMBL Acc. A0A124SFD3]	1.44668	3.31344e-05	0.000148193	40.5498	118.28
Ccrd_015938		1.44497	1.84461e-16	3.57444e-15	18.8774	54.4811
Ccrd_019945	Cyclic nucleotide-binding domain-containing protein [Uniprot/SPTREMBL Acc. A0A118K0S9]	1.44469	4.94847e-07	3.09504e-06	2.10539	6.19822
Ccrd_008187	WD_REPEATS_REGION domain-containing protein [Uniprot/SPTREMBL Acc. A0A103XFQ3]	1.4432	8.40389e-05	0.000346014	0.690554	2.0245
Ccrd_013248		1.44311	4.97373e-11	5.51214e-10	433.877	1245.9
Ccrd_006499	Ubiquinol oxidase [Uniprot/SPTREMBL Acc. A0A124SBR6]	1.44308	9.03394e-16	1.64045e-14	93.1898	271.694
Ccrd_006855	E3 ubiquitin ligase [Uniprot/SPTREMBL Acc. A0A103XI15]	1.44303	2.66309e-12	3.39719e-11	7.3481	21.1858
Ccrd_023338	Mitogen-activated protein kinase [Uniprot/SPTREMBL Acc. A0A103XWZ4]	1.44103	7.66453e-10	7.37068e-09	2.70455	7.76249
Ccrd_023667		1.44057	5.90423e-06	3.05054e-05	0.775095	2.26211
Ccrd_015045		1.43989	7.05386e-08	5.11875e-07	5.52199	15.9316
Ccrd_013314	RING-type E3 ubiquitin transferase [Uniprot/SPTREMBL Acc. A0A103YFT5]	1.43974	7.59746e-11	8.24046e-10	2.68134	7.79524
Ccrd_022836	KNOX2 domain-containing protein [Uniprot/SPTREMBL Acc. A0A103XXU3]	1.43973	4.20192e-09	3.6853e-08	15.8408	45.3843
Ccrd_001705	Calcium-binding EF-hand [Uniprot/SPTREMBL Acc. A0A103XST1]	1.43809	0.0108518	0.0259347	2.37172	7.10179
Ccrd_024149		1.43778	0.0102648	0.0246997	1.03507	2.99051
Ccrd_007921		1.43691	0.0161441	0.036469	0.254643	0.748021
Ccrd_021132	Uncharacterized protein [Uniprot/SPTREMBL Acc. A0A118K033]	1.43645	5.42621e-09	4.68471e-08	1.30574	3.75858
Ccrd_006069	RING-type domain-containing protein [Uniprot/SPTREMBL Acc. A0A103XJU3]	1.43611	9.31644e-08	6.63367e-07	7.84286	22.4781
Ccrd_001428	Bet_v_1 domain-containing protein [Uniprot/SPTREMBL Acc. A0A103XTA2]	1.43504	4.95827e-08	3.70367e-07	37.0656	104.704
Ccrd_025812	Fe2OG dioxygenase domain-containing protein [Uniprot/SPTREMBL Acc. A0A103UHV1]	1.43433	3.48614e-05	0.000154914	2.50961	7.31638
Ccrd_008295	Ethylene receptor [Uniprot/SPTREMBL Acc. A0A118JTF2]	1.43342	4.40324e-13	6.01371e-12	8.35881	23.861
Ccrd_012518		1.4329	2.94386e-05	0.00013311	0.402652	1.15779
Ccrd_001519	HARP domain-containing protein [Uniprot/SPTREMBL Acc. A0A103XT78]	1.43262	2.4215e-07	1.60155e-06	3.61388	10.4699
Ccrd_004637	Calcium-binding EF-hand [Uniprot/SPTREMBL Acc. A0A103XMB3]	1.43085	0.000856576	0.00278643	2.20298	6.46326
Ccrd_011862	ABC transporter domain-containing protein [Uniprot/SPTREMBL Acc. A0A124SHJ4]	1.43012	3.7367e-17	7.7787e-16	10.1081	29.0678
Ccrd_000004	DNA-directed RNA polymerase [Uniprot/SPTREMBL Acc. A0A103XW00]	1.42989	0.00651688	0.0166728	1.23384	3.51048
Ccrd_012764	Glutamine amidotransferase type-1 domain-containing protein [Uniprot/SPTREMBL Acc. A0A118K5B9]	1.42983	4.19142e-16	7.85444e-15	3.76459	10.8091
Ccrd_016214		1.42884	3.40448e-15	5.85238e-14	113.035	324.524
Ccrd_006264	Leucine-rich repeat-containing protein [Uniprot/SPTREMBL Acc. A0A118JUZ5]	1.42869	1.09755e-15	1.97815e-14	13.9787	39.9006
Ccrd_016759	PPM-type phosphatase domain-containing protein [Uniprot/SPTREMBL Acc. A0A103Y9C3]	1.42692	0.00458415	0.0122686	1.0944	3.15743
Ccrd_023171		1.42554	5.54157e-05	0.000237046	4.62645	13.0227
Ccrd_025813	Zeta_toxin domain-containing protein [Uniprot/SPTREMBL Acc. A0A118JSV0]	1.42505	4.19123e-06	2.23228e-05	3.68578	10.6839
Ccrd_013612		1.42465	8.69216e-05	0.00035682	11.1757	31.0035
Ccrd_014582		1.42427	0.000126746	0.000503315	0.989431	2.82076
Ccrd_000026		1.42357	0.00029744	0.00108655	1.55755	4.47222
Ccrd_017512	Hydroxymethylglutaryl-CoA reductase (NADPH) [Uniprot/SPTREMBL Acc. A0A103Y805]	1.42305	0.000469664	0.00163625	11.2126	31.1628
Ccrd_014793		1.4228	2.38011e-09	2.14587e-08	153.239	433.058
Ccrd_019527	BZIP domain-containing protein [Uniprot/SPTREMBL Acc. A0A103Y458]	1.42249	0.00219512	0.00642523	1.1146	3.27329
Ccrd_018133		1.4219	0.00895746	0.0219221	0.406278	1.14422
Ccrd_019725	Uncharacterized protein [Uniprot/SPTREMBL Acc. A0A103Y3T4]	1.42108	1.85537e-14	2.94106e-13	10.8299	30.971
Ccrd_012123	HTH myb-type domain-containing protein [Uniprot/SPTREMBL Acc. A0A103YI56]	1.42074	1.07757e-14	1.76006e-13	18.0125	51.8797
Ccrd_016775	Methyltransferase [Uniprot/SPTREMBL Acc. A0A103Y9B2]	1.4198	3.63988e-11	4.07123e-10	9.99808	28.6255
Ccrd_002551	HATPase_c domain-containing protein [Uniprot/SPTREMBL Acc. A0A103XR66]	1.41866	8.25493e-05	0.000340388	0.987258	2.82949
Ccrd_016774	NTP_transf_2 domain-containing protein [Uniprot/SPTREMBL Acc. A0A103Y9C1]	1.41857	1.02871e-09	9.74732e-09	15.1598	43.2451
Ccrd_016777	CASP-like protein [Uniprot/SPTREMBL Acc. A0A103Y9C0]	1.41856	6.84398e-14	1.01734e-12	9.11658	26.1699
Ccrd_020153	Uncharacterized protein [Uniprot/SPTREMBL Acc. A0A103Y304]	1.41781	1.72715e-12	2.2402e-11	4.36029	12.4708
Ccrd_009696		1.41612	0.0180552	0.0401206	1.05367	3.01172
Ccrd_021508	Peroxidase [Uniprot/SPTREMBL Acc. A0A103Y0D9]	1.41593	0.000217431	0.000819826	1.11326	3.15889
Ccrd_015710	CASP-like protein [Uniprot/SPTREMBL Acc. A0A118K3H2]	1.41467	0.00438014	0.0117919	1.841	5.33481
Ccrd_017282	Glyco_transf_28 domain-containing protein [Uniprot/SPTREMBL Acc. A0A103Y8C0]	1.41383	7.41795e-06	3.76524e-05	0.851839	2.43161
Ccrd_013225	GATA-type domain-containing protein [Uniprot/SPTREMBL Acc. A0A118K520]	1.41376	1.14984e-07	8.06265e-07	3.08433	8.85296
Ccrd_019982		1.41291	2.95225e-06	1.60646e-05	1.60159	4.60671
Ccrd_000476	GB1/RHD3-type G domain-containing protein [Uniprot/SPTREMBL Acc. A0A103XV48]	1.41279	1.30653e-11	1.54161e-10	3.26764	9.30269
Ccrd_006367		1.41182	2.61495e-05	0.000119439	0.38825	1.1039
Ccrd_004687	Fe2OG dioxygenase domain-containing protein [Uniprot/SPTREMBL Acc. A0A124SCB4]	1.41161	4.2929e-16	8.02129e-15	46.5038	131.108
Ccrd_011942		1.41096	4.38217e-07	2.77495e-06	0.953605	2.7483
Ccrd_000089	Nucleotide-binding, alpha-beta plait [Uniprot/SPTREMBL Acc. A0A103XVU3]	1.41057	1.69251e-16	3.28959e-15	3.60433	10.225
Ccrd_007061	Protein kinase domain-containing protein [Uniprot/SPTREMBL Acc. A0A118JU34]	1.4105	7.69652e-10	7.39776e-09	10.0509	28.3959
Ccrd_019806	GH10 domain-containing protein [Uniprot/SPTREMBL Acc. A0A118K0V1]	1.40969	0.0156542	0.0355282	0.12393	0.362867
Ccrd_015936		1.40853	2.96508e-07	1.93005e-06	4.65046	13.0539
Ccrd_003359	AP2/ERF domain-containing protein [Uniprot/SPTREMBL Acc. A0A124SCQ8]	1.40811	1.61605e-12	2.10723e-11	2.65733	7.54718
Ccrd_019485	Glycoside hydrolase, catalytic domain-containing protein [Uniprot/SPTREMBL Acc. A0A103Y453]	1.40779	3.24475e-13	4.5144e-12	9.39835	26.2876
Ccrd_013386	Protein kinase domain-containing protein [Uniprot/SPTREMBL Acc. A0A103YFR3]	1.40767	0.00732001	0.018399	0.965889	2.69751
Ccrd_008015	Zinc finger, FYVE/PHD-type [Uniprot/SPTREMBL Acc. A0A103XFY0]	1.40684	0.000470034	0.00163695	0.511207	1.46527
Ccrd_004708		1.40592	0.00048233	0.00167465	0.839027	2.42323
Ccrd_010264	Hexosyltransferase [Uniprot/SPTREMBL Acc. A0A124SI25]	1.40521	2.51699e-09	2.26085e-08	3.84297	10.7673
Ccrd_014596	AP2/ERF domain-containing protein [Uniprot/SPTREMBL Acc. A0A103YDE7]	1.40461	3.43372e-13	4.76019e-12	5.91292	16.6734
Ccrd_000113	HDAC_interact domain-containing protein [Uniprot/SPTREMBL Acc. A0A103XVQ0]	1.40314	1.37702e-08	1.11098e-07	1.3972	3.97837
Ccrd_006944	C2 domain-containing protein [Uniprot/SPTREMBL Acc. A0A118JU66]	1.40053	2.31601e-09	2.09198e-08	1.65068	4.63663
Ccrd_012216	Ubiquinol oxidase [Uniprot/SPTREMBL Acc. A0A103YHV8]	1.40034	2.48045e-11	2.82672e-10	5.96796	16.8004
Ccrd_013093	Chlorophyll A-B binding protein [Uniprot/SPTREMBL Acc. A0A103YG75]	1.39914	4.47014e-08	3.35591e-07	7.35354	20.4184
Ccrd_016066	Hexosyltransferase [Uniprot/SPTREMBL Acc. A0A118K3A1]	1.39873	6.58346e-05	0.000277078	18.1144	52.3664
Ccrd_015019	Cytochrome P450 [Uniprot/SPTREMBL Acc. A0A103YCM3]	1.39835	2.22971e-09	2.01969e-08	73.846	204.737
Ccrd_004650	Diacylglycerol O-acyltransferase [Uniprot/SPTREMBL Acc. A0A103XMA3]	1.39768	0.00253554	0.00727627	0.213144	0.601568
Ccrd_020695		1.39732	0.000468411	0.00163277	1.07554	3.06822
Ccrd_013550	Pentatricopeptide repeat-containing protein [Uniprot/SPTREMBL Acc. A0A103YFD1]	1.39642	5.52361e-07	3.42349e-06	0.42998	1.21285
Ccrd_025512	Protein kinase domain-containing protein [Uniprot/SPTREMBL Acc. A0A103WV88]	1.39523	0.00334608	0.00928804	0.937833	2.66329
Ccrd_014385	Peptidase A1 domain-containing protein [Uniprot/SPTREMBL Acc. A0A118K4B8]	1.39489	0.00310186	0.00869375	0.305548	0.874067
Ccrd_006642	HTH myb-type domain-containing protein [Uniprot/SPTREMBL Acc. A0A103XIE3]	1.39458	0.00214123	0.00628078	1.60615	4.43178
Ccrd_018841	Adenosinetriphosphatase [Uniprot/SPTREMBL Acc. A0A118K1I1]	1.39365	8.23463e-12	9.90358e-11	2.86972	8.05048
Ccrd_014527		1.39245	7.21123e-16	1.32188e-14	12.2849	34.4723
Ccrd_011657	Uncharacterized protein [Uniprot/SPTREMBL Acc. A0A103YJ30]	1.39226	7.17582e-15	1.19221e-13	4.3825	12.3519
Ccrd_025985		1.39196	0.0013294	0.00412074	0.491497	1.39776
Ccrd_026469	Histone H4 [Uniprot/SPTREMBL Acc. A0A103Y619]	1.39174	0.0151665	0.0345401	1.40307	4.08239
Ccrd_006204	BHLH domain-containing protein [Uniprot/SPTREMBL Acc. A0A118JUZ9]	1.39117	0.000317647	0.00115274	0.886841	2.51418
Ccrd_024563		1.38958	0.0154828	0.035193	0.398731	1.12566
Ccrd_006314		1.38955	6.55095e-09	5.57119e-08	3.35165	9.43286
Ccrd_000505		1.38945	1.50553e-15	2.68841e-14	11.3344	31.7984
Ccrd_000625	Cytochrome b5 heme-binding domain-containing protein [Uniprot/SPTREMBL Acc. A0A103XUU8]	1.38825	1.87661e-07	1.26496e-06	44.2861	122.856
Ccrd_012291	Lzipper-MIP1 domain-containing protein [Uniprot/SPTREMBL Acc. A0A103YHR3]	1.38745	0.000103734	0.000418727	1.51355	4.26414
Ccrd_013011	Nudix hydrolase domain-containing protein [Uniprot/SPTREMBL Acc. A0A103YGD6]	1.3873	2.06273e-09	1.87635e-08	7.58235	20.8496
Ccrd_007306		1.38713	5.39332e-09	4.66047e-08	3.11894	8.75293
Ccrd_015701	Uncharacterized protein [Uniprot/SPTREMBL Acc. A0A103YBB9]	1.38702	2.52163e-08	1.96083e-07	2160.26	6010.57
Ccrd_001754	S-acyltransferase [Uniprot/SPTREMBL Acc. A0A103XSN3]	1.38541	4.32529e-07	2.74162e-06	5.75295	16.0987
Ccrd_013751	Mitogen-activated protein kinase [Uniprot/SPTREMBL Acc. A0A103YF15]	1.38073	0.000817113	0.00267385	0.798042	2.19258
Ccrd_019578	Zinc finger, B-box [Uniprot/SPTREMBL Acc. A0A103Y421]	1.37999	2.39617e-11	2.73713e-10	13.1165	36.2655
Ccrd_003260		1.37953	0.0199509	0.0436954	0.729042	2.05737
Ccrd_007905	C2 calcium-dependent membrane targeting [Uniprot/SPTREMBL Acc. A0A103XG45]	1.37944	1.47497e-10	1.55447e-09	3.66256	10.2118
Ccrd_025345		1.37933	3.25414e-14	5.03858e-13	8.06073	22.3848
Ccrd_019390	Serine O-acetyltransferase [Uniprot/SPTREMBL Acc. A0A118K150]	1.37925	4.85326e-07	3.04139e-06	24.2461	66.0457
Ccrd_008029	BHLH domain-containing protein [Uniprot/SPTREMBL Acc. A0A103XFU6]	1.37744	0.00155749	0.00475154	0.561802	1.57366
Ccrd_000626		1.3774	2.05134e-13	2.92774e-12	7.37986	20.467
Ccrd_024681	Uncharacterized protein [Uniprot/SPTREMBL Acc. A0A118JSC2]	1.37707	3.99245e-12	5.00714e-11	5.11071	14.1969
Ccrd_006306		1.37644	8.13511e-10	7.78929e-09	0.795474	2.20455
Ccrd_012925	Band 4.1 domain-containing protein [Uniprot/SPTREMBL Acc. A0A103YGI8]	1.37641	3.36884e-13	4.6736e-12	5.81255	16.2663
Ccrd_017734		1.3763	6.29264e-15	1.05271e-13	5.17791	14.4079
Ccrd_008060		1.37556	1.84403e-06	1.04305e-05	1.01875	2.80686
Ccrd_018840	Mitogen-activated protein kinase [Uniprot/SPTREMBL Acc. A0A103Y5I6]	1.37509	3.0267e-14	4.70148e-13	16.6617	46.4081
Ccrd_024219	WRKY domain-containing protein [Uniprot/SPTREMBL Acc. A0A103XDX7]	1.37466	5.55675e-10	5.43561e-09	3.05687	8.4803
Ccrd_012946		1.37304	0.00318744	0.00890168	0.176667	0.499566
Ccrd_014935	Apple-like protein [Uniprot/SPTREMBL Acc. A0A103YCS4]	1.37181	5.43681e-05	0.000232925	1.29474	3.6012
Ccrd_006740	Homeobox domain-containing protein [Uniprot/SPTREMBL Acc. A0A103XI70]	1.37082	0.0169426	0.038002	0.225785	0.648366
Ccrd_011321	Protein kinase domain-containing protein [Uniprot/SPTREMBL Acc. A0A118K685]	1.37036	4.22149e-14	6.39306e-13	34.9184	95.7375
Ccrd_018443	Non-specific serine/threonine protein kinase [Uniprot/SPTREMBL Acc. A0A103Y667]	1.3688	2.45695e-07	1.62334e-06	6.59846	18.1236
Ccrd_005971		1.36849	4.55187e-13	6.20795e-12	5.42668	14.9783
Ccrd_024696	Uncharacterized protein [Uniprot/SPTREMBL Acc. A0A124SAY5]	1.36753	9.25218e-08	6.59278e-07	11.6011	31.9931
Ccrd_015914		1.3664	1.38453e-11	1.62571e-10	22.5813	62.1465
Ccrd_002462	HSF_DOMAIN domain-containing protein [Uniprot/SPTREMBL Acc. A0A118JWX6]	1.36631	9.33528e-06	4.65057e-05	2.08666	5.73581
Ccrd_022404	Sucrose-phosphate synthase [Uniprot/SPTREMBL Acc. A0A103XYQ5]	1.36505	4.46179e-09	3.9026e-08	1.49282	4.1055
Ccrd_000072	Protein kinase domain-containing protein [Uniprot/SPTREMBL Acc. A0A103XVT8]	1.36449	2.92251e-07	1.90426e-06	1.05363	2.90366
Ccrd_020957	CCHC-type domain-containing protein [Uniprot/SPTREMBL Acc. A0A124SEP6]	1.36328	2.59118e-07	1.70503e-06	1.20834	3.28067
Ccrd_018586		1.36307	8.24869e-06	4.15096e-05	53.4114	147.16
Ccrd_015398	AAA domain-containing protein [Uniprot/SPTREMBL Acc. A0A103YBY7]	1.36184	6.68576e-05	0.000280956	0.624616	1.70997
Ccrd_019421	Uncharacterized protein [Uniprot/SPTREMBL Acc. A0A124SF70]	1.36022	4.96241e-15	8.39616e-14	18.0815	49.835
Ccrd_000121	J domain-containing protein [Uniprot/SPTREMBL Acc. A0A124SDR3]	1.35983	1.80634e-10	1.88317e-09	4.54373	12.3863
Ccrd_008168	KIX_2 domain-containing protein [Uniprot/SPTREMBL Acc. A0A103XFJ9]	1.3588	4.90662e-11	5.44401e-10	2.6062	7.08346
Ccrd_017401	Aminotran_1_2 domain-containing protein [Uniprot/SPTREMBL Acc. A0A124SFU8]	1.35877	3.70336e-06	1.98666e-05	5.37792	14.3906
Ccrd_017452	Flavin monooxygenase FMO [Uniprot/SPTREMBL Acc. A0A103Y821]	1.35839	0.00493337	0.0130625	0.626928	1.70369
Ccrd_002262		1.35768	0.000548938	0.00187859	2.35213	6.53606
Ccrd_000689		1.3575	0.00313826	0.00878432	1.58442	4.42108
Ccrd_016811	Elf4 domain-containing protein [Uniprot/SPTREMBL Acc. A0A118K2T4]	1.35741	5.62237e-09	4.83463e-08	49.6089	136.624
Ccrd_020247		1.35705	6.99946e-05	0.000292992	6.11485	16.4541
Ccrd_015102		1.35529	9.52694e-17	1.8994e-15	14.9475	40.788
Ccrd_008604	FY-rich, C-terminal [Uniprot/SPTREMBL Acc. A0A124SB37]	1.35528	1.69557e-07	1.14893e-06	0.83748	2.26296
Ccrd_016880		1.35393	2.05093e-12	2.64773e-11	7.16542	19.6765
Ccrd_015424	Concanavalin A-like lectin/glucanase, subgroup [Uniprot/SPTREMBL Acc. A0A103YBW8]	1.35268	5.9374e-17	1.20994e-15	3.87361	10.5545
Ccrd_005968		1.34995	3.96291e-08	2.99839e-07	4.66439	12.5324
Ccrd_013325	TF-B3 domain-containing protein [Uniprot/SPTREMBL Acc. A0A103YFT2]	1.34941	0.016586	0.037293	0.423421	1.14791
Ccrd_013668		1.34917	2.78439e-09	2.49293e-08	11.1555	30.0245
Ccrd_013727		1.34855	1.0957e-06	6.43869e-06	0.614961	1.6743
Ccrd_000716		1.34775	6.38343e-15	1.06698e-13	96.0117	261.92
Ccrd_000044		1.34731	2.11717e-09	1.92406e-08	40.15	109.273
Ccrd_013247	Cytochrome P450 [Uniprot/SPTREMBL Acc. A0A103YFY1]	1.34674	0.0150125	0.0342165	0.221446	0.614789
Ccrd_018761	H15 domain-containing protein [Uniprot/SPTREMBL Acc. A0A124SFE0]	1.34427	5.68847e-07	3.51468e-06	74.3208	198.047
Ccrd_006023	Non-specific serine/threonine protein kinase [Uniprot/SPTREMBL Acc. A0A103XJL7]	1.34417	4.66798e-07	2.93383e-06	3.7043	10.1283
Ccrd_007036	Kinesin motor domain-containing protein [Uniprot/SPTREMBL Acc. A0A103XHQ3]	1.34335	4.67396e-06	2.46697e-05	1.13025	3.05297
Ccrd_003624		1.34274	9.68864e-15	1.58787e-13	23.3886	63.7632
Ccrd_025770	RING-type E3 ubiquitin transferase [Uniprot/SPTREMBL Acc. A0A103XDQ1]	1.34267	1.40502e-06	8.10741e-06	8.36101	22.1782
Ccrd_019521		1.34215	3.63017e-11	4.06477e-10	20.0622	55.0174
Ccrd_008056	DNA-directed DNA polymerase, family A, palm domain-containing protein [Uniprot/SPTREMBL Acc. A0A103XFZ6]	1.34212	2.94622e-06	1.60408e-05	0.328982	0.893917
Ccrd_024284		1.34161	1.39319e-07	9.59167e-07	1.54056	4.18069
Ccrd_003901	Auxin responsive SAUR protein [Uniprot/SPTREMBL Acc. A0A118JVN7]	1.34144	0.00373686	0.0102448	5.4861	15.4549
Ccrd_021387	UDP-glucuronosyl/UDP-glucosyltransferase [Uniprot/SPTREMBL Acc. A0A118JZT5]	1.34127	0.000168822	0.000652709	1.42527	3.80868
Ccrd_005353	CCT domain-containing protein [Uniprot/SPTREMBL Acc. A0A118JUT3]	1.34116	9.37287e-11	1.00925e-09	8.33338	22.8597
Ccrd_012734	Metallophos domain-containing protein [Uniprot/SPTREMBL Acc. A0A118K5C7]	1.34062	2.17168e-13	3.08583e-12	27.1761	73.1496
Ccrd_016491	AAA domain-containing protein [Uniprot/SPTREMBL Acc. A0A103Y9T8]	1.34049	1.1657e-06	6.8272e-06	1.66491	4.46778
Ccrd_007333	NAC domain-containing protein [Uniprot/SPTREMBL Acc. A0A124SBI1]	1.34037	2.55998e-13	3.60842e-12	14.4595	38.8253
Ccrd_000685	Protein DETOXIFICATION [Uniprot/SPTREMBL Acc. A0A103XUN3]	1.33958	5.67157e-05	0.000242071	0.285867	0.764014
Ccrd_012852		1.33932	0.0228388	0.0490476	2.30962	6.66954
Ccrd_006304		1.33838	0.000376303	0.00134516	3.72433	10.1657
Ccrd_004144	CTLH, C-terminal LisH motif-containing protein [Uniprot/SPTREMBL Acc. A0A103XN39]	1.33818	1.3356e-11	1.57111e-10	14.1596	38.0851
Ccrd_022764		1.33631	1.31427e-07	9.11648e-07	30.1979	80.2957
Ccrd_006782	Epimerase domain-containing protein [Uniprot/SPTREMBL Acc. A0A103XI74]	1.33561	9.74246e-11	1.04556e-09	29.6456	79.2241
Ccrd_006374	DYW_deaminase domain-containing protein [Uniprot/SPTREMBL Acc. A0A118JTV2]	1.33556	0.00772879	0.0192984	0.560052	1.49568
Ccrd_024281		1.33461	5.0914e-14	7.66245e-13	5.70879	15.3219
Ccrd_009539	Fatty acid desaturase, type 1 [Uniprot/SPTREMBL Acc. A0A118K7B9]	1.33437	0.0039663	0.0107852	0.775532	2.0601
Ccrd_006172		1.33422	4.15431e-15	7.09093e-14	18.111	48.4826
Ccrd_014795		1.33351	2.12342e-05	9.90706e-05	169.479	453.019
Ccrd_013777		1.3335	6.33838e-06	3.25659e-05	1.52958	4.08597
Ccrd_017212		1.33329	0.000603988	0.0020467	0.484017	1.2927
Ccrd_006945	Beta-amylase [Uniprot/SPTREMBL Acc. A0A103XHU8]	1.33281	2.03433e-11	2.34178e-10	9.6416	25.7621
Ccrd_001228	RRM domain-containing protein [Uniprot/SPTREMBL Acc. A0A124SDE4]	1.33166	2.33285e-05	0.000107699	1.24756	3.37594
Ccrd_007501	NAC domain-containing protein [Uniprot/SPTREMBL Acc. A0A118JTU5]	1.33149	0.00914291	0.0223099	0.393031	1.07167
Ccrd_015206	Putative DEAD/DEAH-box helicase [Uniprot/SPTREMBL Acc. A0A118K3T3]	1.32893	1.64086e-06	9.3745e-06	0.720901	1.95894
Ccrd_019598	Glutathione S-transferase/chloride channel, C-terminal [Uniprot/SPTREMBL Acc. A0A103Y411]	1.32872	2.27323e-11	2.60422e-10	476.636	1265.86
Ccrd_025950	Gamma-glutamyl kinase [Uniprot/SPTREMBL Acc. A0A103TAU2]	1.32814	1.47282e-08	1.18235e-07	3.42232	9.09533
Ccrd_006931	Protein kinase domain-containing protein [Uniprot/SPTREMBL Acc. A0A103XHX9]	1.32751	1.59365e-16	3.10681e-15	4.70427	12.5732
Ccrd_016882	AT-hook motif nuclear-localized protein [Uniprot/SPTREMBL Acc. A0A103Y970]	1.32467	1.6041e-10	1.68505e-09	3.86815	10.3111
Ccrd_016981	DNA_MISMATCH_REPAIR_2 domain-containing protein [Uniprot/SPTREMBL Acc. A0A103Y8Y0]	1.32404	8.1165e-10	7.77824e-09	1.6566	4.39962
Ccrd_006890	WD_REPEATS_REGION domain-containing protein [Uniprot/SPTREMBL Acc. A0A103XI73]	1.32399	0.0037117	0.0101845	0.237542	0.63577
Ccrd_007517	ABC transporter domain-containing protein [Uniprot/SPTREMBL Acc. A0A103XGR3]	1.32293	6.03443e-05	0.000255977	0.469222	1.2599
Ccrd_008387	Peroxidase [Uniprot/SPTREMBL Acc. A0A103XF49]	1.32185	1.01048e-07	7.15548e-07	83.2201	218.047
Ccrd_006607		1.3216	1.34751e-09	1.25648e-08	1.78666	4.73802
Ccrd_024988		1.32008	1.82603e-05	8.61096e-05	1.08909	2.89218
Ccrd_019090	Proline dehydrogenase [Uniprot/SPTREMBL Acc. A0A103Y4Y7]	1.31992	2.02253e-07	1.35623e-06	21.366	55.6298
Ccrd_023767		1.31979	3.62044e-06	1.94488e-05	3.39851	9.158
Ccrd_002830	Fatty acid desaturase, type 1 [Uniprot/SPTREMBL Acc. A0A103XQN4]	1.31953	0.00205492	0.00605333	2.886	7.48257
Ccrd_000137		1.31813	8.02508e-12	9.66959e-11	15.7354	41.3847
Ccrd_007560	FA_desaturase domain-containing protein [Uniprot/SPTREMBL Acc. A0A103XGT6]	1.31762	0.000173951	0.00067026	8.66028	22.9544
Ccrd_021467	Protein kinase domain-containing protein [Uniprot/SPTREMBL Acc. A0A118JZR1]	1.31756	0.00247867	0.00713744	0.785248	2.06391
Ccrd_023339	BZIP domain-containing protein [Uniprot/SPTREMBL Acc. A0A103XWY9]	1.31703	1.73249e-11	2.01349e-10	111.748	295.979
Ccrd_002131		1.31592	2.90673e-07	1.89526e-06	29.9408	78.4613
Ccrd_007947	HMA domain-containing protein [Uniprot/SPTREMBL Acc. A0A103XG28]	1.31555	2.28965e-07	1.51954e-06	16.5414	44.1611
Ccrd_012180		1.31555	0.00507492	0.0133948	0.2864	0.755236
Ccrd_008629	Prenyltransferase/squalene oxidase [Uniprot/SPTREMBL Acc. A0A103XEQ4]	1.31462	3.64187e-12	4.57933e-11	11.1858	29.5417
Ccrd_011905		1.31454	1.444e-08	1.16066e-07	1.3485	3.59181
Ccrd_024685	WD_REPEATS_REGION domain-containing protein [Uniprot/SPTREMBL Acc. A0A103XE08]	1.31335	4.35907e-10	4.3253e-09	26.6893	72.2502
Ccrd_000238	O-fucosyltransferase family protein [Uniprot/SPTREMBL Acc. A0A103XVI5]	1.31317	1.85857e-10	1.93241e-09	3.81362	10.0417
Ccrd_016713		1.31301	1.56831e-07	1.06892e-06	2.12456	5.65186
Ccrd_006006	Zinc finger, RING/FYVE/PHD-type [Uniprot/SPTREMBL Acc. A0A124SBW9]	1.31297	0.0197114	0.0432652	0.393015	1.05729
Ccrd_020183	ADP-glucose pyrophosphorylase, conserved site-containing protein [Uniprot/SPTREMBL Acc. A0A103Y2X1]	1.31238	2.59463e-11	2.95162e-10	4.02772	10.7608
Ccrd_014475	Uncharacterized protein [Uniprot/SPTREMBL Acc. A0A103YDM3]	1.31129	0.00564725	0.0147067	0.136474	0.365851
Ccrd_012780		1.31117	9.00493e-07	5.38653e-06	1.69515	4.51005
Ccrd_018612		1.31042	0.0016385	0.00496182	0.690322	1.84416
Ccrd_006073	Pyruvate kinase [Uniprot/SPTREMBL Acc. A0A118JV30]	1.31006	1.91865e-07	1.2924e-06	1.59519	4.27113
Ccrd_023421		1.30921	6.33529e-05	0.000267799	17.0615	44.0091
Ccrd_023146	Myb-like domain-containing protein [Uniprot/SPTREMBL Acc. A0A103XXB5]	1.30887	4.62618e-10	4.57157e-09	4.93203	13.1096
Ccrd_006697	Abhydrolase_3 domain-containing protein [Uniprot/SPTREMBL Acc. A0A118JTP1]	1.30856	4.18263e-07	2.65816e-06	7.22103	19.2016
Ccrd_010678		1.30762	1.4863e-06	8.53684e-06	430.426	1133.83
Ccrd_024057	Zinc finger, B-box [Uniprot/SPTREMBL Acc. A0A103DT19]	1.30749	0.0005661	0.00193083	0.894706	2.3433
Ccrd_003337		1.30698	3.28008e-11	3.68799e-10	9.11641	24.0987
Ccrd_006096	Actin-binding FH2 [Uniprot/SPTREMBL Acc. A0A103XJE9]	1.30587	0.0070235	0.0177854	0.619438	1.65447
Ccrd_013733		1.30556	4.33259e-13	5.934e-12	17.8173	47.5883
Ccrd_004359	Glucose/ribitol dehydrogenase [Uniprot/SPTREMBL Acc. A0A103XMQ0]	1.30551	7.75413e-09	6.51421e-08	8.14368	21.5298
Ccrd_024807	Uncharacterized protein [Uniprot/SPTREMBL Acc. A0A124SAL3]	1.3054	1.57935e-05	7.55266e-05	1.86138	4.94009
Ccrd_021550	RING-CH-type domain-containing protein [Uniprot/SPTREMBL Acc. A0A103Y0E1]	1.30536	1.05824e-10	1.13256e-09	9.79415	25.5958
Ccrd_013161		1.3043	3.57882e-07	2.29936e-06	1.52319	4.00788
Ccrd_000756	Uncharacterized protein [Uniprot/SPTREMBL Acc. A0A103XUG3]	1.30301	5.99204e-10	5.83191e-09	245.908	656.116
Ccrd_009568	Uncharacterized protein [Uniprot/SPTREMBL Acc. A0A103YMX8]	1.30297	3.12828e-09	2.78279e-08	13.711	36.2697
Ccrd_002177	CCHC-type domain-containing protein [Uniprot/SPTREMBL Acc. A0A103XRU3]	1.30291	8.82218e-07	5.28211e-06	4.8465	12.7091
Ccrd_000612	BZIP domain-containing protein [Uniprot/SPTREMBL Acc. A0A103XUV9]	1.30188	3.00783e-05	0.000135717	1.27982	3.35286
Ccrd_022607	Microtubule-associated protein, MAP65/Ase1/PRC1 [Uniprot/SPTREMBL Acc. A0A124SE71]	1.30105	3.9123e-16	7.35992e-15	9.1111	23.9803
Ccrd_009126		1.30067	0.0126308	0.0295514	2.71303	7.20545
Ccrd_014301		1.29919	0.000902461	0.00291949	1.04445	2.74042
Ccrd_021771		1.29801	0.000422503	0.00148776	2.17301	5.64059
Ccrd_024967		1.29764	0.00155084	0.0047343	0.86388	2.27307
Ccrd_005478	Protein kinase domain-containing protein [Uniprot/SPTREMBL Acc. A0A118JVG4]	1.2975	2.97159e-08	2.28409e-07	1.88779	4.86572
Ccrd_021607		1.29736	0.00395312	0.0107569	0.317394	0.828766
Ccrd_022818		1.29701	0.0108071	0.0258502	1.60127	4.11845
Ccrd_026288	Uncharacterized protein [Uniprot/SPTREMBL Acc. A0A103R8M0]	1.29633	1.73959e-08	1.38046e-07	27.5658	73.0036
Ccrd_022034	Uncharacterized protein [Uniprot/SPTREMBL Acc. A0A103XZE9]	1.29583	4.87002e-10	4.79538e-09	219.583	583.354
Ccrd_006228	Glutamine-Leucine-Glutamine, QLQ [Uniprot/SPTREMBL Acc. A0A103XJ58]	1.29211	0.000518864	0.00178897	0.67231	1.78348
Ccrd_018003		1.29207	6.3141e-14	9.42922e-13	46.4401	120.669
Ccrd_013717		1.29179	2.76448e-05	0.000125675	2.39192	6.22034
Ccrd_015160	Uncharacterized protein [Uniprot/SPTREMBL Acc. A0A103YCC7]	1.29141	0.0127947	0.0298621	0.286682	0.765644
Ccrd_018440	Protein kinase domain-containing protein [Uniprot/SPTREMBL Acc. A0A103Y672]	1.29106	3.37518e-07	2.17648e-06	9.74439	25.0147
Ccrd_002326	Nucleotide-diphospho-sugar transferase [Uniprot/SPTREMBL Acc. A0A103XRJ8]	1.2905	3.09515e-13	4.31869e-12	8.16222	21.2651
Ccrd_016931	Nucleoporin protein Ndc1-Nup [Uniprot/SPTREMBL Acc. A0A103Y927]	1.2901	1.89385e-14	2.99715e-13	12.3627	32.2703
Ccrd_000713	Uncharacterized protein [Uniprot/SPTREMBL Acc. A0A103XUM8]	1.28952	6.96271e-12	8.45804e-11	370.576	978.898
Ccrd_020718		1.28924	3.3334e-14	5.14071e-13	11.6229	30.2782
Ccrd_013463	Long-chain-alcohol oxidase [Uniprot/SPTREMBL Acc. A0A103YFJ5]	1.28922	8.96362e-11	9.66801e-10	17.9431	46.624
Ccrd_012145	Polyribonucleotide nucleotidyltransferase [Uniprot/SPTREMBL Acc. A0A103YI10]	1.28848	0.00529033	0.0138989	1.7144	4.53428
Ccrd_007067	Uncharacterized protein [Uniprot/SPTREMBL Acc. A0A103XHJ7]	1.28787	6.21096e-09	5.30538e-08	0.726207	1.8868
Ccrd_021459		1.28785	1.08508e-06	6.38017e-06	2.94213	7.63863
Ccrd_004352		1.28745	1.09831e-07	7.73217e-07	9.45619	24.8209
Ccrd_020928		1.28638	6.57027e-09	5.58516e-08	16.1203	42.4122
Ccrd_023393	Cytochrome P450 [Uniprot/SPTREMBL Acc. A0A103XWX5]	1.28598	0.00193266	0.00573863	1.28099	3.33056
Ccrd_014602	Pentatricopeptide repeat-containing protein [Uniprot/SPTREMBL Acc. A0A103YDE2]	1.28522	0.00917345	0.0223686	0.255161	0.660714
Ccrd_026518	ATP phosphoribosyltransferase [Uniprot/SPTREMBL Acc. A0A103XDA9]	1.28503	6.44984e-12	7.86466e-11	7.31481	19.0903
Ccrd_017045	Pectinesterase [Uniprot/SPTREMBL Acc. A0A118K2M4]	1.28481	2.05855e-13	2.93155e-12	6.19467	16.1498
Ccrd_024919	Histone acetyltransferase [Uniprot/SPTREMBL Acc. A0A103XBR2]	1.28431	1.76112e-08	1.39526e-07	0.483866	1.25843
Ccrd_015899		1.28416	4.28012e-14	6.47678e-13	11.9801	31.0685
Ccrd_004921		1.28361	1.65969e-07	1.1262e-06	64.4225	169.021
Ccrd_007210	Root cap [Uniprot/SPTREMBL Acc. A0A118JUB4]	1.28329	8.69145e-06	4.35225e-05	1.11698	2.88316
Ccrd_006725		1.2824	0.0178434	0.0397505	0.303626	0.794999
Ccrd_019344	AAA domain-containing protein [Uniprot/SPTREMBL Acc. A0A118K173]	1.28226	0.00139685	0.00430564	0.221675	0.586458
Ccrd_016796	Peptidase M50 [Uniprot/SPTREMBL Acc. A0A103Y9B5]	1.28119	6.80922e-07	4.16456e-06	1.29408	3.38371
Ccrd_002192	Cytochrome P450 [Uniprot/SPTREMBL Acc. A0A118JWP1]	1.28111	2.89421e-07	1.88836e-06	44.2272	113.989
Ccrd_008081	Uncharacterized protein [Uniprot/SPTREMBL Acc. A0A118JTJ7]	1.28046	5.68296e-13	7.69627e-12	7.42064	19.1355
Ccrd_024609		1.28046	9.35371e-05	0.000381306	0.993095	2.59767
Ccrd_024588	Arf GTPase activating protein [Uniprot/SPTREMBL Acc. A0A103XC62]	1.28024	5.39473e-06	2.81893e-05	1.38393	3.58126
Ccrd_002090	RNA helicase [Uniprot/SPTREMBL Acc. A0A103XS81]	1.27891	6.26316e-13	8.46424e-12	3.37591	8.73646
Ccrd_024580		1.27876	1.06867e-10	1.14246e-09	11.7838	30.3887
Ccrd_023100		1.27813	1.74879e-08	1.38606e-07	22.03	57.0105
Ccrd_023132	EGF-like calcium-binding [Uniprot/SPTREMBL Acc. A0A103XXB8]	1.27811	7.15018e-07	4.35523e-06	2.63068	6.83556
Ccrd_019760	Calcium-binding EF-hand [Uniprot/SPTREMBL Acc. A0A103Y3U7]	1.2767	0.000209682	0.00079324	187.114	483.243
Ccrd_020379	Glyco_transf_20 domain-containing protein [Uniprot/SPTREMBL Acc. A0A103Y2J1]	1.27609	8.54617e-05	0.000351498	9.93354	25.1728
Ccrd_006942	Dil domain-containing protein [Uniprot/SPTREMBL Acc. A0A103XI40]	1.27569	0.00154105	0.00470985	0.195356	0.501607
Ccrd_007499		1.2749	5.61438e-09	4.82991e-08	5.34657	13.6316
Ccrd_001654		1.27393	2.37668e-05	0.000109539	0.53325	1.38212
Ccrd_015921		1.27368	1.41699e-14	2.27224e-13	17.017	43.7426
Ccrd_024504		1.27295	8.63144e-07	5.17271e-06	6.76243	17.4068
Ccrd_019205	Uncharacterized protein [Uniprot/SPTREMBL Acc. A0A103Y4U9]	1.27204	0.0136794	0.0316216	0.701655	1.8575
Ccrd_018644	AP2/ERF domain-containing protein [Uniprot/SPTREMBL Acc. A0A118K1L7]	1.27201	0.000697815	0.00232774	1.4118	3.68035
Ccrd_016527	BUB1 N-terminal domain-containing protein [Uniprot/SPTREMBL Acc. A0A118K317]	1.2716	0.000438965	0.00154068	1.08452	2.81294
Ccrd_025415	RNA-processing protein, HAT helix [Uniprot/SPTREMBL Acc. A0A103XAB6]	1.27063	9.5237e-07	5.66879e-06	1.08217	2.78224
Ccrd_015975	Uncharacterized protein [Uniprot/SPTREMBL Acc. A0A124SG94]	1.27014	1.86011e-08	1.46827e-07	3.04285	7.89763
Ccrd_012584		1.27007	0.00171611	0.00516462	0.481607	1.22865
Ccrd_016043		1.26944	0.00282197	0.00799152	5.30834	13.5662
Ccrd_016898	Serine/threonine-protein phosphatase [Uniprot/SPTREMBL Acc. A0A103Y935]	1.26818	1.09904e-15	1.97899e-14	65.443	169.251
Ccrd_009326	Inositol oxygenase [Uniprot/SPTREMBL Acc. A0A103YNF3]	1.26804	1.01719e-06	6.02677e-06	2.38404	6.06343
Ccrd_014699	Hydrolase_4 domain-containing protein [Uniprot/SPTREMBL Acc. A0A103YD86]	1.26724	6.73444e-09	5.70966e-08	6.28953	15.9705
Ccrd_006020		1.26667	3.12067e-08	2.39202e-07	2.50219	6.42436
Ccrd_016857		1.26507	4.89903e-09	4.26191e-08	218.074	569.098
Ccrd_021476		1.26429	0.00129983	0.00404138	1.15181	2.92108
Ccrd_016015	DYW_deaminase domain-containing protein [Uniprot/SPTREMBL Acc. A0A124SG91]	1.26399	0.00915759	0.0223384	0.3082	0.800974
Ccrd_016707		1.26397	1.28184e-11	1.51687e-10	18.4103	47.0808
Ccrd_000161	Receptor-like serine/threonine-protein kinase [Uniprot/SPTREMBL Acc. A0A103XVN5]	1.26382	3.78933e-07	2.42334e-06	7.19351	18.633
Ccrd_020975		1.26376	0.00167018	0.00504366	0.524795	1.33858
Ccrd_007538		1.26299	0.000482492	0.00167491	10.073	25.7584
Ccrd_004192	Fe2OG dioxygenase domain-containing protein [Uniprot/SPTREMBL Acc. A0A103XN60]	1.26102	1.0148e-07	7.18344e-07	13.6427	34.6754
Ccrd_013631	Pyr_redox_2 domain-containing protein [Uniprot/SPTREMBL Acc. A0A103YF81]	1.26076	5.08432e-12	6.2828e-11	10.2603	26.2119
Ccrd_017973	Uncharacterized protein [Uniprot/SPTREMBL Acc. A0A103Y745]	1.25964	1.63488e-07	1.11131e-06	8.70173	22.4356
Ccrd_006074	Fe2OG dioxygenase domain-containing protein [Uniprot/SPTREMBL Acc. A0A118JU53]	1.25897	0.00977063	0.02364	0.770485	1.97475
Ccrd_006436	ATP-dependent DNA helicase [Uniprot/SPTREMBL Acc. A0A118JTZ1]	1.2586	4.44069e-07	2.80466e-06	0.739726	1.89767
Ccrd_007388		1.25755	2.60221e-05	0.000118998	0.699654	1.79369
Ccrd_007246	UTP--glucose-1-phosphate uridylyltransferase [Uniprot/SPTREMBL Acc. A0A103XHE9]	1.25706	1.38693e-05	6.70212e-05	0.669505	1.70717
Ccrd_009207	HTH myb-type domain-containing protein [Uniprot/SPTREMBL Acc. A0A118K7K3]	1.25602	1.79701e-08	1.42253e-07	6.37965	16.1727
Ccrd_014243		1.25574	3.62484e-08	2.76314e-07	65.9064	167.201
Ccrd_000676		1.25547	2.3144e-06	1.28667e-05	4.74758	12.2564
Ccrd_007549	Cnd1 domain-containing protein [Uniprot/SPTREMBL Acc. A0A103XGS4]	1.25469	3.0123e-05	0.000135855	1.75198	4.35146
Ccrd_025223		1.25441	0.00299349	0.00841807	0.359682	0.917823
Ccrd_016612	Uncharacterized protein [Uniprot/SPTREMBL Acc. A0A103Y9L2]	1.25417	0.00190909	0.00567474	0.353569	0.898719
Ccrd_020277		1.25389	2.20641e-05	0.000102547	4.59636	11.7727
Ccrd_000525	Ion transport 2 [Uniprot/SPTREMBL Acc. A0A103XUZ9]	1.25384	0.000100503	0.000406872	1.48305	3.75162
Ccrd_025591	Concanavalin A-like lectin/glucanase, subgroup [Uniprot/SPTREMBL Acc. A0A103WGS2]	1.25113	1.45769e-13	2.11005e-12	10.6569	27.3046
Ccrd_012591	Calcium uniporter protein [Uniprot/SPTREMBL Acc. A0A103YH71]	1.25046	5.51465e-09	4.75258e-08	36.8306	92.34
Ccrd_017252	Peptidase A1 domain-containing protein [Uniprot/SPTREMBL Acc. A0A103Y8G9]	1.25019	0.000174362	0.000671575	7.6368	19.7589
Ccrd_021169	DYW_deaminase domain-containing protein [Uniprot/SPTREMBL Acc. A0A103Y132]	1.25016	0.00720009	0.0181518	0.226148	0.584423
Ccrd_016780	WD_REPEATS_REGION domain-containing protein [Uniprot/SPTREMBL Acc. A0A103Y9A7]	1.24813	7.18985e-07	4.37798e-06	7.48923	19.1828
Ccrd_000131	Protein kinase domain-containing protein [Uniprot/SPTREMBL Acc. A0A118JYA2]	1.2479	8.0283e-13	1.07669e-11	9.67892	24.5338
Ccrd_023195	DEP domain-containing protein [Uniprot/SPTREMBL Acc. A0A103XXB6]	1.2478	2.06401e-05	9.64387e-05	0.906383	2.28878
Ccrd_000148	Protein FAR1-RELATED SEQUENCE [Uniprot/SPTREMBL Acc. A0A118JXU5]	1.24689	7.95006e-12	9.60419e-11	6.38364	16.1548
Ccrd_017838		1.24653	8.17738e-06	4.11936e-05	2.7786	7.05525
Ccrd_000315	AP2/ERF domain-containing protein [Uniprot/SPTREMBL Acc. A0A118JY74]	1.24547	9.03902e-12	1.08373e-10	14.5172	37.1724
Ccrd_007076		1.24532	0.000496435	0.00171807	3.95686	10.0668
Ccrd_000702	Protein kinase domain-containing protein [Uniprot/SPTREMBL Acc. A0A103XUM6]	1.24511	0.000225224	0.000846242	2.66705	6.69336
Ccrd_023184	GFO_IDH_MocA domain-containing protein [Uniprot/SPTREMBL Acc. A0A118JYG6]	1.2435	1.2829e-11	1.51687e-10	72.2355	183.037
Ccrd_020827	Beta-Casp domain-containing protein [Uniprot/SPTREMBL Acc. A0A118K091]	1.2434	3.30579e-11	3.71258e-10	3.19943	8.08585
Ccrd_004436	Dynamin [Uniprot/SPTREMBL Acc. A0A118JV57]	1.24129	0.00472294	0.0125791	0.479291	1.23276
Ccrd_000733	Ran GTPase [Uniprot/SPTREMBL Acc. A0A103XUL6]	1.24055	5.33508e-10	5.2267e-09	92.4355	235.979
Ccrd_012795	Uncharacterized protein [Uniprot/SPTREMBL Acc. A0A124SH97]	1.24039	5.93176e-11	6.50677e-10	139.675	348.014
Ccrd_015090		1.23992	0.0004079	0.00144133	1.10197	2.81223
Ccrd_018011	Glutaredoxin domain-containing protein [Uniprot/SPTREMBL Acc. A0A103Y714]	1.23959	0.00111908	0.00353915	0.993239	2.54206
Ccrd_021705	ABC transporter domain-containing protein [Uniprot/SPTREMBL Acc. A0A118K066]	1.23729	2.93458e-08	2.25833e-07	3.04793	7.62184
Ccrd_007041		1.2372	2.70028e-06	1.48228e-05	166.446	420.818
Ccrd_007883	Mitochondrial carrier domain-containing protein [Uniprot/SPTREMBL Acc. A0A124SBA5]	1.23687	0.0035421	0.00976404	0.646281	1.60241
Ccrd_006333	Histidine kinase domain-containing protein [Uniprot/SPTREMBL Acc. A0A103XJ33]	1.23637	1.29195e-05	6.27132e-05	1.30688	3.31571
Ccrd_003217		1.23531	1.8391e-12	2.38062e-11	7.9497	20.0977
Ccrd_016803	Uncharacterized protein [Uniprot/SPTREMBL Acc. A0A103Y993]	1.23436	1.62583e-07	1.10555e-06	4.45339	11.063
Ccrd_002154		1.23392	0.000541845	0.00185596	0.585163	1.45736
Ccrd_016895		1.23364	1.80843e-10	1.88433e-09	4.71111	11.8628
Ccrd_016687	SAP domain-containing protein [Uniprot/SPTREMBL Acc. A0A103Y9G6]	1.23299	7.42972e-05	0.000308863	1.97621	4.99303
Ccrd_015860	Helicase Sen1, N-terminal [Uniprot/SPTREMBL Acc. A0A103YB10]	1.23235	2.27248e-09	2.05458e-08	1.08604	2.72271
Ccrd_024656	DOG1 domain-containing protein [Uniprot/SPTREMBL Acc. A0A103XC30]	1.23204	7.15024e-07	4.35523e-06	20.3943	52.2669
Ccrd_021600	BHLH domain-containing protein [Uniprot/SPTREMBL Acc. A0A103Y092]	1.23194	1.85689e-06	1.0497e-05	3.44079	8.63044
Ccrd_002971		1.2316	2.91995e-07	1.90324e-06	2.8836	7.22988
Ccrd_015641	Asp/Glu/hydantoin racemase [Uniprot/SPTREMBL Acc. A0A118K3J1]	1.23087	0.0167418	0.0375995	0.492853	1.25833
Ccrd_021565	Uncharacterized protein [Uniprot/SPTREMBL Acc. A0A103Y0B3]	1.22895	0.000277201	0.00102071	0.700383	1.75691
Ccrd_018946	Peptidase_M3 domain-containing protein [Uniprot/SPTREMBL Acc. A0A103Y579]	1.22772	2.61783e-07	1.72022e-06	6.39269	15.8504
Ccrd_005643	Aldehyde dehydrogenase [Uniprot/SPTREMBL Acc. A0A103XKJ1]	1.22691	1.40338e-14	2.25415e-13	26.4596	65.9839
Ccrd_006738	AP2/ERF domain-containing protein [Uniprot/SPTREMBL Acc. A0A124SBP2]	1.22624	0.0016658	0.00503357	1.90992	4.85634
Ccrd_019124	Uncharacterized protein [Uniprot/SPTREMBL Acc. A0A103Y4Y0]	1.22556	6.07434e-06	3.12924e-05	80.8505	198.851
Ccrd_000728		1.22514	4.24386e-12	5.30524e-11	170.997	425.544
Ccrd_019700	Kinesin-like protein [Uniprot/SPTREMBL Acc. A0A118K0Z2]	1.22492	3.59013e-09	3.17319e-08	6.66102	16.6607
Ccrd_006767		1.22481	4.42128e-07	2.79788e-06	8.31078	20.7806
Ccrd_001598	Uncharacterized protein [Uniprot/SPTREMBL Acc. A0A103XSY7]	1.2244	0.000450373	0.00157586	0.565668	1.42669
Ccrd_017615	Armadillo-like helical [Uniprot/SPTREMBL Acc. A0A103Y7T7]	1.22399	2.9923e-10	3.0489e-09	6.73431	16.8717
Ccrd_026443	Calcium-binding EF-hand [Uniprot/SPTREMBL Acc. A0A118HC37]	1.2235	3.18809e-08	2.4408e-07	11.6683	28.6022
Ccrd_004465	2OG-FeII_Oxy_2 domain-containing protein [Uniprot/SPTREMBL Acc. A0A103XMK0]	1.22288	6.59002e-09	5.59949e-08	4.16749	10.3555
Ccrd_024680	Plant specific eukaryotic initiation factor 4B [Uniprot/SPTREMBL Acc. A0A103XE07]	1.22286	1.21947e-07	8.52304e-07	2.16306	5.3802
Ccrd_022496	PKS_ER domain-containing protein [Uniprot/SPTREMBL Acc. A0A103XYH6]	1.22276	7.17373e-10	6.92971e-09	272.846	685.617
Ccrd_018697		1.22161	9.76781e-05	0.000396848	0.556097	1.38394
Ccrd_004546	Chloramphenicol acetyltransferase-like domain-containing protein [Uniprot/SPTREMBL Acc. A0A103XMG7]	1.22141	1.05403e-09	9.97257e-09	5.19331	12.903
Ccrd_012279	TPT domain-containing protein [Uniprot/SPTREMBL Acc. A0A124SHF3]	1.22104	1.06145e-06	6.25456e-06	1.76055	4.4114
Ccrd_024692		1.22085	1.33481e-10	1.41292e-09	21.7204	54.0729
Ccrd_015749	Anoctamin/TMEM 16 [Uniprot/SPTREMBL Acc. A0A103YB93]	1.22029	0.000554313	0.0018943	0.728506	1.80958
Ccrd_013348		1.21846	1.10214e-07	7.7535e-07	24.7908	62.2643
Ccrd_007474		1.21797	0.00456502	0.0122242	0.335391	0.827369
Ccrd_001658		1.21785	5.40892e-06	2.82482e-05	232.414	580.212
Ccrd_011058	Uncharacterized protein [Uniprot/SPTREMBL Acc. A0A124SHT6]	1.21757	9.55897e-15	1.57061e-13	19.2696	47.679
Ccrd_012862	RING-type domain-containing protein [Uniprot/SPTREMBL Acc. A0A103YGL9]	1.21736	1.854e-07	1.25103e-06	10.7984	26.3724
Ccrd_010757	DNA polymerase kappa [Uniprot/SPTREMBL Acc. A0A103YKS3]	1.21695	1.00683e-05	4.97601e-05	2.75386	6.95436
Ccrd_015592		1.21689	8.32819e-05	0.000343116	1.47894	3.67736
Ccrd_020995		1.21686	0.0048745	0.0129293	3.08431	7.56408
Ccrd_001778	Homeobox domain-containing protein [Uniprot/SPTREMBL Acc. A0A124SD84]	1.21684	5.42342e-07	3.36597e-06	2.85539	7.08761
Ccrd_015906	Pyridoxal phosphate-dependent transferase, major region, subdomain 1 [Uniprot/SPTREMBL Acc. A0A103YAU7]	1.21649	0.000378542	0.00135241	6.98658	17.1198
Ccrd_026235	Transcription initiation factor TFIID subunit 2 [Uniprot/SPTREMBL Acc. A0A103XDA4]	1.21565	0.000355692	0.00127739	1.60622	3.93342
Ccrd_004041	Glucose/ribitol dehydrogenase [Uniprot/SPTREMBL Acc. A0A124SCJ0]	1.21507	2.50302e-06	1.38263e-05	2.49564	6.13477
Ccrd_000482		1.21507	0.00157158	0.00478776	0.916569	2.25043
Ccrd_024170	Arginine decarboxylase [Uniprot/SPTREMBL Acc. A0A124P3P8]	1.21386	1.04786e-06	6.18011e-06	161.601	402.073
Ccrd_004817	Polyprenyl synthetase [Uniprot/SPTREMBL Acc. A0A103XLX3]	1.21313	5.50986e-10	5.3952e-09	5.09079	12.6954
Ccrd_000537	Uncharacterized protein [Uniprot/SPTREMBL Acc. A0A103XV02]	1.21244	1.11453e-09	1.05038e-08	2.79779	6.87658
Ccrd_015688	Uncharacterized protein [Uniprot/SPTREMBL Acc. A0A118K3H9]	1.21244	3.59974e-09	3.18023e-08	6.87921	16.9032
Ccrd_011705	Aquaporin-like protein [Uniprot/SPTREMBL Acc. A0A103YIY0]	1.21231	0.019016	0.0419615	0.444824	1.1246
Ccrd_005362	Uncharacterized protein [Uniprot/SPTREMBL Acc. A0A103XKU3]	1.21063	1.19692e-08	9.78744e-08	7.32858	18.2314
Ccrd_007398		1.20953	1.8675e-06	1.055e-05	1.12276	2.76555
Ccrd_006449	Cytochrome P450 [Uniprot/SPTREMBL Acc. A0A103XIU6]	1.20944	8.39114e-05	0.000345636	3.06805	7.67767
Ccrd_009017	Homeobox domain-containing protein [Uniprot/SPTREMBL Acc. A0A103XE09]	1.20889	1.57099e-05	7.51456e-05	28.7608	70.1549
Ccrd_012384	Uncharacterized protein [Uniprot/SPTREMBL Acc. A0A103YHM7]	1.20738	0.00026194	0.000970062	6.50831	16.0405
Ccrd_011579		1.20646	0.0101583	0.0244861	0.661915	1.65344
Ccrd_019375		1.20605	0.0146515	0.033524	0.965341	2.36533
Ccrd_000119		1.20586	0.0125866	0.029458	0.375791	0.931629
Ccrd_023440	TF-B3 domain-containing protein [Uniprot/SPTREMBL Acc. A0A103XWT5]	1.2056	6.96227e-08	5.05418e-07	21.6506	53.374
Ccrd_020442		1.20559	2.6043e-06	1.43244e-05	103.252	250.464
Ccrd_013020	Ankyrin repeat-containing protein [Uniprot/SPTREMBL Acc. A0A103YGC2]	1.20545	1.55592e-11	1.81374e-10	4.14952	10.2385
Ccrd_006536	Endo/exonuclease/phosphatase domain-containing protein [Uniprot/SPTREMBL Acc. A0A103XIJ2]	1.20535	6.00432e-09	5.14022e-08	9.48244	23.5072
Ccrd_024768	Concanavalin A-like lectin/glucanase, subgroup [Uniprot/SPTREMBL Acc. A0A103XBY5]	1.20515	2.07559e-08	1.62575e-07	15.9125	39.5863
Ccrd_021797		1.20482	2.7268e-07	1.78455e-06	7.55916	18.2319
Ccrd_020334	Xyloglucan:xyloglucosyl transferase [Uniprot/SPTREMBL Acc. A0A124SEW7]	1.20416	1.78909e-05	8.45535e-05	52.8835	128.609
Ccrd_017987		1.20401	5.68846e-06	2.95644e-05	7.29159	17.6652
Ccrd_011967	ENDO3c domain-containing protein [Uniprot/SPTREMBL Acc. A0A103YIA8]	1.20255	2.06272e-08	1.61698e-07	1.73731	4.2831
Ccrd_008390	Multi antimicrobial extrusion protein [Uniprot/SPTREMBL Acc. A0A124SB58]	1.20235	7.08755e-07	4.32249e-06	38.332	92.3244
Ccrd_020616		1.20227	0.00527024	0.0138585	1.5761	3.96897
Ccrd_008035	PHD domain-containing protein [Uniprot/SPTREMBL Acc. A0A118JT98]	1.20203	1.48279e-09	1.37533e-08	1.57435	3.88294
Ccrd_016810	Peptidyl-prolyl cis-trans isomerase [Uniprot/SPTREMBL Acc. A0A118K2T0]	1.20141	1.08297e-11	1.29202e-10	12.4088	30.5304
Ccrd_013791	Uncharacterized protein [Uniprot/SPTREMBL Acc. A0A118K4P8]	1.20076	9.41843e-13	1.25789e-11	13.1202	32.295
Ccrd_014640	Chloramphenicol acetyltransferase-like domain-containing protein [Uniprot/SPTREMBL Acc. A0A103YDB6]	1.20028	9.78798e-06	4.85732e-05	3.60894	8.92066
Ccrd_015952		1.20004	2.10269e-08	1.64565e-07	1.55845	3.87182
Ccrd_019513	Phytocyanin domain-containing protein [Uniprot/SPTREMBL Acc. A0A103Y487]	1.19943	2.15229e-05	0.000100273	3.01858	7.45745
Ccrd_000736		1.19792	1.4883e-10	1.56596e-09	11.0323	27.1671
Ccrd_004761	Kinesin-like protein [Uniprot/SPTREMBL Acc. A0A118JVE6]	1.19725	1.74953e-05	8.28506e-05	1.73663	4.27484
Ccrd_017184	AGC-kinase C-terminal domain-containing protein [Uniprot/SPTREMBL Acc. A0A103Y8J6]	1.19615	3.152e-07	2.04141e-06	4.24421	10.3307
Ccrd_023991	AB hydrolase-1 domain-containing protein [Uniprot/SPTREMBL Acc. A0A103EN48]	1.19468	4.06744e-06	2.16994e-05	8.50808	20.9793
Ccrd_002518	Tubulin beta chain [Uniprot/SPTREMBL Acc. A0A103XR54]	1.19403	6.4234e-05	0.00027105	46.1381	115.584
Ccrd_014075		1.19386	3.85184e-06	2.0606e-05	1.06515	2.58743
Ccrd_025658		1.19366	0.00318755	0.00890168	1.29962	3.16326
Ccrd_006326	Uncharacterized protein [Uniprot/SPTREMBL Acc. A0A124SBT6]	1.19315	2.46262e-11	2.80806e-10	20.4283	49.5913
Ccrd_000177	Purple acid phosphatase [Uniprot/SPTREMBL Acc. A0A118JY94]	1.19264	1.47623e-07	1.01273e-06	13.9919	33.5927
Ccrd_025944	Glyco_18 domain-containing protein [Uniprot/SPTREMBL Acc. A0A103XDI5]	1.19223	8.61342e-07	5.16672e-06	11.1557	26.9218
Ccrd_002924		1.19193	5.00086e-05	0.00021573	0.851638	2.08315
Ccrd_023213	STAS domain-containing protein [Uniprot/SPTREMBL Acc. A0A103XX87]	1.19172	2.95533e-06	1.60768e-05	2.01703	4.94426
Ccrd_024407	Nucleotide-binding, alpha-beta plait [Uniprot/SPTREMBL Acc. A0A124SAP9]	1.19164	1.28321e-11	1.51687e-10	8.68637	21.0149
Ccrd_016118	Immunoglobulin E-set [Uniprot/SPTREMBL Acc. A0A103YAI0]	1.19157	3.47542e-14	5.34269e-13	22.9465	56.014
Ccrd_005033		1.19118	3.40462e-08	2.60245e-07	19.8016	47.774
Ccrd_007368	Bromo adjacent homology (BAH) domain-containing protein [Uniprot/SPTREMBL Acc. A0A118JTP0]	1.19072	3.6745e-05	0.000162537	1.78758	4.38441
Ccrd_016930	Nucleoporin protein Ndc1-Nup [Uniprot/SPTREMBL Acc. A0A103Y921]	1.18967	1.32529e-10	1.4036e-09	12.1809	29.6305
Ccrd_015932	Protein kinase domain-containing protein [Uniprot/SPTREMBL Acc. A0A118K3C6]	1.18955	6.83677e-10	6.62406e-09	12.6067	30.315
Ccrd_004614		1.18932	0.000409305	0.00144444	275.22	679.347
Ccrd_008288	BHLH domain-containing protein [Uniprot/SPTREMBL Acc. A0A103XFI2]	1.18913	2.06246e-06	1.15712e-05	9.16957	22.1392
Ccrd_016765	AP-3 complex subunit beta [Uniprot/SPTREMBL Acc. A0A118K2U0]	1.1879	2.86524e-06	1.56484e-05	4.8851	11.8931
Ccrd_022413		1.18656	2.85466e-07	1.86445e-06	3.45101	8.41191
Ccrd_011286	Rab3 GTPase-activating protein catalytic subunit [Uniprot/SPTREMBL Acc. A0A118K6A3]	1.18643	3.81593e-10	3.82959e-09	5.603	13.6392
Ccrd_010843	RING-type domain-containing protein [Uniprot/SPTREMBL Acc. A0A118K6J0]	1.18633	5.12229e-05	0.000220574	2.16851	5.26696
Ccrd_016896	AT-hook motif nuclear-localized protein [Uniprot/SPTREMBL Acc. A0A103Y951]	1.18627	1.90736e-13	2.73232e-12	69.6942	170.755
Ccrd_000007	Amino acid permease domain-containing protein [Uniprot/SPTREMBL Acc. A0A118JYJ8]	1.18556	0.0143148	0.0328508	0.201905	0.493432
Ccrd_001517	Uncharacterized protein [Uniprot/SPTREMBL Acc. A0A103XT48]	1.18505	1.01322e-09	9.60993e-09	28.6932	69.7053
Ccrd_011442	Protein kinase domain-containing protein [Uniprot/SPTREMBL Acc. A0A103YJE9]	1.18489	1.80093e-12	2.33277e-11	6.03199	14.618
Ccrd_012638	Armadillo-type fold [Uniprot/SPTREMBL Acc. A0A103YH24]	1.18477	0.00630244	0.0161863	0.202022	0.488626
Ccrd_012644		1.18468	0.0107138	0.0256461	0.59053	1.4308
Ccrd_025231	Concanavalin A-like lectin/glucanase, subgroup [Uniprot/SPTREMBL Acc. A0A103XB75]	1.18411	0.0220069	0.0475894	0.162177	0.397163
Ccrd_023407	Uncharacterized protein family UPF0114 [Uniprot/SPTREMBL Acc. A0A103XWV4]	1.18361	1.21419e-05	5.92513e-05	3.81755	9.24824
Ccrd_013835	Kinesin motor domain-containing protein [Uniprot/SPTREMBL Acc. A0A103YEU9]	1.18269	0.000290345	0.00106405	1.06289	2.56715
Ccrd_011348	RING-type domain-containing protein [Uniprot/SPTREMBL Acc. A0A103YJE2]	1.18248	1.55553e-06	8.91067e-06	6.58694	15.8961
Ccrd_012137		1.18245	1.36404e-05	6.60306e-05	17.474	43.3553
Ccrd_003437	Fe2OG dioxygenase domain-containing protein [Uniprot/SPTREMBL Acc. A0A103XPL9]	1.18199	2.98815e-06	1.62371e-05	33.7097	81.9213
Ccrd_023358		1.18196	0.00352196	0.00971492	1.89354	4.66429
Ccrd_016064		1.1818	3.11425e-07	2.02034e-06	3.05217	7.42797
Ccrd_007464		1.18155	0.00560817	0.0146187	0.51769	1.23724
Ccrd_023153	Organic solute transporter Ost-alpha [Uniprot/SPTREMBL Acc. A0A103XXH1]	1.18048	1.1906e-06	6.95619e-06	3.84791	9.17479
Ccrd_001085		1.17961	1.18426e-05	5.78198e-05	5.01569	11.9649
Ccrd_009946	Early nodulin 93 ENOD93 protein [Uniprot/SPTREMBL Acc. A0A118K751]	1.1795	0.0208866	0.0454974	17.0886	40.1739
Ccrd_000468	Cysteine dioxygenase [Uniprot/SPTREMBL Acc. A0A103XV04]	1.17741	8.77092e-09	7.31124e-08	9.30575	22.5835
Ccrd_001633		1.17703	0.00384647	0.0105063	2.22879	5.51783
Ccrd_014878		1.1767	0.0108885	0.026019	1.84344	4.4947
Ccrd_011065	Uncharacterized protein [Uniprot/SPTREMBL Acc. A0A103YJY9]	1.17653	3.50292e-08	2.67336e-07	1.42959	3.43954
Ccrd_005072	SAC domain-containing protein [Uniprot/SPTREMBL Acc. A0A103XLE3]	1.17645	4.84696e-11	5.38399e-10	6.66252	16.0423
Ccrd_007335		1.17632	9.12283e-08	6.51501e-07	18.2398	43.6387
Ccrd_013365		1.17623	7.2627e-05	0.000302571	1.15953	2.81852
Ccrd_004124		1.17564	4.83791e-06	2.54586e-05	3.54405	8.4771
Ccrd_005945	Lecithin:cholesterol/phospholipid:diacylglycerol acyltransferase [Uniprot/SPTREMBL Acc. A0A124SBX7]	1.17563	2.95191e-10	3.01092e-09	56.4617	135.111
Ccrd_025095	Zinc finger, B-box [Uniprot/SPTREMBL Acc. A0A103XBE6]	1.17527	6.88956e-11	7.51055e-10	9.90392	23.8386
Ccrd_012800	Uncharacterized protein [Uniprot/SPTREMBL Acc. A0A103YGT8]	1.17442	1.00783e-05	4.97966e-05	1.90219	4.62283
Ccrd_010721	Oligopeptide transporter OPT superfamily [Uniprot/SPTREMBL Acc. A0A124SHW9]	1.1743	7.42546e-10	7.15144e-09	4.61057	11.0933
Ccrd_000941	Receptor-like serine/threonine-protein kinase [Uniprot/SPTREMBL Acc. A0A103XU62]	1.17355	0.00017795	0.000684987	2.26474	5.31809
Ccrd_016026	PKS_ER domain-containing protein [Uniprot/SPTREMBL Acc. A0A103YAQ7]	1.17352	1.96761e-12	2.54186e-11	36.8486	88.9139
Ccrd_023056	Pentatricopeptide repeat-containing protein [Uniprot/SPTREMBL Acc. A0A103XXP7]	1.17339	3.64315e-06	1.95599e-05	1.17363	2.84933
Ccrd_016075		1.17318	0.00945643	0.0229699	0.681248	1.64438
Ccrd_015795		1.17286	4.51966e-10	4.47775e-09	26.7809	63.8687
Ccrd_025858		1.17218	0.000908221	0.00293616	0.335114	0.810637
Ccrd_000552	Carboxypeptidase [Uniprot/SPTREMBL Acc. A0A103XUV3]	1.17049	0.000389645	0.00138568	0.869852	2.07639
Ccrd_002371	Endoglucanase [Uniprot/SPTREMBL Acc. A0A103XRJ0]	1.16994	0.00046988	0.00163671	1.07934	2.64256
Ccrd_010569		1.16927	0.000244369	0.000912326	7.45606	17.519
Ccrd_013714		1.16893	0.00387753	0.0105735	0.632759	1.50899
Ccrd_007220	Uncharacterized protein [Uniprot/SPTREMBL Acc. A0A124SBI5]	1.16875	0.000111944	0.000449053	12.6216	30.6322
Ccrd_026237		1.1682	5.51559e-06	2.87742e-05	18.017	43.2671
Ccrd_026646		1.1672	0.00227792	0.00663545	1.40128	3.39977
Ccrd_006539	Uncharacterized protein [Uniprot/SPTREMBL Acc. A0A118JU48]	1.16676	4.70087e-08	3.51955e-07	1.96458	4.72271
Ccrd_019168		1.16666	1.32205e-05	6.41103e-05	8.62639	20.6602
Ccrd_000458	Bromodomain-containing protein [Uniprot/SPTREMBL Acc. A0A118JY93]	1.16601	1.4565e-08	1.16974e-07	1.72874	4.12999
Ccrd_000132	UAA transporter [Uniprot/SPTREMBL Acc. A0A103XVN4]	1.16561	2.71524e-08	2.09705e-07	3.76472	9.00675
Ccrd_006579	Calcium-binding EF-hand [Uniprot/SPTREMBL Acc. A0A103XIN5]	1.16546	2.48431e-05	0.000114119	1.4612	3.50356
Ccrd_022941	Rhamnogalacturonan endolyase [Uniprot/SPTREMBL Acc. A0A118JYY3]	1.16531	0.0174063	0.0388886	0.56623	1.35224
Ccrd_020484	RING-type E3 ubiquitin transferase [Uniprot/SPTREMBL Acc. A0A118K0C5]	1.16488	0.0140624	0.0323533	0.359183	0.849674
Ccrd_026450		1.16427	2.60271e-07	1.71204e-06	7.79445	18.3965
Ccrd_000188	AAA domain-containing protein [Uniprot/SPTREMBL Acc. A0A103XVL9]	1.16352	1.52254e-09	1.41017e-08	3.96167	9.50472
Ccrd_019869	Concanavalin A-like lectin/glucanase superfamily [Uniprot/SPTREMBL Acc. A0A103Y3K0]	1.16346	4.9015e-05	0.000211821	0.302646	0.718462
Ccrd_018473		1.16329	1.69265e-08	1.34598e-07	7.77537	18.7238
Ccrd_014338		1.16308	0.00193788	0.00575148	0.596112	1.45265
Ccrd_005094	Protein kinase domain-containing protein [Uniprot/SPTREMBL Acc. A0A103XL79]	1.16261	0.0158991	0.0359954	0.248535	0.59523
Ccrd_021762	Kinesin motor domain-containing protein [Uniprot/SPTREMBL Acc. A0A124SEG6]	1.16255	0.00195722	0.00579821	1.14558	2.75007
Ccrd_012911	DNA mismatch repair, conserved site-containing protein [Uniprot/SPTREMBL Acc. A0A103YGK7]	1.16241	3.14544e-07	2.03784e-06	2.08904	4.99323
Ccrd_008321	DDT domain-containing protein [Uniprot/SPTREMBL Acc. A0A103XF88]	1.16132	2.5813e-09	2.31646e-08	1.10299	2.63386
Ccrd_003983	Protein kinase domain-containing protein [Uniprot/SPTREMBL Acc. A0A118JVL9]	1.16104	4.82886e-12	5.98624e-11	10.3361	24.8975
Ccrd_013809		1.16069	1.08904e-05	5.34676e-05	1.75447	4.19629
Ccrd_012522	Cytochrome P450 [Uniprot/SPTREMBL Acc. A0A124SHC6]	1.16049	1.04067e-05	5.12621e-05	0.931517	2.21257
Ccrd_022395	Uncharacterized protein [Uniprot/SPTREMBL Acc. A0A103XYS3]	1.15908	0.000273652	0.00100955	2.83856	6.81131
Ccrd_023445		1.15742	0.00158554	0.00482422	0.433872	1.04448
Ccrd_000426	RRM domain-containing protein [Uniprot/SPTREMBL Acc. A0A103XV27]	1.15638	3.65699e-12	4.59536e-11	16.1872	38.4903
Ccrd_011438	HATPase_c domain-containing protein [Uniprot/SPTREMBL Acc. A0A124SHP2]	1.15611	1.75845e-11	2.03999e-10	217.379	515.4
Ccrd_000644	HTH myb-type domain-containing protein [Uniprot/SPTREMBL Acc. A0A103XUQ9]	1.15554	1.45256e-11	1.70043e-10	5.23131	12.4568
Ccrd_024670		1.15478	1.93457e-07	1.30041e-06	5.05849	12.1182
Ccrd_004586	SCP domain-containing protein [Uniprot/SPTREMBL Acc. A0A103XM95]	1.15452	0.00533237	0.013994	760.283	1843.5
Ccrd_006461		1.15447	0.00400542	0.0108778	0.742237	1.73133
Ccrd_012718		1.15089	0.000146985	0.000575997	5.81203	13.869
Ccrd_000712	Ribosomal protein L3 [Uniprot/SPTREMBL Acc. A0A103XUN1]	1.14992	2.27094e-07	1.50868e-06	84.891	205.637
Ccrd_011460	Leucine-rich repeat-containing protein [Uniprot/SPTREMBL Acc. A0A118K662]	1.14916	0.00415563	0.0112533	1.38428	3.29379
Ccrd_006299	G-patch domain-containing protein [Uniprot/SPTREMBL Acc. A0A103XJ65]	1.14839	5.49674e-08	4.06662e-07	2.86486	6.79351
Ccrd_011723	SHSP domain-containing protein [Uniprot/SPTREMBL Acc. A0A103YIQ4]	1.1481	3.59566e-07	2.30865e-06	102.667	239.967
Ccrd_000631	3-methyl-2-oxobutanoate hydroxymethyltransferase [Uniprot/SPTREMBL Acc. A0A118JY05]	1.1475	1.24395e-07	8.6691e-07	3.48167	8.26732
Ccrd_024565	Peptidase A1 domain-containing protein [Uniprot/SPTREMBL Acc. A0A103XC96]	1.14735	0.00233644	0.00679056	43.9621	108.179
Ccrd_019294		1.14703	8.68935e-07	5.2058e-06	2.86575	6.70332
Ccrd_023033	Aldedh domain-containing protein [Uniprot/SPTREMBL Acc. A0A118JZG9]	1.14638	8.42288e-10	8.04793e-09	45.0327	106.362
Ccrd_000528	Alpha-1,6-mannosyl-glycoprotein 6-beta-N-acetylglucosaminyltransferase [Uniprot/SPTREMBL Acc. A0A103XV30]	1.14602	3.20884e-08	2.45473e-07	3.7413	8.91903
Ccrd_021772	HECT domain-containing protein [Uniprot/SPTREMBL Acc. A0A103Y007]	1.14591	4.04664e-11	4.51315e-10	9.71148	22.887
Ccrd_004635	Glycosyltransferase [Uniprot/SPTREMBL Acc. A0A103XMB5]	1.14521	0.00114794	0.00362214	2.81154	6.63421
Ccrd_015490	Glucose/ribitol dehydrogenase [Uniprot/SPTREMBL Acc. A0A118K3L8]	1.14505	0.000725149	0.00240502	0.916521	2.16635
Ccrd_008399	Cytochrome P450 [Uniprot/SPTREMBL Acc. A0A103XF95]	1.14487	1.39765e-07	9.61552e-07	1.20142	2.83005
Ccrd_018884	Protein kinase domain-containing protein [Uniprot/SPTREMBL Acc. A0A103Y5D2]	1.14409	1.22514e-11	1.45534e-10	10.5105	24.6855
Ccrd_004904		1.14346	3.26431e-05	0.000146165	1.09916	2.58811
Ccrd_024695	Zinc finger, RING/FYVE/PHD-type [Uniprot/SPTREMBL Acc. A0A124SAY3]	1.14331	1.79149e-05	8.46462e-05	3.08776	7.15669
Ccrd_013928		1.14281	0.00301459	0.00847003	1.73281	4.11827
Ccrd_001860		1.1425	0.000226908	0.000852238	2.37525	5.66064
Ccrd_006572	RING-type domain-containing protein [Uniprot/SPTREMBL Acc. A0A118JU99]	1.14166	0.000180937	0.000695378	0.974559	2.30891
Ccrd_000240	CYTH-like domain-containing protein [Uniprot/SPTREMBL Acc. A0A118JYD7]	1.14092	3.42656e-05	0.000152617	1.83113	4.28899
Ccrd_016824	Protein kinase domain-containing protein [Uniprot/SPTREMBL Acc. A0A103Y997]	1.14055	6.66157e-05	0.000280122	3.34129	7.89258
Ccrd_021768		1.1394	0.00351854	0.00970686	2.13293	4.99618
Ccrd_004973		1.13914	1.68063e-05	8.00139e-05	85.3617	201.338
Ccrd_003325		1.13909	7.62896e-05	0.000316262	0.711163	1.69527
Ccrd_012875		1.13899	0.000693498	0.00231623	11.4672	26.1501
Ccrd_002544		1.13886	0.016489	0.0371006	8.10415	18.432
Ccrd_016782	LIM zinc-binding domain-containing protein [Uniprot/SPTREMBL Acc. A0A124SG04]	1.13863	0.00424286	0.0114583	0.691049	1.6101
Ccrd_006008	Exostosin domain-containing protein [Uniprot/SPTREMBL Acc. A0A103XJS1]	1.13834	2.15992e-07	1.44037e-06	2.70747	6.31652
Ccrd_016846	Polyketide cyclase/dehydrase [Uniprot/SPTREMBL Acc. A0A118K2S5]	1.13779	9.08524e-06	4.53535e-05	24.0815	57.9287
Ccrd_016710	CPSF_A domain-containing protein [Uniprot/SPTREMBL Acc. A0A103Y9F8]	1.13735	5.95953e-08	4.38552e-07	11.4614	27.033
Ccrd_001931	Arginine decarboxylase [Uniprot/SPTREMBL Acc. A0A103XSB3]	1.13659	3.18099e-05	0.000142632	250.001	590.168
Ccrd_024393	Protein kinase domain-containing protein [Uniprot/SPTREMBL Acc. A0A103XCJ2]	1.13635	9.78489e-07	5.81352e-06	4.9138	11.6498
Ccrd_012018	J domain-containing protein [Uniprot/SPTREMBL Acc. A0A103YI96]	1.13632	1.19356e-08	9.76407e-08	408.794	948.611
Ccrd_013485	Pectate lyase [Uniprot/SPTREMBL Acc. A0A118K4W0]	1.13593	0.00308356	0.00864675	9.13353	21.9606
Ccrd_014450	Phosphopyruvate hydratase [Uniprot/SPTREMBL Acc. A0A103YDP3]	1.13464	1.74272e-07	1.17841e-06	494.642	1142.04
Ccrd_013613	MutS_I domain-containing protein [Uniprot/SPTREMBL Acc. A0A103YF94]	1.13456	0.0046197	0.0123457	0.850914	2.00065
Ccrd_016270		1.13449	1.10057e-07	7.74522e-07	26.0821	60.4118
Ccrd_022725		1.13444	1.90644e-09	1.73827e-08	33.6811	78.2785
Ccrd_018203		1.1338	3.71688e-07	2.38174e-06	1.16468	2.71979
Ccrd_019553	ALOG domain-containing protein [Uniprot/SPTREMBL Acc. A0A103Y442]	1.1336	0.0139768	0.0321931	0.319965	0.761317
Ccrd_020436	DYW_deaminase domain-containing protein [Uniprot/SPTREMBL Acc. A0A118K0J4]	1.13348	0.00360028	0.00990498	0.720612	1.69262
Ccrd_026164	Protein kinase domain-containing protein [Uniprot/SPTREMBL Acc. A0A103SDX4]	1.13328	5.00152e-06	2.62695e-05	0.932113	2.19038
Ccrd_016814	Cytochrome P450 [Uniprot/SPTREMBL Acc. A0A118K2T2]	1.13248	0.000311903	0.00113445	1.04804	2.44013
Ccrd_006988	ANK_REP_REGION domain-containing protein [Uniprot/SPTREMBL Acc. A0A118JU06]	1.13141	9.4674e-07	5.63701e-06	6.80131	15.6606
Ccrd_004943	Uncharacterized protein [Uniprot/SPTREMBL Acc. A0A103XLR6]	1.13116	7.88515e-06	3.98773e-05	3.11369	7.34646
Ccrd_015472	Cytochrome P450 [Uniprot/SPTREMBL Acc. A0A103YBS5]	1.13047	8.25363e-05	0.000340388	1.95559	4.59298
Ccrd_008605	4-coumarate--CoA ligase [Uniprot/SPTREMBL Acc. A0A118JT05]	1.13025	0.00828056	0.0204492	0.698267	1.60431
Ccrd_024449		1.13015	0.012965	0.0301974	1.28052	2.98048
Ccrd_016609	Pyruvate kinase [Uniprot/SPTREMBL Acc. A0A118K2X3]	1.12999	5.582e-09	4.80633e-08	5.67814	13.2614
Ccrd_016912	Peptidase_M48 domain-containing protein [Uniprot/SPTREMBL Acc. A0A103Y946]	1.12968	6.03735e-11	6.61509e-10	10.806	25.1689
Ccrd_026219	Peptidase S10, serine carboxypeptidase [Uniprot/SPTREMBL Acc. A0A103RXA7]	1.12868	6.83252e-07	4.17617e-06	9.76575	22.4253
Ccrd_016042	Glyco_transf_20 domain-containing protein [Uniprot/SPTREMBL Acc. A0A103YAN5]	1.1278	1.74963e-05	8.28506e-05	18.8978	43.26
Ccrd_024848		1.1277	1.33682e-07	9.25627e-07	1.94033	4.49724
Ccrd_025622	Concanavalin A-like lectin/glucanase, subgroup [Uniprot/SPTREMBL Acc. A0A103W848]	1.12769	1.37614e-06	7.96564e-06	3.90707	9.11247
Ccrd_016889	NERD domain-containing protein [Uniprot/SPTREMBL Acc. A0A103Y942]	1.12717	3.64289e-08	2.77471e-07	14.3147	33.4719
Ccrd_015645	Phospholipase/carboxylesterase/thioesterase [Uniprot/SPTREMBL Acc. A0A103YBF9]	1.12679	4.72565e-07	2.96719e-06	31.6599	75.3719
Ccrd_004257	ATG11 domain-containing protein [Uniprot/SPTREMBL Acc. A0A103XN29]	1.12536	1.42868e-12	1.87317e-11	5.37935	12.5574
Ccrd_016165		1.12443	2.26102e-07	1.50261e-06	1.34411	3.12863
Ccrd_023825	AAA+ ATPase domain-containing protein [Uniprot/SPTREMBL Acc. A0A124SDT6]	1.12387	0.000650813	0.00218964	1.22898	2.91335
Ccrd_015617	DOG1 domain-containing protein [Uniprot/SPTREMBL Acc. A0A103YBH8]	1.12369	0.00154247	0.00471201	1.46537	3.4118
Ccrd_026487		1.12361	0.0105343	0.0252853	1.75934	4.11019
Ccrd_000633	WRKY domain-containing protein [Uniprot/SPTREMBL Acc. A0A118JYK9]	1.12313	2.53681e-05	0.000116337	3.98138	9.3992
Ccrd_000100	Glyco_transf_20 domain-containing protein [Uniprot/SPTREMBL Acc. A0A118JY00]	1.12277	3.21515e-06	1.73535e-05	7.95137	18.3549
Ccrd_004100	AAA+ ATPase domain-containing protein [Uniprot/SPTREMBL Acc. A0A103XN64]	1.12195	0.000325518	0.00117865	0.405971	0.940809
Ccrd_019377		1.12194	0.00447909	0.0120274	0.712477	1.70612
Ccrd_007369	Kinesin-like protein [Uniprot/SPTREMBL Acc. A0A118JU41]	1.12098	2.6399e-06	1.45161e-05	1.11103	2.59108
Ccrd_015119	Histone domain-containing protein [Uniprot/SPTREMBL Acc. A0A103YCF0]	1.12078	1.29187e-07	8.97074e-07	380.214	893.196
Ccrd_012947	Glycosyl transferase, family 1 [Uniprot/SPTREMBL Acc. A0A118K581]	1.12061	0.0153495	0.0349229	0.412197	0.975174
Ccrd_005381	Homeobox domain-containing protein [Uniprot/SPTREMBL Acc. A0A124SC33]	1.12044	8.20428e-06	4.13004e-05	2.09544	4.83052
Ccrd_007419		1.12012	1.9786e-07	1.32861e-06	4.65625	10.7382
Ccrd_002666	Endoglucanase [Uniprot/SPTREMBL Acc. A0A103XQV0]	1.11942	0.00120629	0.00378708	105.341	246.457
Ccrd_006349	BZIP domain-containing protein [Uniprot/SPTREMBL Acc. A0A103XJ10]	1.11878	2.81887e-09	2.52147e-08	5.52006	12.7199
[truncated: 2,545 more rows]

## Sheet: L1.DOWN
Gene ID	Gene description	logFC	P-value	FDR	Mean FPKM reference	Mean FPKM query
Ccrd_026126	Uncharacterized protein [Uniprot/SPTREMBL Acc. A0A103SPA7]	-10.5282	6.0346e-126	1.15069e-122	21.8559	0.0143095
Ccrd_005812	Chitin-binding type-1 domain-containing protein [Uniprot/SPTREMBL Acc. A0A118JV32]	-10.4265	1.53419e-175	1.48348e-171	104.45	0.0730516
Ccrd_014300	Uncharacterized protein [Uniprot/SPTREMBL Acc. A0A103YDZ1]	-10.2714	2.90451e-50	4.07032e-48	3.09476	0
Ccrd_005080	Uncharacterized protein [Uniprot/SPTREMBL Acc. A0A103XL63]	-9.68642	1.77588e-48	2.20152e-46	31.4212	0
Ccrd_017344		-9.57336	1.34893e-37	1.04348e-35	21.7851	0
Ccrd_020489		-9.49821	6.91475e-100	4.77587e-97	42.3302	0.0562841
Ccrd_016505	Glucan endo-1,3-beta-D-glucosidase [Uniprot/SPTREMBL Acc. A0A103Y9S6]	-9.44179	3.7005e-151	1.43128e-147	59.3932	0.0836835
Ccrd_026735	Cytochrome P450 [Uniprot/SPTREMBL Acc. A0A103KMV6]	-9.38356	6.53666e-138	2.10688e-134	52.1046	0.0700102
Ccrd_007085	Leucine-rich repeat-containing protein [Uniprot/SPTREMBL Acc. A0A124SBK1]	-9.3126	1.51316e-21	4.50201e-20	2.53565	0
Ccrd_017128	PMEI domain-containing protein [Uniprot/SPTREMBL Acc. A0A103Y8N1]	-9.08533	1.14327e-29	6.00805e-28	7.33982	0
Ccrd_017236	AAI domain-containing protein [Uniprot/SPTREMBL Acc. A0A103Y8H3]	-9.04722	1.4927e-67	3.70094e-65	701.137	1.37163
Ccrd_013203	NAC domain-containing protein [Uniprot/SPTREMBL Acc. A0A118K523]	-8.94722	7.96428e-93	4.16274e-90	9.92348	0.015928
Ccrd_016691	ABC transporter domain-containing protein [Uniprot/SPTREMBL Acc. A0A124SG17]	-8.70939	4.32232e-123	6.96579e-120	16.9405	0.0409704
Ccrd_009180		-8.56926	2.5636e-26	1.06848e-24	2.55339	0
Ccrd_025377	Sulfotransferase [Uniprot/SPTREMBL Acc. A0A103XAZ5]	-8.50282	1.87158e-97	1.24808e-94	44.2928	0.101699
Ccrd_023977		-8.44039	4.7164e-49	6.2048e-47	13.7762	0.0374958
Ccrd_018562	1-deoxy-D-xylulose-5-phosphate synthase [Uniprot/SPTREMBL Acc. A0A103Y5Y2]	-8.40891	1.92132e-47	2.27953e-45	4.6445	0.00850444
Ccrd_009726	Cytochrome P450 [Uniprot/SPTREMBL Acc. A0A103YMN8]	-8.38157	3.39463e-17	7.09716e-16	2.05377	0
Ccrd_017125	Barwin-like endoglucanase [Uniprot/SPTREMBL Acc. A0A118K2L7]	-8.35886	1.38291e-172	8.9147e-169	178.242	0.551308
Ccrd_008223	Aquaporin-like protein [Uniprot/SPTREMBL Acc. A0A103XFK6]	-8.08412	1.5238e-20	4.2895e-19	1.86182	0
Ccrd_019961	WD_REPEATS_REGION domain-containing protein [Uniprot/SPTREMBL Acc. A0A103Y3C1]	-8.00757	4.49601e-18	1.02655e-16	1.54917	0
Ccrd_018424		-7.97628	1.76037e-17	3.79108e-16	4.16238	0
Ccrd_008518	Lipase_GDSL domain-containing protein [Uniprot/SPTREMBL Acc. A0A103XF05]	-7.93736	1.83812e-111	1.87092e-108	26.3186	0.115551
Ccrd_013276	Uncharacterized protein [Uniprot/SPTREMBL Acc. A0A103YFY9]	-7.80425	5.32414e-13	7.23058e-12	4.9812	0
Ccrd_010929	Endoglucanase [Uniprot/SPTREMBL Acc. A0A103YK85]	-7.75661	3.21705e-16	6.11745e-15	0.972661	0
Ccrd_019214	Peptidylprolyl isomerase [Uniprot/SPTREMBL Acc. A0A103Y4V5]	-7.72923	1.51115e-17	3.28729e-16	1.08867	0
Ccrd_020551	Cytokinin dehydrogenase [Uniprot/SPTREMBL Acc. A0A118K0A3]	-7.7246	2.79971e-44	2.91094e-42	38.7939	0.183099
Ccrd_001703		-7.71676	7.31301e-16	1.33926e-14	1.26722	0
Ccrd_017089	Uncharacterized protein [Uniprot/SPTREMBL Acc. A0A118K2L8]	-7.68188	1.88164e-17	4.04323e-16	3.16013	0
Ccrd_010597	UDP-glucuronosyl/UDP-glucosyltransferase [Uniprot/SPTREMBL Acc. A0A124SHY3]	-7.64918	2.8834e-36	2.09632e-34	2.66239	0.0127731
Ccrd_018922	AAI domain-containing protein [Uniprot/SPTREMBL Acc. A0A103Y599]	-7.6296	2.44741e-137	6.76149e-134	217.766	1.21833
Ccrd_012771	Uncharacterized protein [Uniprot/SPTREMBL Acc. A0A124SH93]	-7.59153	1.45133e-13	2.10242e-12	1.39352	0
Ccrd_003188	Uncharacterized protein [Uniprot/SPTREMBL Acc. A0A103XQ30]	-7.53108	2.22943e-14	3.50244e-13	4.08217	0
Ccrd_009594		-7.49143	4.50171e-13	6.14386e-12	0.416729	0
Ccrd_022380		-7.47982	1.64879e-14	2.63303e-13	1.13509	0
Ccrd_018959	MFS domain-containing protein [Uniprot/SPTREMBL Acc. A0A118K1E5]	-7.39585	1.01097e-10	1.08257e-09	0.987299	0
Ccrd_019153	Uncharacterized protein [Uniprot/SPTREMBL Acc. A0A118K1A6]	-7.38284	3.50194e-33	2.2132e-31	8.94909	0.0516215
Ccrd_009725	Cytochrome P450 [Uniprot/SPTREMBL Acc. A0A103YML0]	-7.29891	1.10722e-68	2.89359e-66	100.15	0.647451
Ccrd_012957	Concanavalin A-like lectin/glucanase, subgroup [Uniprot/SPTREMBL Acc. A0A124SH75]	-7.29666	1.58397e-13	2.28259e-12	0.603449	0
Ccrd_006705	Chitin-binding type-1 domain-containing protein [Uniprot/SPTREMBL Acc. A0A103XI86]	-7.28435	4.02047e-12	5.03901e-11	0.84316	0
Ccrd_017903	ER lumen protein retaining receptor [Uniprot/SPTREMBL Acc. A0A118K249]	-7.26628	8.19087e-14	1.2055e-12	1.66998	0
Ccrd_018447		-7.23142	7.44974e-12	9.02697e-11	3.17401	0
Ccrd_010906		-7.22326	3.91036e-14	5.96392e-13	1.76917	0
Ccrd_018476	Non-specific lipid-transfer protein [Uniprot/SPTREMBL Acc. A0A118K1R6]	-7.10864	1.45984e-10	1.53935e-09	1.57756	0
Ccrd_004859	Uncharacterized protein [Uniprot/SPTREMBL Acc. A0A103XLP0]	-7.08681	2.79403e-84	1.28652e-81	10.3855	0.0762755
Ccrd_012865	Chlorophyll a-b binding protein, chloroplastic [Uniprot/SPTREMBL Acc. A0A103YGM7]	-7.02497	2.81385e-12	3.58006e-11	1.10807	0
Ccrd_024896	NAD(P)-bd_dom domain-containing protein [Uniprot/SPTREMBL Acc. A0A103XDS7]	-7.01728	1.00643e-12	1.34045e-11	0.827323	0
Ccrd_012556	Transcription factor, K-box [Uniprot/SPTREMBL Acc. A0A124SHB8]	-7.00096	2.12229e-11	2.44013e-10	1.75121	0
Ccrd_000444		-6.96959	5.46556e-12	6.71527e-11	2.76376	0
Ccrd_018451	RING-type domain-containing protein [Uniprot/SPTREMBL Acc. A0A124SFH3]	-6.92587	4.35442e-27	1.89236e-25	6.48396	0.0513178
Ccrd_010086	Uncharacterized protein [Uniprot/SPTREMBL Acc. A0A103YLS5]	-6.80895	1.60758e-08	1.28414e-07	0.531355	0
Ccrd_003002	Non-specific lipid-transfer protein [Uniprot/SPTREMBL Acc. A0A124SCU9]	-6.76067	2.08194e-07	1.39173e-06	0.871257	0
Ccrd_026875	Jacalin-type lectin domain-containing protein [Uniprot/SPTREMBL Acc. A0A118F0A9]	-6.74295	1.12472e-07	7.90372e-07	1.0615	0
Ccrd_026859	Chitin-binding type-1 domain-containing protein [Uniprot/SPTREMBL Acc. A0A124PZK7]	-6.72789	1.3781e-95	8.59715e-93	74.3486	0.714422
Ccrd_004659	Caffeoyl-CoA O-methyltransferase [Uniprot/SPTREMBL Acc. A0A118JVM7]	-6.66395	3.61427e-81	1.51949e-78	33.6326	0.369132
Ccrd_018027	Fatty acid desaturase, type 1 [Uniprot/SPTREMBL Acc. A0A124SFM2]	-6.65399	3.67245e-131	8.87769e-128	81.8437	0.857717
Ccrd_003023	Non-specific lipid-transfer protein [Uniprot/SPTREMBL Acc. A0A103XQA2]	-6.60377	1.06184e-06	6.25492e-06	1.15645	0
Ccrd_006268	Uncharacterized protein [Uniprot/SPTREMBL Acc. A0A103XJ31]	-6.5497	3.18129e-68	8.20306e-66	11.2573	0.122997
Ccrd_018497		-6.52926	1.08078e-06	6.36071e-06	0.513276	0
Ccrd_017123		-6.52783	1.95312e-08	1.53542e-07	0.539549	0
Ccrd_001771	HVA22-like protein [Uniprot/SPTREMBL Acc. A0A103XSL3]	-6.51774	4.74652e-74	1.6104e-71	1123.84	13.2341
Ccrd_006772	SPX domain-containing protein [Uniprot/SPTREMBL Acc. A0A103XI89]	-6.51625	3.54593e-12	4.47324e-11	3.00535	0.0300483
Ccrd_007087	LRRNT_2 domain-containing protein [Uniprot/SPTREMBL Acc. A0A124SBK3]	-6.49192	1.92059e-35	1.34088e-33	3.8564	0.0401452
Ccrd_016637	Pectate lyase [Uniprot/SPTREMBL Acc. A0A103Y9M5]	-6.49103	1.99345e-61	3.97436e-59	12.9272	0.156125
Ccrd_002260	RRM domain-containing protein [Uniprot/SPTREMBL Acc. A0A103XRS8]	-6.4804	1.95918e-08	1.53956e-07	0.400176	0
Ccrd_006708	Chitin-binding type-1 domain-containing protein [Uniprot/SPTREMBL Acc. A0A103XIB5]	-6.44628	7.57955e-108	6.37308e-105	32.9018	0.394397
Ccrd_004252	Protein kinase domain-containing protein [Uniprot/SPTREMBL Acc. A0A103XN09]	-6.42479	3.77583e-09	3.33124e-08	0.285753	0
Ccrd_021581		-6.40304	9.08165e-52	1.351e-49	19.8728	0.259088
Ccrd_026328	Protein kinase domain-containing protein [Uniprot/SPTREMBL Acc. A0A103XD89]	-6.38949	1.0101e-06	5.98847e-06	0.218306	0
Ccrd_008080	Auxin-responsive protein [Uniprot/SPTREMBL Acc. A0A103XFW0]	-6.3861	2.07973e-08	1.62834e-07	0.584952	0
Ccrd_010178	Non-specific lipid-transfer protein [Uniprot/SPTREMBL Acc. A0A103YLL2]	-6.379	3.44996e-08	2.63502e-07	0.934739	0
Ccrd_016964		-6.36248	6.54509e-126	1.15069e-122	80.1061	1.06448
Ccrd_019691	C4-dicarboxylate transporter/malic acid transport protein [Uniprot/SPTREMBL Acc. A0A118K0Y5]	-6.31935	4.09703e-07	2.60719e-06	0.524617	0
Ccrd_014855	Phenylalanine ammonia-lyase [Uniprot/SPTREMBL Acc. A0A103YCX4]	-6.25799	7.76936e-103	5.77891e-100	41.348	0.599583
Ccrd_009632	RHOMBOID-like protein [Uniprot/SPTREMBL Acc. A0A103YMU8]	-6.21348	2.46412e-39	2.02781e-37	10.0435	0.140711
Ccrd_011445	Uncharacterized protein [Uniprot/SPTREMBL Acc. A0A103YJD9]	-6.2038	1.33392e-71	4.09472e-69	60.7951	0.851373
Ccrd_005436	Lipase_3 domain-containing protein [Uniprot/SPTREMBL Acc. A0A103XKM8]	-6.17227	1.72521e-06	9.81867e-06	0.392763	0
Ccrd_020901		-6.123	1.68934e-14	2.69555e-13	4.01262	0.0359693
Ccrd_019685	Rcd1 [Uniprot/SPTREMBL Acc. A0A103Y3W8]	-6.07776	3.01702e-13	4.21576e-12	6.16563	0.0762186
Ccrd_008677		-6.04582	5.35957e-07	3.33012e-06	0.705354	0
Ccrd_024826		-5.99753	1.5996e-36	1.17623e-34	2.84424	0.0489952
Ccrd_014444	PMEI domain-containing protein [Uniprot/SPTREMBL Acc. A0A103YDQ3]	-5.99636	3.25534e-42	3.07098e-40	10.8494	0.150659
Ccrd_017603	Aa_trans domain-containing protein [Uniprot/SPTREMBL Acc. A0A118K2B6]	-5.94876	1.11955e-05	5.48402e-05	0.342475	0
Ccrd_006948	HTH myb-type domain-containing protein [Uniprot/SPTREMBL Acc. A0A103XHT3]	-5.94618	1.23575e-27	5.64968e-26	6.54946	0.102542
Ccrd_005375	Hexosyltransferase [Uniprot/SPTREMBL Acc. A0A103XKT7]	-5.94573	7.60346e-24	2.64943e-22	6.32811	0.121756
Ccrd_020213	WRKY domain-containing protein [Uniprot/SPTREMBL Acc. A0A118K0J3]	-5.88397	8.13449e-45	8.54961e-43	9.35184	0.154549
Ccrd_022542	Photosystem II 10 kDa polypeptide, chloroplastic [Uniprot/SPTREMBL Acc. A0A103XYL7]	-5.79117	3.74044e-85	1.7643e-82	52.3757	1.00013
Ccrd_021045		-5.78806	7.92246e-15	1.31063e-13	1.31566	0.0228577
Ccrd_010004	Auxin-responsive protein [Uniprot/SPTREMBL Acc. A0A124SI47]	-5.78095	2.75477e-73	9.18525e-71	14.2107	0.251845
Ccrd_022910	Chlorophyll a-b binding protein, chloroplastic [Uniprot/SPTREMBL Acc. A0A124SE34]	-5.75818	1.53638e-34	1.03888e-32	10.107	0.209734
Ccrd_019356	Oleosin [Uniprot/SPTREMBL Acc. A0A103Y4G9]	-5.75094	3.32291e-13	4.61318e-12	2.65206	0.0309519
Ccrd_021839		-5.73265	4.18381e-14	6.34594e-13	1.19756	0.0217376
Ccrd_020506		-5.71456	1.10268e-70	3.23102e-68	122.465	2.49023
Ccrd_010671		-5.64999	0.000164019	0.000636172	0.274668	0
Ccrd_007638		-5.63992	1.97831e-31	1.13865e-29	35.4255	0.729611
Ccrd_011599	Concanavalin A-like lectin/glucanase superfamily [Uniprot/SPTREMBL Acc. A0A124SHM4]	-5.63291	5.09313e-27	2.19368e-25	2.53466	0.0566498
Ccrd_003225	UDP-glucuronosyl/UDP-glucosyltransferase [Uniprot/SPTREMBL Acc. A0A103XQ50]	-5.59405	6.53123e-05	0.000275137	0.242994	0
Ccrd_022661	BHLH domain-containing protein [Uniprot/SPTREMBL Acc. A0A103XYD8]	-5.56435	1.79745e-11	2.08149e-10	1.39103	0.0187959
Ccrd_023588		-5.56229	1.98337e-41	1.80926e-39	180.965	4.14181
Ccrd_024599		-5.55963	2.31347e-08	1.80332e-07	22.6583	0.543248
Ccrd_009741	Chloramphenicol acetyltransferase-like domain-containing protein [Uniprot/SPTREMBL Acc. A0A103YMP3]	-5.546	1.49191e-17	3.24911e-16	2.09556	0.0361724
Ccrd_001585	Uncharacterized protein [Uniprot/SPTREMBL Acc. A0A103XT00]	-5.51119	7.47846e-94	4.13217e-91	79.362	1.92273
Ccrd_011352		-5.48665	1.8632e-53	2.90583e-51	25.8673	0.600528
Ccrd_005774	WRKY domain-containing protein [Uniprot/SPTREMBL Acc. A0A103XKA8]	-5.41957	3.11913e-09	2.77651e-08	1.36035	0.0294731
Ccrd_002595	AP2/ERF domain-containing protein [Uniprot/SPTREMBL Acc. A0A103XR42]	-5.40396	3.52818e-115	4.54877e-112	41.3948	1.0149
Ccrd_010627	NAC domain-containing protein [Uniprot/SPTREMBL Acc. A0A103YKW4]	-5.32861	3.40762e-92	1.73421e-89	403.83	10.599
Ccrd_018808	NAC domain-containing protein [Uniprot/SPTREMBL Acc. A0A103Y5J2]	-5.30071	1.25783e-32	7.64942e-31	15.0919	0.382154
Ccrd_011779	Expansin [Uniprot/SPTREMBL Acc. A0A103YIN6]	-5.27603	3.15317e-18	7.33803e-17	9.82134	0.26244
Ccrd_007135	Leucine-rich repeat-containing protein [Uniprot/SPTREMBL Acc. A0A103XHL8]	-5.27468	1.68083e-12	2.18305e-11	1.38099	0.0331862
Ccrd_002913		-5.27011	3.23911e-49	4.32008e-47	10.0468	0.271974
Ccrd_018165	NAC domain-containing protein [Uniprot/SPTREMBL Acc. A0A103Y6R1]	-5.24847	4.84101e-71	1.46282e-68	17.381	0.466468
Ccrd_024717	NSF attachment protein [Uniprot/SPTREMBL Acc. A0A103XC04]	-5.23195	5.64002e-47	6.53127e-45	5.20811	0.13677
Ccrd_001576	BZIP domain-containing protein [Uniprot/SPTREMBL Acc. A0A118JX27]	-5.2203	7.17983e-10	6.93213e-09	2.07981	0.0541865
Ccrd_005078	TCP domain-containing protein [Uniprot/SPTREMBL Acc. A0A103XL90]	-5.21088	3.67726e-32	2.19489e-30	6.65439	0.192479
Ccrd_010897	Knot1 domain-containing protein [Uniprot/SPTREMBL Acc. A0A103YK99]	-5.19869	2.48727e-81	1.06892e-78	8945.25	259.938
Ccrd_014607		-5.18169	3.13693e-14	4.86098e-13	2.32483	0.0752793
Ccrd_018944	Transcription factor, K-box [Uniprot/SPTREMBL Acc. A0A103Y5A4]	-5.17406	4.71891e-09	4.10892e-08	1.91907	0.0507211
Ccrd_018690	4-coumarate--CoA ligase [Uniprot/SPTREMBL Acc. A0A118K1K9]	-5.17044	8.69458e-24	3.00795e-22	2.91373	0.086984
Ccrd_007324	NAC domain-containing protein [Uniprot/SPTREMBL Acc. A0A103XH44]	-5.12487	1.05994e-19	2.78508e-18	4.92103	0.140784
Ccrd_022620	Lipase_GDSL domain-containing protein [Uniprot/SPTREMBL Acc. A0A103XY78]	-5.11997	1.05509e-61	2.17068e-59	19.8532	0.584934
Ccrd_007084	LRRNT_2 domain-containing protein [Uniprot/SPTREMBL Acc. A0A103XHR3]	-5.09676	7.98686e-41	7.11788e-39	4.64137	0.139556
Ccrd_009294	Acyl-[acyl-carrier-protein] hydrolase [Uniprot/SPTREMBL Acc. A0A103YNF1]	-5.07754	2.33521e-14	3.65538e-13	0.527202	0.0173843
Ccrd_016335	BHLH domain-containing protein [Uniprot/SPTREMBL Acc. A0A103YA50]	-5.00729	6.0544e-70	1.62619e-67	21.0694	0.6691
Ccrd_009385	Auxin responsive SAUR protein [Uniprot/SPTREMBL Acc. A0A124SIC2]	-4.97742	5.05524e-12	6.25085e-11	3.73684	0.0954493
Ccrd_022443	Homeobox domain-containing protein [Uniprot/SPTREMBL Acc. A0A103XYR6]	-4.97641	2.65103e-11	3.00694e-10	1.19586	0.0413461
Ccrd_013799	Auxin efflux carrier component [Uniprot/SPTREMBL Acc. A0A103YEX0]	-4.95732	3.22339e-59	5.88086e-57	17.4333	0.606932
Ccrd_016490		-4.94533	1.67876e-10	1.7587e-09	14.991	0.486782
Ccrd_009674	Cytochrome P450 [Uniprot/SPTREMBL Acc. A0A124SI86]	-4.93988	3.12572e-18	7.28294e-17	2.47522	0.0794663
Ccrd_007086	LRRNT_2 domain-containing protein [Uniprot/SPTREMBL Acc. A0A118JTJ5]	-4.93278	4.5928e-05	0.000199417	0.341395	0.00846378
Ccrd_018770	Homeobox domain-containing protein [Uniprot/SPTREMBL Acc. A0A103Y5M0]	-4.90676	4.62345e-23	1.52582e-21	4.75981	0.178575
Ccrd_012305	GED domain-containing protein [Uniprot/SPTREMBL Acc. A0A103YHP7]	-4.9062	8.93935e-09	7.44522e-08	0.703144	0.0147926
Ccrd_021736	Chloramphenicol acetyltransferase-like domain-containing protein [Uniprot/SPTREMBL Acc. A0A103XZX5]	-4.88613	2.7041e-63	6.01087e-61	52.9165	1.9286
Ccrd_007877	Homeobox domain-containing protein [Uniprot/SPTREMBL Acc. A0A118JTT5]	-4.88555	5.64892e-26	2.27593e-24	4.82884	0.174288
Ccrd_026616	Polyphenol oxidase, central domain-containing protein [Uniprot/SPTREMBL Acc. A0A103MFI0]	-4.84788	1.04464e-11	1.24859e-10	4.52082	0.153807
Ccrd_015561	Chloramphenicol acetyltransferase-like domain-containing protein [Uniprot/SPTREMBL Acc. A0A103YBK8]; Hydroxycinnamoyl-CoA:quinate hydroxycinnamoyltransferase [Uniprot/SPTREMBL Acc. A4U7G0]	-4.81968	7.17125e-49	9.24565e-47	158.106	5.9256
Ccrd_018311		-4.8091	1.29779e-11	1.53223e-10	5.62984	0.191737
Ccrd_007979	Uncharacterized protein [Uniprot/SPTREMBL Acc. A0A103XG56]	-4.80799	7.09765e-33	4.41355e-31	6.34677	0.210365
Ccrd_013908	HTH myb-type domain-containing protein [Uniprot/SPTREMBL Acc. A0A118K4M8]	-4.78492	5.30254e-28	2.51955e-26	13.0043	0.500435
Ccrd_001291	Uncharacterized protein [Uniprot/SPTREMBL Acc. A0A103XTL1]	-4.78026	1.0251e-62	2.20272e-60	56.8459	2.23903
Ccrd_002148	Delta(24)-sterol reductase [Uniprot/SPTREMBL Acc. A0A118JX76]	-4.76749	6.72969e-18	1.52574e-16	2.05831	0.0726472
Ccrd_006997		-4.76496	9.24961e-23	2.9813e-21	0.604129	0.021222
Ccrd_007962		-4.73739	6.06628e-15	1.01748e-13	5.65158	0.195285
Ccrd_003622	Uncharacterized protein [Uniprot/SPTREMBL Acc. A0A103XP08]	-4.71528	2.94632e-17	6.19336e-16	14.7155	0.521234
Ccrd_018356	Ubiquitinyl hydrolase 1 [Uniprot/SPTREMBL Acc. A0A124SFI3]	-4.71088	1.27448e-11	1.50931e-10	0.657975	0.023083
Ccrd_018719	4-coumarate--CoA ligase [Uniprot/SPTREMBL Acc. A0A103Y5R1]	-4.70471	9.00123e-60	1.69005e-57	288.126	11.7936
Ccrd_025505	Glycosyltransferase [Uniprot/SPTREMBL Acc. A0A103WW45]	-4.69352	2.75983e-54	4.52308e-52	8.14758	0.331399
Ccrd_013780	Electron transport accessory protein-like domain-containing protein [Uniprot/SPTREMBL Acc. A0A103YEZ0]	-4.68833	1.35837e-33	8.78577e-32	11.6322	0.459444
Ccrd_016187	Glycoside hydrolase, catalytic domain-containing protein [Uniprot/SPTREMBL Acc. A0A103YAG5]	-4.65489	2.17182e-96	1.40003e-93	78.3467	3.32854
Ccrd_001456	Bet_v_1 domain-containing protein [Uniprot/SPTREMBL Acc. A0A103XT85]	-4.64112	3.45934e-10	3.4953e-09	2.53413	0.0983048
Ccrd_009630	Expansin [Uniprot/SPTREMBL Acc. A0A103YMU5]	-4.64089	4.96035e-12	6.13744e-11	150.88	6.91965
Ccrd_010303		-4.63034	4.05149e-19	1.01888e-17	13.4201	0.599643
Ccrd_023366	CYC/TB1, R domain-containing protein [Uniprot/SPTREMBL Acc. A0A103XX05]	-4.61651	2.40545e-20	6.66462e-19	3.46479	0.125603
Ccrd_001286	HTH myb-type domain-containing protein [Uniprot/SPTREMBL Acc. A0A118JX39]	-4.61303	3.07752e-06	1.66946e-05	0.863773	0.0221314
Ccrd_002570	Dirigent protein [Uniprot/SPTREMBL Acc. A0A103XR82]	-4.6047	2.84509e-35	1.97209e-33	886.103	39.2422
Ccrd_024434	Protein kinase domain-containing protein [Uniprot/SPTREMBL Acc. A0A118JRU5]	-4.60095	3.06595e-24	1.10004e-22	4.31092	0.177291
Ccrd_004380	PMR5N domain-containing protein [Uniprot/SPTREMBL Acc. A0A103XMY7]	-4.58843	1.19153e-17	2.62183e-16	2.03893	0.0765393
Ccrd_009383	PMEI domain-containing protein [Uniprot/SPTREMBL Acc. A0A103YNE6]	-4.57771	8.26213e-28	3.85015e-26	33.8714	1.49562
Ccrd_011107	Chlorophyll a-b binding protein, chloroplastic [Uniprot/SPTREMBL Acc. A0A103YJY3]	-4.57079	4.82835e-12	5.98624e-11	2.04935	0.0756882
Ccrd_005037	Cytochrome P450 [Uniprot/SPTREMBL Acc. A0A103XLI8]	-4.5668	2.64313e-95	1.59736e-92	98.3597	4.43252
Ccrd_012355		-4.56025	2.18968e-12	2.81745e-11	3.90942	0.184227
Ccrd_012228	ELK-like protein [Uniprot/SPTREMBL Acc. A0A118K5P4]	-4.55888	3.59808e-16	6.79524e-15	2.2479	0.0953964
Ccrd_026351	Leucine-rich repeat-containing protein [Uniprot/SPTREMBL Acc. A0A103QTW6]	-4.55668	3.55057e-18	8.23316e-17	14.9481	0.675445
Ccrd_009203	MFS domain-containing protein [Uniprot/SPTREMBL Acc. A0A103YNI8]	-4.5367	1.18031e-07	8.26733e-07	0.712114	0.0331083
Ccrd_008338		-4.51217	3.8271e-20	1.0395e-18	3.80032	0.158765
Ccrd_022450	WAT1-related protein [Uniprot/SPTREMBL Acc. A0A103XYP9]	-4.49392	4.72333e-41	4.24858e-39	163.378	7.90741
Ccrd_014951	Endoglucanase [Uniprot/SPTREMBL Acc. A0A103YCR7]	-4.49136	1.41837e-29	7.41348e-28	7.85645	0.398229
Ccrd_011293		-4.42933	1.0277e-35	7.28007e-34	11.6261	0.548428
Ccrd_007587	Pectate lyase [Uniprot/SPTREMBL Acc. A0A103XH01]	-4.41677	1.48943e-11	1.74042e-10	14.8238	0.761539
Ccrd_000749		-4.40589	4.52378e-14	6.82945e-13	2.51796	0.121275
Ccrd_022715	Aquaporin-like protein [Uniprot/SPTREMBL Acc. A0A118JZE6]	-4.38873	1.45114e-22	4.61574e-21	13.3339	0.649294
Ccrd_022733	4-coumarate--CoA ligase [Uniprot/SPTREMBL Acc. A0A103XY74]	-4.38844	1.11367e-118	1.53837e-115	93.6658	4.78946
Ccrd_011946		-4.38773	1.11794e-08	9.19605e-08	3.33385	0.16254
Ccrd_001484		-4.37438	4.87557e-06	2.56428e-05	1.17793	0.0605836
Ccrd_009593	Very-long-chain (3R)-3-hydroxyacyl-CoA dehydratase [Uniprot/SPTREMBL Acc. A0A103YMV2]	-4.37158	6.00868e-12	7.36387e-11	2.64086	0.131173
Ccrd_010057		-4.35907	7.82998e-11	8.47838e-10	1.77024	0.0792943
Ccrd_018445	Non-specific lipid-transfer protein [Uniprot/SPTREMBL Acc. A0A124SFH4]	-4.34406	1.05628e-64	2.40322e-62	12581.1	670.211
Ccrd_013526	Chitin-binding type-1 domain-containing protein [Uniprot/SPTREMBL Acc. A0A103YFF5]	-4.33798	9.21801e-51	1.31079e-48	542.681	28.9006
Ccrd_007643	Lipase_GDSL domain-containing protein [Uniprot/SPTREMBL Acc. A0A103XGM1]	-4.33485	4.94483e-50	6.87971e-48	18.5595	0.959166
Ccrd_026466	Glycoside hydrolase, catalytic domain-containing protein [Uniprot/SPTREMBL Acc. A0A103PTF4]	-4.31717	2.36201e-11	2.70289e-10	1.55008	0.0861672
Ccrd_009702	Copper transporter [Uniprot/SPTREMBL Acc. A0A103YMU7]	-4.30916	2.88502e-80	1.13864e-77	547.647	29.1968
Ccrd_006696	Protein kinase-like domain-containing protein [Uniprot/SPTREMBL Acc. A0A103XIJ4]	-4.30141	1.43468e-11	1.68255e-10	0.577383	0.0318991
Ccrd_002662	Dof-type domain-containing protein [Uniprot/SPTREMBL Acc. A0A103XQZ2]	-4.28469	5.48908e-15	9.25486e-14	17.9766	0.984211
Ccrd_026325	Leucine-rich repeat-containing protein [Uniprot/SPTREMBL Acc. A0A103R4U3]	-4.19889	2.86657e-37	2.19117e-35	5.61261	0.312718
Ccrd_010043	Carbohydrate-binding domain family 9-like protein [Uniprot/SPTREMBL Acc. A0A103YLY2]	-4.19573	4.24322e-05	0.000185403	0.730888	0.0413135
Ccrd_022221	Extensin_2 domain-containing protein [Uniprot/SPTREMBL Acc. A0A103XZ38]	-4.19295	3.76537e-21	1.09998e-19	426.407	26.0671
Ccrd_020044		-4.17349	2.11657e-27	9.43144e-26	5.63881	0.329669
Ccrd_012611	Protein kinase domain-containing protein [Uniprot/SPTREMBL Acc. A0A103YH53]	-4.16885	1.1242e-07	7.90291e-07	0.452067	0.0257457
Ccrd_011032	Carotenoid oxygenase [Uniprot/SPTREMBL Acc. A0A118K6F5]	-4.16778	1.34379e-14	2.17106e-13	1.64571	0.0981519
Ccrd_002899	WRKY domain-containing protein [Uniprot/SPTREMBL Acc. A0A124SCW0]	-4.15392	2.25547e-08	1.75952e-07	1.36923	0.0784428
Ccrd_024124		-4.15089	2.22376e-48	2.7392e-46	166.397	10.2184
Ccrd_020343	1-deoxy-D-xylulose-5-phosphate synthase [Uniprot/SPTREMBL Acc. A0A103Y2M9]	-4.13018	5.61311e-06	2.9212e-05	0.318427	0.0171729
Ccrd_014972	Homeobox domain-containing protein [Uniprot/SPTREMBL Acc. A0A103YCQ8]	-4.1282	5.47308e-25	2.05124e-23	42.8984	2.64657
Ccrd_012331	Arogenate dehydratase [Uniprot/SPTREMBL Acc. A0A103YHL0]	-4.12614	6.19098e-100	4.43434e-97	222.57	13.7195
Ccrd_017082	Oligopeptide transporter OPT superfamily [Uniprot/SPTREMBL Acc. A0A118K2N0]	-4.12519	5.35606e-43	5.23135e-41	19.8019	1.1897
Ccrd_021862		-4.12442	1.27515e-66	3.04447e-64	22.3265	1.39235
Ccrd_021947	Protein kinase domain-containing protein [Uniprot/SPTREMBL Acc. A0A103XZQ5]	-4.08623	4.79094e-32	2.83339e-30	3.04957	0.184675
Ccrd_010182	Mannose-binding lectin [Uniprot/SPTREMBL Acc. A0A103YLS7]	-4.08372	1.28401e-12	1.69267e-11	1.76825	0.0920753
Ccrd_002727	Tetraspanin [Uniprot/SPTREMBL Acc. A0A118JW69]	-4.06977	1.38925e-77	5.0692e-75	122.655	7.78396
Ccrd_000886		-4.05808	2.27443e-11	2.60422e-10	2.50676	0.138019
Ccrd_018423	Phosphoinositide phospholipase C [Uniprot/SPTREMBL Acc. A0A103Y681]	-4.05798	5.4443e-44	5.54144e-42	280.949	18.2198
Ccrd_018951		-4.05119	1.65148e-33	1.0646e-31	188.181	12.4113
Ccrd_023414	Amino acid transporter, transmembrane [Uniprot/SPTREMBL Acc. A0A103XWV7]	-4.03688	4.42515e-30	2.39714e-28	20.8829	1.3738
Ccrd_026205	ZF-HD dimerization-type domain-containing protein [Uniprot/SPTREMBL Acc. A0A103RZT6]	-4.02047	9.88963e-08	7.01083e-07	22.8209	1.41018
Ccrd_026760	DAO_C domain-containing protein [Uniprot/SPTREMBL Acc. A0A103K8K3]	-4.01185	1.21517e-19	3.1757e-18	16.7616	1.12236
Ccrd_026203	Terpene_synth domain-containing protein [Uniprot/SPTREMBL Acc. A0A103S159]	-4.0047	2.84897e-19	7.21156e-18	3.44153	0.216957
Ccrd_015804	Uncharacterized protein [Uniprot/SPTREMBL Acc. A0A118K3F4]	-4.00334	3.47786e-32	2.0823e-30	77.5526	5.26804
Ccrd_011292		-4.00222	1.81092e-08	1.43237e-07	1.13217	0.073238
Ccrd_010725	MADS-box domain-containing protein [Uniprot/SPTREMBL Acc. A0A118K6L8]	-3.98889	2.55686e-16	4.91034e-15	14.4391	1.02636
Ccrd_001288	GH16 domain-containing protein [Uniprot/SPTREMBL Acc. A0A118JXR9]	-3.96122	6.84639e-22	2.0818e-20	236.158	16.6224
Ccrd_003069	O-fucosyltransferase family protein [Uniprot/SPTREMBL Acc. A0A103XQ59]	-3.95976	3.90971e-07	2.49537e-06	0.33829	0.0240663
Ccrd_009859	Chloramphenicol acetyltransferase-like domain-containing protein [Uniprot/SPTREMBL Acc. D6BK25]	-3.95702	2.16627e-75	7.61698e-73	58.6969	4.0156
Ccrd_015574		-3.9516	3.91973e-18	9.05763e-17	1.57365	0.100712
Ccrd_007613	ABC-2 type transporter [Uniprot/SPTREMBL Acc. A0A124SBE6]	-3.93934	1.09965e-18	2.65826e-17	4.4736	0.287614
Ccrd_002063	C3H1-type domain-containing protein [Uniprot/SPTREMBL Acc. A0A103XS19]	-3.9248	1.95643e-28	9.55441e-27	8.04334	0.59172
Ccrd_019657	DNMT1-RFD domain-containing protein [Uniprot/SPTREMBL Acc. A0A124SF43]	-3.92083	3.16785e-07	2.05099e-06	2.05409	0.131111
Ccrd_006119	Cytochrome P450 [Uniprot/SPTREMBL Acc. A0A103XJH9]	-3.91829	9.14238e-62	1.90112e-59	32.367	2.31154
Ccrd_003037	CASP-like protein [Uniprot/SPTREMBL Acc. A0A103XQ75]	-3.91409	7.32768e-05	0.000305146	1.08834	0.0563876
Ccrd_004446		-3.87233	9.91689e-07	5.88832e-06	0.672439	0.050752
Ccrd_000561	PSI-F [Uniprot/SPTREMBL Acc. A0A103XV29]	-3.86721	1.61969e-12	2.1093e-11	2.6362	0.196247
Ccrd_019056		-3.8596	8.94959e-38	7.09328e-36	9.60734	0.718657
Ccrd_012965	BHLH domain-containing protein [Uniprot/SPTREMBL Acc. A0A103YGG2]	-3.85931	3.74828e-52	5.66312e-50	218.042	16.1865
Ccrd_009199	RING-type domain-containing protein [Uniprot/SPTREMBL Acc. A0A103YNP1]	-3.82509	5.50747e-17	1.12351e-15	4.82244	0.378336
Ccrd_011825		-3.79669	1.961e-15	3.46652e-14	5.27112	0.38447
Ccrd_026002	Uncharacterized protein [Uniprot/SPTREMBL Acc. A0A118IBY2]	-3.79175	3.97596e-25	1.50178e-23	14.7479	1.10454
Ccrd_017865	Protein kinase domain-containing protein [Uniprot/SPTREMBL Acc. A0A103Y7B0]	-3.79063	5.28608e-71	1.57273e-68	28.5129	2.1943
Ccrd_021416		-3.77758	2.38158e-28	1.14856e-26	159.504	12.8003
Ccrd_010555		-3.77487	1.04799e-54	1.76235e-52	22.4889	1.72436
Ccrd_011644	LRRNT_2 domain-containing protein [Uniprot/SPTREMBL Acc. A0A103YIX6]	-3.7712	1.07254e-05	5.27513e-05	0.173196	0.0119562
Ccrd_005257	Amino acid transporter, transmembrane [Uniprot/SPTREMBL Acc. A0A103XL66]	-3.768	5.11362e-15	8.64443e-14	1.98184	0.143275
Ccrd_010064		-3.74954	7.2181e-42	6.74352e-40	54.9495	4.37703
Ccrd_026337		-3.74895	3.28444e-34	2.19027e-32	7.89249	0.627966
Ccrd_015168	Phytocyanin domain-containing protein [Uniprot/SPTREMBL Acc. A0A103YCC8]	-3.74531	2.1537e-07	1.43671e-06	1.39586	0.102378
Ccrd_020496		-3.73693	4.44844e-15	7.56627e-14	2.58157	0.197729
Ccrd_024058	Major facilitator superfamily domain, general substrate transporter [Uniprot/SPTREMBL Acc. A0A103DT18]	-3.73462	1.34145e-07	9.28166e-07	4.82919	0.403366
Ccrd_026744	CCT domain-containing protein [Uniprot/SPTREMBL Acc. A0A103XD17]	-3.72904	5.78851e-10	5.65088e-09	3.34134	0.24676
Ccrd_004442	Ferredoxin [Uniprot/SPTREMBL Acc. A0A103XMU8]	-3.71064	1.92508e-29	9.95433e-28	52.4186	4.32687
Ccrd_026626	Uncharacterized protein [Uniprot/SPTREMBL Acc. A0A103XD31]	-3.70998	1.69902e-17	3.66302e-16	3.78724	0.293176
Ccrd_008463		-3.70579	9.37347e-18	2.086e-16	5.49594	0.443628
Ccrd_009779	Adenosinetriphosphatase [Uniprot/SPTREMBL Acc. A0A103YMI7]	-3.70372	2.68796e-61	5.24049e-59	80.7672	6.68287
Ccrd_000859	AP2/ERF domain-containing protein [Uniprot/SPTREMBL Acc. A0A124SDI4]	-3.69746	2.85771e-07	1.86581e-06	6.1372	0.482754
Ccrd_004026	STAS domain-containing protein [Uniprot/SPTREMBL Acc. A0A118JVX4]	-3.6889	5.7107e-16	1.05683e-14	8.78553	0.711974
Ccrd_015239	Expansin [Uniprot/SPTREMBL Acc. A0A103YC73]	-3.68767	1.12814e-05	5.52472e-05	0.540196	0.0468614
Ccrd_001186	ALOG domain-containing protein [Uniprot/SPTREMBL Acc. A0A103XTQ1]	-3.68744	5.41167e-26	2.18946e-24	4.1647	0.347758
Ccrd_005394	Dof-type domain-containing protein [Uniprot/SPTREMBL Acc. A0A124SC40]	-3.67968	4.65437e-47	5.45521e-45	189.033	15.8597
Ccrd_023760		-3.6643	1.54045e-07	1.05268e-06	1.09613	0.0963134
Ccrd_022256	Receptor-like serine/threonine-protein kinase [Uniprot/SPTREMBL Acc. A0A103XZ33]	-3.65075	2.10169e-37	1.61288e-35	6.01728	0.498353
Ccrd_014023	Oligopeptide transporter OPT superfamily [Uniprot/SPTREMBL Acc. A0A103YEI0]	-3.64412	8.67038e-09	7.23992e-08	6.50841	0.612926
Ccrd_025132	FAD-binding PCMH-type domain-containing protein [Uniprot/SPTREMBL Acc. A0A103XBC3]	-3.62908	6.61215e-09	5.61583e-08	0.62436	0.055052
Ccrd_008856	Abhydrolase_3 domain-containing protein [Uniprot/SPTREMBL Acc. A0A103XED5]	-3.62101	1.87936e-46	2.13794e-44	20.9333	1.84749
Ccrd_000721	AP2/ERF domain-containing protein [Uniprot/SPTREMBL Acc. A0A103XUL1]	-3.61644	2.98141e-07	1.93937e-06	1.2557	0.0860293
Ccrd_009181	Allergen Ole e 1, conserved site-containing protein [Uniprot/SPTREMBL Acc. A0A124SID8]	-3.60446	2.19554e-05	0.000102164	0.684397	0.0522763
Ccrd_024951	Protein kinase domain-containing protein [Uniprot/SPTREMBL Acc. A0A103XBP3]	-3.60382	9.16981e-22	2.76223e-20	11.3201	0.973059
Ccrd_009557	Auxin responsive SAUR protein [Uniprot/SPTREMBL Acc. A0A118K7C5]	-3.59696	1.78973e-11	2.07379e-10	16.1684	1.48781
Ccrd_021185	Major facilitator superfamily domain, general substrate transporter [Uniprot/SPTREMBL Acc. A0A118JZZ6]	-3.59651	3.79264e-14	5.79809e-13	1.65305	0.15502
Ccrd_001862	Epimerase domain-containing protein [Uniprot/SPTREMBL Acc. A0A103XSH4]	-3.59038	1.07127e-15	1.9362e-14	4.43514	0.367412
Ccrd_012713	Xyloglucan:xyloglucosyl transferase [Uniprot/SPTREMBL Acc. A0A118K5C6]	-3.58543	6.26652e-09	5.34339e-08	1.47068	0.121597
Ccrd_009042	Lipase_GDSL domain-containing protein [Uniprot/SPTREMBL Acc. A0A103YNR8]	-3.58108	2.97734e-23	9.97898e-22	4.41716	0.39831
Ccrd_008667	Uncharacterized protein [Uniprot/SPTREMBL Acc. A0A103XER1]	-3.5783	9.89222e-09	8.18945e-08	3.04238	0.256052
Ccrd_022063		-3.55507	2.45938e-08	1.91319e-07	1.3394	0.110444
Ccrd_024757		-3.549	3.18492e-09	2.83057e-08	8.15671	0.720837
Ccrd_004795		-3.54088	5.92124e-11	6.49891e-10	11.2531	0.9838
Ccrd_018216	RNase III domain-containing protein [Uniprot/SPTREMBL Acc. A0A124SFJ9]	-3.52579	1.01629e-08	8.40275e-08	6.16514	0.534979
Ccrd_021482	PUM-HD domain-containing protein [Uniprot/SPTREMBL Acc. A0A103Y0I2]	-3.52549	4.49991e-32	2.66944e-30	5.15811	0.477091
Ccrd_012303	GED domain-containing protein [Uniprot/SPTREMBL Acc. A0A103YHQ1]	-3.52429	1.54805e-32	9.38486e-31	17.5286	1.61303
Ccrd_000070	Homeobox domain-containing protein [Uniprot/SPTREMBL Acc. A0A103XVT6]	-3.5139	7.60186e-23	2.48332e-21	5.66499	0.50683
Ccrd_019031	Caffeoyl-CoA O-methyltransferase [Uniprot/SPTREMBL Acc. A0A103Y543]	-3.51155	2.17288e-59	4.00203e-57	1619.7	151.151
Ccrd_011628	Laccase [Uniprot/SPTREMBL Acc. A0A103YIY2]	-3.50683	1.49661e-14	2.39396e-13	239.788	23.7297
Ccrd_020932		-3.50548	5.11626e-07	3.19275e-06	1.67676	0.142983
Ccrd_022820	FAD-binding FR-type domain-containing protein [Uniprot/SPTREMBL Acc. A0A103XXZ4]	-3.50385	1.99265e-17	4.26282e-16	2.95527	0.265045
Ccrd_015282	GTD-binding domain-containing protein [Uniprot/SPTREMBL Acc. A0A124SGH0]	-3.49632	5.78631e-06	3.00085e-05	0.348971	0.0288613
Ccrd_009173		-3.48445	7.13142e-05	0.00029755	1.45755	0.122196
Ccrd_009815	Uncharacterized protein [Uniprot/SPTREMBL Acc. A0A124SI68]	-3.46655	1.18979e-14	1.93356e-13	6.46121	0.574571
Ccrd_004308	Protein kinase domain-containing protein [Uniprot/SPTREMBL Acc. A0A124SCF7]	-3.46223	2.05823e-18	4.86602e-17	4.3746	0.40579
Ccrd_023775	Auxin-responsive protein [Uniprot/SPTREMBL Acc. A0A103XWA1]	-3.45432	4.15245e-49	5.50029e-47	23.1782	2.21243
Ccrd_021538		-3.45039	9.98814e-38	7.82027e-36	14.6041	1.38072
Ccrd_013145	AP2/ERF domain-containing protein [Uniprot/SPTREMBL Acc. A0A103YG49]	-3.44402	7.01239e-06	3.57628e-05	0.697384	0.0668879
Ccrd_010556		-3.43907	9.96401e-07	5.91267e-06	1.66449	0.146636
Ccrd_012421	Pectate lyase [Uniprot/SPTREMBL Acc. A0A103YHK6]	-3.43803	2.0149e-45	2.16479e-43	680.992	67.8964
Ccrd_006909	Uncharacterized protein [Uniprot/SPTREMBL Acc. A0A118JTV6]	-3.39903	6.15283e-23	2.01677e-21	10.1028	1.01409
Ccrd_015261	Cytochrome P450 [Uniprot/SPTREMBL Acc. A0A103YC45]	-3.39782	1.99906e-15	3.52735e-14	1.77223	0.173819
Ccrd_011645	Leucine-rich repeat-containing protein [Uniprot/SPTREMBL Acc. A0A118K600]	-3.38932	2.30444e-05	0.000106514	0.238223	0.0194531
Ccrd_014213		-3.3839	0.000230418	0.000864246	1.10708	0.118158
Ccrd_020856	S5A_REDUCTASE domain-containing protein [Uniprot/SPTREMBL Acc. A0A124SEQ3]	-3.382	6.62097e-38	5.29103e-36	511.745	53.3642
Ccrd_001613	BZIP domain-containing protein [Uniprot/SPTREMBL Acc. A0A103XSY8]	-3.37492	1.68645e-13	2.42485e-12	1.09659	0.110043
Ccrd_019299		-3.37471	1.33894e-05	6.48644e-05	2.18431	0.242334
Ccrd_010279	Glutathione S-transferase/chloride channel, C-terminal [Uniprot/SPTREMBL Acc. A0A103YLH5]	-3.37219	1.74555e-52	2.67914e-50	32.537	3.37951
Ccrd_022949		-3.36973	3.1653e-09	2.81443e-08	1.97339	0.194661
Ccrd_008621		-3.36706	5.27704e-09	4.56611e-08	2.09623	0.190958
Ccrd_003071		-3.3634	1.24801e-05	6.07485e-05	1.38631	0.155786
Ccrd_015757	HAD-like domain-containing protein [Uniprot/SPTREMBL Acc. A0A103YB84]	-3.36124	1.48643e-11	1.73902e-10	44.4876	4.42226
Ccrd_016669	Auxin response factor [Uniprot/SPTREMBL Acc. A0A118K2X9]	-3.35917	7.09586e-17	1.43693e-15	2.03823	0.206623
Ccrd_016545	Uncharacterized protein [Uniprot/SPTREMBL Acc. A0A103Y9Q2]	-3.34705	5.00646e-16	9.31856e-15	4.63494	0.467519
Ccrd_016449	Protein kinase domain-containing protein [Uniprot/SPTREMBL Acc. A0A103Y9W0]	-3.34149	1.61175e-10	1.69216e-09	0.689139	0.0624663
Ccrd_001261		-3.33547	1.07856e-19	2.83017e-18	81.8486	8.66304
Ccrd_015588	AP2/ERF domain-containing protein [Uniprot/SPTREMBL Acc. A0A103YBJ1]	-3.32751	2.14078e-20	5.93981e-19	4.45825	0.450398
Ccrd_018953	BHLH domain-containing protein [Uniprot/SPTREMBL Acc. A0A103Y580]	-3.32417	2.43507e-12	3.11866e-11	1.90399	0.19335
Ccrd_009814	Uncharacterized protein [Uniprot/SPTREMBL Acc. A0A118K759]	-3.32019	2.41517e-30	1.31569e-28	5.44495	0.581135
Ccrd_022110	Homeobox domain-containing protein [Uniprot/SPTREMBL Acc. A0A103XZA8]	-3.31585	4.58546e-34	3.03693e-32	53.2674	5.67748
Ccrd_001903	Peptidyl-prolyl cis-trans isomerase [Uniprot/SPTREMBL Acc. A0A103XSE2]	-3.30656	6.37346e-07	3.91042e-06	8.31693	0.906398
Ccrd_007316	Glycoside hydrolase, catalytic domain-containing protein [Uniprot/SPTREMBL Acc. A0A103XH84]	-3.3022	5.09512e-17	1.04713e-15	2.94749	0.316651
Ccrd_009847	Carboxypeptidase [Uniprot/SPTREMBL Acc. A0A103YM66]	-3.30211	2.00551e-19	5.15068e-18	6.28867	0.669802
Ccrd_018976	AP2/ERF domain-containing protein [Uniprot/SPTREMBL Acc. A0A103Y586]	-3.30182	6.66439e-21	1.90937e-19	158.685	17.5351
Ccrd_022682	AAA+ ATPase domain-containing protein [Uniprot/SPTREMBL Acc. A0A103XY66]	-3.2992	1.99068e-07	1.33627e-06	0.836842	0.0933158
Ccrd_000303	Abhydrolase_3 domain-containing protein [Uniprot/SPTREMBL Acc. A0A103XVC9]	-3.29814	9.09871e-23	2.93756e-21	11.374	1.195
Ccrd_014893	PHD_Oberon domain-containing protein [Uniprot/SPTREMBL Acc. A0A118K3Z0]	-3.28941	3.71906e-05	0.000164395	0.348636	0.0335985
Ccrd_004141	DNA/RNA helicase, DEAD/DEAH box type, N-terminal [Uniprot/SPTREMBL Acc. A0A103XN22]	-3.28741	2.58452e-08	2.00329e-07	0.612503	0.0615117
Ccrd_011512		-3.28713	6.71867e-08	4.89203e-07	0.492874	0.0481272
Ccrd_009639	Uncharacterized protein [Uniprot/SPTREMBL Acc. A0A103YMR8]	-3.28636	1.1501e-06	6.74608e-06	0.703881	0.0657659
Ccrd_015383	Uncharacterized protein [Uniprot/SPTREMBL Acc. A0A103YBY4]	-3.28582	1.06074e-20	3.00785e-19	583.61	66.4001
Ccrd_000094		-3.28139	4.08641e-09	3.58887e-08	3.22625	0.352407
Ccrd_020576	Photosystem II PsbX [Uniprot/SPTREMBL Acc. A0A118K0A4]	-3.27873	6.57241e-22	2.00479e-20	10.5632	1.15002
Ccrd_018232		-3.27404	5.11074e-17	1.04922e-15	5.70909	0.64555
Ccrd_001539	Xyloglucan endotransglucosylase/hydrolase [Uniprot/SPTREMBL Acc. A0A103XT53]	-3.2726	3.72006e-27	1.62765e-25	16.0132	1.7944
Ccrd_015263	Major facilitator superfamily domain, general substrate transporter [Uniprot/SPTREMBL Acc. A0A103YC68]	-3.26839	6.76727e-08	4.92236e-07	0.833389	0.0979683
Ccrd_001960	Xyloglucan endotransglucosylase/hydrolase [Uniprot/SPTREMBL Acc. A0A103XSC0]	-3.26691	8.51238e-33	5.25946e-31	145.611	16.4672
Ccrd_009198	Non-heme dioxygenase N-terminal domain-containing protein [Uniprot/SPTREMBL Acc. A0A103YNN3]	-3.2604	7.35376e-07	4.47074e-06	0.222418	0.0199713
Ccrd_003278		-3.25056	3.31661e-28	1.58762e-26	12.064	1.34428
Ccrd_013281		-3.24982	0.000109835	0.000441783	1.68704	0.207715
Ccrd_015625	Equilibrative nucleoside transporter [Uniprot/SPTREMBL Acc. A0A103YBI4]	-3.24977	1.79264e-06	1.01665e-05	0.681256	0.0827902
Ccrd_011703	Homeobox domain-containing protein [Uniprot/SPTREMBL Acc. A0A124SHL4]	-3.24384	1.69842e-17	3.66302e-16	8.6734	0.97184
Ccrd_014445		-3.23878	3.02289e-20	8.33946e-19	8.13005	0.898327
Ccrd_016592	Lipase_GDSL domain-containing protein [Uniprot/SPTREMBL Acc. A0A103Y9Q7]	-3.23352	5.2094e-09	4.51201e-08	3.20222	0.368937
Ccrd_012936		-3.23236	8.50807e-29	4.26263e-27	11.0401	1.23258
Ccrd_026897		-3.23055	8.44315e-13	1.13017e-11	12.8938	1.44791
Ccrd_006082	NAC domain-containing protein [Uniprot/SPTREMBL Acc. A0A118JUR9]	-3.22884	1.87549e-14	2.97052e-13	12.1666	1.34116
Ccrd_002641	Myb-like domain-containing protein [Uniprot/SPTREMBL Acc. A0A103XR24]	-3.22881	5.39625e-06	2.81896e-05	3.51725	0.378716
Ccrd_014777		-3.22614	3.90268e-14	5.95689e-13	1.88591	0.208503
Ccrd_017221	AAI domain-containing protein [Uniprot/SPTREMBL Acc. A0A103Y8H4]	-3.2246	7.88671e-28	3.69301e-26	837.591	93.3464
Ccrd_018671	4-coumarate--CoA ligase [Uniprot/SPTREMBL Acc. A0A103Y5S5]	-3.2111	1.44601e-09	1.34251e-08	2.5212	0.296786
Ccrd_023668	Serine C-palmitoyltransferase [Uniprot/SPTREMBL Acc. A0A118JY53]	-3.20972	6.93621e-13	9.34119e-12	1.99904	0.210255
Ccrd_005623	Beta-galactosidase [Uniprot/SPTREMBL Acc. A0A103XKB3]	-3.20396	5.40289e-30	2.88637e-28	29.317	3.45953
Ccrd_010504	AB hydrolase-1 domain-containing protein [Uniprot/SPTREMBL Acc. A0A124SHZ4]	-3.20003	1.2445e-17	2.73493e-16	8.0842	0.905817
Ccrd_010158		-3.19244	1.2301e-13	1.79403e-12	3.47604	0.421115
Ccrd_020420	SPX domain-containing protein [Uniprot/SPTREMBL Acc. A0A103Y2E5]	-3.19102	3.61956e-07	2.32245e-06	8.23347	0.92719
Ccrd_023681	Uncharacterized protein [Uniprot/SPTREMBL Acc. A0A103XWB5]	-3.18567	1.3818e-13	2.00621e-12	4.71491	0.523703
Ccrd_008448	Dof-type domain-containing protein [Uniprot/SPTREMBL Acc. A0A118JTE2]	-3.18497	2.47059e-24	8.91395e-23	12.9341	1.52376
Ccrd_011229		-3.17747	1.33288e-43	1.33316e-41	22.3696	2.60166
Ccrd_010177	Mannose-binding lectin [Uniprot/SPTREMBL Acc. A0A124SI32]	-3.16581	5.18266e-26	2.1012e-24	28.7476	3.38533
Ccrd_018235	Uncharacterized protein [Uniprot/SPTREMBL Acc. A0A118K1X8]	-3.16436	5.94432e-13	8.04459e-12	1.70668	0.201338
Ccrd_021264	Protein kinase-like domain-containing protein [Uniprot/SPTREMBL Acc. A0A103Y0W1]	-3.16292	1.24198e-15	2.22808e-14	1.78098	0.207226
Ccrd_022551	PSI-G [Uniprot/SPTREMBL Acc. A0A103XYG6]	-3.16149	8.4798e-08	6.085e-07	2.83477	0.333114
Ccrd_019261	CCT domain-containing protein [Uniprot/SPTREMBL Acc. A0A103Y4R0]	-3.15882	4.39251e-11	4.89043e-10	2.48904	0.292326
Ccrd_011505	BHLH domain-containing protein [Uniprot/SPTREMBL Acc. A0A103YJA5]	-3.14745	1.37916e-07	9.50517e-07	0.713896	0.0874196
Ccrd_003035	CRAL-TRIO domain-containing protein [Uniprot/SPTREMBL Acc. A0A103XQG0]	-3.13867	1.39623e-39	1.17941e-37	446.881	54.8282
Ccrd_018428	PHD-type domain-containing protein [Uniprot/SPTREMBL Acc. A0A103Y676]	-3.13293	2.01866e-70	5.57697e-68	75.6939	9.20734
Ccrd_015353		-3.12863	1.13308e-28	5.61864e-27	7.63424	0.911605
Ccrd_020263	Protein kinase domain-containing protein [Uniprot/SPTREMBL Acc. A0A103Y2T9]	-3.128	5.34205e-14	8.02096e-13	2.967	0.340766
Ccrd_005091	Calcium-binding EF-hand [Uniprot/SPTREMBL Acc. A0A103XL62]	-3.12169	2.50443e-06	1.38301e-05	2.22791	0.289938
Ccrd_012897	Dirigent protein [Uniprot/SPTREMBL Acc. A0A103YGP2]	-3.12146	1.23298e-67	3.09669e-65	116.834	14.3128
Ccrd_014459	Cytochrome P450 [Uniprot/SPTREMBL Acc. A0A103YDN9]	-3.11501	1.05948e-28	5.26719e-27	26.1891	3.17567
Ccrd_000615	Alpha/beta hydrolase fold-3 [Uniprot/SPTREMBL Acc. A0A118JXN5]	-3.11164	1.81276e-47	2.16401e-45	34.451	4.29012
Ccrd_004165	Peroxidase [Uniprot/SPTREMBL Acc. A0A103XN65]	-3.11028	8.77609e-28	4.07983e-26	223.311	28.0662
Ccrd_025835	Calmodulin binding protein-like protein [Uniprot/SPTREMBL Acc. A0A103U5R7]	-3.10864	7.76443e-30	4.12517e-28	34.2137	4.22753
Ccrd_009276	NPH3 domain-containing protein [Uniprot/SPTREMBL Acc. A0A103YNH9]	-3.10535	2.93598e-28	1.41241e-26	20.0467	2.49172
Ccrd_018119	PAC motif-containing protein [Uniprot/SPTREMBL Acc. A0A103Y6S2]	-3.09952	3.14513e-07	2.03784e-06	0.436672	0.0480145
Ccrd_020216	Uncharacterized protein [Uniprot/SPTREMBL Acc. A0A103Y2W1]	-3.08897	1.53848e-17	3.343e-16	6.88707	0.86169
Ccrd_020858	PKS_KS domain-containing protein [Uniprot/SPTREMBL Acc. A0A103Y1P3]	-3.0813	2.31401e-17	4.91765e-16	4.33617	0.537366
Ccrd_021870	Glycoside hydrolase, catalytic domain-containing protein [Uniprot/SPTREMBL Acc. A0A124SEE8]	-3.07733	8.30329e-07	5.00085e-06	1.62144	0.194328
Ccrd_006768		-3.06048	1.15807e-20	3.27905e-19	12.399	1.55802
Ccrd_012507	ZF-HD dimerization-type domain-containing protein [Uniprot/SPTREMBL Acc. A0A103YHD7]	-3.05954	4.02712e-05	0.00017684	3.29699	0.408596
Ccrd_014365		-3.05921	7.15162e-24	2.49648e-22	7.35487	0.922206
Ccrd_007094	Uncharacterized protein [Uniprot/SPTREMBL Acc. A0A124SBJ9]	-3.05762	1.58845e-24	5.79606e-23	4509.05	592.759
Ccrd_015123	Thioredoxin domain-containing protein [Uniprot/SPTREMBL Acc. A0A118K3U1]	-3.05565	3.05818e-25	1.16882e-23	56.6806	7.34311
Ccrd_021527	Uncharacterized protein [Uniprot/SPTREMBL Acc. A0A103Y0E0]	-3.04429	1.01526e-28	5.06036e-27	36.2088	4.67137
Ccrd_010377	Uncharacterized protein [Uniprot/SPTREMBL Acc. A0A103YLE2]	-3.04395	8.96876e-20	2.37924e-18	4.51807	0.571943
Ccrd_004867		-3.04209	4.82757e-16	8.99425e-15	7.60705	1.00977
Ccrd_012827	Putative S-adenosyl-L-methionine-dependent methyltransferase [Uniprot/SPTREMBL Acc. A0A103YGR2]	-3.04179	5.36392e-08	3.98054e-07	0.496475	0.0566302
Ccrd_007757	Uncharacterized protein [Uniprot/SPTREMBL Acc. A0A103XGF4]	-3.0229	7.65441e-38	6.09171e-36	525.037	70.1189
Ccrd_009405	NADH-cytochrome b5 reductase [Uniprot/SPTREMBL Acc. A0A124SIB3]	-3.02226	9.37975e-38	7.40387e-36	33.6421	4.43432
Ccrd_006829		-3.01958	7.59053e-18	1.70889e-16	10.537	1.33741
Ccrd_007081	Leucine-rich repeat-containing protein [Uniprot/SPTREMBL Acc. A0A118JUF9]	-3.01384	1.69574e-15	3.00861e-14	1.22389	0.160064
Ccrd_006159		-3.01039	2.66632e-19	6.76691e-18	5.54119	0.741286
Ccrd_002553	Aminotran_1_2 domain-containing protein [Uniprot/SPTREMBL Acc. A0A103XRA9]	-3.00525	1.06835e-22	3.43202e-21	6.23768	0.828414
Ccrd_001770	TCP domain-containing protein [Uniprot/SPTREMBL Acc. A0A118JWU9]	-2.98335	5.99041e-07	3.68827e-06	1.01013	0.125876
Ccrd_021823		-2.97524	1.22457e-10	1.30121e-09	1.90629	0.241425
Ccrd_026354		-2.96234	1.4916e-25	5.79239e-24	45.6095	6.25416
Ccrd_011296		-2.96051	5.17164e-06	2.71189e-05	4.21498	0.597085
Ccrd_000654		-2.953	3.57276e-11	4.00311e-10	11.9192	1.65942
Ccrd_026214	ANK_REP_REGION domain-containing protein [Uniprot/SPTREMBL Acc. A0A103XDE1]	-2.94789	2.15433e-05	0.000100344	0.616852	0.0846938
Ccrd_015537		-2.94714	1.36633e-14	2.20195e-13	4.56501	0.651731
Ccrd_020339		-2.94248	4.3794e-13	5.98539e-12	2.92224	0.407229
Ccrd_010052	Protein DETOXIFICATION [Uniprot/SPTREMBL Acc. A0A124SI45]	-2.9371	1.13686e-13	1.66306e-12	5.01378	0.697396
Ccrd_015976	Cytochrome P450 [Uniprot/SPTREMBL Acc. A0A103YAV3]	-2.92729	1.23497e-06	7.18287e-06	0.590602	0.0789692
Ccrd_011991		-2.92012	2.2888e-38	1.86764e-36	191.392	27.4176
Ccrd_017864		-2.91779	2.28594e-13	3.23867e-12	20.4878	2.76876
Ccrd_002959		-2.91731	0.000486132	0.00168543	0.60425	0.0938909
Ccrd_012301		-2.91071	2.18205e-13	3.09829e-12	5.18731	0.74451
Ccrd_005264		-2.9063	1.15601e-13	1.68725e-12	42.4557	6.11087
Ccrd_006103	Initiation factor 2B-related protein [Uniprot/SPTREMBL Acc. A0A118JUP7]	-2.90008	4.99261e-35	3.41173e-33	37.6483	5.36303
Ccrd_009075	Endoglucanase [Uniprot/SPTREMBL Acc. A0A103YNV5]	-2.89429	4.45856e-05	0.000194111	0.475514	0.0643218
Ccrd_010711	Inorganic diphosphatase [Uniprot/SPTREMBL Acc. A0A118K6L9]	-2.88981	2.04047e-25	7.89212e-24	10.1198	1.46593
Ccrd_014404	WRKY domain-containing protein [Uniprot/SPTREMBL Acc. A0A103YDQ2]	-2.88622	3.43828e-26	1.41474e-24	25.8217	3.662
Ccrd_015221	BHLH domain-containing protein [Uniprot/SPTREMBL Acc. A0A118K3T6]	-2.88509	7.10532e-06	3.61891e-05	0.88164	0.111044
Ccrd_011604	Xanthine/uracil/vitamin C permease [Uniprot/SPTREMBL Acc. A0A103YJ36]	-2.8841	7.16216e-05	0.000298768	0.630437	0.0893591
Ccrd_020503	PPM-type phosphatase domain-containing protein [Uniprot/SPTREMBL Acc. A0A103Y2B9]	-2.87987	0.000140656	0.000553099	2.17318	0.308467
Ccrd_025643	Cytochrome P450 [Uniprot/SPTREMBL Acc. A0A103VZI8]; p-coumaroyl ester 3'-hydroxylase [Uniprot/SPTREMBL Acc. A0A1L7B5N9]; p-coumaroyl ester 3'-hydroxylase [Uniprot/SPTREMBL Acc. D6BL34]	-2.87806	2.13111e-30	1.16422e-28	186.29	27.0899
Ccrd_014318		-2.86696	1.52371e-09	1.41058e-08	0.75137	0.107356
Ccrd_022870	Calmodulin binding protein-like protein [Uniprot/SPTREMBL Acc. A0A103XXS8]	-2.85927	3.26672e-41	2.9521e-39	73.4342	10.7951
Ccrd_014586		-2.85875	9.00485e-06	4.4987e-05	10.5784	1.48031
Ccrd_009359		-2.85694	1.50215e-16	2.93436e-15	18.9596	2.78707
Ccrd_010183	Jacalin-type lectin domain-containing protein [Uniprot/SPTREMBL Acc. A0A103YLP1]	-2.85444	7.50538e-14	1.11119e-12	1.73216	0.250702
Ccrd_020408	Phytocyanin domain-containing protein [Uniprot/SPTREMBL Acc. A0A103Y2I0]	-2.85289	1.32167e-25	5.18454e-24	32.3196	4.86729
Ccrd_019530	Na_Ca_ex domain-containing protein [Uniprot/SPTREMBL Acc. A0A103Y497]	-2.84463	4.23219e-20	1.14792e-18	41.2863	6.0483
Ccrd_007181	Leucine-rich repeat-containing protein [Uniprot/SPTREMBL Acc. A0A124SBI9]	-2.83053	3.97389e-06	2.12178e-05	0.135663	0.0188401
Ccrd_001689	Uncharacterized protein [Uniprot/SPTREMBL Acc. A0A118JXE7]	-2.82313	7.82533e-63	1.70038e-60	68.1042	10.3127
Ccrd_026639	Lipoxygenase [Uniprot/SPTREMBL Acc. A0A103M5U0]	-2.82111	3.6249e-26	1.48521e-24	21.6099	3.2557
Ccrd_012811	Mannan endo-1,4-beta-mannosidase [Uniprot/SPTREMBL Acc. A0A103YGS6]	-2.8153	6.32902e-14	9.44421e-13	3.20296	0.48962
Ccrd_022220	Extensin repeat-containing protein [Uniprot/SPTREMBL Acc. A0A103XZ36]	-2.81166	5.16307e-14	7.76428e-13	95.5622	15.085
Ccrd_016347	Leucine-rich repeat-containing protein [Uniprot/SPTREMBL Acc. A0A124SG55]	-2.80185	0.00170506	0.00513695	0.305836	0.0412589
Ccrd_009101		-2.79949	0.000431206	0.00151592	1.40166	0.228469
Ccrd_003928		-2.79939	1.63093e-28	7.98496e-27	20.3746	3.12889
Ccrd_015714	Homeodomain-containing protein [Uniprot/SPTREMBL Acc. A0A103YBA4]	-2.79838	2.4335e-45	2.60008e-43	48.7012	7.41802
Ccrd_000926		-2.79679	8.81602e-19	2.16087e-17	12.9251	1.94216
Ccrd_016565	3-oxo-5-alpha-steroid 4-dehydrogenase, C-terminal [Uniprot/SPTREMBL Acc. A0A103Y9N2]	-2.79204	2.82966e-07	1.84874e-06	0.750007	0.107964
Ccrd_025871	Pentatricopeptide repeat-containing protein [Uniprot/SPTREMBL Acc. A0A103TWN9]	-2.79085	1.33737e-43	1.33316e-41	50.6471	7.74432
Ccrd_010670	Alpha/beta hydrolase fold-1 [Uniprot/SPTREMBL Acc. A0A103YKT8]	-2.78809	3.58299e-09	3.16833e-08	3.16393	0.474518
Ccrd_010818	Cyclin-dependent kinase inhibitor [Uniprot/SPTREMBL Acc. A0A103YKD7]	-2.78652	1.03732e-21	3.11988e-20	8.2851	1.25995
Ccrd_015998	Pectate lyase [Uniprot/SPTREMBL Acc. A0A103YAR5]	-2.78136	1.09974e-40	9.71133e-39	37.4559	5.82969
Ccrd_014737	ABC transporter domain-containing protein [Uniprot/SPTREMBL Acc. A0A103YD59]	-2.77889	2.36672e-24	8.55513e-23	5.57079	0.858392
Ccrd_017557	Auxin responsive SAUR protein [Uniprot/SPTREMBL Acc. A0A103Y7V0]	-2.77473	6.26131e-11	6.85271e-10	12.78	2.05266
Ccrd_000997		-2.77061	4.24185e-12	5.30524e-11	0.988769	0.148798
Ccrd_011800		-2.76701	3.40161e-23	1.13616e-21	11.6555	1.81107
Ccrd_010151	Myb-like domain-containing protein [Uniprot/SPTREMBL Acc. A0A103YLU9]	-2.76619	1.4866e-07	1.01912e-06	16.7461	2.62765
Ccrd_003168	Heat shock protein DnaJ, cysteine-rich domain-containing protein [Uniprot/SPTREMBL Acc. A0A118JW34]	-2.75998	0.00138353	0.00426937	1.67481	0.279933
Ccrd_009378		-2.75931	1.53593e-45	1.65941e-43	151.521	24.1672
Ccrd_010467		-2.75682	0.000188183	0.000720504	1.63714	0.2538
Ccrd_012816	Adenosinetriphosphatase [Uniprot/SPTREMBL Acc. A0A118K5A6]	-2.75564	1.11331e-26	4.76336e-25	13.6093	2.1163
Ccrd_023710	WRKY domain-containing protein [Uniprot/SPTREMBL Acc. A0A118JYP2]	-2.75362	1.18253e-39	1.00744e-37	84.9624	13.6166
Ccrd_011228		-2.75302	1.00487e-24	3.72283e-23	9.39131	1.50899
Ccrd_023782	Uncharacterized protein [Uniprot/SPTREMBL Acc. A0A103XW83]	-2.75295	4.20292e-10	4.18109e-09	9.0252	1.40625
Ccrd_003134	Chlorophyll a-b binding protein, chloroplastic [Uniprot/SPTREMBL Acc. A0A103XQ62]	-2.75286	7.74726e-14	1.1437e-12	2.91463	0.453074
Ccrd_018425	J domain-containing protein [Uniprot/SPTREMBL Acc. A0A103Y679]	-2.74571	3.61639e-59	6.5362e-57	120.825	19.2739
Ccrd_000808	Auxin responsive SAUR protein [Uniprot/SPTREMBL Acc. A0A124SDI8]	-2.74568	3.11204e-18	7.25979e-17	335.589	55.1873
Ccrd_011976	RING-type domain-containing protein [Uniprot/SPTREMBL Acc. A0A103YIB6]	-2.74436	3.60167e-10	3.62775e-09	25.1345	3.9683
Ccrd_006202	Dof-type domain-containing protein [Uniprot/SPTREMBL Acc. A0A103XJE4]	-2.74258	3.17927e-06	1.71966e-05	3.2814	0.507874
Ccrd_023749	SHSP domain-containing protein [Uniprot/SPTREMBL Acc. A0A124SDU1]	-2.74042	8.13117e-32	4.75071e-30	44.0759	7.03092
Ccrd_014396	Cupredoxin [Uniprot/SPTREMBL Acc. A0A103YDS0]	-2.73744	4.92486e-23	1.61701e-21	25.8058	4.0532
Ccrd_005955	Uncharacterized protein [Uniprot/SPTREMBL Acc. A0A103XJN7]	-2.73432	2.5305e-08	1.96694e-07	1.43172	0.213943
Ccrd_023495		-2.73243	7.70688e-06	3.90575e-05	1.13456	0.167843
Ccrd_015568	AP2/ERF domain-containing protein [Uniprot/SPTREMBL Acc. A0A118K3K3]	-2.73168	5.64576e-07	3.49163e-06	1.21655	0.195045
Ccrd_017665	Barwin-like endoglucanase [Uniprot/SPTREMBL Acc. A0A103Y7N5]	-2.7282	2.05512e-27	9.17873e-26	1445.26	233.907
Ccrd_007573		-2.72703	2.57979e-05	0.000118028	1.87776	0.30473
Ccrd_019291	Exocyst subunit Exo70 family protein [Uniprot/SPTREMBL Acc. A0A103Y4L3]	-2.72587	3.09661e-20	8.51854e-19	3.39904	0.553773
Ccrd_017595		-2.72292	0.00345773	0.00956092	0.985511	0.158114
Ccrd_000280		-2.71902	2.40079e-25	9.24877e-24	33.3945	5.4442
Ccrd_014020		-2.71755	0.000132474	0.000524982	1.78441	0.294535
Ccrd_020405	Auxin-responsive protein [Uniprot/SPTREMBL Acc. A0A103Y2J9]	-2.71075	2.23844e-08	1.74764e-07	3.25312	0.533554
Ccrd_013936	Catalase [Uniprot/SPTREMBL Acc. A0A118K4K6]	-2.70844	3.9771e-19	1.00147e-17	914.059	152.97
Ccrd_018175	Homeobox domain-containing protein [Uniprot/SPTREMBL Acc. A0A118K1W8]	-2.70067	1.04729e-06	6.17865e-06	4.53231	0.737576
Ccrd_018677	Auxin-responsive protein [Uniprot/SPTREMBL Acc. A0A118K1K7]	-2.69968	6.05254e-19	1.50064e-17	4.22109	0.68222
Ccrd_010724		-2.69855	1.516e-09	1.40479e-08	13.6512	2.15541
Ccrd_017646	Protein kinase domain-containing protein [Uniprot/SPTREMBL Acc. A0A124SFR1]	-2.6966	7.37665e-10	7.10797e-09	4.59161	0.756077
Ccrd_023192	Ribosomal_L18e/L15P domain-containing protein [Uniprot/SPTREMBL Acc. A0A103XX78]	-2.69609	6.79487e-09	5.75837e-08	8.72529	1.41415
Ccrd_009486		-2.68976	1.42718e-39	1.20001e-37	1091.56	181.041
Ccrd_023309	Dirigent protein [Uniprot/SPTREMBL Acc. A0A118JZC6]	-2.68691	1.31073e-07	9.09514e-07	3.38948	0.570127
Ccrd_005551	BHLH domain-containing protein [Uniprot/SPTREMBL Acc. A0A103XKL3]	-2.68674	6.45335e-16	1.18858e-14	2.52164	0.407855
Ccrd_022798	Pectate lyase [Uniprot/SPTREMBL Acc. A0A103XY16]	-2.68081	4.17025e-10	4.15286e-09	226.038	39.3569
Ccrd_003290	HTH myb-type domain-containing protein [Uniprot/SPTREMBL Acc. A0A118JWU0]	-2.67581	0.0029464	0.00829892	0.176999	0.0236558
Ccrd_023454	Peptidase S8/S53 domain-containing protein [Uniprot/SPTREMBL Acc. A0A103XWV5]	-2.67432	1.65726e-06	9.45976e-06	2.68062	0.434484
Ccrd_018142		-2.67299	9.77865e-19	2.38766e-17	38.9969	6.64032
Ccrd_013147	Argonaute/Dicer protein, PAZ [Uniprot/SPTREMBL Acc. A0A103YG69]	-2.67013	1.65367e-07	1.12251e-06	0.56158	0.0915868
Ccrd_000695		-2.66572	8.49344e-23	2.75134e-21	17.5364	2.9018
Ccrd_012904	Mitochondrial carrier domain-containing protein [Uniprot/SPTREMBL Acc. A0A103YGN3]	-2.66236	2.31917e-22	7.27926e-21	8.57006	1.44544
Ccrd_018269	Auxin efflux carrier component [Uniprot/SPTREMBL Acc. A0A103Y6J1]	-2.66127	1.03374e-31	6.02152e-30	7.67206	1.30564
Ccrd_016439	Cytochrome P450 [Uniprot/SPTREMBL Acc. A0A103YA09]	-2.65778	2.26225e-40	1.98862e-38	15.1637	2.54151
Ccrd_022854	Uncharacterized protein [Uniprot/SPTREMBL Acc. A0A103XY48]	-2.65762	3.03468e-13	4.23738e-12	4.51405	0.74362
Ccrd_004549	Glycosyltransferase AER61, uncharacterized [Uniprot/SPTREMBL Acc. A0A118JVQ2]	-2.65479	3.19344e-25	1.21571e-23	12.7932	2.19244
Ccrd_009844	Cytochrome P450 [Uniprot/SPTREMBL Acc. A0A103YMI2]	-2.65177	7.79349e-10	7.48407e-09	0.738328	0.122498
Ccrd_013280		-2.64867	3.40119e-09	3.01309e-08	12.0034	2.05354
Ccrd_019341	GRAS domain-containing protein [Uniprot/SPTREMBL Acc. A0A103Y4J4]	-2.64819	7.63863e-07	4.63374e-06	0.798856	0.128237
Ccrd_007772		-2.64649	7.51285e-16	1.37066e-14	2.74058	0.456362
Ccrd_013747	Uncharacterized protein [Uniprot/SPTREMBL Acc. A0A103YF03]	-2.63944	0.000265399	0.000981931	0.360948	0.062236
Ccrd_008674	Dil domain-containing protein [Uniprot/SPTREMBL Acc. A0A103XEM6]	-2.63701	2.60387e-06	1.43244e-05	0.193612	0.0322815
Ccrd_005007	Cytochrome P450 [Uniprot/SPTREMBL Acc. A0A103XLN1]	-2.63608	5.04652e-19	1.25766e-17	23.1496	3.90746
Ccrd_005396	Dof-type domain-containing protein [Uniprot/SPTREMBL Acc. A0A124SC39]	-2.63358	6.39738e-11	6.99767e-10	26.0601	4.57742
Ccrd_018233	FAD-binding PCMH-type domain-containing protein [Uniprot/SPTREMBL Acc. A0A118K1Y7]	-2.63239	1.87612e-49	2.57322e-47	51.3407	8.83921
Ccrd_006885	WRKY domain-containing protein [Uniprot/SPTREMBL Acc. A0A118JUI7]	-2.63127	1.03202e-18	2.50416e-17	26.4765	4.50531
Ccrd_020042	Uncharacterized protein [Uniprot/SPTREMBL Acc. A0A103Y359]	-2.63114	5.17605e-14	7.77775e-13	12.4914	2.18324
Ccrd_018174	NAC domain-containing protein [Uniprot/SPTREMBL Acc. A0A103Y6Q8]	-2.62547	3.19844e-05	0.000143381	5.32069	0.928211
Ccrd_019107	MADS-box domain-containing protein [Uniprot/SPTREMBL Acc. A0A103Y4Z6]	-2.6244	4.82959e-08	3.61173e-07	39.5551	6.8431
Ccrd_001840	Bet_v_1 domain-containing protein [Uniprot/SPTREMBL Acc. A0A103XSG9]	-2.61933	4.62784e-19	1.1563e-17	34.4359	6.00495
Ccrd_006757	AAI domain-containing protein [Uniprot/SPTREMBL Acc. A0A118JUA6]	-2.61291	0.000184764	0.000708679	3.49108	0.567466
Ccrd_023617	Protein kinase domain-containing protein [Uniprot/SPTREMBL Acc. A0A103XWG7]	-2.6073	1.52957e-07	1.04561e-06	1.01202	0.171866
Ccrd_005354	Protein kinase domain-containing protein [Uniprot/SPTREMBL Acc. A0A124SC41]	-2.60641	2.97877e-10	3.03671e-09	1.28449	0.212492
Ccrd_010576	Uncharacterized protein [Uniprot/SPTREMBL Acc. A0A103YL36]	-2.60525	1.32218e-51	1.95188e-49	30.048	5.27506
Ccrd_017162	Protein kinase domain-containing protein [Uniprot/SPTREMBL Acc. A0A103Y8L1]	-2.60397	6.92209e-14	1.02816e-12	2.1386	0.363298
Ccrd_003675	C2 calcium-dependent membrane targeting [Uniprot/SPTREMBL Acc. A0A103XP20]	-2.59961	5.33474e-12	6.57125e-11	1.20909	0.21441
Ccrd_023227		-2.59934	1.06053e-27	4.87163e-26	155.966	27.9621
Ccrd_023233	PEROXIDASE_4 domain-containing protein [Uniprot/SPTREMBL Acc. A0A118JYX4]	-2.59664	6.80183e-11	7.41909e-10	2.63328	0.464624
Ccrd_022804	Aa_trans domain-containing protein [Uniprot/SPTREMBL Acc. A0A118JYS1]	-2.59586	1.54618e-11	1.80347e-10	1.00746	0.17349
Ccrd_016629	Malate dehydrogenase [Uniprot/SPTREMBL Acc. A0A118K2W1]	-2.58979	7.38648e-05	0.00030733	0.810419	0.12916
Ccrd_004985	Aquaporin-like protein [Uniprot/SPTREMBL Acc. A0A124SC78]	-2.58334	2.35741e-33	1.50462e-31	1814.02	328.636
Ccrd_023765	Alpha/beta hydrolase, N-terminal [Uniprot/SPTREMBL Acc. A0A103XW73]	-2.58175	1.44815e-19	3.77437e-18	233.605	41.4054
Ccrd_004370	Phytocyanin domain-containing protein [Uniprot/SPTREMBL Acc. A0A103XMR8]	-2.57989	0.000172263	0.000664417	0.792418	0.116795
Ccrd_014801	F-box domain, cyclin-like protein [Uniprot/SPTREMBL Acc. A0A118K421]	-2.57913	3.32467e-16	6.3097e-15	4.64224	0.826534
Ccrd_003638	11-S seed storage protein, conserved site-containing protein [Uniprot/SPTREMBL Acc. A0A103XP53]	-2.57858	1.30726e-08	1.06e-07	1.58575	0.288754
Ccrd_018997		-2.57781	2.51438e-09	2.25956e-08	26.1033	4.79744
Ccrd_008418		-2.5751	4.84066e-10	4.7689e-09	11.7513	2.1566
Ccrd_002054	BHLH domain-containing protein [Uniprot/SPTREMBL Acc. A0A103XS34]	-2.57365	1.5814e-05	7.56062e-05	3.24347	0.552141
Ccrd_019301	Uncharacterized protein [Uniprot/SPTREMBL Acc. A0A118K162]	-2.57179	4.73522e-20	1.27719e-18	29.1877	5.26907
Ccrd_018952		-2.57086	1.9086e-24	6.92505e-23	69.2585	12.504
Ccrd_003763		-2.57018	0.00251974	0.00723954	0.580948	0.101954
Ccrd_009921		-2.56628	6.22893e-22	1.90302e-20	5.83628	1.03357
Ccrd_012993	PKS_ER domain-containing protein [Uniprot/SPTREMBL Acc. A0A103YGH5]	-2.56237	5.71267e-21	1.65138e-19	161.688	30.0121
Ccrd_015991		-2.55903	5.61124e-19	1.39481e-17	27.1962	4.99514
Ccrd_010165	Cytochrome P450 [Uniprot/SPTREMBL Acc. A0A103YLT9]	-2.55059	1.22044e-30	6.74348e-29	848.227	153.907
Ccrd_004878	WRKY domain-containing protein [Uniprot/SPTREMBL Acc. A0A103XLR4]	-2.54067	5.94086e-41	5.31899e-39	36.6111	6.71044
Ccrd_026588	Auxin-responsive protein [Uniprot/SPTREMBL Acc. A0A118JS31]	-2.5362	4.392e-06	2.33023e-05	24.3344	4.41193
Ccrd_009515		-2.52918	1.99884e-19	5.14036e-18	25.2318	4.61014
Ccrd_018430	Uncharacterized protein [Uniprot/SPTREMBL Acc. A0A118K1T1]	-2.5248	2.92845e-38	2.36959e-36	172.787	31.9022
Ccrd_020267	Protein kinase domain-containing protein [Uniprot/SPTREMBL Acc. A0A103Y2R8]	-2.52365	8.25807e-34	5.41366e-32	5.20146	0.962266
Ccrd_011073		-2.52218	1.63389e-37	1.25888e-35	174.217	32.6369
Ccrd_013189	Calcium-binding EF-hand [Uniprot/SPTREMBL Acc. A0A118K527]	-2.51958	2.73175e-10	2.79224e-09	4.91097	0.913794
Ccrd_002999	Anaphase-promoting complex subunit 1 [Uniprot/SPTREMBL Acc. A0A103XQB1]	-2.51759	5.38137e-07	3.34201e-06	2.75941	0.496156
Ccrd_006983	Peptidase A1 domain-containing protein [Uniprot/SPTREMBL Acc. A0A103XHS2]	-2.51704	3.46503e-09	3.06683e-08	4.11332	0.769187
Ccrd_000340	LRRNT_2 domain-containing protein [Uniprot/SPTREMBL Acc. A0A118JYC0]	-2.51213	6.09634e-21	1.75704e-19	17.3892	3.25216
Ccrd_001636	Glycosyl transferase, family 14 [Uniprot/SPTREMBL Acc. A0A103XSW5]	-2.50664	2.439e-05	0.000112171	1.02895	0.202485
Ccrd_012312	Carboxypeptidase [Uniprot/SPTREMBL Acc. A0A118K5L8]	-2.49532	3.16909e-15	5.46717e-14	4.39525	0.810972
Ccrd_005622	rRNA adenine N(6)-methyltransferase [Uniprot/SPTREMBL Acc. A0A103XKB7]	-2.49333	2.90946e-23	9.76841e-22	15.7455	2.9413
Ccrd_012732		-2.4893	3.65364e-25	1.38274e-23	284.009	54.2827
Ccrd_007692	Poly(A)-specific ribonuclease [Uniprot/SPTREMBL Acc. A0A103XGI3]	-2.48673	3.76579e-17	7.83081e-16	5.68547	1.05737
Ccrd_017597	Dirigent protein [Uniprot/SPTREMBL Acc. A0A103Y7S7]	-2.48234	1.4768e-06	8.48987e-06	2.57777	0.487805
Ccrd_002861	Ndr [Uniprot/SPTREMBL Acc. A0A118JW91]	-2.47753	7.35638e-07	4.47093e-06	1.17117	0.218986
Ccrd_005253	NAC domain-containing protein [Uniprot/SPTREMBL Acc. A0A124SC50]	-2.47664	3.60781e-07	2.31568e-06	1.56437	0.286345
Ccrd_005749	Aldolase-type TIM barrel [Uniprot/SPTREMBL Acc. A0A118JUA0]	-2.47623	5.61277e-32	3.29925e-30	59.0324	11.2411
Ccrd_004625		-2.47603	4.57736e-37	3.4851e-35	172.872	33.1051
Ccrd_007112	Glucan endo-1,3-beta-D-glucosidase [Uniprot/SPTREMBL Acc. A0A103XHL4]	-2.46326	4.44797e-27	1.92868e-25	51.3768	10.1008
Ccrd_005644		-2.46074	3.23843e-06	1.74695e-05	2.94213	0.543246
Ccrd_016062		-2.45833	2.02949e-09	1.84785e-08	7.99045	1.54971
Ccrd_003083		-2.45582	1.90164e-42	1.82965e-40	141.411	27.5249
Ccrd_016479	PRONE domain-containing protein [Uniprot/SPTREMBL Acc. A0A118K2Z8]	-2.45076	1.10612e-09	1.04347e-08	2.18783	0.413104
Ccrd_011557	WRKY domain-containing protein [Uniprot/SPTREMBL Acc. A0A103YJ24]	-2.45051	9.01189e-12	1.08115e-10	25.7854	4.96239
Ccrd_019721	Uncharacterized protein [Uniprot/SPTREMBL Acc. A0A124SF33]	-2.44719	4.17394e-23	1.38694e-21	19.1424	3.78711
Ccrd_010780		-2.4447	2.25316e-11	2.58292e-10	2.99499	0.595596
Ccrd_009596		-2.44283	0.0114734	0.0272486	1.3155	0.250416
Ccrd_011992	Germin-like protein [Uniprot/SPTREMBL Acc. A0A124SHI2]	-2.44159	0.000664475	0.00223134	1.55611	0.302478
Ccrd_005335	Transcription factor, K-box [Uniprot/SPTREMBL Acc. A0A103XKV5]	-2.43729	1.36159e-14	2.19615e-13	52.8732	10.3342
Ccrd_025866	Terpene cyclase/mutase family member [Uniprot/SPTREMBL Acc. A0A103XDN1]	-2.43709	3.4133e-11	3.82665e-10	27.8428	5.53406
Ccrd_025774	Receptor-like serine/threonine-protein kinase [Uniprot/SPTREMBL Acc. A0A118JSJ8]	-2.43262	7.40837e-08	5.36192e-07	0.719557	0.136062
Ccrd_017437		-2.42816	5.21106e-05	0.000224048	0.562088	0.105553
Ccrd_018897		-2.41656	1.3691e-12	1.79871e-11	4.43454	0.881193
Ccrd_012614	BHLH domain-containing protein [Uniprot/SPTREMBL Acc. A0A103YH57]	-2.41635	3.76571e-11	4.20711e-10	4.2162	0.86249
Ccrd_026396	Uncharacterized protein [Uniprot/SPTREMBL Acc. A0A103QDC8]	-2.41499	0.000133522	0.000528485	2.04683	0.403433
Ccrd_003304	Expansin [Uniprot/SPTREMBL Acc. A0A118JWP4]	-2.41473	6.56535e-16	1.20806e-14	1050.04	215.137
Ccrd_007114	Fe2OG dioxygenase domain-containing protein [Uniprot/SPTREMBL Acc. A0A103XHM4]	-2.4127	2.02261e-28	9.85272e-27	33.1586	6.59811
Ccrd_003586	Calcium-transporting ATPase [Uniprot/SPTREMBL Acc. A0A103XP98]	-2.41091	0.000172596	0.000665437	0.276933	0.0506115
Ccrd_012661	Exostosin domain-containing protein [Uniprot/SPTREMBL Acc. A0A103YH11]	-2.40964	4.50159e-05	0.000195808	0.908135	0.180833
Ccrd_021886	PNP_UDP_1 domain-containing protein [Uniprot/SPTREMBL Acc. A0A103XZS5]	-2.40949	0.0035763	0.00984653	0.45508	0.0928154
Ccrd_005762	Patatin [Uniprot/SPTREMBL Acc. A0A124SBZ4]	-2.40109	3.15508e-12	3.98537e-11	5.06386	1.01786
Ccrd_017817		-2.39689	3.8973e-09	3.43215e-08	9.70192	1.93682
Ccrd_021500	Dirigent protein [Uniprot/SPTREMBL Acc. A0A124SEJ6]	-2.39476	5.22142e-22	1.60791e-20	1976.03	409.06
Ccrd_014103	AT-hook motif nuclear-localized protein [Uniprot/SPTREMBL Acc. A0A124SGV4]	-2.39455	5.16462e-12	6.37794e-11	99.7882	21.0476
Ccrd_018237	DNA-directed RNA polymerase, RPB5 subunit [Uniprot/SPTREMBL Acc. A0A103Y6L1]	-2.39275	2.0961e-49	2.83472e-47	164.636	33.5423
Ccrd_019651	Cytochrome b561/ferric reductase transmembrane [Uniprot/SPTREMBL Acc. A0A118K156]	-2.39265	1.33618e-22	4.26408e-21	114.381	23.7321
Ccrd_016481	Cupredoxin [Uniprot/SPTREMBL Acc. A0A103Y9W3]	-2.39102	1.49595e-21	4.46453e-20	69.133	14.418
Ccrd_011790		-2.38996	1.48526e-14	2.37974e-13	52.0418	10.864
Ccrd_025893	COX2_CUA domain-containing protein [Uniprot/SPTREMBL Acc. A0A103TPE1]	-2.38443	1.69525e-09	1.55672e-08	6.46046	1.33701
Ccrd_015259	Alpha crystallin/Hsp20 domain-containing protein [Uniprot/SPTREMBL Acc. A0A103YC61]	-2.37717	3.31184e-29	1.69888e-27	8.21677	1.69518
Ccrd_013956	DUF4220 domain-containing protein [Uniprot/SPTREMBL Acc. A0A118K4M7]	-2.37589	9.47425e-08	6.73612e-07	0.775	0.153216
Ccrd_015230	Protein kinase domain-containing protein [Uniprot/SPTREMBL Acc. A0A118K3S4]	-2.36748	5.32163e-28	2.52243e-26	23.4308	4.92155
Ccrd_006679		-2.36604	0.00249107	0.00716782	3.12148	0.645635
Ccrd_020815	Cystatin domain-containing protein [Uniprot/SPTREMBL Acc. A0A103Y1R1]	-2.3612	7.83386e-17	1.57976e-15	20.7232	4.24216
Ccrd_005786	UTP--glucose-1-phosphate uridylyltransferase [Uniprot/SPTREMBL Acc. A0A103XK07]	-2.36075	1.15637e-08	9.48389e-08	2.98956	0.614471
Ccrd_008494	Glutaredoxin domain-containing protein [Uniprot/SPTREMBL Acc. A0A103XF16]	-2.35987	2.51733e-05	0.000115498	2.27989	0.45598
Ccrd_006899	Polyketide cyclase/dehydrase [Uniprot/SPTREMBL Acc. A0A118JTK9]	-2.35688	8.61394e-16	1.56712e-14	89.0871	19.1188
Ccrd_015824		-2.3568	2.46578e-29	1.27162e-27	31.9452	6.67892
Ccrd_015131	Transcription factor, K-box [Uniprot/SPTREMBL Acc. A0A103YCE3]	-2.35189	3.61733e-14	5.54763e-13	19.4299	4.08215
Ccrd_019610	Exostosin domain-containing protein [Uniprot/SPTREMBL Acc. A0A103Y404]	-2.34601	4.38158e-08	3.29325e-07	3.27682	0.661873
Ccrd_021577	MFS domain-containing protein [Uniprot/SPTREMBL Acc. A0A103Y0C7]	-2.34536	4.68013e-08	3.50538e-07	18.7634	4.1149
Ccrd_009063	Uncharacterized protein [Uniprot/SPTREMBL Acc. A0A103YNT8]	-2.34489	1.45002e-06	8.35079e-06	10.3945	2.24601
Ccrd_015687	Dynein light chain [Uniprot/SPTREMBL Acc. A0A103YBD7]	-2.33895	8.6665e-15	1.42883e-13	11.9298	2.4719
Ccrd_018214	UDP-glucuronosyl/UDP-glucosyltransferase [Uniprot/SPTREMBL Acc. A0A118K1Y5]	-2.33389	1.13935e-24	4.19693e-23	6.58211	1.38663
Ccrd_022272	Chloramphenicol acetyltransferase-like domain-containing protein [Uniprot/SPTREMBL Acc. A0A103XZ12]	-2.32882	4.02337e-10	4.019e-09	36.3351	7.8179
Ccrd_026809	Polyprenyl synthetase [Uniprot/SPTREMBL Acc. A0A103XCY3]	-2.32576	3.5308e-06	1.89936e-05	2.60221	0.552205
Ccrd_011783		-2.32534	1.842e-36	1.34933e-34	192.098	41.1024
Ccrd_005592	Uncharacterized protein [Uniprot/SPTREMBL Acc. A0A124SC14]	-2.31937	5.34611e-06	2.79579e-05	1.572	0.34136
Ccrd_010852	NAD(P)-bd_dom domain-containing protein [Uniprot/SPTREMBL Acc. A0A103YKL4]	-2.31918	5.28686e-08	3.92938e-07	1.20041	0.250788
Ccrd_012995	Carbohydrate-binding-like fold [Uniprot/SPTREMBL Acc. A0A103YGI3]	-2.31537	8.80967e-05	0.000361107	0.50636	0.103974
Ccrd_014065	Fe2OG dioxygenase domain-containing protein [Uniprot/SPTREMBL Acc. A0A118K4H0]	-2.31456	4.19986e-32	2.49911e-30	56.0309	12.149
Ccrd_013001	Uncharacterized protein [Uniprot/SPTREMBL Acc. A0A103YGG3]	-2.3134	3.65132e-25	1.38274e-23	8313.2	1813.66
Ccrd_019022	HSF_DOMAIN domain-containing protein [Uniprot/SPTREMBL Acc. A0A118K1F4]	-2.30008	2.75063e-42	2.62042e-40	106.771	23.0741
Ccrd_010481	Histone H2A [Uniprot/SPTREMBL Acc. A0A103YLA3]	-2.29804	1.93519e-08	1.52256e-07	9.57847	2.08303
Ccrd_005739	Aminotran_1_2 domain-containing protein [Uniprot/SPTREMBL Acc. A0A103XK37]	-2.2967	3.68627e-43	3.63718e-41	156.744	34.2005
Ccrd_008566	Aquaporin-like protein [Uniprot/SPTREMBL Acc. A0A103XF12]	-2.29054	8.33044e-06	4.18665e-05	3.3811	0.758391
Ccrd_022043		-2.28436	8.56582e-07	5.14454e-06	4.16645	0.906086
Ccrd_020685	Concanavalin A-like lectin/glucanase, subgroup [Uniprot/SPTREMBL Acc. A0A124SET2]	-2.28009	3.80552e-16	7.17999e-15	0.188588	0.0408723
Ccrd_021859	Pyr_redox_2 domain-containing protein [Uniprot/SPTREMBL Acc. A0A103XZT6]	-2.27542	2.39833e-33	1.5257e-31	18.2681	4.04286
Ccrd_003274	Ctr copper transporter [Uniprot/SPTREMBL Acc. A0A103XPP4]	-2.27387	7.39787e-09	6.2366e-08	142.422	30.3823
Ccrd_026812	Polyprenyl synthetase [Uniprot/SPTREMBL Acc. A0A118JS11]	-2.27241	1.37344e-05	6.64354e-05	1.23954	0.287775
Ccrd_023713	DUF862 domain-containing protein [Uniprot/SPTREMBL Acc. A0A103XWA3]	-2.27014	1.00586e-05	4.975e-05	1.2647	0.279736
Ccrd_023322	Uncharacterized protein [Uniprot/SPTREMBL Acc. A0A118JYS0]	-2.26768	3.97394e-11	4.43462e-10	7.29606	1.59874
Ccrd_004794	Uncharacterized protein [Uniprot/SPTREMBL Acc. A0A103XLW2]	-2.26622	2.2433e-06	1.24988e-05	2.37207	0.506375
Ccrd_005557	Uncharacterized protein [Uniprot/SPTREMBL Acc. A0A103XKH8]	-2.26386	1.5538e-07	1.0603e-06	141.379	33.0562
Ccrd_010478	HMA domain-containing protein [Uniprot/SPTREMBL Acc. A0A103YL71]	-2.25769	1.67709e-18	3.98934e-17	10.4938	2.32843
Ccrd_005242		-2.24774	1.24129e-14	2.01387e-13	9.15526	2.07607
Ccrd_001125	HMA domain-containing protein [Uniprot/SPTREMBL Acc. A0A103XTX8]	-2.2439	1.82625e-16	3.54241e-15	14.4309	3.28328
Ccrd_011498	TCP domain-containing protein [Uniprot/SPTREMBL Acc. A0A103YJ83]	-2.24353	1.38915e-10	1.46802e-09	6.16628	1.37924
Ccrd_023488	Cytochrome P450 [Uniprot/SPTREMBL Acc. A0A103XWQ0]	-2.24134	9.68459e-10	9.20345e-09	2.59111	0.584008
Ccrd_009286		-2.23786	1.60745e-06	9.19991e-06	4.0695	0.916731
Ccrd_005794	Uncharacterized protein [Uniprot/SPTREMBL Acc. A0A103XK54]	-2.23438	8.5526e-07	5.13865e-06	2.44409	0.566445
Ccrd_010315		-2.23314	1.70702e-14	2.71257e-13	102.438	23.6055
Ccrd_021656	Kunitz inhibitor ST1-like protein [Uniprot/SPTREMBL Acc. A0A103Y0A9]	-2.23164	1.95257e-22	6.18015e-21	252.812	57.636
Ccrd_012624	Uncharacterized protein [Uniprot/SPTREMBL Acc. A0A103YH62]	-2.23004	0.0168414	0.0378013	0.407784	0.0818905
Ccrd_004660	RING-type E3 ubiquitin transferase [Uniprot/SPTREMBL Acc. A0A103XM97]	-2.22802	0.000485643	0.00168403	2.53956	0.580609
Ccrd_007650	Carotenoid oxygenase [Uniprot/SPTREMBL Acc. A0A103XGL5]	-2.2263	1.15067e-06	6.74734e-06	1.2856	0.297901
Ccrd_009709	Auxin responsive SAUR protein [Uniprot/SPTREMBL Acc. A0A103YMP6]	-2.22251	3.16615e-05	0.000142033	3.96706	0.91426
Ccrd_003113		-2.22156	5.32809e-06	2.78712e-05	4.54232	1.05642
Ccrd_021043	Na_H_Exchanger domain-containing protein [Uniprot/SPTREMBL Acc. A0A118K024]	-2.21946	4.17323e-05	0.000182758	0.444243	0.103546
Ccrd_025669		-2.21796	9.599e-17	1.91179e-15	20.9621	4.74156
Ccrd_009179	Auxin-responsive protein [Uniprot/SPTREMBL Acc. A0A103YNM0]	-2.21535	3.04563e-12	3.8606e-11	6.16349	1.39065
Ccrd_009502	Uncharacterized protein [Uniprot/SPTREMBL Acc. A0A103YMX1]	-2.20798	0.00216653	0.0063473	0.381487	0.0842613
Ccrd_009155	FLZ-type domain-containing protein [Uniprot/SPTREMBL Acc. A0A118K7L2]	-2.20776	1.50368e-11	1.75496e-10	7.37974	1.67452
Ccrd_004889	DUF641 domain-containing protein [Uniprot/SPTREMBL Acc. A0A103XLR2]	-2.19847	2.0556e-07	1.3765e-06	6.28229	1.42764
Ccrd_025790	Plastocyanin-like domain-containing protein [Uniprot/SPTREMBL Acc. A0A103USH7]	-2.19781	0.000763433	0.00251688	2.02428	0.483217
Ccrd_009751	TPT domain-containing protein [Uniprot/SPTREMBL Acc. A0A118K783]	-2.19727	2.36095e-15	4.14699e-14	9.42977	2.19818
Ccrd_010302	Uncharacterized protein [Uniprot/SPTREMBL Acc. A0A103YLI1]	-2.19663	1.49718e-05	7.19352e-05	2.39541	0.530193
Ccrd_007083	Leucine-rich repeat-containing protein [Uniprot/SPTREMBL Acc. A0A118JTY5]	-2.19613	6.80309e-10	6.60227e-09	1.27743	0.29045
Ccrd_018895	Allene-oxide cyclase [Uniprot/SPTREMBL Acc. A0A103Y5C5]	-2.19585	2.58188e-25	9.90695e-24	220.375	52.2067
Ccrd_018239	Glutaredoxin domain-containing protein [Uniprot/SPTREMBL Acc. A0A103Y6K4]	-2.19488	1.73215e-39	1.44388e-37	100.393	23.3356
Ccrd_023103	Photosystem I PsaN, reaction centre subunit N [Uniprot/SPTREMBL Acc. A0A103XXH5]	-2.19431	8.89881e-08	6.36208e-07	0.912603	0.203438
Ccrd_015064		-2.19399	1.21977e-11	1.44986e-10	35.1772	8.42882
Ccrd_013435	3Beta_HSD domain-containing protein [Uniprot/SPTREMBL Acc. A0A103YFL2]	-2.19081	7.68853e-19	1.89171e-17	53.0866	12.2739
Ccrd_004745	Purple acid phosphatase [Uniprot/SPTREMBL Acc. A0A103XM69]	-2.18882	3.0827e-16	5.87933e-15	71.8707	17.306
Ccrd_012184	Fatty acid desaturase, type 1 [Uniprot/SPTREMBL Acc. A0A124SHG2]	-2.18835	1.41063e-13	2.04653e-12	6.22681	1.46809
Ccrd_017402	Aminotran_1_2 domain-containing protein [Uniprot/SPTREMBL Acc. A0A103Y867]	-2.1882	3.33922e-23	1.11725e-21	26.0251	6.02222
Ccrd_001424	Bet_v_1 domain-containing protein [Uniprot/SPTREMBL Acc. A0A118JY38]	-2.18583	0.000252784	0.000939934	0.950974	0.200635
Ccrd_015831		-2.18563	0.0135039	0.0312758	0.865121	0.212397
Ccrd_005855	RING-type domain-containing protein [Uniprot/SPTREMBL Acc. A0A103XK12]	-2.18284	1.517e-12	1.98494e-11	12.3261	2.91937
Ccrd_002881		-2.18225	4.19885e-26	1.70951e-24	163.739	38.695
Ccrd_018234	Uncharacterized protein [Uniprot/SPTREMBL Acc. A0A118K1X7]	-2.18204	1.05761e-35	7.46461e-34	25.0734	5.8771
Ccrd_010560	Protein kinase domain-containing protein [Uniprot/SPTREMBL Acc. A0A103YL21]	-2.18129	2.73305e-15	4.7531e-14	11.2015	2.60291
Ccrd_009142	Sm domain-containing protein [Uniprot/SPTREMBL Acc. A0A103YNS7]	-2.18099	0.00241533	0.00697478	2.27202	0.529146
Ccrd_021352	CCT domain-containing protein [Uniprot/SPTREMBL Acc. A0A103Y0U1]	-2.17731	9.38997e-07	5.59435e-06	1.64316	0.379694
Ccrd_019572	BES1_N domain-containing protein [Uniprot/SPTREMBL Acc. A0A103Y419]	-2.17265	1.43602e-11	1.68311e-10	17.035	4.10003
Ccrd_018242	Calcium-binding EF-hand [Uniprot/SPTREMBL Acc. A0A103Y6L2]	-2.1716	7.33614e-37	5.45668e-35	337.461	79.7424
Ccrd_006238	Cation efflux protein [Uniprot/SPTREMBL Acc. A0A103XJ79]	-2.1686	3.24213e-07	2.09627e-06	2.97629	0.712575
Ccrd_017751		-2.16856	3.13249e-27	1.38943e-25	53.6814	12.8756
Ccrd_012038	S-adenosylmethionine synthase [Uniprot/SPTREMBL Acc. A0A103YI59]	-2.16786	4.5073e-20	1.22082e-18	2647.6	631.607
Ccrd_002217	Glucose/ribitol dehydrogenase [Uniprot/SPTREMBL Acc. A0A103XRV9]	-2.1675	2.12269e-14	3.34206e-13	49.4146	11.5909
Ccrd_018094	Metallothionein, family 15, plant [Uniprot/SPTREMBL Acc. A0A103Y6W0]	-2.16495	3.73393e-14	5.71738e-13	423.181	104.043
Ccrd_009059	Uncharacterized protein [Uniprot/SPTREMBL Acc. A0A103YNV0]	-2.16213	2.98258e-05	0.000134682	1.31672	0.294138
Ccrd_002880		-2.15914	1.34209e-17	2.93938e-16	471.003	111.724
Ccrd_016005	UbiE/COQ5 methyltransferase [Uniprot/SPTREMBL Acc. A0A103YAR8]	-2.15637	0.00141362	0.00435067	0.784134	0.192778
Ccrd_009317	Ran GTPase [Uniprot/SPTREMBL Acc. A0A103YNH5]	-2.15065	1.07737e-32	6.59343e-31	98.0455	23.7399
Ccrd_021358	Auxin-responsive protein [Uniprot/SPTREMBL Acc. A0A124SEK9]	-2.14964	9.42222e-29	4.70843e-27	178.298	43.2289
Ccrd_026417	Proteinase inhibitor I13, potato inhibitor I [Uniprot/SPTREMBL Acc. A0A103Q5D0]	-2.14786	1.48857e-05	7.16106e-05	4.39058	1.04072
Ccrd_026058	Magnesium transporter [Uniprot/SPTREMBL Acc. A0A103SVL2]	-2.14784	1.05223e-41	9.69004e-40	101.494	24.4323
Ccrd_019021	EF-hand domain-containing protein [Uniprot/SPTREMBL Acc. A0A103Y533]	-2.14752	3.79329e-06	2.0304e-05	5.42444	1.28381
Ccrd_026736		-2.14738	2.15418e-08	1.6839e-07	3.13913	0.757482
Ccrd_007765		-2.14479	1.75292e-11	2.03601e-10	7.30991	1.72452
Ccrd_018120	11-S seed storage protein, plant [Uniprot/SPTREMBL Acc. A0A103Y6T3]	-2.14336	6.23688e-29	3.16575e-27	159.21	38.8771
Ccrd_012033	Protein kinase domain-containing protein [Uniprot/SPTREMBL Acc. A0A103YIB0]	-2.14252	3.83523e-24	1.36341e-22	12.4795	3.00703
Ccrd_011523	Cupredoxin [Uniprot/SPTREMBL Acc. A0A103YJ49]	-2.14019	3.79971e-17	7.89287e-16	33.6003	8.16124
Ccrd_002422		-2.13791	1.2155e-12	1.60784e-11	13.5954	3.35015
Ccrd_002552	BYPASS-related protein [Uniprot/SPTREMBL Acc. A0A103XR96]	-2.13721	0.00126393	0.00394308	0.379422	0.0987105
Ccrd_007119	Amino acid/polyamine transporter I [Uniprot/SPTREMBL Acc. A0A118JU26]	-2.13719	4.9193e-22	1.51729e-20	8.76829	2.11849
Ccrd_003442	Pectinesterase [Uniprot/SPTREMBL Acc. A0A103XPH8]	-2.13708	1.19752e-22	3.83424e-21	23.5251	5.78338
Ccrd_015241	Uncharacterized protein [Uniprot/SPTREMBL Acc. A0A103YC76]	-2.13534	2.10513e-10	2.17242e-09	90.9994	22.3055
Ccrd_020610	Ran GTPase [Uniprot/SPTREMBL Acc. A0A103Y254]	-2.13534	0.00631413	0.0162142	1.07804	0.263026
Ccrd_004780	X8 domain-containing protein [Uniprot/SPTREMBL Acc. A0A103XLW5]	-2.13487	1.28588e-25	5.05439e-24	153.223	37.6882
Ccrd_006842	HTH myb-type domain-containing protein [Uniprot/SPTREMBL Acc. A0A103XI48]	-2.13424	0.00739985	0.0185803	0.910249	0.217148
Ccrd_015418	3-oxo-5-alpha-steroid 4-dehydrogenase, C-terminal [Uniprot/SPTREMBL Acc. A0A124SGF5]	-2.12837	1.34266e-08	1.08552e-07	3.07826	0.74203
Ccrd_007436	Glycoside hydrolase family 3 [Uniprot/SPTREMBL Acc. A0A103XGY9]	-2.12244	6.56697e-07	4.02404e-06	1.43907	0.350403
Ccrd_016531	SSXT-like protein [Uniprot/SPTREMBL Acc. A0A103Y9R7]	-2.12107	1.67838e-06	9.56907e-06	4.69884	1.15694
Ccrd_011185		-2.12098	9.41127e-11	1.01282e-09	14.3152	3.52683
Ccrd_012730	Uncharacterized protein [Uniprot/SPTREMBL Acc. A0A124SHA2]	-2.10997	1.59642e-07	1.0867e-06	69.644	18.0062
Ccrd_016057	M20_dimer domain-containing protein [Uniprot/SPTREMBL Acc. A0A103YAR1]	-2.10835	3.82748e-06	2.04813e-05	1.65069	0.392313
Ccrd_014264		-2.10799	3.24119e-26	1.33649e-24	24.0823	5.92221
Ccrd_007512	Phenylalanine ammonia-lyase [Uniprot/SPTREMBL Acc. A0A124SBF6]	-2.10786	9.48056e-17	1.8921e-15	320.336	78.5404
Ccrd_010658	AAI domain-containing protein [Uniprot/SPTREMBL Acc. A0A103YKV0]	-2.10773	2.70202e-13	3.79204e-12	509.993	129.076
Ccrd_011577	LRRNT_2 domain-containing protein [Uniprot/SPTREMBL Acc. A0A118K620]	-2.1056	2.10955e-10	2.17582e-09	3.02435	0.737658
Ccrd_011600	Concanavalin A-like lectin/glucanase superfamily [Uniprot/SPTREMBL Acc. A0A118K624]	-2.10174	0.000388389	0.00138198	0.535106	0.121406
Ccrd_011470	Cytochrome b5 heme-binding domain-containing protein [Uniprot/SPTREMBL Acc. A0A103YJE4]	-2.09989	1.92327e-21	5.69589e-20	34.1629	8.55452
Ccrd_024423		-2.09929	2.36532e-08	1.8415e-07	2.40361	0.576313
Ccrd_024421		-2.0967	1.24188e-13	1.80984e-12	19.9701	5.04463
Ccrd_017353	RING-type domain-containing protein [Uniprot/SPTREMBL Acc. A0A103Y890]	-2.09608	2.80531e-07	1.83408e-06	98.8996	25.0666
Ccrd_010060		-2.09505	5.49221e-06	2.866e-05	9.6792	2.47281
Ccrd_009409	S-acyltransferase [Uniprot/SPTREMBL Acc. A0A103YN81]	-2.0921	3.58327e-05	0.000158828	1.29225	0.301032
Ccrd_005155	Glycos_transf_3 domain-containing protein [Uniprot/SPTREMBL Acc. A0A103XLB6]	-2.09187	3.95745e-06	2.11417e-05	3.81057	0.957381
Ccrd_019237	Aldolase-type TIM barrel [Uniprot/SPTREMBL Acc. A0A124SF89]	-2.09072	0.000248345	0.000925029	0.4447	0.117873
Ccrd_004990	Homeodomain-containing protein [Uniprot/SPTREMBL Acc. A0A118JUS6]	-2.09036	5.72325e-32	3.354e-30	24.4054	6.13718
Ccrd_018217	Cytokinin dehydrogenase [Uniprot/SPTREMBL Acc. A0A124SFJ8]	-2.09035	0.000233708	0.000875406	1.11413	0.270528
Ccrd_016190		-2.08878	3.10191e-25	1.18319e-23	23.1179	5.83044
Ccrd_015769	Protein kinase domain-containing protein [Uniprot/SPTREMBL Acc. A0A118K3G0]	-2.08801	1.13188e-16	2.23361e-15	47.351	11.8509
Ccrd_014843		-2.08342	1.88007e-06	1.06111e-05	4.22168	1.04202
Ccrd_000349		-2.08096	1.39215e-14	2.23983e-13	20.2219	5.20733
Ccrd_025543	LRRNT_2 domain-containing protein [Uniprot/SPTREMBL Acc. A0A118JJB1]	-2.08	1.72092e-05	8.17109e-05	1.23887	0.304295
Ccrd_005223		-2.0778	5.52101e-34	3.64406e-32	31.2167	7.93534
Ccrd_024661		-2.07473	0.00041554	0.00146564	1.39849	0.32184
Ccrd_017750		-2.06943	2.47462e-25	9.51425e-24	17.4238	4.44302
Ccrd_003740	Gnk2-homologous domain-containing protein [Uniprot/SPTREMBL Acc. A0A103XNU1]	-2.06838	9.10114e-20	2.41105e-18	21.7866	5.59756
Ccrd_019357		-2.06731	1.30107e-17	2.85277e-16	14.5885	3.74746
Ccrd_005524	RING-type domain-containing protein [Uniprot/SPTREMBL Acc. A0A103XKJ6]	-2.06686	6.27186e-06	3.22412e-05	4.4025	1.15888
Ccrd_025772	NB-ARC domain-containing protein [Uniprot/SPTREMBL Acc. A0A103XDK7]	-2.06428	2.28468e-05	0.000105752	0.68393	0.172243
Ccrd_016475	Mechanosensitive ion channel protein [Uniprot/SPTREMBL Acc. A0A103Y9U8]	-2.06159	3.69479e-07	2.36836e-06	0.931664	0.229601
Ccrd_020703	Uncharacterized protein [Uniprot/SPTREMBL Acc. A0A118K0E8]	-2.06043	1.0394e-19	2.73856e-18	6.68102	1.69521
Ccrd_014337	NB-ARC domain-containing protein [Uniprot/SPTREMBL Acc. A0A103YE14]	-2.05998	4.07311e-17	8.4336e-16	7.77939	1.98621
Ccrd_016089	AMPK1_CBM domain-containing protein [Uniprot/SPTREMBL Acc. A0A103YAL7]	-2.05926	0.000194098	0.000740368	28.1469	7.70244
Ccrd_009942	FAD-binding FR-type domain-containing protein [Uniprot/SPTREMBL Acc. A0A103YM75]	-2.0563	1.88104e-05	8.84664e-05	2.02931	0.50021
Ccrd_018691		-2.05318	1.15698e-28	5.72249e-27	254.939	66.2723
Ccrd_002494	C4-dicarboxylate transporter/malic acid transport protein [Uniprot/SPTREMBL Acc. A0A103XR98]	-2.05279	0.000174616	0.000672421	0.647402	0.167866
Ccrd_020235	Cytokinin dehydrogenase [Uniprot/SPTREMBL Acc. A0A103Y2U5]	-2.05235	1.85033e-13	2.65259e-12	5.32973	1.35661
Ccrd_026376	Apple-like protein [Uniprot/SPTREMBL Acc. A0A118HIH7]	-2.05169	1.09506e-10	1.16937e-09	3.19672	0.80702
Ccrd_011552	LRRNT_2 domain-containing protein [Uniprot/SPTREMBL Acc. A0A124SHN2]	-2.0506	5.16754e-08	3.84958e-07	19.8439	5.12443
Ccrd_020509		-2.05058	5.56537e-08	4.11424e-07	1.39475	0.355639
Ccrd_001880	Aquaporin-like protein [Uniprot/SPTREMBL Acc. A0A118JWT1]	-2.04932	5.83746e-20	1.56358e-18	68.2091	17.8631
Ccrd_009985		-2.04867	3.11269e-16	5.93067e-15	52.0416	13.2516
Ccrd_009641	Zinc/iron permease [Uniprot/SPTREMBL Acc. A0A118K7C0]	-2.0441	1.47503e-25	5.73957e-24	921.09	240.457
Ccrd_010667	HMA domain-containing protein [Uniprot/SPTREMBL Acc. A0A103YKY0]	-2.04294	6.07874e-21	1.75458e-19	3.42927	0.890754
Ccrd_005261	Glycogen/starch synthase, ADP-glucose type [Uniprot/SPTREMBL Acc. A0A118JUW4]	-2.04254	7.54524e-05	0.00031306	0.556092	0.141063
Ccrd_001984	Armadillo-type fold [Uniprot/SPTREMBL Acc. A0A124SD56]	-2.04108	5.36085e-08	3.97979e-07	2.36445	0.608904
Ccrd_010424		-2.0391	1.98922e-10	2.06049e-09	117.284	31.4024
Ccrd_007113	4-coumarate--CoA ligase [Uniprot/SPTREMBL Acc. A0A103XHK5]	-2.03884	1.29901e-27	5.91095e-26	61.265	15.8116
Ccrd_008721	S5A_REDUCTASE domain-containing protein [Uniprot/SPTREMBL Acc. A0A118JTA0]	-2.03872	0.000257198	0.000953595	4.17726	1.08951
Ccrd_025266	Gal_mutarotas_2 domain-containing protein [Uniprot/SPTREMBL Acc. A0A118JRW7]	-2.03538	6.4499e-31	3.60505e-29	153.863	39.8493
Ccrd_016657	Protein kinase domain-containing protein [Uniprot/SPTREMBL Acc. A0A103Y9J0]	-2.03327	0.000136105	0.000536952	1.31459	0.336681
Ccrd_013397		-2.0324	2.82556e-31	1.6119e-29	175.704	46.0357
Ccrd_007497	Peroxidase [Uniprot/SPTREMBL Acc. A0A103XGU7]	-2.02983	6.03175e-10	5.8676e-09	6.97527	1.81285
Ccrd_015788		-2.02367	7.89837e-07	4.7808e-06	11.2132	3.04813
Ccrd_009307		-2.02212	1.9173e-08	1.51095e-07	53.0947	14.3318
Ccrd_020142	Cytochrome b6/f complex, subunit 5 [Uniprot/SPTREMBL Acc. A0A103Y302]	-2.01773	0.000799752	0.00262766	3.12462	0.786632
Ccrd_023148	ACT domain-containing protein [Uniprot/SPTREMBL Acc. A0A103XXA8]	-2.01617	9.71618e-09	8.05406e-08	2.86376	0.747661
Ccrd_016363	Aminotransferase class-III [Uniprot/SPTREMBL Acc. A0A103YA15]	-2.01142	3.45966e-17	7.22532e-16	12.5644	3.29048
Ccrd_001989		-2.01118	0.00252504	0.00725044	2.10098	0.537137
Ccrd_019195		-2.01103	3.36024e-20	9.19147e-19	31.3861	8.26818
Ccrd_009518	Cornichon [Uniprot/SPTREMBL Acc. A0A103YMW6]	-2.00776	8.10179e-18	1.82187e-16	15.7976	4.23944
Ccrd_007726	Longin domain-containing protein [Uniprot/SPTREMBL Acc. A0A124SBC9]	-2.00656	2.08933e-16	4.03249e-15	10.3466	2.7361
Ccrd_023262	Calcium-binding EF-hand [Uniprot/SPTREMBL Acc. A0A118JYX5]	-2.00627	4.14812e-10	4.13507e-09	8.51251	2.21341
Ccrd_010654	Aminotran_1_2 domain-containing protein [Uniprot/SPTREMBL Acc. A0A103YKQ7]	-1.99927	1.96277e-13	2.80754e-12	7.70947	2.03975
Ccrd_018240	3-hydroxyisobutyrate dehydrogenase [Uniprot/SPTREMBL Acc. A0A103Y6J4]	-1.99828	1.96944e-15	3.47827e-14	19.0478	5.08673
Ccrd_005364	Endo-1,3(4)-beta-glucanase [Uniprot/SPTREMBL Acc. A0A103XL76]	-1.99671	5.57472e-05	0.000238411	0.668026	0.167924
Ccrd_015546	Uncharacterized protein [Uniprot/SPTREMBL Acc. A0A103YBM8]	-1.99568	0.00165599	0.00500669	1.05052	0.276961
Ccrd_018945		-1.99429	0.000128305	0.000509295	4.22052	1.07156
Ccrd_021350	Caleosin [Uniprot/SPTREMBL Acc. A0A103Y0S4]	-1.99005	4.63019e-12	5.76582e-11	59.9944	16.4113
Ccrd_009418		-1.98901	4.8164e-10	4.74988e-09	4.73327	1.27155
Ccrd_014615		-1.98743	0.00167834	0.00506594	2.49887	0.684006
Ccrd_008486		-1.98625	6.03344e-12	7.38953e-11	6781.54	1878.82
Ccrd_008194	Nodulin-like domain-containing protein [Uniprot/SPTREMBL Acc. A0A118JT78]	-1.98314	0.00038018	0.00135752	0.58289	0.15772
Ccrd_015577	Epimerase domain-containing protein [Uniprot/SPTREMBL Acc. A0A118K3K4]	-1.98111	1.06338e-23	3.65919e-22	191.404	51.7703
Ccrd_015356		-1.97767	4.6425e-24	1.64736e-22	53.1998	14.4078
Ccrd_003903	Flavin-containing monooxygenase [Uniprot/SPTREMBL Acc. A0A118JVN8]	-1.97466	2.21565e-15	3.90242e-14	16.071	4.36869
Ccrd_010277	Glutathione S-transferase/chloride channel, C-terminal [Uniprot/SPTREMBL Acc. A0A124SI20]	-1.97434	6.15878e-06	3.1702e-05	3.96082	1.06709
Ccrd_026197		-1.97238	4.97947e-29	2.54756e-27	44.2999	12.0959
Ccrd_018115	UAA transporter [Uniprot/SPTREMBL Acc. A0A103Y6U4]	-1.97222	6.58377e-22	2.00509e-20	47.6633	12.8255
Ccrd_010056		-1.97087	4.5545e-17	9.38014e-16	58.2777	16.0583
Ccrd_018241		-1.97058	1.74798e-20	4.89914e-19	39.056	10.6914
Ccrd_002044	NADPH-protochlorophyllide oxidoreductase [Uniprot/SPTREMBL Acc. A0A124SD57]	-1.96894	4.01245e-16	7.52637e-15	7.25332	1.98328
Ccrd_009865		-1.96661	4.21982e-05	0.000184506	1.26539	0.327905
Ccrd_016995	Reticulon-like protein [Uniprot/SPTREMBL Acc. A0A118K2P9]	-1.96589	2.95893e-08	2.27526e-07	10.1403	2.76434
Ccrd_026200	Exostosin domain-containing protein [Uniprot/SPTREMBL Acc. A0A103S0Y9]	-1.96524	0.0139936	0.0322208	1.12747	0.293917
Ccrd_010397		-1.96214	1.88685e-25	7.31259e-24	335.153	92.7701
Ccrd_005976	ANK_REP_REGION domain-containing protein [Uniprot/SPTREMBL Acc. A0A103XJQ9]	-1.96079	4.29657e-12	5.36766e-11	33.3278	9.10274
Ccrd_004358	Lipoxygenase domain-containing protein [Uniprot/SPTREMBL Acc. A0A103XMQ6]	-1.95612	1.98388e-05	9.29191e-05	1.59663	0.43449
Ccrd_018605		-1.95498	2.66387e-25	1.02013e-23	18.4726	5.11122
Ccrd_026462	PBPe domain-containing protein [Uniprot/SPTREMBL Acc. A0A103PUM1]	-1.95101	1.40268e-10	1.48151e-09	6.11771	1.66435
Ccrd_004118	Uncharacterized protein [Uniprot/SPTREMBL Acc. A0A103XN72]	-1.95051	2.84688e-08	2.19521e-07	2.21001	0.601353
Ccrd_014112	MFS domain-containing protein [Uniprot/SPTREMBL Acc. A0A103YEG3]	-1.94909	4.73099e-19	1.18055e-17	12.958	3.6212
Ccrd_012610		-1.94828	1.47875e-10	1.5576e-09	16.8265	4.76376
Ccrd_012309	Peptidase S10, serine carboxypeptidase [Uniprot/SPTREMBL Acc. A0A118K5M4]	-1.94716	4.61484e-10	4.56503e-09	4.19447	1.1553
Ccrd_010510	Major facilitator superfamily domain, general substrate transporter [Uniprot/SPTREMBL Acc. A0A103YL51]	-1.94704	3.24813e-29	1.67063e-27	44.1745	12.168
Ccrd_017606	ADF-H domain-containing protein [Uniprot/SPTREMBL Acc. A0A118K2B0]	-1.94698	2.03581e-19	5.20775e-18	58.6446	16.2835
Ccrd_020502	Protein-serine/threonine phosphatase [Uniprot/SPTREMBL Acc. A0A103Y2B4]	-1.94499	1.74021e-19	4.49318e-18	12.7811	3.55079
Ccrd_016731		-1.94474	1.21413e-07	8.49801e-07	9.39313	2.64013
Ccrd_005219	Adenosinetriphosphatase [Uniprot/SPTREMBL Acc. A0A118JUW2]	-1.9427	4.90251e-31	2.76413e-29	130.033	36.2367
Ccrd_017513	3-hydroxy-3-methylglutaryl coenzyme A reductase [Uniprot/SPTREMBL Acc. A0A103Y7Y0]	-1.94115	7.51156e-07	4.55951e-06	13.2165	3.61283
Ccrd_007124		-1.93995	1.91949e-14	3.03277e-13	20.1489	5.56625
Ccrd_016461		-1.93713	9.33509e-10	8.88879e-09	95.8296	27.5668
Ccrd_007621	Nucleotide-binding, alpha-beta plait [Uniprot/SPTREMBL Acc. A0A103XGL2]	-1.93469	1.59472e-27	7.22253e-26	13.9525	3.89419
Ccrd_004956	Auxin-responsive protein [Uniprot/SPTREMBL Acc. A0A103XLS3]	-1.93208	3.99627e-15	6.83323e-14	9.11003	2.53224
Ccrd_010362	Peptidase A1 domain-containing protein [Uniprot/SPTREMBL Acc. A0A103YLI3]; Cardosin-E [Uniprot/SWISSPROT Acc. P85136]	-1.93056	1.80889e-26	7.62139e-25	744.312	207.411
Ccrd_024175	Protein DETOXIFICATION [Uniprot/SPTREMBL Acc. A0A103XCS3]	-1.92687	1.77797e-19	4.58455e-18	37.0533	10.5287
Ccrd_016910	PDZ domain-containing protein [Uniprot/SPTREMBL Acc. A0A103Y919]	-1.9266	3.6828e-05	0.000162867	1.99606	0.578879
Ccrd_010866		-1.92526	2.59935e-08	2.01317e-07	17.1863	4.93826
Ccrd_017617	Uncharacterized protein [Uniprot/SPTREMBL Acc. A0A103Y7R8]	-1.92509	4.94854e-06	2.60054e-05	1.9541	0.553319
Ccrd_022985	Cation_ATPase_N domain-containing protein [Uniprot/SPTREMBL Acc. A0A118JYX9]	-1.92449	3.52674e-15	6.05179e-14	38.889	11.1531
Ccrd_015806		-1.92397	1.71075e-15	3.03246e-14	5.55213	1.56675
Ccrd_009374	Organic solute transporter Ost-alpha [Uniprot/SPTREMBL Acc. A0A103YNB3]	-1.9228	6.50264e-06	3.33478e-05	1.89939	0.52757
Ccrd_003742	dCTP pyrophosphatase 1 [Uniprot/SPTREMBL Acc. A0A103XNS7]	-1.92186	0.012139	0.0285997	0.397129	0.100089
Ccrd_017387		-1.91813	2.20217e-11	2.52897e-10	27.0683	7.66905
Ccrd_018095	Uncharacterized protein [Uniprot/SPTREMBL Acc. A0A103Y6V0]	-1.91706	9.76134e-16	1.76755e-14	9309.9	2667.96
Ccrd_018030	SOR_SNZ domain-containing protein [Uniprot/SPTREMBL Acc. A0A103Y6X7]	-1.91698	0.00046547	0.0016231	1.07412	0.290597
Ccrd_009384	Ferric reductase, NAD binding [Uniprot/SPTREMBL Acc. A0A118K7G9]	-1.91356	1.17221e-09	1.10098e-08	2.32184	0.655364
Ccrd_015691	MFS domain-containing protein [Uniprot/SPTREMBL Acc. A0A103YBE8]	-1.91231	4.29165e-10	4.26496e-09	4.97303	1.42655
Ccrd_007231	Major facilitator superfamily [Uniprot/SPTREMBL Acc. A0A124SBI4]	-1.90805	6.52412e-14	9.72034e-13	441.205	128.398
Ccrd_026664		-1.90694	0.000536782	0.00184286	0.8331	0.236188
Ccrd_012203	PlsC domain-containing protein [Uniprot/SPTREMBL Acc. A0A118K5P9]	-1.90555	5.78745e-05	0.000246582	2.28021	0.628842
Ccrd_012668		-1.90211	0.00604766	0.0156191	10.3526	2.97991
Ccrd_026268	TIR domain-containing protein [Uniprot/SPTREMBL Acc. A0A103RKH8]	-1.90149	8.22322e-09	6.87841e-08	6.13009	1.73083
Ccrd_014380	HPt domain-containing protein [Uniprot/SPTREMBL Acc. A0A103YE08]	-1.89919	8.21403e-29	4.12601e-27	29.3785	8.4153
Ccrd_003395	Uncharacterized protein [Uniprot/SPTREMBL Acc. A0A103XPI6]	-1.89329	9.69975e-06	4.81601e-05	98.6443	29.5786
Ccrd_022292		-1.8924	0.0111999	0.0266842	1.32479	0.350183
Ccrd_001601	Cytochrome b561 domain-containing protein [Uniprot/SPTREMBL Acc. A0A103XSY4]	-1.89014	2.59859e-08	2.01317e-07	16.4082	4.86623
Ccrd_013155	POT1PC domain-containing protein [Uniprot/SPTREMBL Acc. A0A118K535]	-1.88784	6.61958e-06	3.38936e-05	4.47406	1.27544
Ccrd_005110	Gp_dh_N domain-containing protein [Uniprot/SPTREMBL Acc. A0A103XLL0]	-1.88438	2.63895e-05	0.000120422	2.70802	0.785074
Ccrd_023462	Chloramphenicol acetyltransferase-like domain-containing protein [Uniprot/SPTREMBL Acc. A0A103XWS7]	-1.88436	1.69774e-19	4.39525e-18	45.8043	13.4153
Ccrd_009627		-1.88384	6.70715e-14	9.97766e-13	29.6714	8.6868
Ccrd_021181	PPC domain-containing protein [Uniprot/SPTREMBL Acc. A0A103Y120]	-1.88341	1.14259e-16	2.25016e-15	69.2116	20.3071
Ccrd_025194		-1.88271	0.00214753	0.00629641	5.97294	1.77009
Ccrd_010623		-1.88201	4.3896e-17	9.05016e-16	83.6845	24.3881
Ccrd_011248		-1.8811	8.01404e-07	4.84514e-06	1.47904	0.416367
Ccrd_017695	Pectinesterase [Uniprot/SPTREMBL Acc. A0A103Y7L1]	-1.88038	4.75797e-15	8.06436e-14	36.7563	10.5984
Ccrd_015096		-1.87887	2.20249e-12	2.83204e-11	36.2986	10.3287
Ccrd_009588	Nudix hydrolase domain-containing protein [Uniprot/SPTREMBL Acc. A0A118K7A5]	-1.87784	5.95219e-09	5.09785e-08	4.73348	1.3558
Ccrd_019517		-1.87524	3.05832e-15	5.28551e-14	7.47547	2.16268
Ccrd_020221	Uncharacterized protein [Uniprot/SPTREMBL Acc. A0A103Y2V6]	-1.87511	1.42568e-07	9.79788e-07	11.6867	3.47071
Ccrd_018543	Phospho-2-dehydro-3-deoxyheptonate aldolase [Uniprot/SPTREMBL Acc. A0A118K1N3]	-1.87455	6.12733e-27	2.63326e-25	306.346	89.2563
Ccrd_014315	Dehydrin [Uniprot/SPTREMBL Acc. A0A118K4D1]	-1.87209	6.82035e-10	6.61478e-09	242.933	73.2292
Ccrd_003417		-1.87093	1.6972e-14	2.70142e-13	365.131	106.863
Ccrd_020575	CCAAT-binding factor, conserved site-containing protein [Uniprot/SPTREMBL Acc. A0A103Y293]	-1.86999	0.000248843	0.000926706	1.0184	0.30063
Ccrd_017607	Peptidase S8/S53 domain-containing protein [Uniprot/SPTREMBL Acc. A0A103Y7T2]	-1.86875	2.22161e-19	5.67551e-18	13.2875	3.91999
Ccrd_026283	Protein kinase domain-containing protein [Uniprot/SPTREMBL Acc. A0A103R8Y5]	-1.86082	5.75973e-24	2.02892e-22	19.8899	5.87524
Ccrd_009683	Elf4 domain-containing protein [Uniprot/SPTREMBL Acc. A0A118K792]	-1.85951	6.87785e-16	1.26436e-14	41.9333	12.4289
Ccrd_009664		-1.85924	0.00643731	0.0164927	1.62901	0.494591
Ccrd_025296	Mpv17/PMP22 [Uniprot/SPTREMBL Acc. A0A103XB43]	-1.85612	9.96408e-28	4.60994e-26	108.652	31.8553
Ccrd_010237	NADH dehydrogenase [ubiquinone] 1 alpha subcomplex subunit 1 [Uniprot/SPTREMBL Acc. A0A118K6W9]	-1.85525	1.3204e-26	5.6245e-25	10.8958	3.23896
Ccrd_001867	NAC domain-containing protein [Uniprot/SPTREMBL Acc. A0A103XSG1]	-1.85385	1.19168e-17	2.62183e-16	24.9563	7.43012
Ccrd_012517	Calcium-binding EF-hand [Uniprot/SPTREMBL Acc. A0A103YHF0]	-1.85316	1.59771e-23	5.43027e-22	213.958	63.2322
Ccrd_003783	Uncharacterized protein [Uniprot/SPTREMBL Acc. A0A103XNM6]	-1.85314	0.00640078	0.0164062	2.15776	0.652877
Ccrd_009919		-1.85213	1.68625e-08	1.34144e-07	7.51532	2.2483
Ccrd_002341		-1.84898	5.22136e-06	2.73573e-05	2.14094	0.632415
Ccrd_019966	LEA_2 domain-containing protein [Uniprot/SPTREMBL Acc. A0A103Y3F3]	-1.84853	1.3421e-07	9.28289e-07	9.32813	2.78413
Ccrd_009595	DDE Tnp4 domain-containing protein [Uniprot/SPTREMBL Acc. A0A103YMW1]	-1.84765	1.84555e-15	3.26542e-14	12.3016	3.68882
Ccrd_018227	Calcium-binding EF-hand [Uniprot/SPTREMBL Acc. A0A103Y6M6]	-1.84622	2.6821e-15	4.66869e-14	200.258	60.8074
Ccrd_013875	Cytokinin riboside 5'-monophosphate phosphoribohydrolase [Uniprot/SPTREMBL Acc. A0A103YES0]	-1.84592	2.73461e-05	0.000124405	2.4013	0.718802
Ccrd_022501		-1.84537	2.00276e-22	6.31833e-21	9.92866	2.96757
Ccrd_005250		-1.84459	1.42818e-17	3.11733e-16	5.14091	1.53355
Ccrd_025857	Uncharacterized protein [Uniprot/SPTREMBL Acc. A0A103XDH7]	-1.8435	8.45152e-05	0.000347827	6.96932	2.12618
Ccrd_026076		-1.83963	0.00105	0.00334529	3.44461	1.0318
Ccrd_018110	HTH myb-type domain-containing protein [Uniprot/SPTREMBL Acc. A0A103Y6W2]	-1.83885	2.32163e-07	1.53971e-06	10.4242	3.10832
Ccrd_006469		-1.83825	1.14009e-08	9.36233e-08	2.61624	0.777718
Ccrd_003589	DUF4378 domain-containing protein [Uniprot/SPTREMBL Acc. A0A103XPA2]	-1.83793	1.05478e-16	2.09214e-15	40.1154	11.9941
Ccrd_009818		-1.83663	9.90364e-19	2.41217e-17	20.214	6.00404
Ccrd_009408	Aquaporin-like protein [Uniprot/SPTREMBL Acc. A0A103YNA2]	-1.83564	7.09941e-09	6.00856e-08	4.96208	1.45413
Ccrd_002909		-1.83528	0.00029167	0.00106739	1.98481	0.59627
Ccrd_005863	Initiation factor 2B-related protein [Uniprot/SPTREMBL Acc. A0A103XK10]	-1.83418	8.79182e-21	2.50405e-19	15.7948	4.77328
Ccrd_002712	Barwin-like endoglucanase [Uniprot/SPTREMBL Acc. A0A103XQY5]	-1.83341	4.19233e-14	6.35387e-13	10.1057	3.04387
Ccrd_009939	Auxin-responsive protein [Uniprot/SPTREMBL Acc. A0A118K747]	-1.83295	3.7367e-24	1.33083e-22	95.0571	28.5799
Ccrd_001343	Uncharacterized protein [Uniprot/SPTREMBL Acc. A0A124SDC9]	-1.82846	0.00249666	0.00718282	1.087	0.322039
Ccrd_002369	WRKY domain-containing protein [Uniprot/SPTREMBL Acc. A0A103XRM7]	-1.8273	0.0110759	0.0264213	0.579151	0.164661
Ccrd_004518	PUM-HD domain-containing protein [Uniprot/SPTREMBL Acc. A0A103XME4]	-1.82676	1.681e-07	1.14026e-06	2.08313	0.62931
Ccrd_023257	Uncharacterized protein [Uniprot/SPTREMBL Acc. A0A103XX85]	-1.82558	1.69883e-14	2.70178e-13	58.5342	17.3072
Ccrd_003899	Pectinesterase [Uniprot/SPTREMBL Acc. A0A103XNX1]	-1.82446	0.00996372	0.024053	0.731678	0.218368
Ccrd_025309	Ribosomal protein [Uniprot/SPTREMBL Acc. A0A103XB35]	-1.8237	1.24884e-26	5.3314e-25	42.57	12.863
Ccrd_003587	Calcium-binding EF-hand [Uniprot/SPTREMBL Acc. A0A103XP33]	-1.82192	3.91035e-06	2.09017e-05	8.4337	2.51001
Ccrd_009065	Glycosyl-phosphatidyl inositol-anchored, plant [Uniprot/SPTREMBL Acc. A0A118K7N7]	-1.82184	1.49172e-14	2.38811e-13	8.81689	2.67687
Ccrd_021107	C2 calcium-dependent membrane targeting [Uniprot/SPTREMBL Acc. A0A103Y176]	-1.82005	3.88449e-05	0.000171043	0.530797	0.157365
Ccrd_017011	CAAX amino terminal protease [Uniprot/SPTREMBL Acc. A0A103Y8V9]	-1.81823	2.36057e-14	3.69046e-13	9.13384	2.76907
Ccrd_001388		-1.81696	0.0033798	0.00936935	0.228646	0.0662799
Ccrd_009379	Uncharacterized protein [Uniprot/SPTREMBL Acc. A0A103YNA5]	-1.81659	4.69487e-23	1.54675e-21	39.3036	11.9842
Ccrd_018250	Thiamine biosynthesis protein ThiC [Uniprot/SPTREMBL Acc. A0A103Y6K3]	-1.81569	8.65849e-30	4.58757e-28	32.6594	9.96373
Ccrd_000911	Abhydrolase_3 domain-containing protein [Uniprot/SPTREMBL Acc. A0A103XU74]	-1.81442	4.10012e-07	2.6083e-06	2.95459	0.902335
Ccrd_005932		-1.81396	0.000240103	0.000897958	0.547032	0.157321
Ccrd_001687	Shikimate kinase [Uniprot/SPTREMBL Acc. A0A118JXP2]	-1.81287	2.55196e-17	5.40551e-16	12.2243	3.69921
Ccrd_018439	Ammonium transporter [Uniprot/SPTREMBL Acc. A0A103Y673]	-1.81239	3.40834e-15	5.85381e-14	106.854	32.8117
Ccrd_004369	4-coumarate--CoA ligase [Uniprot/SPTREMBL Acc. A0A103XMJ2]	-1.81169	8.60785e-23	2.78373e-21	22.3299	6.78471
Ccrd_012605	AB hydrolase-1 domain-containing protein [Uniprot/SPTREMBL Acc. A0A103YH77]	-1.81138	4.18563e-11	4.66547e-10	15.864	4.79876
Ccrd_026603	Apple-like protein [Uniprot/SPTREMBL Acc. A0A103MM20]	-1.80956	0.00203847	0.00601037	0.532406	0.153261
Ccrd_015108	50S ribosomal protein L31 [Uniprot/SPTREMBL Acc. A0A103YCJ0]	-1.80816	4.37567e-08	3.29009e-07	202.979	63.7881
Ccrd_015074	DUF862 domain-containing protein [Uniprot/SPTREMBL Acc. A0A118K3V0]	-1.8076	5.60268e-22	1.71712e-20	14.5172	4.47533
Ccrd_023492		-1.8059	3.20464e-07	2.07412e-06	17.976	5.62913
Ccrd_024197	Transcription repressor [Uniprot/SPTREMBL Acc. A0A103D5G1]	-1.80525	1.30397e-12	1.71781e-11	22.1529	6.88189
Ccrd_009380		-1.80501	1.53838e-19	3.99876e-18	19.5578	5.95473
Ccrd_000308	Aa_trans domain-containing protein [Uniprot/SPTREMBL Acc. A0A118JYJ9]	-1.7965	0.000403652	0.00142919	7.93113	2.33718
Ccrd_003469		-1.79576	3.06065e-05	0.000137843	2.16659	0.643329
Ccrd_000810	TAFII28 domain-containing protein [Uniprot/SPTREMBL Acc. A0A124SDJ1]	-1.79513	1.39709e-06	8.06757e-06	8.13445	2.47552
Ccrd_002833	FA_desaturase domain-containing protein [Uniprot/SPTREMBL Acc. A0A103XQQ3]	-1.79106	9.62145e-18	2.13627e-16	49.0159	15.2271
Ccrd_004945	Histone H2A [Uniprot/SPTREMBL Acc. A0A103XLL6]	-1.79064	2.04675e-26	8.58614e-25	96.7116	29.9412
Ccrd_018965	Homeobox domain-containing protein [Uniprot/SPTREMBL Acc. A0A103Y578]	-1.78899	1.94168e-08	1.52705e-07	8.24885	2.50721
Ccrd_022871	Calmodulin binding protein-like protein [Uniprot/SPTREMBL Acc. A0A118JYZ9]	-1.78851	2.9264e-05	0.000132476	2.85809	0.875492
Ccrd_007080	PDZ domain-containing protein [Uniprot/SPTREMBL Acc. A0A118JU51]	-1.78486	2.73383e-18	6.40843e-17	10.1108	3.12312
Ccrd_018253		-1.78337	1.34476e-25	5.26444e-24	730.038	227.751
Ccrd_018243	Cys/Met metabolism, pyridoxal phosphate-dependent enzyme [Uniprot/SPTREMBL Acc. A0A103Y6K0]	-1.78332	1.93288e-12	2.50033e-11	7.81932	2.40356
Ccrd_012596		-1.77791	0.000161739	0.000628087	25.764	8.36039
Ccrd_002423	Adenine phosphoribosyltransferase [Uniprot/SPTREMBL Acc. A0A124SD14]	-1.77647	1.28339e-12	1.69267e-11	16.6227	5.17016
Ccrd_007437	Uncharacterized protein [Uniprot/SPTREMBL Acc. A0A103XGV9]	-1.77504	0.00790347	0.0196434	0.735905	0.222881
Ccrd_012817	Dehydrin [Uniprot/SPTREMBL Acc. A0A118K5A8]	-1.77427	0.000392606	0.00139442	9.20989	2.87537
Ccrd_009587	ANK_REP_REGION domain-containing protein [Uniprot/SPTREMBL Acc. A0A118K7A7]	-1.76873	7.20098e-05	0.000300323	1.18078	0.371091
Ccrd_009431		-1.76612	2.92567e-20	8.08278e-19	19.7586	6.19141
Ccrd_000443	Cytochrome P450 [Uniprot/SPTREMBL Acc. A0A103XV53]	-1.76507	6.93026e-16	1.27279e-14	27.7213	8.64275
Ccrd_009637	HAD-like domain-containing protein [Uniprot/SPTREMBL Acc. A0A103YMW5]	-1.76496	2.38209e-14	3.72109e-13	14.08	4.37801
Ccrd_005851	Glutamate receptor [Uniprot/SPTREMBL Acc. A0A103XJV6]	-1.76406	1.92456e-11	2.21806e-10	3.84591	1.19969
Ccrd_020327		-1.76289	0.00121518	0.00380942	3.30128	1.00667
Ccrd_011710	WIYLD domain-containing protein [Uniprot/SPTREMBL Acc. A0A103YIU6]	-1.76149	0.000877369	0.00284593	1.9024	0.601783
Ccrd_010125	Reticulon-like protein [Uniprot/SPTREMBL Acc. A0A118K706]	-1.75918	3.27508e-14	5.05885e-13	18.7205	5.87599
Ccrd_008822	3-phosphoshikimate 1-carboxyvinyltransferase [Uniprot/SPTREMBL Acc. A0A103XEB4]	-1.75807	4.20625e-18	9.68389e-17	124.9	39.2485
Ccrd_002848	AB hydrolase-1 domain-containing protein [Uniprot/SPTREMBL Acc. A0A103XQN1]	-1.75752	5.37229e-21	1.55531e-19	11.7396	3.68504
Ccrd_011056	Glyco_transf_20 domain-containing protein [Uniprot/SPTREMBL Acc. A0A118K6E3]	-1.75663	0.0148044	0.03383	0.796363	0.22604
Ccrd_009287	UDPGT domain-containing protein [Uniprot/SPTREMBL Acc. A0A118K7I5]	-1.75565	0.00268873	0.00766697	5.04857	1.57434
Ccrd_009297	Mitochondrial inner membrane translocase subunit Tim17/Tim22/Tim23/peroxisomal protein PMP24 [Uniprot/SPTREMBL Acc. A0A103YNG3]	-1.75562	1.43117e-18	3.42967e-17	35.5754	11.3764
Ccrd_009400	RHOMBOID-like protein [Uniprot/SPTREMBL Acc. A0A103YN59]	-1.75439	1.11992e-27	5.13225e-26	105.866	33.6035
Ccrd_005093	C2 NT-type domain-containing protein [Uniprot/SPTREMBL Acc. A0A103XLD6]	-1.75379	7.02965e-14	1.04253e-12	8.1494	2.56998
Ccrd_009375		-1.75302	7.94315e-24	2.75786e-22	61.9484	19.7846
Ccrd_022051	Phospho-2-dehydro-3-deoxyheptonate aldolase [Uniprot/SPTREMBL Acc. A0A118JZL1]	-1.74931	1.40947e-23	4.81585e-22	229.546	72.7749
Ccrd_017476	FTCD_N domain-containing protein [Uniprot/SPTREMBL Acc. A0A103Y804]	-1.74777	4.30894e-10	4.27995e-09	3.16294	0.989
Ccrd_015124	Cysteine peptidase, asparagine active site-containing protein [Uniprot/SPTREMBL Acc. A0A103YCE9]	-1.74765	2.77049e-18	6.48651e-17	513.228	162.857
Ccrd_017083		-1.74578	1.12888e-07	7.93005e-07	3.42109	1.08189
Ccrd_010583	H(+)-exporting diphosphatase [Uniprot/SPTREMBL Acc. A0A103YL04]	-1.74375	2.59775e-18	6.11165e-17	39.6604	12.7933
Ccrd_024938	Ribosomal_S7 domain-containing protein [Uniprot/SPTREMBL Acc. A0A124SAK3]	-1.74126	5.34523e-07	3.32277e-06	8.27598	2.60405
Ccrd_023429	Receptor-like serine/threonine-protein kinase [Uniprot/SPTREMBL Acc. A0A103XWW8]	-1.74089	1.80765e-08	1.43037e-07	3.62614	1.14179
Ccrd_017869	Thiolase [Uniprot/SPTREMBL Acc. A0A103Y7A3]	-1.74077	2.16155e-17	4.61393e-16	30.6486	9.70644
Ccrd_010412	Protein kinase domain-containing protein [Uniprot/SPTREMBL Acc. A0A103YL70]	-1.73915	5.25544e-22	1.61582e-20	18.4009	5.85628
Ccrd_009277	Cytochrome b5 heme-binding domain-containing protein [Uniprot/SPTREMBL Acc. A0A103YNF2]	-1.73879	5.36614e-12	6.60151e-11	165.05	52.9247
Ccrd_005125		-1.73701	0.0144182	0.0330724	3.2222	1.0327
Ccrd_010582	FAD-dependent pyridine nucleotide-disulfide oxidoreductase [Uniprot/SPTREMBL Acc. A0A124SHY6]	-1.73533	2.8364e-16	5.42026e-15	6.23211	1.98985
Ccrd_013752	Cyclic nucleotide-binding domain-containing protein [Uniprot/SPTREMBL Acc. A0A103YF01]	-1.73527	0.000586483	0.00199227	0.421978	0.133506
Ccrd_018051	RING-CH-type domain-containing protein [Uniprot/SPTREMBL Acc. A0A103Y6Z1]	-1.73398	0.00133222	0.00412881	2.49799	0.803492
Ccrd_023111	WRKY domain-containing protein [Uniprot/SPTREMBL Acc. A0A103XXK2]	-1.73378	6.20266e-15	1.03856e-13	40.8225	12.9878
Ccrd_019049	Dof-type domain-containing protein [Uniprot/SPTREMBL Acc. A0A103Y512]	-1.73305	0.00720862	0.018171	1.6974	0.552154
Ccrd_018579	RING-type domain-containing protein [Uniprot/SPTREMBL Acc. A0A103Y5Y6]	-1.73271	6.68609e-18	1.51763e-16	36.4034	11.7876
Ccrd_012615	Caffeoyl-CoA O-methyltransferase [Uniprot/SPTREMBL Acc. A0A103YH46]	-1.73144	5.46742e-18	1.24687e-16	44.9366	14.3566
Ccrd_014998	Heme peroxidase [Uniprot/SPTREMBL Acc. A0A103YCN8]	-1.73137	4.61441e-10	4.56503e-09	10.1481	3.30319
Ccrd_011385		-1.73089	1.09199e-17	2.41625e-16	37.1413	11.9115
Ccrd_025178	alpha-1,2-Mannosidase [Uniprot/SPTREMBL Acc. A0A103XB99]	-1.72778	8.63569e-18	1.92625e-16	34.8653	11.1005
Ccrd_023578	Protein kinase domain-containing protein [Uniprot/SPTREMBL Acc. A0A103XWL6]	-1.72686	1.34371e-07	9.28735e-07	9.00108	2.90525
Ccrd_019811		-1.72628	3.25893e-20	8.93965e-19	112.088	36.318
Ccrd_026150	CASP-like protein [Uniprot/SPTREMBL Acc. A0A118JSR8]	-1.72496	2.62097e-23	8.81513e-22	37.9336	12.2934
Ccrd_018238	Protein kinase domain-containing protein [Uniprot/SPTREMBL Acc. A0A118K1W1]	-1.7248	2.82745e-17	5.95644e-16	293.895	95.0865
Ccrd_003910		-1.72336	4.17809e-15	7.12522e-14	243.841	79.2004
Ccrd_014209		-1.72191	0.000182095	0.000699411	1.27493	0.400258
Ccrd_007280	ATP-dependent 6-phosphofructokinase [Uniprot/SPTREMBL Acc. A0A124SBH6]	-1.72173	2.0712e-07	1.38503e-06	2.25777	0.739322
Ccrd_003595		-1.72105	2.35699e-18	5.552e-17	87.7398	28.7592
Ccrd_002463		-1.72043	7.27525e-12	8.8266e-11	100.772	32.8146
Ccrd_009395	BZIP domain-containing protein [Uniprot/SPTREMBL Acc. A0A103YN52]	-1.71983	1.38095e-15	2.4728e-14	16.8506	5.42831
Ccrd_005751		-1.71468	1.23677e-23	4.24829e-22	69.57	22.6369
Ccrd_002113	23 kDa subunit of oxygen evolving system of photosystem II [Uniprot/SPTREMBL Acc. A0A103XS45]	-1.71421	5.50866e-09	4.75083e-08	15.1717	4.9833
Ccrd_010386	CASP-like protein [Uniprot/SPTREMBL Acc. A0A103YLC5]	-1.71398	6.37539e-05	0.000269318	9.65316	3.20805
Ccrd_007862	LEA_2 domain-containing protein [Uniprot/SPTREMBL Acc. A0A118JTY9]	-1.7136	0.00269408	0.00768064	3.08662	1.016
Ccrd_014021	Oligopeptide transporter OPT superfamily [Uniprot/SPTREMBL Acc. A0A103YEK3]	-1.71278	2.5991e-16	4.9865e-15	313.784	100.989
Ccrd_005044		-1.71083	0.000966303	0.00310318	2.46476	0.773898
Ccrd_005119	Succinate dehydrogenase [ubiquinone] iron-sulfur subunit, mitochondrial [Uniprot/SPTREMBL Acc. A0A124SC61]	-1.70898	4.71274e-14	7.10365e-13	324.009	107.275
Ccrd_014685	Peptidase A1 domain-containing protein [Uniprot/SPTREMBL Acc. A0A118K440]	-1.70851	1.65688e-16	3.22358e-15	15.6039	5.14306
Ccrd_011979	HMA domain-containing protein [Uniprot/SPTREMBL Acc. A0A103YIB9]	-1.70848	4.56712e-19	1.14289e-17	39.0034	12.8538
Ccrd_022935	Cyclin N-terminal domain-containing protein [Uniprot/SPTREMBL Acc. A0A103XXX5]	-1.70843	0.0172533	0.0385869	1.78582	0.556143
Ccrd_008434	Protein kinase domain-containing protein [Uniprot/SPTREMBL Acc. A0A118JTA7]	-1.70793	1.75138e-06	9.94417e-06	6.29829	2.05028
Ccrd_009393		-1.70676	2.25546e-21	6.64915e-20	242.544	79.5699
Ccrd_011078	Choline transporter-like protein [Uniprot/SPTREMBL Acc. A0A103YJX4]	-1.70614	3.9583e-27	1.72409e-25	61.7366	20.1814
Ccrd_026741	Calcium-transporting ATPase [Uniprot/SPTREMBL Acc. A0A103XD00]	-1.70608	3.92019e-16	7.36759e-15	123.472	40.3499
Ccrd_016297		-1.70607	0.00265803	0.00759173	2.11015	0.70659
Ccrd_008476	RING-type domain-containing protein [Uniprot/SPTREMBL Acc. A0A103XF23]	-1.70263	6.0504e-07	3.72165e-06	5.6571	1.84313
Ccrd_018416		-1.70263	2.66991e-07	1.7491e-06	2.29571	0.742127
Ccrd_005389	BTB/POZ-like protein [Uniprot/SPTREMBL Acc. A0A103XKP3]	-1.70172	6.08417e-12	7.44695e-11	6.2075	2.01328
Ccrd_009097	Uncharacterized protein [Uniprot/SPTREMBL Acc. A0A103YNQ8]	-1.70039	3.94901e-18	9.11335e-17	305.288	101.615
Ccrd_019029	Protein kinase domain-containing protein [Uniprot/SPTREMBL Acc. A0A103Y535]	-1.70015	4.59717e-20	1.24342e-18	22.1208	7.24648
Ccrd_005889	Twin-arginine translocation protein TatA/B/E [Uniprot/SPTREMBL Acc. A0A118JUT7]	-1.69966	1.23813e-07	8.63162e-07	133.014	43.2366
Ccrd_009598	Ribosomal protein S8 [Uniprot/SPTREMBL Acc. A0A124SI94]	-1.69943	2.42884e-11	2.77117e-10	240.416	80.9444
Ccrd_007309	Uncharacterized protein [Uniprot/SPTREMBL Acc. A0A118JTX6]	-1.6987	2.02373e-07	1.35657e-06	4.97981	1.62678
Ccrd_008790		-1.69763	4.33959e-09	3.8026e-08	24.2661	8.08511
Ccrd_025623	Uncharacterized protein [Uniprot/SPTREMBL Acc. A0A103W890]	-1.69734	0.000488408	0.00169211	2.08622	0.665161
Ccrd_019093	Protein kinase domain-containing protein [Uniprot/SPTREMBL Acc. A0A118K1B6]	-1.69536	7.52649e-12	9.11427e-11	5.09268	1.67601
Ccrd_021568	Peptidoglycan-binding lysin domain-containing protein [Uniprot/SPTREMBL Acc. A0A118JZP2]	-1.69452	0.00196655	0.00582494	1.51433	0.485188
Ccrd_012664		-1.69209	2.73545e-06	1.49946e-05	31.942	10.1942
Ccrd_011155	Rieske domain-containing protein [Uniprot/SPTREMBL Acc. A0A103YJT1]	-1.68808	1.37172e-07	9.46404e-07	19.3372	6.5239
Ccrd_005090	Ribulose-phosphate 3-epimerase [Uniprot/SPTREMBL Acc. A0A124SC60]	-1.68807	4.56515e-23	1.50915e-21	138.597	46.292
Ccrd_008817	Auxin responsive SAUR protein [Uniprot/SPTREMBL Acc. A0A103XEF0]	-1.68457	1.27566e-09	1.19204e-08	75.4054	25.6123
Ccrd_004390		-1.68402	4.62473e-12	5.76273e-11	91.428	30.2779
Ccrd_002017	Phospho-2-dehydro-3-deoxyheptonate aldolase [Uniprot/SPTREMBL Acc. A0A103XS42]	-1.68392	3.1436e-08	2.40864e-07	7.59339	2.51973
Ccrd_001781	UAA transporter [Uniprot/SPTREMBL Acc. A0A103XSM0]	-1.68356	6.441e-11	7.0414e-10	15.6181	5.12392
Ccrd_020422		-1.68117	0.000167587	0.000648711	3.75895	1.28304
Ccrd_009343	Ubiquitin-related modifier 1 homolog [Uniprot/SPTREMBL Acc. A0A103YN58]	-1.6804	9.69908e-26	3.8358e-24	45.1561	15.055
Ccrd_009607		-1.67856	1.0984e-16	2.17517e-15	239.635	80.8635
Ccrd_009432	Proteasome Inhibitor PI31 [Uniprot/SPTREMBL Acc. A0A103YN45]	-1.67732	1.70414e-12	2.21183e-11	33.7365	11.4825
Ccrd_003014	Peroxidase [Uniprot/SPTREMBL Acc. A0A103XQC3]	-1.6755	0.00204859	0.00603651	0.65635	0.209493
Ccrd_004016	Aquaporin-like protein [Uniprot/SPTREMBL Acc. A0A103XNC2]	-1.67335	0.00859771	0.0211487	0.468021	0.148392
Ccrd_004729	Pectinesterase [Uniprot/SPTREMBL Acc. A0A118JUY1]	-1.67329	3.43588e-08	2.62531e-07	4.95939	1.63229
Ccrd_013539	Chitin-binding type-1 domain-containing protein [Uniprot/SPTREMBL Acc. A0A103YFE0]	-1.67092	1.48912e-08	1.19444e-07	51.7773	17.4428
Ccrd_010124	Uncharacterized protein [Uniprot/SPTREMBL Acc. A0A103YLU7]	-1.67047	0.0102391	0.0246511	0.504943	0.169596
Ccrd_001987		-1.66913	1.88538e-06	1.06363e-05	811.356	277.673
Ccrd_005537	Protein DETOXIFICATION [Uniprot/SPTREMBL Acc. A0A103XKQ1]	-1.66779	2.26297e-09	2.04694e-08	5.73734	1.9537
Ccrd_000286	Aspergillus nuclease S(1) [Uniprot/SPTREMBL Acc. A0A103XVE6]	-1.66532	3.04997e-14	4.73002e-13	72.5954	24.3841
Ccrd_010692		-1.66498	1.5017e-26	6.35479e-25	136.902	46.3445
Ccrd_018121	RECA_2 domain-containing protein [Uniprot/SPTREMBL Acc. A0A103Y6U3]	-1.66341	5.8936e-07	3.63329e-06	13.955	4.58747
Ccrd_016477	Aldolase-type TIM barrel [Uniprot/SPTREMBL Acc. A0A103Y9S7]	-1.66311	1.62012e-08	1.29362e-07	16.7175	5.68953
Ccrd_016029	BHLH domain-containing protein [Uniprot/SPTREMBL Acc. A0A124SG83]	-1.66166	0.0121618	0.0286407	1.1269	0.359942
Ccrd_017488	Chloramphenicol acetyltransferase-like domain-containing protein [Uniprot/SPTREMBL Acc. A0A124SFT2]	-1.66122	2.57205e-14	4.00813e-13	30.1349	10.1606
Ccrd_005491		-1.65905	6.31763e-05	0.000267228	51.4693	18.2769
Ccrd_010539	Uncharacterized protein [Uniprot/SPTREMBL Acc. A0A118K6R3]	-1.6587	5.83231e-15	9.81646e-14	73.0132	24.9899
Ccrd_010668		-1.65785	1.23219e-11	1.46102e-10	2.30413	0.78185
Ccrd_012070		-1.65743	1.79658e-07	1.21313e-06	2.19813	0.72988
Ccrd_010594	Protein disulfide-isomerase [Uniprot/SPTREMBL Acc. A0A103YKU6]	-1.65653	4.38164e-18	1.00399e-16	40.4513	13.8026
Ccrd_009894	Monogalactosyldiacylglycerol synthase [Uniprot/SPTREMBL Acc. A0A103YM37]	-1.65548	0.000190703	0.000729141	1.15395	0.390372
Ccrd_010155	J domain-containing protein [Uniprot/SPTREMBL Acc. A0A103YLM6]	-1.65387	7.42228e-09	6.25444e-08	7.03712	2.36473
Ccrd_016464	Calcium-binding EF-hand [Uniprot/SPTREMBL Acc. A0A103Y9V8]	-1.65314	0.00184389	0.00550209	0.430073	0.139393
Ccrd_005322	Protein kinase domain-containing protein [Uniprot/SPTREMBL Acc. A0A103XKT8]	-1.65281	2.29221e-07	1.52072e-06	2.57774	0.869788
Ccrd_005798	CMP/dCMP-type deaminase domain-containing protein [Uniprot/SPTREMBL Acc. A0A118JUA8]	-1.65243	9.88597e-23	3.18111e-21	128.13	43.9257
Ccrd_003029		-1.64973	1.08075e-10	1.15473e-09	20.6197	7.05874
Ccrd_007091		-1.64829	2.88455e-15	5.00756e-14	73.9828	25.2928
Ccrd_006791	AT-hook motif nuclear-localized protein [Uniprot/SPTREMBL Acc. A0A103XID3]	-1.64801	6.11686e-15	1.02508e-13	9.50025	3.24359
Ccrd_018204	Protein kinase domain-containing protein [Uniprot/SPTREMBL Acc. A0A103Y6M8]	-1.64621	1.65384e-10	1.73541e-09	33.4625	11.4605
Ccrd_020552	FAD-binding PCMH-type domain-containing protein [Uniprot/SPTREMBL Acc. A0A118K0U0]	-1.64502	0.00779692	0.019431	0.483371	0.169682
Ccrd_002937	TPT domain-containing protein [Uniprot/SPTREMBL Acc. A0A103XQM2]	-1.64457	1.67307e-15	2.97386e-14	14.0438	4.81754
Ccrd_001398		-1.64435	8.08467e-10	7.75543e-09	17.099	5.92026
Ccrd_009615	Uncharacterized protein [Uniprot/SPTREMBL Acc. A0A103YMU3]	-1.64419	8.43061e-12	1.0133e-10	15.4862	5.3078
Ccrd_010019	Malic enzyme, NAD-binding [Uniprot/SPTREMBL Acc. A0A118K728]	-1.64366	1.27802e-21	3.82595e-20	201.315	69.2721
Ccrd_025498		-1.64318	2.31482e-22	7.27907e-21	32.0452	10.9695
Ccrd_018681	LEA_2 domain-containing protein [Uniprot/SPTREMBL Acc. A0A103Y5R4]	-1.64243	1.50588e-13	2.17655e-12	224.354	77.8897
Ccrd_011949	Dual specificity phosphatase, catalytic domain-containing protein [Uniprot/SPTREMBL Acc. A0A103YID0]	-1.64175	4.99081e-05	0.000215392	2.89195	0.988005
Ccrd_008728		-1.64132	1.76591e-24	6.41934e-23	108.119	37.0034
Ccrd_009411	Calmodulin [Uniprot/SPTREMBL Acc. A0A118K7G3]	-1.64033	7.37991e-18	1.6634e-16	757.519	262.92
Ccrd_010613	LEA_2 domain-containing protein [Uniprot/SPTREMBL Acc. A0A103YKY1]	-1.63996	8.05047e-06	4.06178e-05	6.05989	2.09873
Ccrd_011846		-1.63867	2.2076e-06	1.23247e-05	5.29436	1.83971
Ccrd_019882	GTP cyclohydrolase II [Uniprot/SPTREMBL Acc. A0A103Y3J1]	-1.63825	1.06427e-10	1.13838e-09	3.94574	1.36388
Ccrd_009867		-1.63699	4.09731e-13	5.61572e-12	14.8057	5.09654
Ccrd_008788		-1.63656	9.58002e-08	6.80632e-07	4.69929	1.58744
Ccrd_018927		-1.63653	5.335e-10	5.2267e-09	22.479	7.83357
Ccrd_005237	UBC core domain-containing protein [Uniprot/SPTREMBL Acc. A0A103XL31]	-1.63503	3.12528e-17	6.56242e-16	239.42	83.2445
Ccrd_004305		-1.63385	7.36153e-05	0.00030649	3.50369	1.19624
Ccrd_004366	Abhydrolase_3 domain-containing protein [Uniprot/SPTREMBL Acc. A0A124SCF0]	-1.63377	1.03188e-18	2.50416e-17	344.724	120.009
Ccrd_026182	Small GTPase superfamily [Uniprot/SPTREMBL Acc. A0A103S8Y2]	-1.63369	3.3981e-11	3.81404e-10	28.8423	9.96342
Ccrd_009731	Peptidase S8A, DUF1034 C-terminal [Uniprot/SPTREMBL Acc. A0A124SI79]	-1.63263	2.02608e-19	5.19661e-18	38.8246	13.3516
Ccrd_009355	Ribosomal protein L18a [Uniprot/SPTREMBL Acc. A0A103YN91]	-1.63029	8.63653e-11	9.33477e-10	13.3159	4.61143
Ccrd_000963		-1.62715	6.23449e-05	0.000264116	4.88521	1.70315
Ccrd_009707		-1.62714	7.34181e-10	7.08146e-09	4.69674	1.6333
Ccrd_013217	AP2/ERF domain-containing protein [Uniprot/SPTREMBL Acc. A0A103YG11]	-1.62707	6.70509e-06	3.4277e-05	7.14563	2.47865
Ccrd_015649		-1.62653	6.10716e-14	9.13429e-13	17.4131	6.05634
Ccrd_016725		-1.62537	2.5789e-05	0.000118016	103.636	37.5855
Ccrd_015191	O-phosphoserine phosphohydrolase [Uniprot/SPTREMBL Acc. A0A103YCB6]	-1.62438	7.97708e-17	1.60362e-15	55.5599	19.2545
Ccrd_016025		-1.62378	3.54969e-12	4.47506e-11	36.3844	12.6098
Ccrd_001292	MSP domain-containing protein [Uniprot/SPTREMBL Acc. A0A103XTK8]	-1.62359	1.37903e-10	1.45892e-09	21.5678	7.51182
Ccrd_008962	zinc_ribbon_12 domain-containing protein [Uniprot/SPTREMBL Acc. A0A103XEA9]	-1.62326	0.00202113	0.00596741	0.978437	0.33671
Ccrd_000035		-1.62287	0.000677898	0.0022705	2.36226	0.842849
Ccrd_020601		-1.62184	0.000296218	0.0010827	1.49527	0.509745
Ccrd_012777	Uncharacterized protein [Uniprot/SPTREMBL Acc. A0A103YGU9]	-1.62104	1.42275e-08	1.14454e-07	8.38425	2.95648
Ccrd_017895	Uncharacterized protein [Uniprot/SPTREMBL Acc. A0A124SFP0]	-1.62002	7.08906e-11	7.71499e-10	12.1827	4.18095
Ccrd_023185	NAD(P)-binding domain-containing protein [Uniprot/SPTREMBL Acc. A0A118JYY7]	-1.61964	1.33146e-08	1.0782e-07	18.404	6.29082
Ccrd_011236	Phytocyanin domain-containing protein [Uniprot/SPTREMBL Acc. A0A118K6B2]	-1.61913	0.00417816	0.0113056	1.49817	0.483207
Ccrd_003067	Lectin_legB domain-containing protein [Uniprot/SPTREMBL Acc. A0A103XQB3]	-1.6188	9.2698e-11	9.99267e-10	8.83127	3.03743
Ccrd_022009	Wall-associated receptor kinase galacturonan-binding domain-containing protein [Uniprot/SPTREMBL Acc. A0A103XZI6]	-1.61874	5.20812e-07	3.24484e-06	6.42424	2.25557
Ccrd_020802	Transcription repressor [Uniprot/SPTREMBL Acc. A0A103Y1S5]	-1.61826	0.000539985	0.00185188	2.87176	0.98298
Ccrd_003120	Gb3_synth domain-containing protein [Uniprot/SPTREMBL Acc. A0A103XQ29]	-1.6174	0.00337887	0.00936831	2.18462	0.740116
Ccrd_017014	CCT domain-containing protein [Uniprot/SPTREMBL Acc. A0A118K2N2]	-1.61661	3.85898e-10	3.86878e-09	17.4527	6.05803
Ccrd_008010	UDP-glucuronosyl/UDP-glucosyltransferase [Uniprot/SPTREMBL Acc. A0A118JT17]	-1.61571	2.9525e-15	5.12093e-14	12.2611	4.29038
Ccrd_010164	EGF-like calcium-binding [Uniprot/SPTREMBL Acc. A0A103YLR4]	-1.61499	2.7046e-11	3.0659e-10	17.1004	5.88779
Ccrd_015289	Uncharacterized protein [Uniprot/SPTREMBL Acc. A0A103YC36]	-1.61473	2.31446e-14	3.63011e-13	119.547	41.6142
Ccrd_004804		-1.6138	9.42704e-14	1.38323e-12	48.4542	17.0038
Ccrd_023401	Hexosyltransferase [Uniprot/SPTREMBL Acc. A0A103XWV0]	-1.61343	1.21061e-06	7.06246e-06	112.686	40.4226
Ccrd_010655	Trimethylguanosine synthase [Uniprot/SPTREMBL Acc. A0A103YKR3]	-1.61295	3.09147e-05	0.000139134	2.89431	0.986198
Ccrd_004559		-1.61275	9.84287e-06	4.8808e-05	0.940426	0.325029
Ccrd_000872	Pyr_redox_2 domain-containing protein [Uniprot/SPTREMBL Acc. A0A103XUD5]	-1.61257	0.00608325	0.0156984	0.820542	0.299991
Ccrd_007122	Serine/threonine-protein phosphatase [Uniprot/SPTREMBL Acc. A0A124SBJ7]	-1.61165	3.63928e-18	8.42875e-17	171.661	60.4078
Ccrd_010358		-1.61121	2.11412e-13	3.00845e-12	5.26452	1.86221
Ccrd_020603	Oligopeptide transporter OPT superfamily [Uniprot/SPTREMBL Acc. A0A103Y246]	-1.6112	4.0039e-25	1.50938e-23	62.2273	21.7665
Ccrd_009525	Isochorismatase domain-containing protein [Uniprot/SPTREMBL Acc. A0A118K7C4]	-1.61109	1.33023e-11	1.56575e-10	49.6727	17.5306
Ccrd_001341	PBPe domain-containing protein [Uniprot/SPTREMBL Acc. A0A103XTJ4]	-1.61093	5.02808e-05	0.000216856	1.20057	0.410313
Ccrd_007082	Uncharacterized protein [Uniprot/SPTREMBL Acc. A0A103XHU2]	-1.61067	1.41919e-12	1.86198e-11	28.8638	10.0521
Ccrd_012042		-1.61009	7.67949e-07	4.65706e-06	5.81764	2.023
Ccrd_015556	4-coumarate--CoA ligase [Uniprot/SPTREMBL Acc. A0A118K3K7]	-1.60874	1.63053e-15	2.90358e-14	97.512	33.8785
Ccrd_007381		-1.6075	0.00666161	0.016978	0.496565	0.167427
Ccrd_005727	Uncharacterized protein [Uniprot/SPTREMBL Acc. A0A103XK92]	-1.60668	1.71862e-20	4.82385e-19	60.8033	21.4939
Ccrd_009621	SHSP domain-containing protein [Uniprot/SPTREMBL Acc. A0A103YMV5]	-1.60642	8.61862e-10	8.22682e-09	49.4165	17.2661
Ccrd_009861	Proteolipid membrane potential modulator [Uniprot/SPTREMBL Acc. A0A103YMC1]	-1.60489	7.48837e-16	1.36879e-14	73.3194	26.0466
Ccrd_017390	Protein kinase domain-containing protein [Uniprot/SPTREMBL Acc. A0A103Y872]	-1.60451	1.2631e-13	1.83939e-12	6.0551	2.11221
Ccrd_018180	Protein-serine/threonine phosphatase [Uniprot/SPTREMBL Acc. A0A103Y6M0]	-1.6028	9.9069e-06	4.90784e-05	3.30973	1.1551
Ccrd_019042	Protein kinase domain-containing protein [Uniprot/SPTREMBL Acc. A0A118K1C4]	-1.60093	8.00835e-10	7.68603e-09	7.2779	2.54976
Ccrd_009781	Uncharacterized protein [Uniprot/SPTREMBL Acc. A0A103YMA9]	-1.60064	6.21596e-17	1.26271e-15	10.3147	3.62834
Ccrd_025127	Aa_trans domain-containing protein [Uniprot/SPTREMBL Acc. A0A118JRV5]	-1.59883	0.00403181	0.0109449	0.709645	0.248465
Ccrd_011531	Protein kinase domain-containing protein [Uniprot/SPTREMBL Acc. A0A118K637]	-1.5982	1.72915e-07	1.17005e-06	2.46534	0.869017
Ccrd_019395		-1.59719	0.00111003	0.00351456	0.444489	0.152179
Ccrd_004493	Glycosyl transferase, family 14 [Uniprot/SPTREMBL Acc. A0A124SCD6]	-1.59437	0.00013635	0.000537809	1.58024	0.556867
Ccrd_005595		-1.59427	1.1531e-13	1.68442e-12	41.0752	14.4128
Ccrd_002512	Glutathione peroxidase [Uniprot/SPTREMBL Acc. A0A124SCZ9]	-1.594	1.904e-18	4.51244e-17	984.617	348.406
Ccrd_003432	PlsC domain-containing protein [Uniprot/SPTREMBL Acc. A0A103XPP1]	-1.59176	1.40313e-17	3.06613e-16	14.1422	4.9867
Ccrd_018537		-1.59141	3.07522e-16	5.87085e-15	14.3922	5.0695
Ccrd_006308	Uncharacterized protein [Uniprot/SPTREMBL Acc. A0A103XJ71]	-1.59118	1.1859e-08	9.70965e-08	4.40614	1.53765
Ccrd_003452		-1.59109	5.02621e-20	1.35002e-18	118.057	42.2975
Ccrd_025169	LRRNT_2 domain-containing protein [Uniprot/SPTREMBL Acc. A0A124SAH9]	-1.58934	7.30783e-15	1.2131e-13	10.3265	3.6823
Ccrd_016763	Expansin [Uniprot/SPTREMBL Acc. A0A118K2U1]	-1.58791	0.000206554	0.000783091	4.02157	1.41416
Ccrd_005224	Glycosyl transferase, family 14 [Uniprot/SPTREMBL Acc. A0A103XL58]	-1.58704	4.56827e-19	1.14289e-17	62.9191	22.6443
Ccrd_008435		-1.5868	0.00154174	0.00471096	4.65415	1.5832
Ccrd_006921	Peptidase A1 domain-containing protein [Uniprot/SPTREMBL Acc. A0A124SBL9]	-1.586	1.69587e-10	1.7747e-09	250.208	91.0334
Ccrd_017522	Chloramphenicol acetyltransferase-like domain-containing protein [Uniprot/SPTREMBL Acc. A0A124SFS4]	-1.58536	2.09383e-22	6.59487e-21	44.774	15.9695
Ccrd_016862	Peroxidase [Uniprot/SPTREMBL Acc. A0A118K2S6]	-1.58529	4.14502e-15	7.08133e-14	16.625	5.88667
Ccrd_019667	Fe2OG dioxygenase domain-containing protein [Uniprot/SPTREMBL Acc. A0A103Y3Y7]	-1.5851	0.00143555	0.00441508	2.75379	0.958706
Ccrd_008606	DNA/RNA helicase, DEAD/DEAH box type, N-terminal [Uniprot/SPTREMBL Acc. A0A103XEW9]	-1.58489	0.00145012	0.00445425	1.76252	0.629769
Ccrd_009390	CASP-like protein [Uniprot/SPTREMBL Acc. A0A103YN63]	-1.57852	3.13439e-10	3.18361e-09	17.447	6.2171
Ccrd_019696		-1.57755	1.50221e-09	1.39268e-08	18.8613	6.79102
Ccrd_004642	Phosphoglycerate dehydrogenase [Uniprot/SPTREMBL Acc. A0A103XM67]	-1.57734	4.65276e-12	5.7902e-11	306.297	109.56
Ccrd_002339	Protein kinase domain-containing protein [Uniprot/SPTREMBL Acc. A0A124SD27]	-1.57543	1.67565e-06	9.55627e-06	2.33571	0.835435
Ccrd_015699	Uncharacterized protein [Uniprot/SPTREMBL Acc. A0A118K3H4]	-1.57528	0.000178993	0.000688589	6.76012	2.48123
Ccrd_017176		-1.57446	5.59146e-16	1.03576e-14	37.0333	13.3384
Ccrd_001420	Bet_v_1 domain-containing protein [Uniprot/SPTREMBL Acc. A0A118JXK8]	-1.57391	1.07034e-12	1.42165e-11	226.53	81.846
Ccrd_017323	Ribosomal_L2_C domain-containing protein [Uniprot/SPTREMBL Acc. A0A103Y8B7]	-1.57231	0.00708251	0.0179044	2.32045	0.792831
Ccrd_009336	Uncharacterized protein [Uniprot/SPTREMBL Acc. A0A103YNE1]	-1.57221	1.73977e-09	1.59381e-08	13.6828	4.96197
Ccrd_001977	Myb-like domain-containing protein [Uniprot/SPTREMBL Acc. A0A103XS84]	-1.57122	0.000227813	0.000855304	3.87395	1.36028
Ccrd_005560		-1.57102	4.7132e-15	7.99549e-14	22.9135	8.2843
Ccrd_017409	Uncharacterized protein [Uniprot/SPTREMBL Acc. A0A118K2E8]	-1.57072	3.03324e-14	4.70785e-13	87.1606	31.5489
Ccrd_005081		-1.5703	8.5016e-18	1.90292e-16	347.551	126.391
Ccrd_014650		-1.56959	0.00119344	0.00374919	3.08412	1.12247
Ccrd_009267	U6 snRNA-associated Sm-like protein LSm5 [Uniprot/SPTREMBL Acc. A0A103YNL6]	-1.56827	2.1011e-14	3.31158e-13	90.5485	32.9993
Ccrd_005073	Alpha-mannosidase [Uniprot/SPTREMBL Acc. A0A124SC70]	-1.56724	1.896e-18	4.49899e-17	33.1841	11.8552
Ccrd_004576		-1.56469	0.0159297	0.0360562	0.825406	0.305082
Ccrd_001401		-1.56394	1.70456e-06	9.70687e-06	10.8758	4.04032
Ccrd_009391	Aldo/keto reductase [Uniprot/SPTREMBL Acc. A0A124SIB7]	-1.56311	1.02411e-20	2.91253e-19	72.5582	26.4061
Ccrd_009572	PEROXIDASE_4 domain-containing protein [Uniprot/SPTREMBL Acc. A0A118K7B6]	-1.56199	3.95898e-16	7.43327e-15	2787.47	1016.51
Ccrd_017558	Auxin responsive SAUR protein [Uniprot/SPTREMBL Acc. A0A103Y7V5]	-1.56136	0.00896185	0.021925	2.28409	0.837424
Ccrd_002347	BTB/POZ-like protein [Uniprot/SPTREMBL Acc. A0A118JXK3]	-1.56072	6.78594e-08	4.93358e-07	3.66238	1.31679
Ccrd_005088	Lipase [Uniprot/SPTREMBL Acc. A0A124SC62]	-1.56035	1.84002e-18	4.37152e-17	26.601	9.63744
Ccrd_007106	O-fucosyltransferase family protein [Uniprot/SPTREMBL Acc. A0A124SBJ6]	-1.55936	3.92565e-14	5.97781e-13	24.927	8.9433
Ccrd_010484	Uncharacterized protein [Uniprot/SPTREMBL Acc. A0A103YL72]	-1.55923	1.08541e-11	1.29413e-10	453.185	167.195
Ccrd_022111	RSN1_TM domain-containing protein [Uniprot/SPTREMBL Acc. A0A103XZA7]	-1.55645	0.0006935	0.00231623	2.41512	0.844407
Ccrd_018741	3-hydroxy-3-methylglutaryl coenzyme A reductase [Uniprot/SPTREMBL Acc. A0A103Y5P0]	-1.5556	1.21264e-18	2.9241e-17	157.176	57.6813
Ccrd_005852	Mlo-related protein [Uniprot/SPTREMBL Acc. A0A103XJZ1]	-1.55524	4.26624e-18	9.81032e-17	28.5889	10.4388
Ccrd_009713	Auxin-responsive protein [Uniprot/SPTREMBL Acc. A0A118K7A1]	-1.55476	1.23213e-08	1.00583e-07	7.30167	2.63257
Ccrd_017589	Aldolase-type TIM barrel [Uniprot/SPTREMBL Acc. A0A103Y7U1]	-1.55407	2.0421e-20	5.67415e-19	142.05	52.03
Ccrd_009367	Protein kinase domain-containing protein [Uniprot/SPTREMBL Acc. A0A103YN68]	-1.55363	9.67748e-15	1.58739e-13	16.6877	6.07451
Ccrd_010685	Uncharacterized protein [Uniprot/SPTREMBL Acc. A0A103YKS6]	-1.55216	3.7597e-11	4.20282e-10	7.58524	2.77052
Ccrd_016022	BHLH domain-containing protein [Uniprot/SPTREMBL Acc. A0A124SG92]	-1.55181	0.00894034	0.0218913	0.742774	0.264592
Ccrd_014244		-1.55156	3.26629e-14	5.04931e-13	555.978	201.12
Ccrd_002527		-1.55123	3.80214e-13	5.24462e-12	37.5114	13.4848
Ccrd_009415	Uncharacterized protein [Uniprot/SPTREMBL Acc. A0A103YND3]	-1.55092	1.06137e-08	8.74805e-08	15.8183	5.77194
Ccrd_026224	AP2/ERF domain-containing protein [Uniprot/SPTREMBL Acc. A0A124RDC9]	-1.55026	0.00256644	0.00735622	0.594153	0.216812
Ccrd_000307	Aa_trans domain-containing protein [Uniprot/SPTREMBL Acc. A0A103XVD8]	-1.5498	2.10968e-06	1.18121e-05	10.7337	3.89676
Ccrd_010322		-1.54967	1.16524e-06	6.82657e-06	1.94723	0.721054
Ccrd_008270	NAC domain-containing protein [Uniprot/SPTREMBL Acc. A0A103XFH5]	-1.54925	1.65351e-07	1.12251e-06	10.2374	3.70308
Ccrd_010625	Uncharacterized protein [Uniprot/SPTREMBL Acc. A0A103YKZ7]	-1.54897	3.52288e-13	4.8768e-12	30.99	11.435
Ccrd_001360	Amino acid transporter, transmembrane [Uniprot/SPTREMBL Acc. A0A124SDD0]	-1.54884	4.49873e-21	1.30436e-19	19.5192	7.1135
Ccrd_012463	RING-type domain-containing protein [Uniprot/SPTREMBL Acc. A0A103YHA0]	-1.54666	4.2756e-08	3.22111e-07	5.32766	1.94244
Ccrd_024399	Uncharacterized protein [Uniprot/SPTREMBL Acc. A0A118JSG1]	-1.54648	5.25867e-06	2.75453e-05	8.49826	3.12936
Ccrd_022866	Xanthine/uracil/vitamin C permease [Uniprot/SPTREMBL Acc. A0A124SE46]	-1.54643	2.84341e-15	4.94059e-14	270.518	99.9391
Ccrd_013452		-1.54548	0.00859411	0.0211425	3.33785	1.21497
Ccrd_024973	Peptidyl-prolyl cis-trans isomerase [Uniprot/SPTREMBL Acc. A0A124SAK1]	-1.54422	1.72968e-19	4.47197e-18	16.7685	6.13583
Ccrd_018850		-1.54391	7.14392e-11	7.77032e-10	12.2592	4.46715
Ccrd_020415	Equilibrative nucleoside transporter [Uniprot/SPTREMBL Acc. A0A103Y2I6]	-1.54311	0.0171822	0.0384546	0.574165	0.194776
Ccrd_005492	N-acetyltransferase domain-containing protein [Uniprot/SPTREMBL Acc. A0A103XKN0]	-1.54291	0.000233719	0.000875406	11.6877	4.40229
Ccrd_005750	AA_kinase domain-containing protein [Uniprot/SPTREMBL Acc. A0A103XK32]	-1.54247	1.45101e-21	4.33709e-20	56.9867	20.9036
Ccrd_010720	Mg2+ transporter protein, CorA-like/Zinc transport protein ZntB [Uniprot/SPTREMBL Acc. A0A118K6L6]	-1.54099	3.53607e-18	8.20937e-17	33.1598	12.2981
Ccrd_005446		-1.54019	3.52724e-13	4.87934e-12	68.6728	25.6813
Ccrd_005249	Ribosomal_S4 domain-containing protein [Uniprot/SPTREMBL Acc. A0A118JUM4]	-1.53994	1.92551e-17	4.1329e-16	405.535	150.524
Ccrd_005550	BHLH domain-containing protein [Uniprot/SPTREMBL Acc. A0A103XKG5]	-1.53932	3.49647e-06	1.88142e-05	3.51019	1.26808
Ccrd_011397	Pectinesterase [Uniprot/SPTREMBL Acc. A0A103YJE0]	-1.53913	9.98003e-20	2.63307e-18	52.7657	19.4597
Ccrd_008961		-1.53838	0.00266969	0.00762392	4.57959	1.73617
Ccrd_009571	Protein kinase domain-containing protein [Uniprot/SPTREMBL Acc. A0A118K7B5]	-1.53838	1.23809e-20	3.5005e-19	104.901	38.7656
Ccrd_025380		-1.53806	5.34723e-12	6.58244e-11	5.79716	2.1354
Ccrd_015194		-1.53597	6.72086e-07	4.11313e-06	7.96747	2.94081
Ccrd_011876	Tetraspanin [Uniprot/SPTREMBL Acc. A0A103YIJ5]	-1.53556	9.41543e-06	4.68446e-05	8.48618	3.1601
Ccrd_009540	Uncharacterized protein [Uniprot/SPTREMBL Acc. A0A124SIA2]	-1.5333	0.00524327	0.0137921	0.939399	0.342225
Ccrd_024091	Cytochrome P450 [Uniprot/SPTREMBL Acc. A0A103DGE6]	-1.53062	0.000246962	0.000920942	3.21194	1.21401
Ccrd_005240	Aldose 1-epimerase [Uniprot/SPTREMBL Acc. A0A103XL39]	-1.53052	3.13635e-05	0.00014099	10.2733	3.83955
Ccrd_018798	Mlo-related protein [Uniprot/SPTREMBL Acc. A0A103Y5H3]	-1.52872	2.91044e-05	0.000131815	2.45579	0.890744
Ccrd_010194	Ferritin [Uniprot/SPTREMBL Acc. A0A103YLQ3]	-1.52833	5.25939e-08	3.91047e-07	234.788	84.7672
Ccrd_017341	AIG1-type G domain-containing protein [Uniprot/SPTREMBL Acc. A0A124SFU4]	-1.5278	1.04215e-21	3.12954e-20	65.3669	24.1101
Ccrd_019466	NAD(P)H dehydrogenase (quinone) [Uniprot/SPTREMBL Acc. A0A103Y475]	-1.52607	1.23933e-18	2.98101e-17	1230.42	455.042
Ccrd_025580	Peptidase_S9 domain-containing protein [Uniprot/SPTREMBL Acc. A0A124S5T8]	-1.52444	2.34037e-09	2.113e-08	16.5329	6.15489
Ccrd_014265	Plastocyanin [Uniprot/SPTREMBL Acc. A0A103YDW9]	-1.52352	1.81594e-09	1.66123e-08	16.8915	6.30501
Ccrd_003013	Bulb-type lectin domain-containing protein [Uniprot/SPTREMBL Acc. A0A103XQ92]	-1.52226	3.16366e-05	0.000141953	3.51338	1.31152
Ccrd_012686	Leucine-rich repeat-containing protein [Uniprot/SPTREMBL Acc. A0A103YH21]	-1.52199	0.0225301	0.0485145	0.855397	0.320329
Ccrd_009916	Glycosyl transferase, family 14 [Uniprot/SPTREMBL Acc. A0A103YMA1]	-1.52144	3.899e-13	5.36293e-12	17.2481	6.44469
Ccrd_011903	PfkB domain-containing protein [Uniprot/SPTREMBL Acc. A0A103YIE8]	-1.51856	3.82241e-14	5.83899e-13	620.926	232.249
Ccrd_011264	Biopterin transport-related protein BT1 [Uniprot/SPTREMBL Acc. A0A103YJL1]	-1.51741	0.000408636	0.00144313	0.719688	0.265592
Ccrd_009968	Calcium-transporting ATPase [Uniprot/SPTREMBL Acc. A0A103YM31]	-1.51729	8.36555e-09	6.99444e-08	2.97953	1.11126
Ccrd_005120	Cystinosin/ERS1p repeat-containing protein [Uniprot/SPTREMBL Acc. A0A103XLG2]	-1.51723	2.03665e-17	4.35214e-16	228.947	86.1489
Ccrd_025351		-1.51703	0.013875	0.032001	4.06015	1.51746
Ccrd_005844	U6 snRNA-associated Sm-like protein LSm8 [Uniprot/SPTREMBL Acc. A0A118JV82]	-1.51636	2.90843e-17	6.12036e-16	7.1638	2.67915
Ccrd_005925		-1.51625	6.10413e-06	3.14291e-05	3.65298	1.35953
Ccrd_009851	Calcium-binding EF-hand [Uniprot/SPTREMBL Acc. A0A103YMH9]	-1.51577	8.50842e-17	1.70363e-15	66.9677	25.1744
Ccrd_021348	Caleosin [Uniprot/SPTREMBL Acc. A0A124SEK3]	-1.51566	4.55951e-10	4.51492e-09	25.6712	9.66743
Ccrd_001648	Amino acid permease, conserved site-containing protein [Uniprot/SPTREMBL Acc. A0A118JXH2]	-1.51485	5.37306e-15	9.06715e-14	14.2581	5.32944
Ccrd_009396	GrpE protein homolog [Uniprot/SPTREMBL Acc. A0A103YN80]	-1.51219	1.27286e-10	1.35103e-09	14.7601	5.57786
Ccrd_021892	ANK_REP_REGION domain-containing protein [Uniprot/SPTREMBL Acc. A0A118JZE7]	-1.51106	2.57034e-08	1.99389e-07	17.1386	6.32895
Ccrd_003937	Photosystem II PsbX [Uniprot/SPTREMBL Acc. A0A103XNP6]	-1.51091	0.000540933	0.00185382	8.21089	3.11853
Ccrd_020345	Protein kinase domain-containing protein [Uniprot/SPTREMBL Acc. A0A103Y2N3]	-1.50989	0.000828042	0.00270636	3.3172	1.25176
Ccrd_009124	Serine/threonine-protein phosphatase [Uniprot/SPTREMBL Acc. A0A124SIE3]	-1.50854	1.13437e-05	5.55101e-05	1.00642	0.380932
Ccrd_009802	Glycosyltransferase [Uniprot/SPTREMBL Acc. A0A103YMG3]	-1.50694	2.20733e-05	0.000102565	2.53295	0.962724
Ccrd_005887	Uncharacterized protein [Uniprot/SPTREMBL Acc. A0A103XJZ4]	-1.5061	1.99441e-09	1.81676e-08	21.994	8.19866
Ccrd_003778	Carbohydrate-binding domain family 9-like protein [Uniprot/SPTREMBL Acc. A0A103XNQ9]	-1.50603	9.66958e-08	6.8649e-07	5.09321	1.92831
Ccrd_016217	Dynein light chain [Uniprot/SPTREMBL Acc. A0A103YAB5]	-1.5054	0.0112192	0.0267235	1.37892	0.529115
Ccrd_026252	Abhydrolase_2 domain-containing protein [Uniprot/SPTREMBL Acc. A0A103XDA7]	-1.50483	0.00319951	0.00892863	2.04263	0.74976
Ccrd_023769	Uncharacterized protein [Uniprot/SPTREMBL Acc. A0A103XW91]	-1.50445	3.63581e-12	4.57468e-11	97.932	36.4444
Ccrd_009634	Uncharacterized protein [Uniprot/SPTREMBL Acc. A0A103YMP8]	-1.50331	8.51231e-18	1.90312e-16	59.9977	22.7057
Ccrd_018896	Allene-oxide cyclase [Uniprot/SPTREMBL Acc. A0A103Y5C4]	-1.50213	1.14814e-10	1.22325e-09	46.8206	18.0068
Ccrd_005738	Ribosomal protein L29 [Uniprot/SPTREMBL Acc. A0A118JUX8]	-1.50116	1.06964e-09	1.01054e-08	19.3713	7.43154
Ccrd_018418	Ubiquinone biosynthesis protein COQ4 homolog, mitochondrial [Uniprot/SPTREMBL Acc. A0A118K1T0]	-1.50108	3.3584e-14	5.17514e-13	45.8168	17.504
Ccrd_008779		-1.49918	2.26015e-18	5.33036e-17	38.462	14.5153
Ccrd_005737	Peptidase A1 domain-containing protein [Uniprot/SPTREMBL Acc. A0A103XK80]	-1.49647	1.0276e-20	2.91818e-19	24.4414	9.24733
Ccrd_016595	HMA domain-containing protein [Uniprot/SPTREMBL Acc. A0A103Y9S2]	-1.49615	6.3647e-13	8.58946e-12	624.656	236.491
Ccrd_019690	Endoplasmic reticulum transmembrane protein [Uniprot/SPTREMBL Acc. A0A118K0Y2]	-1.49476	3.42436e-14	5.27258e-13	19.9659	7.52244
Ccrd_007092		-1.49313	1.68851e-15	2.99855e-14	111.213	42.0432
Ccrd_002786	PRA1 family protein [Uniprot/SPTREMBL Acc. A0A103XQQ2]	-1.49283	0.000310801	0.00113072	6.31725	2.45691
Ccrd_010708		-1.49153	3.88375e-10	3.8916e-09	40.0699	15.1843
Ccrd_005860	Lipase, class 3 [Uniprot/SPTREMBL Acc. A0A124SBY7]	-1.49124	8.01918e-07	4.84634e-06	7.62417	2.8501
Ccrd_022143	Protein kinase domain-containing protein [Uniprot/SPTREMBL Acc. A0A103XZA4]	-1.49053	8.1626e-08	5.86827e-07	6.43971	2.43176
Ccrd_024398		-1.49041	4.31151e-07	2.73378e-06	5.49186	2.09202
Ccrd_002257	Uncharacterized protein [Uniprot/SPTREMBL Acc. A0A118JWE6]	-1.48983	0.000250783	0.000933568	6.24222	2.43414
Ccrd_024364	Protein kinase domain-containing protein [Uniprot/SPTREMBL Acc. A0A103XCK6]	-1.4887	7.58703e-20	2.01823e-18	21.8592	8.3184
Ccrd_023715	Cation_ATPase_N domain-containing protein [Uniprot/SPTREMBL Acc. A0A118JY41]	-1.48869	2.2308e-06	1.24434e-05	3.46942	1.31559
Ccrd_013958	Pentatricopeptide repeat-containing protein [Uniprot/SPTREMBL Acc. A0A118K4K0]	-1.48804	1.16423e-09	1.09455e-08	6.73492	2.53902
Ccrd_026256	Uncharacterized protein [Uniprot/SPTREMBL Acc. A0A103RN34]	-1.48739	3.15143e-08	2.41368e-07	6.25373	2.37719
Ccrd_005823	Uncharacterized protein [Uniprot/SPTREMBL Acc. A0A103XJZ8]	-1.4866	8.50417e-15	1.40326e-13	54.8297	21.0315
Ccrd_026576	AAA+ ATPase domain-containing protein [Uniprot/SPTREMBL Acc. A0A124QRZ4]	-1.48517	0.00235355	0.00683106	0.362072	0.133324
Ccrd_015937	TLC domain-containing protein [Uniprot/SPTREMBL Acc. A0A118K3D7]	-1.48286	3.7864e-08	2.87383e-07	21.1933	7.98408
Ccrd_009599	L51_S25_CI-B8 domain-containing protein [Uniprot/SPTREMBL Acc. A0A124SI95]	-1.48231	2.28388e-19	5.8269e-18	84.8685	32.4568
Ccrd_010379		-1.48173	1.139e-17	2.51165e-16	23.4571	8.9464
Ccrd_007077	Beta2-adaptin/TBP, C-terminal domain-containing protein [Uniprot/SPTREMBL Acc. A0A103XHN0]	-1.4807	1.46952e-15	2.62897e-14	31.7632	12.0753
Ccrd_020068	Peptidase A1 domain-containing protein [Uniprot/SPTREMBL Acc. A0A103Y355]	-1.48062	4.34376e-13	5.94088e-12	732.788	284.529
Ccrd_009834	Ribosomal protein L44e [Uniprot/SPTREMBL Acc. A0A103YMD3]	-1.47989	9.42924e-17	1.8838e-15	484.174	187.499
Ccrd_003902	Thioredoxin domain-containing protein [Uniprot/SPTREMBL Acc. A0A124SCJ8]	-1.47937	5.20928e-13	7.08455e-12	23.0701	8.88715
Ccrd_025478	Uncharacterized protein [Uniprot/SPTREMBL Acc. A0A103X256]	-1.47828	1.54832e-17	3.36061e-16	28.7148	10.9615
Ccrd_023918	KH_dom_type_1 domain-containing protein [Uniprot/SPTREMBL Acc. A0A118EFR0]	-1.47698	0.00100296	0.00321077	1.33094	0.508221
Ccrd_007612	Uncharacterized protein [Uniprot/SPTREMBL Acc. A0A118JTS8]	-1.47686	3.88824e-10	3.89408e-09	47.5422	18.411
Ccrd_009681	NAD(P)H dehydrogenase (quinone) [Uniprot/SPTREMBL Acc. A0A103YMR5]	-1.47658	4.75178e-13	6.47145e-12	21.7861	8.2962
Ccrd_026512	Hydrolase_4 domain-containing protein [Uniprot/SPTREMBL Acc. A0A103XD64]	-1.47633	5.4797e-05	0.000234555	4.53836	1.71991
Ccrd_007098	Mitochondrial carrier domain-containing protein [Uniprot/SPTREMBL Acc. A0A103XHK3]	-1.47617	1.34554e-12	1.76896e-11	165.654	63.8557
Ccrd_011205	SAM_MT_RSMB_NOP domain-containing protein [Uniprot/SPTREMBL Acc. A0A118K6C7]	-1.47611	0.0044425	0.0119391	2.08123	0.786677
Ccrd_018230	Methyltransferase [Uniprot/SPTREMBL Acc. A0A103Y6L3]	-1.47558	2.3827e-12	3.05362e-11	7.91892	3.02588
Ccrd_007123	Uncharacterized protein [Uniprot/SPTREMBL Acc. A0A118JTT3]	-1.47434	1.0336e-16	2.05435e-15	152.098	58.8663
Ccrd_009313	AGC-kinase, C-terminal [Uniprot/SPTREMBL Acc. A0A103YNB9]	-1.47284	6.13145e-08	4.50175e-07	8.06089	3.08831
Ccrd_003098	RING-CH-type domain-containing protein [Uniprot/SPTREMBL Acc. A0A124SCU0]	-1.47266	0.000755573	0.00249352	1.63223	0.637638
Ccrd_024763	AB hydrolase-1 domain-containing protein [Uniprot/SPTREMBL Acc. A0A103XC08]	-1.46999	2.1335e-09	1.93799e-08	4.28211	1.65258
Ccrd_010542		-1.46987	1.96162e-21	5.80056e-20	87.9891	33.8959
Ccrd_025198	BHLH domain-containing protein [Uniprot/SPTREMBL Acc. A0A103XDU7]	-1.46838	1.11089e-10	1.18497e-09	87.0315	34.2222
Ccrd_023214		-1.46735	2.61754e-07	1.72022e-06	23.124	9.08685
Ccrd_026003		-1.46685	8.88359e-08	6.35354e-07	7.55821	2.90884
Ccrd_009618	Zinc finger, Dof-type [Uniprot/SPTREMBL Acc. A0A103YMS3]	-1.4665	3.48201e-16	6.59536e-15	72.3073	27.7969
Ccrd_009643	RING-type E3 ubiquitin transferase [Uniprot/SPTREMBL Acc. A0A118K7B3]	-1.46575	1.02259e-18	2.48752e-17	83.5136	32.2374
Ccrd_005742	Nucleotide-binding, alpha-beta plait [Uniprot/SPTREMBL Acc. A0A124SC01]	-1.46573	1.56062e-12	2.04062e-11	28.3194	11.0864
Ccrd_005701		-1.46558	0.000862997	0.00280449	1.2257	0.46932
Ccrd_003062		-1.4643	3.1203e-10	3.17263e-09	362.033	140.931
Ccrd_024233	Glutamate receptor [Uniprot/SPTREMBL Acc. A0A118JT07]	-1.46245	2.32197e-15	4.08596e-14	9.36662	3.62221
Ccrd_001895		-1.46241	4.62605e-13	6.30467e-12	87.0596	34.0701
Ccrd_000209	Glucan endo-1,3-beta-D-glucosidase [Uniprot/SPTREMBL Acc. A0A103XVJ5]	-1.462	0.000242914	0.000907421	3.43795	1.32304
Ccrd_016245	Auxin efflux carrier [Uniprot/SPTREMBL Acc. A0A103YAE8]	-1.4616	1.36574e-09	1.27287e-08	27.319	10.5764
Ccrd_012564	Cyclin-dependent kinase inhibitor [Uniprot/SPTREMBL Acc. A0A103YH88]	-1.46096	0.00031518	0.00114444	2.79264	1.06674
Ccrd_002014	Homeodomain-like protein [Uniprot/SPTREMBL Acc. A0A118JXS2]	-1.46041	0.00784448	0.0195294	1.34643	0.515027
Ccrd_004282		-1.46005	0.000795765	0.00261545	1.17115	0.438743
Ccrd_011082		-1.45993	0.00605748	0.0156388	0.854456	0.32647
Ccrd_015362	Oleosin [Uniprot/SPTREMBL Acc. A0A103YBZ8]	-1.45986	5.73248e-10	5.59901e-09	111.573	44.0213
Ccrd_015813		-1.45898	1.21595e-08	9.93465e-08	5.52409	2.14237
Ccrd_011278	Uncharacterized protein [Uniprot/SPTREMBL Acc. A0A118K697]	-1.45576	1.31073e-14	2.12119e-13	49.786	19.3948
Ccrd_019791	4-hydroxy-4-methyl-2-oxoglutarate aldolase [Uniprot/SPTREMBL Acc. A0A103Y3N0]	-1.45554	1.63766e-17	3.53862e-16	91.4312	35.8924
Ccrd_009780	Protein YIPF [Uniprot/SPTREMBL Acc. A0A124SI74]	-1.4554	2.11709e-07	1.41376e-06	4.97647	1.95136
Ccrd_019289	S-acyltransferase [Uniprot/SPTREMBL Acc. A0A103Y4K0]	-1.45498	1.76658e-17	3.80021e-16	80.6691	31.7125
Ccrd_009978	Aldedh domain-containing protein [Uniprot/SPTREMBL Acc. A0A118K730]	-1.45496	3.88307e-16	7.31917e-15	24.6364	9.56349
Ccrd_012039		-1.45487	0.00252103	0.00724216	0.589532	0.222787
Ccrd_025949		-1.45395	0.000128362	0.000509418	8.53577	3.38354
Ccrd_009517	Protein kinase domain-containing protein [Uniprot/SPTREMBL Acc. A0A103YN23]	-1.45136	8.81727e-11	9.51547e-10	6.29383	2.44806
Ccrd_009961	Argonaute/Dicer protein, PAZ [Uniprot/SPTREMBL Acc. A0A118K740]	-1.4496	0.00185399	0.00552881	0.5739	0.216711
Ccrd_005741	Nucleotide-sugar transporter [Uniprot/SPTREMBL Acc. A0A118JUY6]	-1.44839	2.84931e-13	3.99296e-12	34.0161	13.1601
Ccrd_005830	Acyltransferase [Uniprot/SPTREMBL Acc. A0A103XJX5]	-1.44736	3.20384e-15	5.5222e-14	51.8153	20.25
Ccrd_009531	Uncharacterized protein [Uniprot/SPTREMBL Acc. A0A118K7E6]	-1.44622	2.58368e-11	2.9409e-10	266.107	103.523
Ccrd_023949		-1.44597	0.0147978	0.0338228	2.26228	0.840097
Ccrd_009370	Sodium/calcium exchanger membrane region [Uniprot/SPTREMBL Acc. A0A118K7I3]	-1.44581	7.23857e-09	6.11563e-08	8.14653	3.21126
Ccrd_005103	Cytochrome c domain-containing protein [Uniprot/SPTREMBL Acc. A0A103XL82]	-1.4447	4.9295e-11	5.46626e-10	286.452	113.929
Ccrd_009800	Uncharacterized protein [Uniprot/SPTREMBL Acc. A0A103YM99]	-1.44461	5.44732e-17	1.11241e-15	70.1158	27.7257
Ccrd_001029	Transcription factor, K-box [Uniprot/SPTREMBL Acc. A0A118JXE9]	-1.44331	0.003037	0.00852433	11.9542	4.55341
Ccrd_005471	Uncharacterized protein [Uniprot/SPTREMBL Acc. A0A103XKN9]	-1.44318	1.64781e-08	1.31356e-07	222.007	89.1542
Ccrd_017270		-1.44148	4.21376e-05	0.000184283	2.16897	0.861333
Ccrd_014260		-1.44102	0.000302342	0.00110279	1.95387	0.756208
Ccrd_008231	AP2/ERF domain-containing protein [Uniprot/SPTREMBL Acc. A0A103XFF9]	-1.44082	4.64742e-05	0.000201562	2.4598	0.967964
Ccrd_009416	Amylomaltase [Uniprot/SPTREMBL Acc. A0A118K7G2]	-1.44046	4.3485e-09	3.80868e-08	6.91815	2.71385
Ccrd_004621		-1.43985	1.01368e-11	1.21385e-10	31.0679	12.4232
Ccrd_020064	FAD-binding FR-type domain-containing protein [Uniprot/SPTREMBL Acc. A0A103Y346]	-1.4392	9.20504e-08	6.5616e-07	2.8061	1.1007
Ccrd_009684	CAP10 domain-containing protein [Uniprot/SPTREMBL Acc. A0A103YMH6]	-1.43893	3.76686e-05	0.000166318	2.80878	1.11841
Ccrd_003938	RING-type domain-containing protein [Uniprot/SPTREMBL Acc. A0A124SCK5]	-1.43738	2.9314e-14	4.5571e-13	36.8182	14.5339
Ccrd_018958	Phosphotransferase [Uniprot/SPTREMBL Acc. A0A118K1E6]	-1.43591	8.49711e-05	0.000349629	2.34474	0.92181
Ccrd_019763	HTH La-type RNA-binding domain-containing protein [Uniprot/SPTREMBL Acc. A0A103Y3T8]	-1.43527	8.13608e-10	7.78929e-09	9.01847	3.53926
Ccrd_005927		-1.43493	1.39388e-06	8.05145e-06	5.7287	2.29113
Ccrd_004915	AP2/ERF domain-containing protein [Uniprot/SPTREMBL Acc. A0A103XLX1]	-1.43375	0.0102206	0.0246204	2.10633	0.814904
Ccrd_014865		-1.4328	0.000500381	0.00173017	10.1767	4.03311
Ccrd_018106		-1.43229	3.47624e-10	3.50688e-09	76.1307	30.0742
Ccrd_002974	WRKY domain-containing protein [Uniprot/SPTREMBL Acc. A0A103XQD3]	-1.43215	0.000220204	0.000829151	2.78131	1.0793
Ccrd_001853	Carbonic anhydrase [Uniprot/SPTREMBL Acc. A0A124SD71]	-1.43152	4.29241e-08	3.23126e-07	7.00099	2.75948
Ccrd_012935	LEA_2 domain-containing protein [Uniprot/SPTREMBL Acc. A0A103YGJ2]	-1.43113	1.25737e-08	1.02514e-07	73.4718	28.961
Ccrd_018831	Galactose-binding domain-like protein [Uniprot/SPTREMBL Acc. A0A118K1H3]	-1.4309	5.44722e-08	4.0377e-07	1.96664	0.776556
Ccrd_022112	Uncharacterized protein [Uniprot/SPTREMBL Acc. A0A103XZA2]	-1.43023	6.91014e-05	0.000289818	4.54309	1.79684
Ccrd_023476	Uncharacterized protein [Uniprot/SPTREMBL Acc. A0A118JYA4]	-1.42894	0.000183046	0.000702786	3.11202	1.25952
Ccrd_019853	Metallothionein, family 15, plant [Uniprot/SPTREMBL Acc. A0A124SF19]	-1.42606	1.31337e-11	1.54779e-10	21.2606	8.50337
Ccrd_020378		-1.42553	1.40864e-16	2.76005e-15	29.8124	11.7824
Ccrd_007079	YTH domain-containing protein [Uniprot/SPTREMBL Acc. A0A118JUB2]	-1.42534	4.75242e-14	7.15788e-13	142.962	56.8673
Ccrd_017720	Glutathione transferase [Uniprot/SPTREMBL Acc. A0A124SFQ7]	-1.42517	5.97866e-10	5.82475e-09	322.916	127.959
Ccrd_017173	Glutamate dehydrogenase [Uniprot/SPTREMBL Acc. A0A118K2K2]	-1.4249	2.36957e-11	2.70994e-10	21.419	8.46307
Ccrd_015097		-1.42467	7.14477e-08	5.17889e-07	3.64327	1.43202
Ccrd_002849	AB hydrolase-1 domain-containing protein [Uniprot/SPTREMBL Acc. A0A103XQJ8]	-1.42244	1.09423e-17	2.41844e-16	38.3211	15.2461
Ccrd_012017	BZIP domain-containing protein [Uniprot/SPTREMBL Acc. A0A118K5U0]	-1.42236	2.34433e-10	2.40643e-09	3.07052	1.22334
Ccrd_017382	Glutaredoxin domain-containing protein [Uniprot/SPTREMBL Acc. A0A103Y876]	-1.42146	4.94793e-09	4.29672e-08	92.9766	37.021
Ccrd_021578	MFS domain-containing protein [Uniprot/SPTREMBL Acc. A0A103Y0F3]	-1.41892	2.071e-05	9.67182e-05	73.5409	30.5159
Ccrd_026041		-1.41851	2.44343e-19	6.21756e-18	30.8896	12.3794
Ccrd_005734	Ribos_L4_asso_C domain-containing protein [Uniprot/SPTREMBL Acc. A0A118JUT1]	-1.41846	2.06639e-12	2.66591e-11	480.759	194.64
Ccrd_010231	Transcription repressor [Uniprot/SPTREMBL Acc. A0A103YLH6]	-1.41793	0.0139486	0.0321517	0.739461	0.3046
Ccrd_022623	CASP-like protein [Uniprot/SPTREMBL Acc. A0A118JZ29]	-1.41774	3.99597e-17	8.28275e-16	45.3053	18.1174
Ccrd_019044	Peroxidase [Uniprot/SPTREMBL Acc. A0A103Y519]	-1.41759	2.99778e-15	5.19015e-14	121.346	48.2204
Ccrd_005398	Reticulon-like protein [Uniprot/SPTREMBL Acc. A0A103XKR7]	-1.41715	0.00259457	0.00742803	1.98057	0.811409
Ccrd_001074		-1.41714	7.74321e-05	0.000320655	8.91664	3.6202
Ccrd_005637	Homeodomain-like protein [Uniprot/SPTREMBL Acc. A0A103XKJ8]	-1.41644	6.85241e-13	9.23476e-12	19.4899	7.87123
Ccrd_022343	Uncharacterized protein [Uniprot/SPTREMBL Acc. A0A103XYT8]	-1.41642	8.12039e-12	9.77834e-11	22.1301	8.94041
Ccrd_009658		-1.41551	0.00590088	0.0152849	4.97315	2.00647
Ccrd_003771	Formin-like protein [Uniprot/SPTREMBL Acc. A0A124SCL3]	-1.41503	3.22717e-13	4.49642e-12	32.9585	13.2677
Ccrd_013995	Cytochrome b5 heme-binding domain-containing protein [Uniprot/SPTREMBL Acc. A0A103YEL4]	-1.41359	6.48473e-08	4.74492e-07	21.05	8.33509
Ccrd_018693	Uncharacterized protein [Uniprot/SPTREMBL Acc. A0A118K1S0]	-1.41355	1.61812e-13	2.32833e-12	83.9222	33.4959
Ccrd_018725	MLO-like protein [Uniprot/SPTREMBL Acc. A0A124SFE3]	-1.41164	1.14891e-06	6.74113e-06	3.02829	1.19929
Ccrd_015486	UDP-arabinopyranose mutase [Uniprot/SPTREMBL Acc. A0A103YBT0]	-1.40787	9.22862e-06	4.5998e-05	38.6047	15.7795
Ccrd_009358	J domain-containing protein [Uniprot/SPTREMBL Acc. A0A124SIC1]	-1.40683	2.15735e-16	4.15133e-15	39.4703	16.0389
Ccrd_013588	Str_synth domain-containing protein [Uniprot/SPTREMBL Acc. A0A118K4U4]	-1.40664	3.73703e-13	5.15849e-12	13.8104	5.60612
Ccrd_019359		-1.40465	6.83583e-06	3.48992e-05	4.76771	1.88732
Ccrd_012937	Membrane associated eicosanoid/glutathione metabolism-like domain-containing protein [Uniprot/SPTREMBL Acc. A0A103YGM0]	-1.40444	1.28608e-08	1.04502e-07	624.347	257.613
Ccrd_016689		-1.40396	3.9381e-07	2.51186e-06	22.4046	9.22037
Ccrd_005430	HSF_DOMAIN domain-containing protein [Uniprot/SPTREMBL Acc. A0A118JVH6]	-1.403	3.54443e-16	6.70047e-15	362.101	145.495
Ccrd_007443	3'-5' exonuclease domain-containing protein [Uniprot/SPTREMBL Acc. A0A103XGW9]	-1.4027	0.0145579	0.0333453	0.700468	0.264365
Ccrd_015791	Mitochondrial carrier domain-containing protein [Uniprot/SPTREMBL Acc. A0A103YB61]	-1.4017	2.05062e-16	3.9673e-15	39.5913	16.0361
Ccrd_019912	Fn3_like domain-containing protein [Uniprot/SPTREMBL Acc. A0A103Y3E0]	-1.39996	0.000597265	0.00202605	1.25468	0.515917
Ccrd_021272	ATP-NAD kinase-like domain-containing protein [Uniprot/SPTREMBL Acc. A0A124SEL3]	-1.39943	3.35848e-18	7.80646e-17	34.9117	14.0813
Ccrd_009413	NAC-A/B domain-containing protein [Uniprot/SPTREMBL Acc. A0A118K7G5]	-1.3991	2.60562e-11	2.96064e-10	118.139	48.669
Ccrd_015794	Uncharacterized protein [Uniprot/SPTREMBL Acc. A0A103YB57]	-1.3987	0.00405154	0.0109938	0.979416	0.381823
Ccrd_015845	Glutamate receptor [Uniprot/SPTREMBL Acc. A0A103YB30]	-1.39681	5.85452e-05	0.000249056	2.50853	1.00545
Ccrd_016909	Ribosomal_L7Ae domain-containing protein [Uniprot/SPTREMBL Acc. A0A103Y934]	-1.39674	5.72396e-11	6.30744e-10	593.741	243.825
Ccrd_023996	AGC-kinase, C-terminal [Uniprot/SPTREMBL Acc. A0A124SAS0]	-1.39633	1.11453e-09	1.05038e-08	2.08852	0.842506
Ccrd_009031		-1.39368	6.65268e-12	8.10177e-11	55.7177	22.972
Ccrd_012190	Glycosyltransferase [Uniprot/SPTREMBL Acc. A0A103YHZ4]	-1.39337	2.32987e-13	3.29849e-12	40.5107	16.6793
Ccrd_011095		-1.39291	3.85356e-08	2.92251e-07	9.42665	3.84122
Ccrd_017168	HAD-like domain-containing protein [Uniprot/SPTREMBL Acc. A0A118K2K4]	-1.39217	0.00189557	0.00564063	3.88777	1.57818
Ccrd_013699	Uncharacterized protein [Uniprot/SPTREMBL Acc. A0A118K4R7]	-1.39123	2.03352e-09	1.85065e-08	7.58342	3.10041
Ccrd_017648		-1.38978	1.13705e-17	2.51021e-16	18.8918	7.74706
Ccrd_025806	Fe2OG dioxygenase domain-containing protein [Uniprot/SPTREMBL Acc. A0A103UJ28]	-1.38931	1.12363e-15	2.0195e-14	23.2963	9.53732
Ccrd_004524	Ubiquinol oxidase [Uniprot/SPTREMBL Acc. A0A118JVL5]	-1.38733	1.808e-06	1.02386e-05	5.45475	2.23505
Ccrd_010268	Aminotransferase class-III [Uniprot/SPTREMBL Acc. A0A103YLK8]	-1.38525	2.31818e-14	3.63301e-13	144.082	59.2288
Ccrd_009841	Hly-III-related protein [Uniprot/SPTREMBL Acc. A0A103YMC0]	-1.3848	0.00116386	0.00366757	5.28287	2.21791
Ccrd_008405	BHLH domain-containing protein [Uniprot/SPTREMBL Acc. A0A103XF90]	-1.38389	0.000191643	0.000732065	1.533	0.61104
Ccrd_012213	Ankyrin repeat-containing protein [Uniprot/SPTREMBL Acc. A0A124SHF1]	-1.38228	7.99219e-09	6.70256e-08	6.20442	2.53679
Ccrd_010160		-1.38137	9.75208e-17	1.94028e-15	30.6644	12.5643
Ccrd_014042		-1.38087	0.0113646	0.0270365	0.538613	0.223082
Ccrd_020284	Chloroplast envelope membrane protein, CemA [Uniprot/SPTREMBL Acc. A0A118K0H5]	-1.38001	0.00833489	0.0205602	0.401691	0.159912
Ccrd_014352	Aquaporin-like protein [Uniprot/SPTREMBL Acc. A0A103YDZ5]	-1.37875	0.00683555	0.0173709	1.72312	0.712328
Ccrd_011711	Uncharacterized protein [Uniprot/SPTREMBL Acc. A0A103YIX2]	-1.37857	1.91329e-08	1.5084e-07	48.5512	20.2852
Ccrd_009377	Glycoside hydrolase, family 28 [Uniprot/SPTREMBL Acc. A0A118K7H1]	-1.37836	4.38089e-17	9.04184e-16	44.6741	18.4365
Ccrd_018920		-1.37611	1.05891e-11	1.26488e-10	25.4272	10.6235
Ccrd_017340	Superoxide dismutase [Uniprot/SPTREMBL Acc. A0A103Y8A7]	-1.37599	8.00835e-12	9.65545e-11	19.9977	8.19724
Ccrd_018223		-1.37539	2.96343e-06	1.61118e-05	5.29626	2.18777
Ccrd_016164	Protein kinase domain-containing protein [Uniprot/SPTREMBL Acc. A0A118K381]	-1.3741	0.00347783	0.00961236	2.72992	1.12951
Ccrd_025108		-1.37325	0.00268767	0.00766506	3.50741	1.439
Ccrd_005458	AP2/ERF domain-containing protein [Uniprot/SPTREMBL Acc. A0A103XKS0]	-1.37281	4.45358e-05	0.000194025	36.7312	15.5621
Ccrd_005840	Ribosomal protein L29 [Uniprot/SPTREMBL Acc. A0A103XK82]	-1.37256	1.54093e-18	3.68356e-17	155.473	64.3203
Ccrd_002052		-1.37115	7.99507e-06	4.0391e-05	4.88484	2.03347
Ccrd_003801		-1.36971	0.00183931	0.00549097	1.59642	0.670499
Ccrd_016993	C4-dicarboxylate transporter/malic acid transport protein [Uniprot/SPTREMBL Acc. A0A118K2N7]	-1.36905	6.50238e-11	7.10449e-10	45.7619	18.9694
Ccrd_023288		-1.36887	4.66164e-15	7.92192e-14	22.4657	9.32792
Ccrd_003721		-1.3687	3.28305e-11	3.68919e-10	279.277	116.522
Ccrd_009626		-1.36846	2.18398e-11	2.50956e-10	20.5391	8.53893
Ccrd_009454	Actin/actin-like conserved site-containing protein [Uniprot/SPTREMBL Acc. A0A124SIA6]	-1.36832	9.83983e-05	0.000399438	8.27097	3.40787
Ccrd_014620	Uncharacterized protein [Uniprot/SPTREMBL Acc. A0A103YDC5]	-1.36818	2.45354e-12	3.13609e-11	11.3588	4.70708
Ccrd_019317		-1.36699	0.000148467	0.000581479	1.07837	0.443346
Ccrd_009056	DUF4149 domain-containing protein [Uniprot/SPTREMBL Acc. A0A118K7L9]	-1.36669	4.00821e-10	4.00593e-09	191.788	79.761
Ccrd_007104	Peptidyl-tRNA hydrolase [Uniprot/SPTREMBL Acc. A0A118JU20]	-1.36576	4.74939e-08	3.5545e-07	26.5757	10.9007
Ccrd_016237	Bet v I domain-containing protein [Uniprot/SPTREMBL Acc. A0A103YAD3]	-1.36559	6.41583e-12	7.82812e-11	379.71	156.132
Ccrd_010652	Non-specific serine/threonine protein kinase [Uniprot/SPTREMBL Acc. A0A103YKY7]	-1.36549	1.06848e-18	2.58614e-17	85.6665	35.5433
Ccrd_009353	DNA/RNA helicase, DEAD/DEAH box type, N-terminal [Uniprot/SPTREMBL Acc. A0A124SIB8]	-1.36517	4.22939e-15	7.20635e-14	122.604	51.3444
Ccrd_010828	Peptidylprolyl isomerase [Uniprot/SPTREMBL Acc. A0A103YKE8]	-1.36441	1.23279e-08	1.00595e-07	31.3408	13.0648
Ccrd_007108	Annexin [Uniprot/SPTREMBL Acc. A0A103XHL5]	-1.36399	3.28962e-14	5.07724e-13	129.624	53.3332
Ccrd_010156	DUF4793 domain-containing protein [Uniprot/SPTREMBL Acc. A0A103YLQ6]	-1.36384	1.57312e-12	2.05419e-11	17.2771	7.15698
Ccrd_017058	Protein-serine/threonine phosphatase [Uniprot/SPTREMBL Acc. A0A118K2M2]	-1.36355	2.17041e-13	3.08583e-12	41.2297	17.0968
Ccrd_005241	3-dehydroquinate synthase, prokaryotic-type [Uniprot/SPTREMBL Acc. A0A103XL97]	-1.36325	1.10651e-10	1.18095e-09	9.97222	4.1251
Ccrd_010029	Cytochrome b5 heme-binding domain-containing protein [Uniprot/SPTREMBL Acc. A0A103YM55]	-1.363	8.60283e-12	1.03271e-10	46.6761	19.4626
Ccrd_009289		-1.36221	8.34395e-14	1.22617e-12	92.2522	38.7011
Ccrd_017771		-1.36175	0.000535464	0.00183931	3.69513	1.54981
Ccrd_015718	Malic enzyme [Uniprot/SPTREMBL Acc. A0A103YB97]	-1.36144	1.26596e-18	3.04129e-17	43.5433	18.1254
Ccrd_016051	Xanthine/uracil/vitamin C permease [Uniprot/SPTREMBL Acc. A0A103YAP7]	-1.3614	6.40423e-14	9.54907e-13	24.4889	10.218
Ccrd_018122	HMA domain-containing protein [Uniprot/SPTREMBL Acc. A0A103Y6T1]	-1.3611	0.00161208	0.00489035	1.27573	0.514193
Ccrd_004719	Glucan endo-1,3-beta-D-glucosidase [Uniprot/SPTREMBL Acc. A0A103XM08]	-1.35959	7.05964e-12	8.57039e-11	70.7556	29.9257
Ccrd_009174	Histone H2A [Uniprot/SPTREMBL Acc. A0A118K7K8]	-1.35911	1.5129e-07	1.03495e-06	3.62178	1.51072
Ccrd_020511		-1.35903	1.09298e-07	7.70024e-07	86.3502	36.1224
Ccrd_009743	MFS domain-containing protein [Uniprot/SPTREMBL Acc. A0A103YMJ9]	-1.35803	1.57266e-13	2.26799e-12	17.3467	7.29489
Ccrd_015909		-1.35789	2.35629e-10	2.41742e-09	63.863	26.969
Ccrd_018435	Uncharacterized protein [Uniprot/SPTREMBL Acc. A0A103Y687]	-1.35765	2.2012e-05	0.000102354	2.69472	1.1262
Ccrd_018975	Leucine-rich repeat-containing protein [Uniprot/SPTREMBL Acc. A0A118K1F9]	-1.35737	6.67237e-09	5.65951e-08	69.1624	29.4621
Ccrd_021861	Purple acid phosphatase [Uniprot/SPTREMBL Acc. A0A103XZT5]	-1.35709	0.000774098	0.00254943	1.74472	0.721123
Ccrd_009412	RING-type E3 ubiquitin transferase [Uniprot/SPTREMBL Acc. A0A103YN73]	-1.35696	0.000254617	0.000946203	1.38176	0.585982
Ccrd_009186	Uncharacterized protein [Uniprot/SPTREMBL Acc. A0A103YNQ7]	-1.35673	0.000941811	0.00303494	1.34556	0.561162
Ccrd_019981		-1.3544	0.000375507	0.00134306	1.87795	0.785219
Ccrd_006093		-1.35429	1.96752e-10	2.03912e-09	33.1803	13.9493
Ccrd_012528	Chorismate mutase [Uniprot/SPTREMBL Acc. A0A103YHC8]	-1.3534	4.46784e-12	5.57442e-11	69.6523	28.8402
Ccrd_024505	5'-nucleotidase [Uniprot/SPTREMBL Acc. A0A103XCB5]	-1.35281	9.056e-17	1.81111e-15	51.3877	21.5812
Ccrd_011426	LEA_2 domain-containing protein [Uniprot/SPTREMBL Acc. A0A118K650]	-1.35259	3.40286e-11	3.81717e-10	15.8869	6.63158
Ccrd_001353	Flavin-containing monooxygenase [Uniprot/SPTREMBL Acc. A0A103XTH3]	-1.35224	5.96451e-08	4.38751e-07	5.66245	2.38434
Ccrd_009474	Uncharacterized protein [Uniprot/SPTREMBL Acc. A0A103YN02]	-1.35177	1.17994e-12	1.56293e-11	73.3377	30.8441
Ccrd_000892	Lipase_GDSL domain-containing protein [Uniprot/SPTREMBL Acc. A0A118JXH6]	-1.3517	0.000139227	0.000548149	6.28693	2.59787
Ccrd_000068	MFS domain-containing protein [Uniprot/SPTREMBL Acc. A0A118JYQ2]	-1.3513	8.28094e-06	4.16502e-05	1.28207	0.52723
Ccrd_007103	Protein kinase domain-containing protein [Uniprot/SPTREMBL Acc. A0A103XHF5]	-1.35029	9.47927e-13	1.26515e-11	25.3538	10.5827
Ccrd_010184		-1.35023	0.0001197	0.000477787	5.41209	2.24893
Ccrd_009952	Cytochrome b-c1 complex subunit 7 [Uniprot/SPTREMBL Acc. A0A103YM07]	-1.34887	8.16312e-10	7.81131e-09	199.088	84.6959
Ccrd_018775	Calcium-binding EF-hand [Uniprot/SPTREMBL Acc. A0A103Y5K0]	-1.34864	2.14455e-16	4.13083e-15	21.5972	9.03337
Ccrd_019360	LEA_2 domain-containing protein [Uniprot/SPTREMBL Acc. A0A103Y4I0]	-1.34864	4.84091e-07	3.03522e-06	20.017	8.44754
Ccrd_020545	DUF4408 domain-containing protein [Uniprot/SPTREMBL Acc. A0A124SEU4]	-1.34781	2.9673e-18	6.93052e-17	136.562	57.1612
Ccrd_010287		-1.34673	9.70808e-11	1.04245e-09	69.7791	29.5371
Ccrd_017004		-1.34629	5.98465e-06	3.08797e-05	3.60454	1.51549
Ccrd_007111		-1.34593	4.41268e-09	3.86314e-08	55.9339	23.8918
Ccrd_001015	MBOAT_2 domain-containing protein [Uniprot/SPTREMBL Acc. A0A103XU17]	-1.34573	1.02523e-09	9.71911e-09	65.8185	28.1837
Ccrd_006887	PMR5N domain-containing protein [Uniprot/SPTREMBL Acc. A0A103XI69]	-1.34438	0.000170666	0.000659179	1.85658	0.762351
Ccrd_012253	Acyl-CoA dehydrogenase, conserved site-containing protein [Uniprot/SPTREMBL Acc. A0A103YHV4]	-1.34424	0.0231737	0.0496573	1.08606	0.433159
Ccrd_025947		-1.34414	7.05374e-18	1.59547e-16	142.973	60.01
Ccrd_021288		-1.34409	3.06128e-12	3.87702e-11	15.9351	6.67104
Ccrd_009704	Argonaute/Dicer protein, PAZ [Uniprot/SPTREMBL Acc. A0A103YMS6]	-1.34328	1.46295e-16	2.86356e-15	5.45874	2.30785
Ccrd_024960		-1.34274	3.70849e-10	3.73339e-09	11.5152	4.83476
Ccrd_024654	Alcohol dehydrogenase, C-terminal [Uniprot/SPTREMBL Acc. A0A103XC27]	-1.34175	2.61877e-13	3.68591e-12	7.28372	3.06454
Ccrd_017915	RING-type E3 ubiquitin transferase [Uniprot/SPTREMBL Acc. A0A103Y776]	-1.3414	0.00278511	0.00790451	0.338777	0.140146
Ccrd_018564	AP2/ERF domain-containing protein [Uniprot/SPTREMBL Acc. A0A103Y605]	-1.34007	2.92993e-06	1.59566e-05	4.95358	2.10178
Ccrd_010599	Phytocyanin domain-containing protein [Uniprot/SPTREMBL Acc. A0A118K6P2]	-1.33981	0.00869786	0.0213679	1.88165	0.77163
Ccrd_011240	Thiamine thiazole synthase, chloroplastic [Uniprot/SPTREMBL Acc. A0A103YJL9]	-1.33956	5.40638e-11	5.97451e-10	1209.02	514.972
Ccrd_022975		-1.33822	5.52496e-07	3.42349e-06	466.744	198.419
Ccrd_012371	Glycerophosphodiester phosphodiesterase [Uniprot/SPTREMBL Acc. A0A124SHD4]	-1.33811	0.0037942	0.01038	50.6123	20.3493
Ccrd_009817		-1.3373	1.14979e-05	5.62078e-05	4.64026	1.94802
Ccrd_005279	Uncharacterized protein [Uniprot/SPTREMBL Acc. A0A103XL17]	-1.337	1.95355e-17	4.1838e-16	5.97021	2.53409
Ccrd_009196	BHLH domain-containing protein [Uniprot/SPTREMBL Acc. A0A103YNK7]	-1.33615	1.45065e-07	9.96239e-07	22.3661	9.41249
Ccrd_018222	Calmodulin-binding domain, plant [Uniprot/SPTREMBL Acc. A0A103Y6K6]	-1.33597	2.73054e-14	4.24826e-13	12.8734	5.44969
Ccrd_010774		-1.33588	5.94425e-10	5.79414e-09	6.9325	2.96021
Ccrd_004316	Myc-type, basic helix-loop-helix (BHLH) domain-containing protein [Uniprot/SPTREMBL Acc. A0A103XMU5]	-1.335	0.0168352	0.0377918	1.75801	0.720617
Ccrd_005790		-1.33475	2.19291e-17	4.67213e-16	23.876	10.0976
Ccrd_020931	Uncharacterized protein [Uniprot/SPTREMBL Acc. A0A103Y1K3]	-1.33469	1.61991e-07	1.10191e-06	30.19	12.8956
Ccrd_017657	Peptidoglycan-binding lysin domain-containing protein [Uniprot/SPTREMBL Acc. A0A103Y7Q2]	-1.33415	4.34364e-18	9.9646e-17	71.9069	30.5376
Ccrd_025943	Ribosomal protein L39e [Uniprot/SPTREMBL Acc. A0A103XDM1]	-1.33412	1.63482e-09	1.50695e-08	322.588	138.697
Ccrd_021357		-1.33338	0.0214402	0.04652	0.778509	0.338656
Ccrd_017442	N-acetyltransferase domain-containing protein [Uniprot/SPTREMBL Acc. A0A103Y837]	-1.33249	0.000268063	0.00099065	1.81266	0.758191
Ccrd_002528		-1.33203	1.68336e-11	1.95758e-10	86.9704	36.5424
Ccrd_009452	Actin/actin-like conserved site-containing protein [Uniprot/SPTREMBL Acc. A0A118K7E4]	-1.33124	7.06447e-05	0.000295139	5.31734	2.26841
Ccrd_011823	Actin/actin-like conserved site-containing protein [Uniprot/SPTREMBL Acc. A0A118K5Y4]	-1.33113	8.55717e-08	6.13597e-07	93.8933	40.6382
Ccrd_010610	Ribosome assembly factor mrt4 [Uniprot/SPTREMBL Acc. A0A103YKV1]	-1.33094	1.22632e-11	1.45586e-10	29.2666	12.3712
Ccrd_013282	Serine hydroxymethyltransferase [Uniprot/SPTREMBL Acc. A0A103YFW7]	-1.33093	4.99419e-11	5.53165e-10	566.219	243.182
Ccrd_024811	AP2/ERF domain-containing protein [Uniprot/SPTREMBL Acc. A0A118JRP7]	-1.3297	7.65737e-06	3.88168e-05	12.0252	5.13343
Ccrd_008364	Heme peroxidase [Uniprot/SPTREMBL Acc. A0A103XFC1]	-1.32956	0.00495359	0.013105	2.61046	1.1169
Ccrd_005788	Calcium-binding EF-hand [Uniprot/SPTREMBL Acc. A0A103XK31]	-1.3292	2.79885e-17	5.90262e-16	56.1104	23.9751
Ccrd_010378	UBC core domain-containing protein [Uniprot/SPTREMBL Acc. A0A103YL93]	-1.3288	5.58998e-18	1.27332e-16	69.4052	29.4757
Ccrd_003412		-1.32842	1.94313e-10	2.016e-09	7.29529	3.09108
Ccrd_008935		-1.32839	0.00940976	0.0228641	1.81097	0.776087
Ccrd_015492	HVA22-like protein [Uniprot/SPTREMBL Acc. A0A118K3M7]	-1.32644	9.5674e-10	9.10103e-09	143.431	61.8228
Ccrd_005109	Prohibitin [Uniprot/SPTREMBL Acc. A0A103XLP1]	-1.32587	7.49476e-09	6.30727e-08	397.979	172.696
Ccrd_009399	Glycosyl transferase, family 14 [Uniprot/SPTREMBL Acc. A0A103YN43]	-1.32584	5.00702e-08	3.73353e-07	5.07993	2.16251
Ccrd_007281	Arogenate dehydratase [Uniprot/SPTREMBL Acc. A0A124SBH7]	-1.32577	1.77625e-07	1.20024e-06	111.811	47.3235
Ccrd_018108	Glycosyltransferase [Uniprot/SPTREMBL Acc. A0A118K1Z7]	-1.32558	4.10695e-14	6.23915e-13	59.8666	25.4229
Ccrd_001344	Extracellular ligand-binding receptor [Uniprot/SPTREMBL Acc. A0A103XTF7]	-1.32425	7.52985e-06	3.81904e-05	3.53553	1.48678
Ccrd_021396	Rapid ALkalinization Factor [Uniprot/SPTREMBL Acc. A0A103Y0P2]	-1.32392	3.63199e-11	4.06477e-10	204.264	87.6918
Ccrd_009394		-1.32364	5.66592e-05	0.000241884	2.50967	1.05723
Ccrd_009495		-1.32277	1.5629e-12	2.04222e-11	20.9499	8.93612
Ccrd_019092	S-adenosylmethionine decarboxylase alpha chain [Uniprot/SPTREMBL Acc. A0A118K1K1]	-1.32268	1.1491e-16	2.25837e-15	53.9156	23.1109
Ccrd_007189	RING-type domain-containing protein [Uniprot/SPTREMBL Acc. A0A103XHB7]	-1.32257	9.21457e-05	0.000376189	2.71841	1.14459
Ccrd_013960	NB-ARC domain-containing protein [Uniprot/SPTREMBL Acc. A0A103YEK5]	-1.3214	0.000524796	0.00180813	2.24877	0.960125
Ccrd_003130	Major facilitator superfamily [Uniprot/SPTREMBL Acc. A0A103XQ20]	-1.32068	8.19239e-12	9.85891e-11	41.2174	17.6313
Ccrd_005834	Uncharacterized protein [Uniprot/SPTREMBL Acc. A0A118JU83]	-1.3205	1.1654e-08	9.54989e-08	1215.72	522.511
Ccrd_026742	Histone H4 [Uniprot/SPTREMBL Acc. A0A103Y619]	-1.31926	6.85408e-10	6.6375e-09	241.257	104.773
Ccrd_017999	Uncharacterized protein [Uniprot/SPTREMBL Acc. A0A124SFM6]	-1.31918	0.00634155	0.0162673	6.99455	2.91542
Ccrd_023891	Glycosyl transferase, family 14 [Uniprot/SPTREMBL Acc. A0A103XW26]	-1.31762	3.75658e-05	0.000165902	4.60339	1.97157
Ccrd_010190	BPL/LPL catalytic domain-containing protein [Uniprot/SPTREMBL Acc. A0A103YLR1]	-1.31635	3.56677e-10	3.59634e-09	21.077	9.11286
Ccrd_002467	RHOMBOID-like protein [Uniprot/SPTREMBL Acc. A0A103XRA8]	-1.3163	1.38745e-12	1.82158e-11	88.9101	38.4026
Ccrd_021579	Major facilitator superfamily [Uniprot/SPTREMBL Acc. A0A103Y0B1]	-1.31544	0.00133903	0.00414725	2.04859	0.902384
Ccrd_018141	RECA_2 domain-containing protein [Uniprot/SPTREMBL Acc. A0A103Y6T2]	-1.31523	1.22321e-07	8.54609e-07	9.81469	4.16689
Ccrd_024632	Uncharacterized protein [Uniprot/SPTREMBL Acc. A0A118JS05]	-1.31417	0.00127824	0.00398386	0.260428	0.109775
Ccrd_005272	EXS, C-terminal [Uniprot/SPTREMBL Acc. A0A118JV95]	-1.31341	4.18634e-07	2.65964e-06	6.08953	2.59216
Ccrd_009825	RING-type domain-containing protein [Uniprot/SPTREMBL Acc. A0A103YME5]	-1.3129	1.22662e-06	7.13862e-06	24.4232	10.6145
Ccrd_021717	C2 calcium-dependent membrane targeting [Uniprot/SPTREMBL Acc. A0A118JZK8]	-1.31272	2.45317e-12	3.13609e-11	4.67159	2.00197
Ccrd_018834	AB hydrolase-1 domain-containing protein [Uniprot/SPTREMBL Acc. A0A118K1Q5]	-1.31251	1.90261e-14	3.00855e-13	150.069	64.1231
Ccrd_010596		-1.31218	4.36448e-12	5.44897e-11	29.752	12.7958
Ccrd_021935	Protein kinase, ATP binding site-containing protein [Uniprot/SPTREMBL Acc. A0A103XZL8]	-1.31174	9.33472e-07	5.56829e-06	1.75021	0.744474
Ccrd_025666	AA_permease_C domain-containing protein [Uniprot/SPTREMBL Acc. A0A103VQC4]	-1.31171	3.02449e-10	3.07845e-09	112.077	48.5474
Ccrd_017634		-1.31167	4.43593e-07	2.80301e-06	64.3844	27.9868
Ccrd_023377	Multi antimicrobial extrusion protein [Uniprot/SPTREMBL Acc. A0A103XWZ8]	-1.30823	5.54535e-15	9.34159e-14	124.819	53.8347
Ccrd_020976	Transcription factor, K-box [Uniprot/SPTREMBL Acc. A0A103Y1L0]	-1.30729	0.00041153	0.00145176	3.94989	1.66825
Ccrd_011770	Peptidase A1 domain-containing protein [Uniprot/SPTREMBL Acc. A0A103YIR2]	-1.30688	0.00195265	0.00578644	3.76131	1.61898
Ccrd_014073		-1.30618	1.12574e-10	1.20015e-09	845.489	367.658
Ccrd_019292	CID domain-containing protein [Uniprot/SPTREMBL Acc. A0A103Y4L1]	-1.30607	1.5852e-09	1.46331e-08	9.74086	4.19062
Ccrd_011621	Prephenate/arogenate dehydrogenase domain-containing protein [Uniprot/SPTREMBL Acc. A0A103YJ34]	-1.30594	1.44541e-11	1.69308e-10	14.4232	6.25859
Ccrd_007750		-1.30588	0.00936715	0.0227691	1.46951	0.63005
Ccrd_005092	Adenylate kinase [Uniprot/SPTREMBL Acc. A0A103XLK2]	-1.30585	6.37657e-16	1.17556e-14	76.2651	33.1776
Ccrd_001247		-1.30534	0.00319429	0.0089179	4.85987	2.10933
Ccrd_005747	C2 calcium-dependent membrane targeting [Uniprot/SPTREMBL Acc. A0A103XK70]	-1.30376	3.00859e-09	2.68125e-08	20.3476	8.76326
Ccrd_009773	Cyclin_C_2 domain-containing protein [Uniprot/SPTREMBL Acc. A0A103YMK6]	-1.30362	3.8903e-13	5.35676e-12	5.77742	2.5092
Ccrd_009346	Ribosomal protein L1 [Uniprot/SPTREMBL Acc. A0A103YN90]	-1.30345	8.14848e-08	5.8603e-07	38.3831	16.9076
Ccrd_009457		-1.3016	2.69655e-05	0.000122789	1.3693	0.582307
Ccrd_026191	RNA-dependent RNA polymerase [Uniprot/SPTREMBL Acc. A0A118I203]	-1.30131	1.48985e-05	7.16493e-05	2.56839	1.10481
Ccrd_026258		-1.30009	0.00345383	0.0095515	2.78925	1.19158
Ccrd_017588	Uncharacterized protein [Uniprot/SPTREMBL Acc. A0A103Y7U5]	-1.29944	1.27649e-10	1.3534e-09	41.8737	18.3186
Ccrd_021835	Protein kinase domain-containing protein [Uniprot/SPTREMBL Acc. A0A103XZU7]	-1.29865	1.33171e-08	1.0782e-07	8.10377	3.551
Ccrd_014452	Protein kinase domain-containing protein [Uniprot/SPTREMBL Acc. A0A118K4A7]	-1.29855	0.00018936	0.000724437	1.35431	0.5773
Ccrd_001672		-1.29689	7.73363e-07	4.68842e-06	0.98352	0.428886
Ccrd_009798	T-complex protein 1 subunit delta [Uniprot/SPTREMBL Acc. A0A103YMF8]	-1.2959	1.69226e-09	1.55618e-08	21.4174	9.44975
Ccrd_019101	Protein kinase domain-containing protein [Uniprot/SPTREMBL Acc. A0A118K1C9]	-1.29588	0.0015622	0.00476436	2.04462	0.870111
Ccrd_020517		-1.29565	2.71361e-05	0.000123479	2.97866	1.31622
Ccrd_010115	Mitochondrial carrier domain-containing protein [Uniprot/SPTREMBL Acc. A0A118K6Z8]	-1.29474	2.47307e-07	1.63287e-06	56.0898	24.8001
Ccrd_009299	Hexosyltransferase [Uniprot/SPTREMBL Acc. A0A124SIC4]	-1.29388	8.02592e-17	1.61177e-15	55.3848	24.0644
Ccrd_002378	Terpene synthase, metal-binding domain-containing protein [Uniprot/SPTREMBL Acc. A0A103XRG2]	-1.29286	0.000558478	0.00190685	2.09586	0.930701
Ccrd_009882	Cyclic nucleotide-binding domain-containing protein [Uniprot/SPTREMBL Acc. A0A103YM48]	-1.29197	2.60211e-16	4.98734e-15	23.0384	10.0243
Ccrd_010662	Endoplasmic reticulum vesicle transporter, C-terminal [Uniprot/SPTREMBL Acc. A0A118K6M8]	-1.29154	2.48613e-15	4.34714e-14	81.3771	35.3377
Ccrd_023188	Laccase [Uniprot/SPTREMBL Acc. A0A103XX79]	-1.29142	2.33505e-10	2.39944e-09	14.9506	6.44688
Ccrd_005246	AAA+ ATPase domain-containing protein [Uniprot/SPTREMBL Acc. A0A103XLG9]	-1.29093	6.58535e-08	4.8149e-07	4.92404	2.13679
Ccrd_021333		-1.28903	7.22866e-14	1.07123e-12	76.0012	33.2231
Ccrd_017623		-1.28848	0.0043657	0.0117572	1.69741	0.760369
Ccrd_009812	Small GTPase superfamily, ARF/SAR type [Uniprot/SPTREMBL Acc. A0A103YMD0]	-1.28604	2.53102e-15	4.41365e-14	143.455	62.987
Ccrd_003307		-1.28535	1.28715e-07	8.94117e-07	5.34762	2.36233
Ccrd_016168	Nucleic acid-binding, OB-fold [Uniprot/SPTREMBL Acc. A0A103YAH8]	-1.28486	9.39688e-06	4.67644e-05	274.686	123.832
Ccrd_007279	Phytosulfokine-beta [Uniprot/SPTREMBL Acc. A0A118JTQ2]	-1.28466	4.94463e-09	4.29579e-08	18.057	7.97186
Ccrd_023510		-1.28427	6.43586e-09	5.48054e-08	65.8464	29.2497
Ccrd_005114	Abhydrolase_3 domain-containing protein [Uniprot/SPTREMBL Acc. A0A124SC64]	-1.28359	1.04931e-14	1.7168e-13	28.5647	12.5541
Ccrd_008948	Methylenetetrahydrofolate reductase [Uniprot/SPTREMBL Acc. A0A103XE54]	-1.28241	4.34249e-13	5.94088e-12	229.665	100.946
Ccrd_024362		-1.28217	1.74297e-12	2.2592e-11	1.49935	0.659007
Ccrd_005771		-1.28078	1.13301e-06	6.65188e-06	34.7986	15.3531
Ccrd_005820		-1.28038	3.05995e-09	2.72576e-08	45.2833	20.2229
Ccrd_018742	Thioredoxin reductase [Uniprot/SPTREMBL Acc. A0A103Y5L6]	-1.28034	4.1025e-12	5.13849e-11	296.463	131.487
Ccrd_014927	SASA domain-containing protein [Uniprot/SPTREMBL Acc. A0A118K3Z5]	-1.27866	4.59784e-06	2.42878e-05	52.2662	23.4977
Ccrd_008990	RING-type domain-containing protein [Uniprot/SPTREMBL Acc. A0A103XE19]	-1.27826	0.0208559	0.0454408	1.58536	0.717329
Ccrd_013782	DUF4220 domain-containing protein [Uniprot/SPTREMBL Acc. A0A103YEY8]	-1.27788	0.00178643	0.00535128	0.893875	0.39248
Ccrd_020185		-1.27753	4.6387e-08	3.4757e-07	74.8214	33.701
Ccrd_009330	Dual specificity phosphatase [Uniprot/SPTREMBL Acc. A0A103YNB2]	-1.27697	3.28167e-16	6.2342e-15	82.9372	36.6097
Ccrd_013002	GTD-binding domain-containing protein [Uniprot/SPTREMBL Acc. A0A103YGE1]	-1.27695	8.95425e-07	5.35952e-06	51.2094	22.9401
Ccrd_007880	RING-type domain-containing protein [Uniprot/SPTREMBL Acc. A0A124SBA3]	-1.27675	0.0128666	0.0299974	4.90463	2.15505
Ccrd_024501	U6 snRNA-associated Sm-like protein LSm3 [Uniprot/SPTREMBL Acc. A0A103YMA2]	-1.27494	4.99666e-09	4.33514e-08	27.8626	12.3551
Ccrd_018259		-1.27386	1.41066e-07	9.70157e-07	42.8734	19.2621
Ccrd_008464		-1.27323	7.28094e-05	0.000303265	3.05703	1.3547
Ccrd_024989	FAD-binding PCMH-type domain-containing protein [Uniprot/SPTREMBL Acc. A0A103XBM2]	-1.27288	1.15476e-09	1.08671e-08	38.9029	17.4774
Ccrd_011238	Glycosyl-phosphatidyl inositol-anchored, plant [Uniprot/SPTREMBL Acc. A0A103YJR7]	-1.27272	0.00040912	0.0014442	1.78872	0.7949
Ccrd_001685		-1.27243	1.92092e-07	1.29348e-06	28.0189	12.5131
Ccrd_000453		-1.27219	4.3745e-06	2.32222e-05	24.3366	10.728
Ccrd_007951	Peptidase S8/S53 domain-containing protein [Uniprot/SPTREMBL Acc. A0A124SBA6]	-1.27161	2.33623e-14	3.65538e-13	10.8277	4.79084
Ccrd_009419	Usp domain-containing protein [Uniprot/SPTREMBL Acc. A0A103YN60]	-1.27135	2.12389e-14	3.34206e-13	119.328	52.646
Ccrd_015967		-1.27077	1.2345e-09	1.15668e-08	45.4115	20.1062
Ccrd_018327	PfkB domain-containing protein [Uniprot/SPTREMBL Acc. A0A118K1V1]	-1.26989	5.05471e-09	4.38158e-08	7.85088	3.51054
Ccrd_010385	Uncharacterized protein [Uniprot/SPTREMBL Acc. A0A118K6U4]	-1.26823	0.0217263	0.0470668	1.56364	0.699507
Ccrd_009908	Ribonucloprotein [Uniprot/SPTREMBL Acc. A0A103YMB8]	-1.26797	1.30695e-08	1.06e-07	75.7523	34.1477
Ccrd_002081		-1.26764	0.00327671	0.00911906	1.54837	0.700776
Ccrd_009402	Presenilin [Uniprot/SPTREMBL Acc. A0A118K7E8]	-1.26739	1.40525e-06	8.10741e-06	12.9197	5.78342
Ccrd_009103	Dephospho-CoA kinase [Uniprot/SPTREMBL Acc. A0A103YNM9]	-1.26686	4.41538e-09	3.86376e-08	15.6141	6.87565
Ccrd_002623	PKS_KS domain-containing protein [Uniprot/SPTREMBL Acc. A0A103XR17]	-1.26639	0.00117838	0.00370886	1.48449	0.646609
Ccrd_026494	Laccase [Uniprot/SPTREMBL Acc. A0A118H552]	-1.26537	8.1918e-07	4.94448e-06	6.028	2.66436
Ccrd_024036		-1.26445	1.34607e-08	1.08783e-07	39.869	17.8406
Ccrd_017537	Squalene/phytoene synthase [Uniprot/SPTREMBL Acc. A0A103Y7W1]	-1.26353	0.000301077	0.0010988	5.75236	2.51378
Ccrd_017028		-1.26313	7.25236e-09	6.12461e-08	48.4468	21.8715
Ccrd_025951	Glutathione S-transferase/chloride channel, C-terminal [Uniprot/SPTREMBL Acc. A0A103TAX1]	-1.26247	1.09546e-13	1.60372e-12	59.9777	26.5879
Ccrd_003840	ALOG domain-containing protein [Uniprot/SPTREMBL Acc. A0A103XNQ4]	-1.26246	0.000512917	0.00177004	10.1794	4.60151
Ccrd_005464	WRKY domain-containing protein [Uniprot/SPTREMBL Acc. A0A103XKP5]	-1.26244	3.04632e-12	3.8606e-11	135.836	61.2388
Ccrd_021776	Elongation factor 1-alpha [Uniprot/SPTREMBL Acc. A0A103Y006]	-1.2611	1.32898e-11	1.56524e-10	134.447	60.5756
Ccrd_009790	U6 snRNA-associated Sm-like protein LSm3 [Uniprot/SPTREMBL Acc. A0A103YMA2]	-1.26083	1.27476e-08	1.038e-07	24.5617	11.0328
Ccrd_000490	CYC/TB1, R domain-containing protein [Uniprot/SPTREMBL Acc. A0A118JY85]	-1.26079	0.0175519	0.0391597	2.15225	0.941612
Ccrd_009661	Neutral ceramidase [Uniprot/SPTREMBL Acc. A0A118K7A2]	-1.26056	3.08809e-15	5.3322e-14	39.5177	17.5859
Ccrd_020119		-1.25864	1.17878e-07	8.25959e-07	5.92051	2.62337
Ccrd_008542	Non-specific serine/threonine protein kinase [Uniprot/SPTREMBL Acc. A0A103XEZ6]	-1.25803	0.00267846	0.00764217	1.57315	0.711505
Ccrd_005100	Uncharacterized protein [Uniprot/SPTREMBL Acc. A0A118JVC4]	-1.25724	3.3306e-15	5.73047e-14	32.4724	14.5415
Ccrd_018261	23 kDa subunit of oxygen evolving system of photosystem II [Uniprot/SPTREMBL Acc. A0A124SFJ3]	-1.25702	8.75897e-06	4.38493e-05	4.51301	2.02685
Ccrd_010296	Uncharacterized protein [Uniprot/SPTREMBL Acc. A0A118K6W2]	-1.25655	4.01777e-05	0.00017647	4.54298	2.04488
Ccrd_017411		-1.25644	1.21834e-06	7.09898e-06	264.344	120.503
Ccrd_025713	Glycosyltransferase [Uniprot/SPTREMBL Acc. A0A118J352]	-1.25483	2.0108e-06	1.13175e-05	4.27508	1.91724
Ccrd_014594	Concanavalin A-like lectin/glucanase superfamily [Uniprot/SPTREMBL Acc. A0A124SGP4]	-1.25452	0.000325387	0.0011784	6.58097	2.90484
Ccrd_010166	Glutathione S-transferase/chloride channel, C-terminal [Uniprot/SPTREMBL Acc. A0A103YLV8]	-1.25451	1.76674e-11	2.04838e-10	103.491	45.9979
Ccrd_010932		-1.25419	0.0227369	0.0488619	1.76906	0.795212
Ccrd_005268		-1.25368	3.72864e-08	2.83444e-07	6.55872	2.90828
Ccrd_015741	Lipase_GDSL domain-containing protein [Uniprot/SPTREMBL Acc. A0A118K3F6]	-1.25312	0.007186	0.018121	1.28944	0.568039
Ccrd_016420	Delta(24)-sterol reductase [Uniprot/SPTREMBL Acc. A0A124SG43]	-1.25274	6.55462e-14	9.75826e-13	170.664	77.0938
Ccrd_009567	Probable cytosolic iron-sulfur protein assembly protein CIAO1 homolog [Uniprot/SPTREMBL Acc. A0A103YMQ4]	-1.25186	7.88041e-15	1.30591e-13	48.8073	21.974
Ccrd_026413		-1.25134	3.2782e-07	2.11818e-06	33.0665	14.9961
Ccrd_022453	Uncharacterized protein [Uniprot/SPTREMBL Acc. A0A103XYT0]	-1.25066	0.000694394	0.00231812	27.1743	12.3562
Ccrd_014816		-1.25061	6.82508e-09	5.78144e-08	72.0371	31.8466
Ccrd_005226	Pre-mRNA cleavage complex II Clp1 [Uniprot/SPTREMBL Acc. A0A103XL56]	-1.24994	1.26103e-15	2.26016e-14	29.195	13.1507
Ccrd_010047	Ribosomal_L18_c domain-containing protein [Uniprot/SPTREMBL Acc. A0A103YM03]	-1.2495	1.31319e-13	1.90846e-12	505.463	227.479
Ccrd_020701	NADH:ubiquinone reductase (non-electrogenic) [Uniprot/SPTREMBL Acc. A0A103Y1Z1]	-1.2495	1.94028e-05	9.10532e-05	6.25179	2.79944
Ccrd_005269	NAC domain-containing protein [Uniprot/SPTREMBL Acc. A0A103XKX7]	-1.24919	1.25718e-12	1.65957e-11	33.6561	15.0861
Ccrd_022754	Protein kinase domain-containing protein [Uniprot/SPTREMBL Acc. A0A118JYZ7]	-1.24915	6.64626e-09	5.63984e-08	2.72045	1.22866
Ccrd_019916	UCR_hinge domain-containing protein [Uniprot/SPTREMBL Acc. A0A103Y3F1]	-1.24876	7.95302e-12	9.60419e-11	192.059	87.3271
Ccrd_017136	Uncharacterized protein [Uniprot/SPTREMBL Acc. A0A103Y8M4]	-1.24776	5.56552e-16	1.03194e-14	25.0173	11.2761
Ccrd_026867		-1.24757	4.04421e-06	2.15814e-05	7.82833	3.47562
Ccrd_014771		-1.24689	6.05955e-08	4.45404e-07	54.4936	24.8647
Ccrd_010384	WRKY domain-containing protein [Uniprot/SPTREMBL Acc. A0A118K6T8]	-1.24666	1.26802e-11	1.50259e-10	15.1404	6.78162
Ccrd_009770	Primosome PriB/single-strand DNA-binding [Uniprot/SPTREMBL Acc. A0A103YMM7]	-1.24599	5.53297e-12	6.79379e-11	22.9261	10.3381
Ccrd_009788		-1.24509	8.87618e-08	6.35059e-07	18.186	8.20622
Ccrd_010061	AP2/ERF domain-containing protein [Uniprot/SPTREMBL Acc. A0A103YLZ4]	-1.24401	3.02345e-07	1.96539e-06	92.413	42.674
Ccrd_010138	UbiA prenyltransferase family [Uniprot/SPTREMBL Acc. A0A103YLP4]	-1.24394	2.35678e-13	3.33171e-12	46.8363	21.2607
Ccrd_009266	GB1/RHD3-type G domain-containing protein [Uniprot/SPTREMBL Acc. A0A103YNE3]	-1.24288	0.000987838	0.00316655	1.22009	0.550337
Ccrd_009150	40S ribosomal protein S24 [Uniprot/SPTREMBL Acc. A0A103YNN1]	-1.24277	7.91243e-15	1.31009e-13	61.7393	27.9122
Ccrd_025125	Cytochrome P450 [Uniprot/SPTREMBL Acc. A0A124SAI5]	-1.24226	1.38476e-08	1.11583e-07	3.25352	1.47308
Ccrd_010332	Uncharacterized protein [Uniprot/SPTREMBL Acc. A0A103YLK3]	-1.24169	3.64752e-05	0.000161417	7.52849	3.42687
Ccrd_017124	PKS_ER domain-containing protein [Uniprot/SPTREMBL Acc. A0A103Y8N6]	-1.24081	1.47407e-13	2.13217e-12	59.306	26.7399
Ccrd_010432	Uncharacterized protein [Uniprot/SPTREMBL Acc. A0A118K6T6]	-1.2406	2.94442e-09	2.6277e-08	4.15106	1.90306
Ccrd_014578	Alpha-galactosidase [Uniprot/SPTREMBL Acc. A0A118K477]	-1.23913	3.29288e-13	4.57808e-12	19.8321	8.93084
Ccrd_005831	Peptidase S8/S53 domain-containing protein [Uniprot/SPTREMBL Acc. A0A103XJY9]	-1.23879	4.85562e-11	5.39051e-10	13.1019	5.95828
Ccrd_020059	Uncharacterized protein [Uniprot/SPTREMBL Acc. A0A118K0Q3]	-1.23857	0.000276837	0.00101996	21.5658	9.66456
Ccrd_013142	1,3-beta-glucan synthase [Uniprot/SPTREMBL Acc. A0A124SH59]	-1.23804	0.000382879	0.00136463	0.424936	0.188804
Ccrd_010033	DAO domain-containing protein [Uniprot/SPTREMBL Acc. A0A118K732]	-1.23793	1.75581e-11	2.03815e-10	7.89068	3.58811
Ccrd_009364		-1.23657	4.66322e-09	4.06591e-08	17.4188	7.87155
Ccrd_005792	S-acyltransferase [Uniprot/SPTREMBL Acc. A0A103XK34]	-1.236	6.15168e-14	9.19376e-13	45.4707	20.6104
Ccrd_011419	Glycoside hydrolase, catalytic domain-containing protein [Uniprot/SPTREMBL Acc. A0A103YJB2]	-1.23564	1.1167e-08	9.18973e-08	827.832	374.71
Ccrd_006685	START domain-containing protein [Uniprot/SPTREMBL Acc. A0A103XIC4]	-1.23429	1.31588e-07	9.12434e-07	79.4984	36.707
Ccrd_009183	Signal recognition particle 9 kDa protein [Uniprot/SPTREMBL Acc. A0A118K7K2]	-1.23427	2.45156e-12	3.13609e-11	37.6237	17.123
Ccrd_001330	Uncharacterized protein [Uniprot/SPTREMBL Acc. A0A103XTI9]	-1.23359	1.15465e-06	6.76866e-06	7.86086	3.56834
Ccrd_005113		-1.23292	9.79781e-14	1.43654e-12	129.792	59.4109
Ccrd_004720	Adenylyl cyclase-associated protein [Uniprot/SPTREMBL Acc. A0A103XLY7]	-1.23249	5.83931e-11	6.41628e-10	189.438	87.3255
Ccrd_005785	Kinesin-like protein [Uniprot/SPTREMBL Acc. A0A103XK64]	-1.23128	5.7115e-05	0.000243561	2.52876	1.14139
Ccrd_010421		-1.23054	2.58725e-07	1.70302e-06	8.86962	4.01865
Ccrd_010621	BYPASS-related protein [Uniprot/SPTREMBL Acc. A0A103YKT0]	-1.22996	0.0117838	0.0278966	1.19213	0.534111
Ccrd_013988	Pyrophosphate--fructose 6-phosphate 1-phosphotransferase subunit alpha [Uniprot/SPTREMBL Acc. A0A118K4J6]	-1.22986	6.4636e-15	1.07851e-13	47.5834	21.6013
Ccrd_016773		-1.22977	1.04892e-09	9.92909e-09	45.178	20.7308
Ccrd_009223	Ribosomal protein L2 domain 2 [Uniprot/SPTREMBL Acc. A0A103YNH0]	-1.22957	1.72255e-14	2.735e-13	230.898	105.691
Ccrd_017841	Protein kinase domain-containing protein [Uniprot/SPTREMBL Acc. A0A118K262]	-1.22891	0.00458543	0.0122703	0.868316	0.403697
Ccrd_010361	Uncharacterized protein [Uniprot/SPTREMBL Acc. A0A103YLA2]	-1.22775	7.23552e-10	6.98242e-09	15.7419	7.20316
Ccrd_011159	Receptor-like serine/threonine-protein kinase [Uniprot/SPTREMBL Acc. A0A103YJV2]	-1.22747	1.36549e-08	1.1026e-07	12.5394	5.71322
Ccrd_008237	Lipase_3 domain-containing protein [Uniprot/SPTREMBL Acc. A0A103XFH3]	-1.22735	4.78591e-06	2.52235e-05	17.1817	7.95622
Ccrd_009565	Aldolase-type TIM barrel [Uniprot/SPTREMBL Acc. A0A118K7D0]	-1.22733	3.55495e-05	0.000157682	7.77418	3.52818
Ccrd_023803	Homeobox domain-containing protein [Uniprot/SPTREMBL Acc. A0A103XW58]	-1.22728	1.17342e-15	2.10703e-14	32.362	14.7573
Ccrd_021533	RING-type domain-containing protein [Uniprot/SPTREMBL Acc. A0A124SEI2]	-1.2271	0.00952882	0.0231301	2.73713	1.22822
Ccrd_005807	Protein kinase domain-containing protein [Uniprot/SPTREMBL Acc. A0A103XK42]	-1.22651	3.4384e-14	5.29e-13	29.9737	13.6835
Ccrd_003272	UDP-glucuronosyl/UDP-glucosyltransferase [Uniprot/SPTREMBL Acc. A0A103XPP7]	-1.22507	0.00787784	0.0195998	1.688	0.780696
Ccrd_008703		-1.22506	5.66611e-07	3.5031e-06	46.2497	21.5669
Ccrd_002233		-1.22431	0.0192155	0.0423438	1.96866	0.923987
Ccrd_010119	Cytochrome b-c1 complex subunit 8 [Uniprot/SPTREMBL Acc. A0A103YLQ1]	-1.22388	7.12482e-10	6.8859e-09	253.313	116.179
Ccrd_024343		-1.22378	9.00097e-05	0.000368479	3.33432	1.53476
Ccrd_013268		-1.22375	4.74203e-06	2.50153e-05	7.3376	3.37952
Ccrd_011902		-1.22301	5.50987e-07	3.41633e-06	6.6878	3.1016
Ccrd_016247		-1.22227	2.22548e-09	2.01681e-08	76.8666	35.586
Ccrd_009772	Nucleic acid-binding, OB-fold [Uniprot/SPTREMBL Acc. A0A103YMI1]	-1.2209	3.97188e-13	5.45154e-12	45.9943	21.2542
Ccrd_002330	GGACT domain-containing protein [Uniprot/SPTREMBL Acc. A0A103XRM3]	-1.22041	1.33362e-07	9.24076e-07	16.3054	7.46224
Ccrd_016250		-1.21971	1.39694e-14	2.24567e-13	34.7956	15.949
Ccrd_024113	Concanavalin A-like lectin/glucanase, subgroup [Uniprot/SPTREMBL Acc. A0A124SAR5]	-1.21963	1.36519e-05	6.60529e-05	2.92931	1.33743
Ccrd_022775	Uncharacterized protein [Uniprot/SPTREMBL Acc. A0A103XY18]	-1.21885	8.59254e-08	6.15905e-07	5.18026	2.36934
Ccrd_018145	Protein kinase domain-containing protein [Uniprot/SPTREMBL Acc. A0A103Y6T5]	-1.21806	4.01771e-08	3.03747e-07	55.5218	25.4747
Ccrd_005996	AP2/ERF domain-containing protein [Uniprot/SPTREMBL Acc. A0A103XJN0]	-1.21785	6.96688e-05	0.000291755	13.5158	6.26683
Ccrd_009824		-1.21744	7.97226e-06	4.02863e-05	7.80832	3.55829
Ccrd_005229	Eukaryotic porin/Tom40 [Uniprot/SPTREMBL Acc. A0A103XL93]	-1.21699	1.28187e-09	1.19701e-08	321.254	150.164
Ccrd_014947	Protein kinase domain-containing protein [Uniprot/SPTREMBL Acc. A0A103YCS0]	-1.21668	1.6865e-05	8.02542e-05	6.83964	3.11853
Ccrd_003063		-1.21604	0.017124	0.0383509	3.46327	1.58876
Ccrd_021697	Uncharacterized protein [Uniprot/SPTREMBL Acc. A0A103Y022]	-1.21602	7.78335e-11	8.43262e-10	62.5566	28.7489
Ccrd_024031	AP2/ERF domain-containing protein [Uniprot/SPTREMBL Acc. A0A103XCR6]	-1.21566	0.00190719	0.00567084	8.26595	3.78376
Ccrd_010616	WD_REPEATS_REGION domain-containing protein [Uniprot/SPTREMBL Acc. A0A118K6P4]	-1.21231	0.000254049	0.000944274	3.33354	1.54242
Ccrd_025149	Uncharacterized protein [Uniprot/SPTREMBL Acc. A0A103XBB9]	-1.21195	3.49878e-14	5.37008e-13	45.2376	20.8484
Ccrd_010768	Ribosomal protein S14 [Uniprot/SPTREMBL Acc. A0A103YKL0]	-1.21181	8.5745e-06	4.30037e-05	312.386	148.129
Ccrd_018093	Metallothionein, family 15, plant [Uniprot/SPTREMBL Acc. A0A118K1Z6]	-1.21178	3.15759e-06	1.70906e-05	706.94	335.195
Ccrd_009852		-1.21166	1.69518e-09	1.55672e-08	41.8803	19.1714
Ccrd_009410	S-acyltransferase [Uniprot/SPTREMBL Acc. A0A103YN77]	-1.21116	1.22806e-05	5.98673e-05	5.72919	2.60656
Ccrd_009323	40S ribosomal protein S30 [Uniprot/SPTREMBL Acc. A0A103YNC0]	-1.21115	4.48534e-08	3.3647e-07	590.701	276.604
Ccrd_017293	Glucosamine 6-phosphate N-acetyltransferase [Uniprot/SPTREMBL Acc. A0A103Y8D4]	-1.21115	7.97584e-05	0.000329794	1.35349	0.615269
Ccrd_013941	Concanavalin A-like lectin/glucanase, subgroup [Uniprot/SPTREMBL Acc. A0A103YEN0]	-1.2106	3.43455e-10	3.47208e-09	24.7145	11.35
Ccrd_014587		-1.21053	5.66002e-05	0.000241738	2.54008	1.18436
Ccrd_026709		-1.20921	0.00311856	0.00873548	5.33989	2.4414
Ccrd_016244	Auxin efflux carrier component [Uniprot/SPTREMBL Acc. A0A103YAE3]	-1.20763	1.30436e-09	1.21684e-08	11.1287	5.16011
Ccrd_006946	Methyltransferase type 11 [Uniprot/SPTREMBL Acc. A0A124SBL6]	-1.20754	3.93813e-07	2.51186e-06	6.95691	3.23459
Ccrd_003743		-1.2069	1.99608e-08	1.56665e-07	112.572	52.7724
Ccrd_010299	Non-reducing end alpha-L-arabinofuranosidase [Uniprot/SPTREMBL Acc. A0A103YLH8]	-1.20669	6.25051e-11	6.84477e-10	14.3226	6.61352
Ccrd_015240	Chlorophyll a-b binding protein, chloroplastic [Uniprot/SPTREMBL Acc. A0A103YC81]	-1.20655	3.44503e-07	2.2193e-06	14.3575	6.73788
Ccrd_026751	Uncharacterized protein [Uniprot/SPTREMBL Acc. A0A124SAS9]	-1.20636	1.41019e-14	2.2632e-13	138.594	64.2775
Ccrd_019680		-1.20601	5.98798e-10	5.83089e-09	28.1212	13.0922
Ccrd_005746		-1.20557	5.27207e-10	5.17284e-09	25.8957	12.0679
Ccrd_005131		-1.20467	3.72622e-10	3.74734e-09	23.3285	10.8351
[truncated: 2,858 more rows]

## Sheet: L18 UP
Gene ID	Gene description	logFC	P-value	FDR	Mean FPKM reference	Mean FPKM query
[truncated: 2,760 more rows]

[truncated: 7 more sheets: L18 DOWN, L24 UP, L24 DOWN, core_DOWN, L1.L18.L24 UP, core_DEGs-UP_FC>1, core_DEGs-DOWN_FC<-1]
