# Supplementary material for: Towards a Cardoon (Cynara cardunculus var. altilis)-Based Biorefinery: A Case Study of Improved Cell Cultures via Genetic Modulation of the Phenylpropanoid Pathway
Source: Int J Mol Sci. 2021 Nov 5;22(21):11978. doi: 10.3390/ijms222111978 (PMC8584892; doi:10.3390/ijms222111978)
Supplement: Supplementary file 1 [file ijms-22-11978-s001.zip › Table S3 - Lists of GO terms.xlsx]

## Sheet: GOEA_DOWN_core-DEGs
GO_ID	GO_Category	GO_Description	Query_Total	Query_Item	BG_Total	BG_Item	p_value	FDR	E_Score	Genes
GO:0034709	cellular_component	methylosome	1086	1	20452	1	0	0	18.8324	Ccrd_025430
GO:0031209	cellular_component	SCAR complex	1086	1	20452	1	0	0	18.8324	Ccrd_005566
GO:0016688	molecular_function	L-ascorbate peroxidase activity	1086	3	20452	4	7.90864e-06	8.87101e-05	14.1243	Ccrd_001889;Ccrd_017609;Ccrd_009572
GO:0006879	biological_process	cellular iron ion homeostasis	1086	3	20452	5	3.78692e-05	0.00041478	11.2994	Ccrd_005895;Ccrd_016842;Ccrd_010194
GO:1900426	biological_process	positive regulation of defense response to bacterium	1086	2	20452	4	0.000573592	0.00508584	9.41621	Ccrd_018121;Ccrd_025835
GO:0030170	molecular_function	pyridoxal phosphate binding	1086	14	20452	88	5.64732e-05	0.000611355	2.99607	Ccrd_022093;Ccrd_005739;Ccrd_009934;Ccrd_002553;Ccrd_010268;Ccrd_009461;Ccrd_010654;Ccrd_017402;Ccrd_017396;Ccrd_026121;Ccrd_005270;Ccrd_014117;Ccrd_023668;Ccrd_018243
GO:0001708	biological_process	cell fate specification	1086	2	20452	4	0.000573592	0.00508584	9.41621	Ccrd_007093;Ccrd_022110
GO:0004045	molecular_function	aminoacyl-tRNA hydrolase activity	1086	3	20452	6	0.000108807	0.00115113	9.41621	Ccrd_007104;Ccrd_014085;Ccrd_021635
GO:0005743	cellular_component	mitochondrial inner membrane	1086	16	20452	116	0.000132396	0.00138495	2.59757	Ccrd_009329;Ccrd_017556;Ccrd_017543;Ccrd_022343;Ccrd_005109;Ccrd_005103;Ccrd_005119;Ccrd_010237;Ccrd_019916;Ccrd_005547;Ccrd_009599;Ccrd_010119;Ccrd_021666;Ccrd_018418;Ccrd_005511;Ccrd_005628
GO:0016841	molecular_function	ammonia-lyase activity	1086	2	20452	3	0.000149329	0.00152775	12.5549	Ccrd_007512;Ccrd_014855
GO:0003824	molecular_function	catalytic activity	1086	72	20452	897	0.000184712	0.00186921	1.51163	Ccrd_008430;Ccrd_009422;Ccrd_022093;Ccrd_009329;Ccrd_009333;Ccrd_005739;Ccrd_005749;Ccrd_005730;Ccrd_010504;Ccrd_008457;Ccrd_018690;Ccrd_002017;Ccrd_024368;Ccrd_010279;Ccrd_009933;Ccrd_009934;Ccrd_008822;Ccrd_015577;Ccrd_018671;Ccrd_022051;Ccrd_015556;Ccrd_005138;Ccrd_005073;Ccrd_005090;Ccrd_020091;Ccrd_001862;Ccrd_018719;Ccrd_021527;Ccrd_017455;Ccrd_010669;Ccrd_007512;Ccrd_009227;Ccrd_020551;Ccr…
GO:0004619	molecular_function	phosphoglycerate mutase activity	1086	3	20452	7	0.000243175	0.00240847	8.07103	Ccrd_005730;Ccrd_009933;Ccrd_023211
GO:0006826	biological_process	iron ion transport	1086	2	20452	4	0.000573592	0.00508584	9.41621	Ccrd_016842;Ccrd_010194
GO:0005509	molecular_function	calcium ion binding	1086	27	20452	265	0.00042329	0.00414824	1.91877	Ccrd_019153;Ccrd_009336;Ccrd_024071;Ccrd_005788;Ccrd_009851;Ccrd_024365;Ccrd_005575;Ccrd_015241;Ccrd_012517;Ccrd_018227;Ccrd_023689;Ccrd_005091;Ccrd_009411;Ccrd_023262;Ccrd_018261;Ccrd_025178;Ccrd_005660;Ccrd_025429;Ccrd_017652;Ccrd_007437;Ccrd_019530;Ccrd_017583;Ccrd_007108;Ccrd_002113;Ccrd_013189;Ccrd_018242;Ccrd_015271
GO:0002229	biological_process	defense response to oomycetes	1086	2	20452	5	0.00137717	0.0106846	7.53297	Ccrd_017043;Ccrd_025835
GO:0006559	biological_process	L-phenylalanine catabolic process	1086	2	20452	5	0.00137717	0.0106846	7.53297	Ccrd_007512;Ccrd_014855
GO:0045548	molecular_function	phenylalanine ammonia-lyase activity	1086	2	20452	4	0.000573592	0.00508584	9.41621	Ccrd_007512;Ccrd_014855
GO:0009072	biological_process	aromatic amino acid family metabolic process	1086	3	20452	8	0.000465874	0.00447143	7.06215	Ccrd_010279;Ccrd_020091;Ccrd_026256
GO:0008199	molecular_function	ferric iron binding	1086	2	20452	4	0.000573592	0.00508584	9.41621	Ccrd_016842;Ccrd_010194
GO:0017057	molecular_function	6-phosphogluconolactonase activity	1086	2	20452	4	0.000573592	0.00508584	9.41621	Ccrd_017043;Ccrd_020413
GO:0015297	molecular_function	antiporter activity	1086	9	20452	55	0.000563329	0.00508584	3.08167	Ccrd_024175;Ccrd_021178;Ccrd_017297;Ccrd_023377;Ccrd_018732;Ccrd_010052;Ccrd_001058;Ccrd_016102;Ccrd_018115
GO:0009809	biological_process	lignin biosynthetic process	1086	5	20452	15	7.30962e-05	0.000782214	6.27747	Ccrd_004659;Ccrd_016862;Ccrd_019031;Ccrd_002194;Ccrd_012615
GO:0009423	biological_process	chorismate biosynthetic process	1086	4	20452	12	0.000242087	0.00240847	6.27747	Ccrd_002017;Ccrd_008822;Ccrd_022051;Ccrd_001687
GO:0004322	molecular_function	ferroxidase activity	1086	2	20452	4	0.000573592	0.00508584	9.41621	Ccrd_016842;Ccrd_010194
GO:0042538	biological_process	hyperosmotic salinity response	1086	3	20452	9	0.000803335	0.00698977	6.27747	Ccrd_025038;Ccrd_009462;Ccrd_001771
GO:0009415	biological_process	response to water	1086	2	20452	6	0.00264554	0.0131797	6.27747	Ccrd_014315;Ccrd_012817
GO:0015238	molecular_function	drug transmembrane transporter activity	1086	7	20452	39	0.00086905	0.00735533	3.38018	Ccrd_024175;Ccrd_021178;Ccrd_017297;Ccrd_023377;Ccrd_018732;Ccrd_010052;Ccrd_001058
GO:0009699	biological_process	phenylpropanoid biosynthetic process	1086	3	20452	10	0.00128273	0.0103846	5.64972	Ccrd_004659;Ccrd_019031;Ccrd_012615
GO:0042910	molecular_function	xenobiotic transporter activity	1086	7	20452	39	0.00086905	0.00735533	3.38018	Ccrd_024175;Ccrd_021178;Ccrd_017297;Ccrd_023377;Ccrd_018732;Ccrd_010052;Ccrd_001058
GO:0080143	biological_process	regulation of amino acid export	1086	2	20452	7	0.00444732	0.0197164	5.38069	Ccrd_009815;Ccrd_009814
GO:0033014	biological_process	tetrapyrrole biosynthetic process	1086	2	20452	7	0.00444732	0.0197164	5.38069	Ccrd_005832;Ccrd_017240
GO:0016868	molecular_function	intramolecular transferase activity, phosphotransferases	1086	3	20452	10	0.00128273	0.0103846	5.64972	Ccrd_005730;Ccrd_023211;Ccrd_016224
GO:0030042	biological_process	actin filament depolymerization	1086	4	20452	15	0.00080303	0.00698977	5.02198	Ccrd_014708;Ccrd_016730;Ccrd_009602;Ccrd_017606
GO:0042409	molecular_function	caffeoyl-CoA O-methyltransferase activity	1086	3	20452	10	0.00128273	0.0103846	5.64972	Ccrd_004659;Ccrd_019031;Ccrd_012615
GO:0006098	biological_process	pentose-phosphate shunt	1086	5	20452	20	0.00045018	0.00436581	4.7081	Ccrd_017043;Ccrd_005090;Ccrd_012641;Ccrd_002194;Ccrd_020413
GO:0008177	molecular_function	succinate dehydrogenase (ubiquinone) activity	1086	2	20452	5	0.00137717	0.0106846	7.53297	Ccrd_005119;Ccrd_005628
GO:0006782	biological_process	protoporphyrinogen IX biosynthetic process	1086	3	20452	12	0.00277597	0.0131797	4.7081	Ccrd_005095;Ccrd_005832;Ccrd_017240
GO:0003856	molecular_function	3-dehydroquinate synthase activity	1086	2	20452	5	0.00137717	0.0106846	7.53297	Ccrd_025819;Ccrd_005241
GO:0016998	biological_process	cell wall macromolecule catabolic process	1086	3	20452	12	0.00277597	0.0131797	4.7081	Ccrd_005812;Ccrd_006705;Ccrd_026859
GO:0010089	biological_process	xylem development	1086	2	20452	8	0.00683618	0.0256427	4.7081	Ccrd_016862;Ccrd_022110
GO:0005783	cellular_component	endoplasmic reticulum	1086	27	20452	290	0.00170373	0.0130014	1.75336	Ccrd_009291;Ccrd_009266;Ccrd_009197;Ccrd_017132;Ccrd_005074;Ccrd_019690;Ccrd_001862;Ccrd_009358;Ccrd_009756;Ccrd_024965;Ccrd_010581;Ccrd_009053;Ccrd_021864;Ccrd_005398;Ccrd_009447;Ccrd_010362;Ccrd_005830;Ccrd_017585;Ccrd_017591;Ccrd_007093;Ccrd_005260;Ccrd_023668;Ccrd_005872;Ccrd_017001;Ccrd_016995;Ccrd_010594;Ccrd_017903
GO:0004568	molecular_function	chitinase activity	1086	3	20452	12	0.00277597	0.0131797	4.7081	Ccrd_005812;Ccrd_006705;Ccrd_026859
GO:0061617	cellular_component	MICOS complex	1086	1	20452	2	0.00281715	0.0131797	9.41621	Ccrd_022343
GO:0016853	molecular_function	isomerase activity	1086	19	20452	184	0.00189687	0.0131797	1.94465	Ccrd_019214;Ccrd_005730;Ccrd_012528;Ccrd_009933;Ccrd_005138;Ccrd_005090;Ccrd_017339;Ccrd_009811;Ccrd_023211;Ccrd_025866;Ccrd_017910;Ccrd_016224;Ccrd_017589;Ccrd_007097;Ccrd_018896;Ccrd_018895;Ccrd_005710;Ccrd_017237;Ccrd_010594
GO:0030532	cellular_component	small nuclear ribonucleoprotein complex	1086	1	20452	2	0.00281715	0.0131797	9.41621	Ccrd_009088
GO:0006469	biological_process	negative regulation of protein kinase activity	1086	2	20452	8	0.00683618	0.0256427	4.7081	Ccrd_012564;Ccrd_010818
GO:0005544	molecular_function	calcium-dependent phospholipid binding	1086	3	20452	12	0.00277597	0.0131797	4.7081	Ccrd_005747;Ccrd_007437;Ccrd_007108
GO:0004197	molecular_function	cysteine-type endopeptidase activity	1086	3	20452	11	0.00193134	0.0131797	5.13611	Ccrd_021864;Ccrd_007093;Ccrd_017011
GO:0097361	cellular_component	CIA complex	1086	1	20452	2	0.00281715	0.0131797	9.41621	Ccrd_009567
GO:0031515	cellular_component	tRNA (m1A) methyltransferase complex	1086	1	20452	2	0.00281715	0.0131797	9.41621	Ccrd_005158
GO:0006783	biological_process	heme biosynthetic process	1086	2	20452	8	0.00683618	0.0256427	4.7081	Ccrd_005095;Ccrd_017240
GO:0047769	molecular_function	arogenate dehydratase activity	1086	2	20452	6	0.00264554	0.0131797	6.27747	Ccrd_007281;Ccrd_025298
GO:0048188	cellular_component	Set1C/COMPASS complex	1086	1	20452	2	0.00281715	0.0131797	9.41621	Ccrd_005795
GO:0008168	molecular_function	methyltransferase activity	1086	26	20452	278	0.00187473	0.0131797	1.7613	Ccrd_023910;Ccrd_005225;Ccrd_015406;Ccrd_009171;Ccrd_010278;Ccrd_018230;Ccrd_000290;Ccrd_005101;Ccrd_005158;Ccrd_005163;Ccrd_021723;Ccrd_005610;Ccrd_016578;Ccrd_004659;Ccrd_011205;Ccrd_009048;Ccrd_017388;Ccrd_017640;Ccrd_019031;Ccrd_005622;Ccrd_009739;Ccrd_025968;Ccrd_005528;Ccrd_019657;Ccrd_005713;Ccrd_012615
GO:0019953	biological_process	sexual reproduction	1086	2	20452	8	0.00683618	0.0256427	4.7081	Ccrd_017125;Ccrd_017665
GO:0005677	cellular_component	chromatin silencing complex	1086	1	20452	2	0.00281715	0.0131797	9.41621	Ccrd_019961
GO:0009515	cellular_component	granal stacked thylakoid	1086	1	20452	2	0.00281715	0.0131797	9.41621	Ccrd_026396
GO:0070971	cellular_component	endoplasmic reticulum exit site	1086	1	20452	2	0.00281715	0.0131797	9.41621	Ccrd_017585
GO:0005751	cellular_component	mitochondrial respiratory chain complex IV	1086	1	20452	2	0.00281715	0.0131797	9.41621	Ccrd_005547
GO:0009534	cellular_component	chloroplast thylakoid	1086	6	20452	37	0.00296186	0.0137875	3.0539	Ccrd_010138;Ccrd_006909;Ccrd_018261;Ccrd_025412;Ccrd_005252;Ccrd_026396
GO:0009654	cellular_component	photosystem II oxygen evolving complex	1086	4	20452	20	0.00332197	0.0153868	3.76648	Ccrd_018261;Ccrd_022542;Ccrd_005387;Ccrd_002113
GO:0005789	cellular_component	endoplasmic reticulum membrane	1086	20	20452	208	0.00362596	0.0167117	1.81081	Ccrd_008420;Ccrd_009291;Ccrd_009266;Ccrd_009197;Ccrd_017132;Ccrd_012482;Ccrd_005074;Ccrd_019690;Ccrd_024965;Ccrd_021864;Ccrd_005398;Ccrd_009447;Ccrd_005830;Ccrd_017585;Ccrd_017591;Ccrd_022775;Ccrd_023668;Ccrd_005872;Ccrd_016995;Ccrd_017903
GO:0016104	biological_process	triterpenoid biosynthetic process	1086	2	20452	8	0.00683618	0.0256427	4.7081	Ccrd_025866;Ccrd_005710
GO:0045736	biological_process	negative regulation of cyclin-dependent protein serine/threonine kinase activity	1086	2	20452	8	0.00683618	0.0256427	4.7081	Ccrd_012564;Ccrd_010818
GO:0009536	cellular_component	plastid	1086	20	20452	210	0.00405448	0.0183239	1.79356	Ccrd_011240;Ccrd_009333;Ccrd_017043;Ccrd_002017;Ccrd_018233;Ccrd_022051;Ccrd_005119;Ccrd_022910;Ccrd_007281;Ccrd_011107;Ccrd_022542;Ccrd_022551;Ccrd_012865;Ccrd_025298;Ccrd_016908;Ccrd_016911;Ccrd_010654;Ccrd_002194;Ccrd_004442;Ccrd_009526
GO:0070469	cellular_component	respiratory chain	1086	6	20452	39	0.00403552	0.0183239	2.89729	Ccrd_017543;Ccrd_010237;Ccrd_019916;Ccrd_009599;Ccrd_010119;Ccrd_005511
GO:0090114	biological_process	COPII-coated vesicle budding	1086	1	20452	4	0.015732	0.0412576	4.7081	Ccrd_024965
GO:0004664	molecular_function	prephenate dehydratase activity	1086	2	20452	7	0.00444732	0.0197164	5.38069	Ccrd_007281;Ccrd_025298
GO:0010196	biological_process	nonphotochemical quenching	1086	1	20452	4	0.015732	0.0412576	4.7081	Ccrd_026396
GO:0046423	molecular_function	allene-oxide cyclase activity	1086	2	20452	7	0.00444732	0.0197164	5.38069	Ccrd_018896;Ccrd_018895
GO:0008061	molecular_function	chitin binding	1086	3	20452	14	0.00515565	0.0227484	4.03552	Ccrd_005812;Ccrd_006705;Ccrd_026859
GO:0003713	molecular_function	transcription coactivator activity	1086	2	20452	8	0.00683618	0.0256427	4.7081	Ccrd_017072;Ccrd_016531
GO:0047150	molecular_function	betaine-homocysteine S-methyltransferase activity	1086	1	20452	3	0.00815278	0.0256427	6.27747	Ccrd_000290
GO:0000832	molecular_function	inositol hexakisphosphate 5-kinase activity	1086	1	20452	3	0.00815278	0.0256427	6.27747	Ccrd_005222
GO:0000250	molecular_function	lanosterol synthase activity	1086	2	20452	8	0.00683618	0.0256427	4.7081	Ccrd_025866;Ccrd_005710
GO:0008441	molecular_function	3(2),5-bisphosphate nucleotidase activity	1086	1	20452	3	0.00815278	0.0256427	6.27747	Ccrd_005802
GO:0008483	molecular_function	transaminase activity	1086	9	20452	77	0.00739456	0.0256427	2.20119	Ccrd_005739;Ccrd_009934;Ccrd_002553;Ccrd_014415;Ccrd_010268;Ccrd_010654;Ccrd_017402;Ccrd_017396;Ccrd_014117
GO:0004758	molecular_function	serine C-palmitoyltransferase activity	1086	1	20452	3	0.00815278	0.0256427	6.27747	Ccrd_023668
GO:0008175	molecular_function	tRNA methyltransferase activity	1086	1	20452	3	0.00815278	0.0256427	6.27747	Ccrd_010278
GO:0003871	molecular_function	5-methyltetrahydropteroyltriglutamate-homocysteine S-methyltransferase activity	1086	1	20452	3	0.00815278	0.0256427	6.27747	Ccrd_021723
GO:0004831	molecular_function	tyrosine-tRNA ligase activity	1086	1	20452	3	0.00815278	0.0256427	6.27747	Ccrd_025629
GO:0003955	molecular_function	NAD(P)H dehydrogenase (quinone) activity	1086	2	20452	8	0.00683618	0.0256427	4.7081	Ccrd_009681;Ccrd_019466
GO:0000418	cellular_component	DNA-directed RNA polymerase IV complex	1086	1	20452	3	0.00815278	0.0256427	6.27747	Ccrd_010005
GO:0004601	molecular_function	peroxidase activity	1086	13	20452	125	0.00658462	0.0256427	1.95857	Ccrd_019044;Ccrd_013936;Ccrd_023689;Ccrd_001889;Ccrd_014998;Ccrd_003529;Ccrd_017609;Ccrd_009134;Ccrd_009572;Ccrd_016862;Ccrd_023233;Ccrd_003014;Ccrd_004165
GO:0004602	molecular_function	glutathione peroxidase activity	1086	2	20452	8	0.00683618	0.0256427	4.7081	Ccrd_003529;Ccrd_009134
GO:0019853	biological_process	L-ascorbic acid biosynthetic process	1086	1	20452	4	0.015732	0.0412576	4.7081	Ccrd_018233
GO:0015629	cellular_component	actin cytoskeleton	1086	4	20452	23	0.00631737	0.0256427	3.2752	Ccrd_014708;Ccrd_016730;Ccrd_009602;Ccrd_017606
GO:0004764	molecular_function	shikimate 3-dehydrogenase (NADP+) activity	1086	1	20452	3	0.00815278	0.0256427	6.27747	Ccrd_005749
GO:0019008	cellular_component	molybdopterin synthase complex	1086	1	20452	3	0.00815278	0.0256427	6.27747	Ccrd_017371
GO:0046556	molecular_function	alpha-L-arabinofuranosidase activity	1086	1	20452	3	0.00815278	0.0256427	6.27747	Ccrd_010299
GO:0003849	molecular_function	3-deoxy-7-phosphoheptulonate synthase activity	1086	2	20452	8	0.00683618	0.0256427	4.7081	Ccrd_002017;Ccrd_022051
GO:0052723	molecular_function	inositol hexakisphosphate 1-kinase activity	1086	1	20452	3	0.00815278	0.0256427	6.27747	Ccrd_005222
GO:0052724	molecular_function	inositol hexakisphosphate 3-kinase activity	1086	1	20452	3	0.00815278	0.0256427	6.27747	Ccrd_005222
GO:0060548	biological_process	negative regulation of cell death	1086	1	20452	4	0.015732	0.0412576	4.7081	Ccrd_005747
GO:0006349	biological_process	regulation of gene expression by genetic imprinting	1086	1	20452	4	0.015732	0.0412576	4.7081	Ccrd_019961
GO:0033857	molecular_function	diphosphoinositol-pentakisphosphate kinase activity	1086	1	20452	3	0.00815278	0.0256427	6.27747	Ccrd_005222
GO:0010206	biological_process	photosystem II repair	1086	1	20452	4	0.015732	0.0412576	4.7081	Ccrd_005252
GO:0004614	molecular_function	phosphoglucomutase activity	1086	1	20452	3	0.00815278	0.0256427	6.27747	Ccrd_016224
GO:0005739	cellular_component	mitochondrion	1086	28	20452	332	0.00604767	0.0256427	1.58828	Ccrd_005225;Ccrd_009329;Ccrd_009333;Ccrd_017556;Ccrd_017543;Ccrd_005788;Ccrd_022343;Ccrd_018233;Ccrd_022042;Ccrd_005109;Ccrd_005096;Ccrd_005119;Ccrd_010237;Ccrd_019916;Ccrd_009396;Ccrd_005547;Ccrd_009599;Ccrd_016773;Ccrd_010119;Ccrd_021666;Ccrd_018418;Ccrd_025629;Ccrd_009464;Ccrd_009739;Ccrd_005511;Ccrd_002194;Ccrd_007115;Ccrd_021646
GO:0009306	biological_process	protein secretion	1086	1	20452	4	0.015732	0.0412576	4.7081	Ccrd_005889
GO:0019674	biological_process	NAD metabolic process	1086	1	20452	4	0.015732	0.0412576	4.7081	Ccrd_021272
GO:0008113	molecular_function	peptide-methionine (S)-S-oxide reductase activity	1086	1	20452	3	0.00815278	0.0256427	6.27747	Ccrd_015400
GO:0003855	molecular_function	3-dehydroquinate dehydratase activity	1086	1	20452	3	0.00815278	0.0256427	6.27747	Ccrd_005749
GO:0033743	molecular_function	peptide-methionine (R)-S-oxide reductase activity	1086	1	20452	3	0.00815278	0.0256427	6.27747	Ccrd_009566
GO:0005623	cellular_component	cell	1086	21	20452	234	0.00686187	0.0256427	1.69009	Ccrd_019179;Ccrd_009327;Ccrd_016462;Ccrd_015123;Ccrd_005973;Ccrd_019691;Ccrd_010363;Ccrd_009358;Ccrd_024717;Ccrd_009756;Ccrd_017382;Ccrd_009481;Ccrd_018830;Ccrd_022775;Ccrd_008494;Ccrd_007102;Ccrd_005278;Ccrd_014084;Ccrd_018239;Ccrd_016842;Ccrd_010194
GO:0005665	cellular_component	DNA-directed RNA polymerase II, core complex	1086	2	20452	8	0.00683618	0.0256427	4.7081	Ccrd_005735;Ccrd_010005
GO:0033862	molecular_function	UMP kinase activity	1086	1	20452	3	0.00815278	0.0256427	6.27747	Ccrd_005750
GO:0004623	molecular_function	phospholipase A2 activity	1086	1	20452	3	0.00815278	0.0256427	6.27747	Ccrd_009336
GO:0004354	molecular_function	glutamate dehydrogenase (NADP+) activity	1086	1	20452	3	0.00815278	0.0256427	6.27747	Ccrd_017173
GO:0019441	biological_process	tryptophan catabolic process to kynurenine	1086	1	20452	4	0.015732	0.0412576	4.7081	Ccrd_011707
GO:0000827	molecular_function	inositol-1,3,4,5,6-pentakisphosphate kinase activity	1086	1	20452	3	0.00815278	0.0256427	6.27747	Ccrd_005222
GO:0000829	molecular_function	inositol heptakisphosphate kinase activity	1086	1	20452	3	0.00815278	0.0256427	6.27747	Ccrd_005222
GO:0071806	biological_process	protein transmembrane transport	1086	1	20452	4	0.015732	0.0412576	4.7081	Ccrd_022775
GO:0008121	molecular_function	ubiquinol-cytochrome-c reductase activity	1086	2	20452	8	0.00683618	0.0256427	4.7081	Ccrd_019916;Ccrd_010119
GO:0004478	molecular_function	methionine adenosyltransferase activity	1086	1	20452	3	0.00815278	0.0256427	6.27747	Ccrd_012038
GO:0030904	cellular_component	retromer complex	1086	1	20452	3	0.00815278	0.0256427	6.27747	Ccrd_005242
GO:0030433	biological_process	ER-associated ubiquitin-dependent protein catabolic process	1086	1	20452	4	0.015732	0.0412576	4.7081	Ccrd_018356
GO:0017025	molecular_function	TBP-class protein binding	1086	1	20452	3	0.00815278	0.0256427	6.27747	Ccrd_021651
GO:0004860	molecular_function	protein kinase inhibitor activity	1086	2	20452	8	0.00683618	0.0256427	4.7081	Ccrd_012564;Ccrd_010818
GO:0004861	molecular_function	cyclin-dependent protein serine/threonine kinase inhibitor activity	1086	2	20452	8	0.00683618	0.0256427	4.7081	Ccrd_012564;Ccrd_010818
GO:0034715	cellular_component	pICln-Sm protein complex	1086	1	20452	3	0.00815278	0.0256427	6.27747	Ccrd_025430
GO:0010214	biological_process	seed coat development	1086	1	20452	4	0.015732	0.0412576	4.7081	Ccrd_019961
GO:0042651	cellular_component	thylakoid membrane	1086	2	20452	8	0.00683618	0.0256427	4.7081	Ccrd_022542;Ccrd_020931
GO:0042300	molecular_function	beta-amyrin synthase activity	1086	2	20452	8	0.00683618	0.0256427	4.7081	Ccrd_025866;Ccrd_005710
GO:0000179	molecular_function	rRNA (adenine-N6,N6-)-dimethyltransferase activity	1086	1	20452	3	0.00815278	0.0256427	6.27747	Ccrd_005622
GO:0019521	biological_process	D-gluconate metabolic process	1086	1	20452	4	0.015732	0.0412576	4.7081	Ccrd_012641
GO:0019877	biological_process	diaminopimelate biosynthetic process	1086	1	20452	4	0.015732	0.0412576	4.7081	Ccrd_008430
GO:0016207	molecular_function	4-coumarate-CoA ligase activity	1086	6	20452	45	0.00904181	0.0282481	2.51099	Ccrd_018690;Ccrd_018671;Ccrd_015556;Ccrd_018719;Ccrd_007113;Ccrd_022733
GO:0009535	cellular_component	chloroplast thylakoid membrane	1086	13	20452	130	0.00921926	0.0287061	1.88324	Ccrd_014265;Ccrd_013780;Ccrd_022910;Ccrd_018261;Ccrd_025038;Ccrd_011107;Ccrd_022542;Ccrd_022551;Ccrd_012865;Ccrd_025412;Ccrd_025623;Ccrd_026396;Ccrd_002113
GO:0006741	biological_process	NADP biosynthetic process	1086	1	20452	4	0.015732	0.0412576	4.7081	Ccrd_021272
GO:0009538	cellular_component	photosystem I reaction center	1086	2	20452	9	0.00985261	0.0301736	4.18498	Ccrd_013780;Ccrd_000561
GO:0006120	biological_process	mitochondrial electron transport, NADH to ubiquinone	1086	1	20452	4	0.015732	0.0412576	4.7081	Ccrd_017543
GO:0018022	biological_process	peptidyl-lysine methylation	1086	1	20452	4	0.015732	0.0412576	4.7081	Ccrd_005528
GO:0048229	biological_process	gametophyte development	1086	1	20452	4	0.015732	0.0412576	4.7081	Ccrd_007102
GO:0009507	cellular_component	chloroplast	1086	44	20452	593	0.0103889	0.0317118	1.39735	Ccrd_019237;Ccrd_014265;Ccrd_011240;Ccrd_009333;Ccrd_010138;Ccrd_017043;Ccrd_002017;Ccrd_006909;Ccrd_005929;Ccrd_022051;Ccrd_017340;Ccrd_005101;Ccrd_005095;Ccrd_005097;Ccrd_005119;Ccrd_022910;Ccrd_007281;Ccrd_024854;Ccrd_018261;Ccrd_025038;Ccrd_011107;Ccrd_022542;Ccrd_022551;Ccrd_012865;Ccrd_009103;Ccrd_025298;Ccrd_025623;Ccrd_025629;Ccrd_016908;Ccrd_016911;Ccrd_025819;Ccrd_005492;Ccrd_002194;Ccr…
GO:0009862	biological_process	systemic acquired resistance, salicylic acid mediated signaling pathway	1086	1	20452	4	0.015732	0.0412576	4.7081	Ccrd_010654
GO:0009247	biological_process	glycolipid biosynthetic process	1086	1	20452	4	0.015732	0.0412576	4.7081	Ccrd_009894
GO:0005829	cellular_component	cytosol	1086	21	20452	248	0.013046	0.0394345	1.59468	Ccrd_014380;Ccrd_005222;Ccrd_011240;Ccrd_017371;Ccrd_024365;Ccrd_024505;Ccrd_009343;Ccrd_005815;Ccrd_016862;Ccrd_025430;Ccrd_017140;Ccrd_012641;Ccrd_005793;Ccrd_017170;Ccrd_005826;Ccrd_017585;Ccrd_007102;Ccrd_007097;Ccrd_005242;Ccrd_014084;Ccrd_018063
GO:0006013	biological_process	mannose metabolic process	1086	1	20452	4	0.015732	0.0412576	4.7081	Ccrd_005073
GO:0008308	molecular_function	voltage-gated anion channel activity	1086	3	20452	18	0.0133077	0.0398486	3.13874	Ccrd_005229;Ccrd_005179;Ccrd_019691
GO:0006790	biological_process	sulfur compound metabolic process	1086	1	20452	4	0.015732	0.0412576	4.7081	Ccrd_005802
GO:0009073	biological_process	aromatic amino acid family biosynthetic process	1086	9	20452	37	1.59931e-05	0.000177257	4.58086	Ccrd_002017;Ccrd_012528;Ccrd_008822;Ccrd_022051;Ccrd_005155;Ccrd_007281;Ccrd_025298;Ccrd_025819;Ccrd_005241
GO:0000015	cellular_component	phosphopyruvate hydratase complex	1086	2	20452	10	0.0135254	0.0398486	3.76648	Ccrd_024854;Ccrd_013501
GO:0006032	biological_process	chitin catabolic process	1086	3	20452	13	0.00384252	0.0175362	4.34594	Ccrd_005812;Ccrd_006705;Ccrd_026859
GO:1903508	biological_process	positive regulation of nucleic acid-templated transcription	1086	2	20452	9	0.00985261	0.0301736	4.18498	Ccrd_017072;Ccrd_016531
GO:0004634	molecular_function	phosphopyruvate hydratase activity	1086	2	20452	10	0.0135254	0.0398486	3.76648	Ccrd_024854;Ccrd_013501
GO:0042793	biological_process	transcription from plastid promoter	1086	2	20452	9	0.00985261	0.0301736	4.18498	Ccrd_005097;Ccrd_018327
GO:0071586	biological_process	CAAX-box protein processing	1086	2	20452	9	0.00985261	0.0301736	4.18498	Ccrd_021864;Ccrd_017011
GO:0005688	cellular_component	U6 snRNP	1086	1	20452	4	0.015732	0.0412576	4.7081	Ccrd_005844
GO:0009094	biological_process	L-phenylalanine biosynthetic process	1086	2	20452	9	0.00985261	0.0301736	4.18498	Ccrd_007281;Ccrd_025298
GO:0016891	molecular_function	endoribonuclease activity, producing 5-phosphomonoesters	1086	1	20452	4	0.015732	0.0412576	4.7081	Ccrd_009704
GO:0016857	molecular_function	racemase and epimerase activity, acting on carbohydrates and derivatives	1086	1	20452	4	0.015732	0.0412576	4.7081	Ccrd_005090
GO:0016279	molecular_function	protein-lysine N-methyltransferase activity	1086	1	20452	4	0.015732	0.0412576	4.7081	Ccrd_005528
GO:0046940	biological_process	nucleoside monophosphate phosphorylation	1086	3	20452	15	0.00673842	0.0256427	3.76648	Ccrd_005750;Ccrd_015930;Ccrd_005092
GO:0009570	cellular_component	chloroplast stroma	1086	13	20452	137	0.0142264	0.0412576	1.78702	Ccrd_011240;Ccrd_005740;Ccrd_017043;Ccrd_005929;Ccrd_005101;Ccrd_007281;Ccrd_024854;Ccrd_018261;Ccrd_025298;Ccrd_025629;Ccrd_012641;Ccrd_025819;Ccrd_002194
GO:0009579	cellular_component	thylakoid	1086	12	20452	125	0.0155228	0.0412576	1.80791	Ccrd_019214;Ccrd_014265;Ccrd_017340;Ccrd_005119;Ccrd_022910;Ccrd_018261;Ccrd_025038;Ccrd_011107;Ccrd_012865;Ccrd_005889;Ccrd_005252;Ccrd_026396
GO:0006694	biological_process	steroid biosynthetic process	1086	3	20452	15	0.00673842	0.0256427	3.76648	Ccrd_013435;Ccrd_017640;Ccrd_005793
GO:0010584	biological_process	pollen exine formation	1086	2	20452	10	0.0135254	0.0398486	3.76648	Ccrd_001862;Ccrd_017585
GO:0004616	molecular_function	phosphogluconate dehydrogenase (decarboxylating) activity	1086	1	20452	4	0.015732	0.0412576	4.7081	Ccrd_012641
GO:0031314	cellular_component	extrinsic component of mitochondrial inner membrane	1086	1	20452	4	0.015732	0.0412576	4.7081	Ccrd_018418
GO:0031359	cellular_component	integral component of chloroplast outer membrane	1086	1	20452	4	0.015732	0.0412576	4.7081	Ccrd_016911
GO:0009695	biological_process	jasmonic acid biosynthetic process	1086	2	20452	10	0.0135254	0.0398486	3.76648	Ccrd_018896;Ccrd_018895
GO:0009826	biological_process	unidimensional cell growth	1086	2	20452	10	0.0135254	0.0398486	3.76648	Ccrd_023996;Ccrd_017754
GO:0007050	biological_process	cell cycle arrest	1086	2	20452	10	0.0135254	0.0398486	3.76648	Ccrd_012564;Ccrd_010818
GO:0009228	biological_process	thiamine biosynthetic process	1086	2	20452	11	0.0178732	0.0459667	3.42408	Ccrd_011240;Ccrd_018562
GO:0042908	biological_process	xenobiotic transport	1086	7	20452	39	0.00086905	0.00735533	3.38018	Ccrd_024175;Ccrd_021178;Ccrd_017297;Ccrd_023377;Ccrd_018732;Ccrd_010052;Ccrd_001058
GO:0030124	cellular_component	AP-4 adaptor complex	1086	1	20452	4	0.015732	0.0412576	4.7081	Ccrd_009327
GO:0009543	cellular_component	chloroplast thylakoid lumen	1086	1	20452	4	0.015732	0.0412576	4.7081	Ccrd_005252
GO:0015995	biological_process	chlorophyll biosynthetic process	1086	3	20452	18	0.0133077	0.0398486	3.13874	Ccrd_010138;Ccrd_017339;Ccrd_017240
GO:0009698	biological_process	phenylpropanoid metabolic process	1086	8	20452	49	0.000976421	0.00818962	3.07468	Ccrd_018690;Ccrd_018671;Ccrd_015556;Ccrd_018719;Ccrd_007512;Ccrd_014855;Ccrd_007113;Ccrd_022733
GO:0006888	biological_process	ER to Golgi vesicle-mediated transport	1086	8	20452	51	0.00131493	0.0105534	2.9541	Ccrd_009291;Ccrd_009170;Ccrd_009197;Ccrd_019690;Ccrd_024965;Ccrd_017635;Ccrd_017585;Ccrd_017001
GO:0006662	biological_process	glycerol ether metabolic process	1086	4	20452	27	0.0127204	0.0385757	2.78999	Ccrd_019179;Ccrd_015123;Ccrd_005973;Ccrd_018830
GO:0006099	biological_process	tricarboxylic acid cycle	1086	5	20452	36	0.0109647	0.0333599	2.61561	Ccrd_005119;Ccrd_009227;Ccrd_016344;Ccrd_016629;Ccrd_005628
GO:0036402	molecular_function	proteasome-activating ATPase activity	1086	1	20452	4	0.015732	0.0412576	4.7081	Ccrd_009789
GO:0015450	molecular_function	P-P-bond-hydrolysis-driven protein transmembrane transporter activity	1086	1	20452	4	0.015732	0.0412576	4.7081	Ccrd_022775
GO:0006869	biological_process	lipid transport	1086	8	20452	64	0.00644157	0.0256427	2.35405	Ccrd_006757;Ccrd_018445;Ccrd_003023;Ccrd_003002;Ccrd_018922;Ccrd_018476;Ccrd_017221;Ccrd_017236
GO:0004866	molecular_function	endopeptidase inhibitor activity	1086	1	20452	4	0.015732	0.0412576	4.7081	Ccrd_021656
GO:0004559	molecular_function	alpha-mannosidase activity	1086	1	20452	4	0.015732	0.0412576	4.7081	Ccrd_005073
GO:0006979	biological_process	response to oxidative stress	1086	15	20452	130	0.00145994	0.0112331	2.17297	Ccrd_019237;Ccrd_019044;Ccrd_013936;Ccrd_001889;Ccrd_014998;Ccrd_003529;Ccrd_017609;Ccrd_009134;Ccrd_009572;Ccrd_009566;Ccrd_016862;Ccrd_023233;Ccrd_025623;Ccrd_003014;Ccrd_004165
GO:0006096	biological_process	glycolytic process	1086	9	20452	79	0.00883368	0.0276908	2.14546	Ccrd_005730;Ccrd_009933;Ccrd_009021;Ccrd_024854;Ccrd_023211;Ccrd_017589;Ccrd_013988;Ccrd_013501;Ccrd_017010
GO:0009512	cellular_component	cytochrome b6f complex	1086	1	20452	4	0.015732	0.0412576	4.7081	Ccrd_020142
GO:0008652	biological_process	cellular amino acid biosynthetic process	1086	11	20452	99	0.0061688	0.0256427	2.09249	Ccrd_008430;Ccrd_002017;Ccrd_008822;Ccrd_022051;Ccrd_005155;Ccrd_021723;Ccrd_007281;Ccrd_025298;Ccrd_009565;Ccrd_005241;Ccrd_001687
GO:0098869	biological_process	cellular oxidant detoxification	1086	14	20452	139	0.00706099	0.0256427	1.89679	Ccrd_019044;Ccrd_013936;Ccrd_023689;Ccrd_001889;Ccrd_014998;Ccrd_003529;Ccrd_017609;Ccrd_009134;Ccrd_009572;Ccrd_016862;Ccrd_023233;Ccrd_017135;Ccrd_003014;Ccrd_004165
GO:0004096	molecular_function	catalase activity	1086	1	20452	4	0.015732	0.0412576	4.7081	Ccrd_013936
GO:0032259	biological_process	methylation	1086	26	20452	268	0.0010976	0.0091238	1.82703	Ccrd_023910;Ccrd_005225;Ccrd_015406;Ccrd_009171;Ccrd_010278;Ccrd_018230;Ccrd_000290;Ccrd_005101;Ccrd_005158;Ccrd_005163;Ccrd_021723;Ccrd_005610;Ccrd_016578;Ccrd_004659;Ccrd_011205;Ccrd_009048;Ccrd_017388;Ccrd_017640;Ccrd_019031;Ccrd_005622;Ccrd_009739;Ccrd_025968;Ccrd_005528;Ccrd_019657;Ccrd_005713;Ccrd_012615
GO:0022900	biological_process	electron transport chain	1086	13	20452	140	0.0169238	0.0442586	1.74872	Ccrd_014265;Ccrd_005103;Ccrd_005119;Ccrd_005547;Ccrd_020408;Ccrd_009756;Ccrd_017382;Ccrd_010119;Ccrd_005511;Ccrd_005628;Ccrd_008494;Ccrd_004442;Ccrd_018239
GO:0019706	molecular_function	protein-cysteine S-palmitoyltransferase activity	1086	4	20452	29	0.0171497	0.0445987	2.59757	Ccrd_005792;Ccrd_005706;Ccrd_006787;Ccrd_009899
GO:0016409	molecular_function	palmitoyltransferase activity	1086	4	20452	29	0.0171497	0.0445987	2.59757	Ccrd_005792;Ccrd_005706;Ccrd_006787;Ccrd_009899
GO:0055114	biological_process	oxidation-reduction process	1086	110	20452	1629	0.00368964	0.0169214	1.27168	Ccrd_019272;Ccrd_014265;Ccrd_011032;Ccrd_015418;Ccrd_015400;Ccrd_009536;Ccrd_009516;Ccrd_009515;Ccrd_005749;Ccrd_016961;Ccrd_017543;Ccrd_011445;Ccrd_014668;Ccrd_004678;Ccrd_019044;Ccrd_020856;Ccrd_013936;Ccrd_012482;Ccrd_018234;Ccrd_018233;Ccrd_000325;Ccrd_015574;Ccrd_023689;Ccrd_015123;Ccrd_017340;Ccrd_001869;Ccrd_005095;Ccrd_005119;Ccrd_013435;Ccrd_023611;Ccrd_010237;Ccrd_022895;Ccrd_019916;Ccr…
GO:0019205	molecular_function	nucleobase-containing compound kinase activity	1086	2	20452	11	0.0178732	0.0459667	3.42408	Ccrd_015930;Ccrd_005092
GO:0031977	cellular_component	thylakoid lumen	1086	2	20452	11	0.0178732	0.0459667	3.42408	Ccrd_018261;Ccrd_005252
GO:0004364	molecular_function	glutathione transferase activity	1086	2	20452	11	0.0178732	0.0459667	3.42408	Ccrd_020091;Ccrd_017720
GO:0009523	cellular_component	photosystem II	1086	8	20452	76	0.0190056	0.0487445	1.98236	Ccrd_022910;Ccrd_018261;Ccrd_011107;Ccrd_022542;Ccrd_012865;Ccrd_005387;Ccrd_003937;Ccrd_002113
GO:0005516	molecular_function	calmodulin binding	1086	7	20452	64	0.0195296	0.0499507	2.0598	Ccrd_010576;Ccrd_010315;Ccrd_022871;Ccrd_022870;Ccrd_009806;Ccrd_005505;Ccrd_025835
GO:0008171	molecular_function	O-methyltransferase activity	1086	4	20452	30	0.0197039	0.0499846	2.51099	Ccrd_023910;Ccrd_004659;Ccrd_019031;Ccrd_012615
GO:0005840	cellular_component	ribosome	1086	37	20452	505	0.0196613	0.0499846	1.3798	Ccrd_009314;Ccrd_009323;Ccrd_005738;Ccrd_005742;Ccrd_005734;Ccrd_022042;Ccrd_005100;Ccrd_017160;Ccrd_005840;Ccrd_009355;Ccrd_014014;Ccrd_010610;Ccrd_009223;Ccrd_009598;Ccrd_010484;Ccrd_009072;Ccrd_009086;Ccrd_009150;Ccrd_009077;Ccrd_009497;Ccrd_025309;Ccrd_005893;Ccrd_009834;Ccrd_017830;Ccrd_011532;Ccrd_009159;Ccrd_016909;Ccrd_009488;Ccrd_005511;Ccrd_025943;Ccrd_026127;Ccrd_015751;Ccrd_005249;Ccr…
GO:0005654	cellular_component	nucleoplasm	1086	4	20452	30	0.0197039	0.0499846	2.51099	Ccrd_005366;Ccrd_012564;Ccrd_010818;Ccrd_005306

## Sheet: GOEA_UP_core-DEGs
GO_ID	GO_Category	GO_Description	Query_Total	Query_Item	BG_Total	BG_Item	p_value	FDR	E_Score	Genes
GO:0005775	cellular_component	vacuolar lumen	909	1	20452	1	0	0	22.4994	Ccrd_002426
GO:0009921	cellular_component	auxin efflux carrier complex	909	1	20452	1	0	0	22.4994	Ccrd_009752
GO:0005663	cellular_component	DNA replication factor C complex	909	1	20452	1	0	0	22.4994	Ccrd_000477
GO:0008622	cellular_component	epsilon DNA polymerase complex	909	1	20452	1	0	0	22.4994	Ccrd_013806
GO:0030139	cellular_component	endocytic vesicle	909	1	20452	1	0	0	22.4994	Ccrd_015990
GO:0000796	cellular_component	condensin complex	909	3	20452	3	0	0	22.4994	Ccrd_019682;Ccrd_013012;Ccrd_010917
GO:0008017	molecular_function	microtubule binding	909	25	20452	117	7.53198e-12	6.00989e-11	4.80757	Ccrd_022636;Ccrd_011453;Ccrd_024120;Ccrd_022075;Ccrd_022571;Ccrd_019700;Ccrd_017348;Ccrd_012839;Ccrd_014448;Ccrd_006971;Ccrd_015680;Ccrd_021381;Ccrd_022607;Ccrd_004047;Ccrd_012990;Ccrd_012925;Ccrd_019439;Ccrd_013835;Ccrd_004967;Ccrd_022117;Ccrd_007036;Ccrd_021751;Ccrd_003396;Ccrd_004761;Ccrd_022517
GO:0003777	molecular_function	microtubule motor activity	909	20	20452	86	1.18358e-10	9.25128e-10	5.23243	Ccrd_011453;Ccrd_024120;Ccrd_022075;Ccrd_022571;Ccrd_019700;Ccrd_012839;Ccrd_006971;Ccrd_015680;Ccrd_021381;Ccrd_004047;Ccrd_012990;Ccrd_012925;Ccrd_013835;Ccrd_004967;Ccrd_022117;Ccrd_007036;Ccrd_021751;Ccrd_003396;Ccrd_004761;Ccrd_022517
GO:0007018	biological_process	microtubule-based movement	909	20	20452	86	1.18358e-10	9.25128e-10	5.23243	Ccrd_011453;Ccrd_024120;Ccrd_022075;Ccrd_022571;Ccrd_019700;Ccrd_012839;Ccrd_006971;Ccrd_015680;Ccrd_021381;Ccrd_004047;Ccrd_012990;Ccrd_012925;Ccrd_013835;Ccrd_004967;Ccrd_022117;Ccrd_007036;Ccrd_021751;Ccrd_003396;Ccrd_004761;Ccrd_022517
GO:0005874	cellular_component	microtubule	909	20	20452	111	1.6655e-08	1.28866e-07	4.05395	Ccrd_022636;Ccrd_024120;Ccrd_012545;Ccrd_021489;Ccrd_019700;Ccrd_007902;Ccrd_007908;Ccrd_007717;Ccrd_017348;Ccrd_014448;Ccrd_015680;Ccrd_022607;Ccrd_004047;Ccrd_012990;Ccrd_019439;Ccrd_004967;Ccrd_022117;Ccrd_003396;Ccrd_004761;Ccrd_012164
GO:0003774	molecular_function	motor activity	909	17	20452	90	7.14757e-08	5.47504e-07	4.2499	Ccrd_011453;Ccrd_024120;Ccrd_022571;Ccrd_019700;Ccrd_012839;Ccrd_006971;Ccrd_015680;Ccrd_021381;Ccrd_012990;Ccrd_012925;Ccrd_013835;Ccrd_022117;Ccrd_007036;Ccrd_021751;Ccrd_003396;Ccrd_004761;Ccrd_022517
GO:0042744	biological_process	hydrogen peroxide catabolic process	909	12	20452	65	4.65115e-06	3.5275e-05	4.15374	Ccrd_024377;Ccrd_004478;Ccrd_012678;Ccrd_005687;Ccrd_004297;Ccrd_025116;Ccrd_017982;Ccrd_022196;Ccrd_018836;Ccrd_019305;Ccrd_023159;Ccrd_018409
GO:0006468	biological_process	protein phosphorylation	909	79	20452	1090	6.78826e-06	5.09785e-05	1.63069	Ccrd_015424;Ccrd_011818;Ccrd_011787;Ccrd_011066;Ccrd_008295;Ccrd_002304;Ccrd_024114;Ccrd_001366;Ccrd_011442;Ccrd_016393;Ccrd_006931;Ccrd_016525;Ccrd_014935;Ccrd_000072;Ccrd_000273;Ccrd_015575;Ccrd_016883;Ccrd_012338;Ccrd_006146;Ccrd_000941;Ccrd_013026;Ccrd_006023;Ccrd_020687;Ccrd_006102;Ccrd_006497;Ccrd_021469;Ccrd_016576;Ccrd_007503;Ccrd_008167;Ccrd_024958;Ccrd_000116;Ccrd_000127;Ccrd_000131;Ccr…
GO:0004672	molecular_function	protein kinase activity	909	77	20452	1063	8.96316e-06	6.66581e-05	1.62978	Ccrd_015424;Ccrd_011818;Ccrd_011787;Ccrd_011066;Ccrd_008295;Ccrd_002304;Ccrd_024114;Ccrd_001366;Ccrd_011442;Ccrd_016393;Ccrd_006931;Ccrd_016525;Ccrd_014935;Ccrd_000072;Ccrd_000273;Ccrd_015575;Ccrd_016883;Ccrd_012338;Ccrd_006146;Ccrd_000941;Ccrd_013026;Ccrd_006023;Ccrd_020687;Ccrd_006102;Ccrd_006497;Ccrd_021469;Ccrd_016576;Ccrd_007503;Ccrd_008167;Ccrd_024958;Ccrd_000116;Ccrd_000127;Ccrd_000131;Ccr…
GO:0020037	molecular_function	heme binding	909	39	20452	432	1.02496e-05	7.54921e-05	2.0312	Ccrd_015144;Ccrd_015019;Ccrd_015020;Ccrd_000768;Ccrd_012072;Ccrd_024377;Ccrd_004478;Ccrd_012522;Ccrd_024408;Ccrd_023393;Ccrd_002790;Ccrd_012678;Ccrd_021693;Ccrd_006310;Ccrd_016938;Ccrd_005687;Ccrd_007296;Ccrd_016940;Ccrd_016939;Ccrd_004297;Ccrd_015041;Ccrd_016947;Ccrd_025116;Ccrd_025243;Ccrd_021142;Ccrd_015047;Ccrd_015160;Ccrd_017982;Ccrd_022196;Ccrd_018836;Ccrd_019305;Ccrd_023159;Ccrd_022806;Ccr…
GO:0007076	biological_process	mitotic chromosome condensation	909	3	20452	5	1.87018e-05	0.000136434	13.4997	Ccrd_019682;Ccrd_013012;Ccrd_010917
GO:0030246	molecular_function	carbohydrate binding	909	37	20452	419	2.68761e-05	0.000194218	1.98682	Ccrd_015424;Ccrd_011818;Ccrd_011787;Ccrd_011066;Ccrd_002304;Ccrd_024114;Ccrd_011442;Ccrd_016393;Ccrd_006931;Ccrd_000072;Ccrd_000273;Ccrd_006162;Ccrd_020687;Ccrd_000418;Ccrd_016576;Ccrd_009555;Ccrd_007503;Ccrd_000131;Ccrd_007241;Ccrd_011061;Ccrd_013264;Ccrd_018884;Ccrd_016755;Ccrd_001637;Ccrd_003983;Ccrd_019869;Ccrd_003512;Ccrd_025507;Ccrd_025591;Ccrd_011524;Ccrd_015990;Ccrd_019479;Ccrd_000014;Ccr…
GO:0016758	molecular_function	transferase activity, transferring hexosyl groups	909	15	20452	115	4.91516e-05	0.000351871	2.93471	Ccrd_010675;Ccrd_006619;Ccrd_023547;Ccrd_003000;Ccrd_002944;Ccrd_017644;Ccrd_009477;Ccrd_025714;Ccrd_004635;Ccrd_017282;Ccrd_002908;Ccrd_026384;Ccrd_013270;Ccrd_021816;Ccrd_012749
GO:0071555	biological_process	cell wall organization	909	19	20452	168	5.92516e-05	0.000420247	2.54458	Ccrd_019152;Ccrd_000418;Ccrd_022005;Ccrd_007241;Ccrd_006764;Ccrd_006765;Ccrd_008017;Ccrd_003809;Ccrd_008164;Ccrd_008165;Ccrd_000567;Ccrd_008006;Ccrd_021684;Ccrd_011595;Ccrd_026415;Ccrd_021313;Ccrd_021312;Ccrd_021743;Ccrd_021973
GO:0008194	molecular_function	UDP-glycosyltransferase activity	909	14	20452	106	6.87683e-05	0.000483271	2.97163	Ccrd_010675;Ccrd_006619;Ccrd_023547;Ccrd_003000;Ccrd_002944;Ccrd_017644;Ccrd_009477;Ccrd_025714;Ccrd_004635;Ccrd_002908;Ccrd_026384;Ccrd_013270;Ccrd_021816;Ccrd_012749
GO:0005524	molecular_function	ATP binding	909	135	20452	2237	8.43075e-05	0.000587087	1.35781	Ccrd_015424;Ccrd_011818;Ccrd_011787;Ccrd_011066;Ccrd_008295;Ccrd_002304;Ccrd_011453;Ccrd_013373;Ccrd_024120;Ccrd_024114;Ccrd_001366;Ccrd_011442;Ccrd_023078;Ccrd_016393;Ccrd_006931;Ccrd_022075;Ccrd_016491;Ccrd_016525;Ccrd_014935;Ccrd_012535;Ccrd_003433;Ccrd_000095;Ccrd_000072;Ccrd_000062;Ccrd_000054;Ccrd_000277;Ccrd_000273;Ccrd_015575;Ccrd_022571;Ccrd_016883;Ccrd_008283;Ccrd_019700;Ccrd_012338;Ccr…
GO:0004674	molecular_function	protein serine/threonine kinase activity	909	35	20452	411	8.86926e-05	0.000612059	1.91601	Ccrd_008413;Ccrd_015424;Ccrd_011818;Ccrd_011787;Ccrd_011442;Ccrd_016393;Ccrd_015575;Ccrd_016883;Ccrd_000941;Ccrd_013026;Ccrd_006023;Ccrd_006497;Ccrd_021469;Ccrd_007503;Ccrd_024958;Ccrd_000127;Ccrd_011061;Ccrd_013264;Ccrd_011164;Ccrd_016766;Ccrd_006554;Ccrd_022264;Ccrd_017974;Ccrd_003076;Ccrd_025626;Ccrd_011541;Ccrd_025687;Ccrd_004363;Ccrd_015990;Ccrd_018840;Ccrd_003690;Ccrd_004092;Ccrd_019057;Ccr…
GO:0019901	molecular_function	protein kinase binding	909	4	20452	12	0.000104603	0.000715408	7.49982	Ccrd_021208;Ccrd_011549;Ccrd_025769;Ccrd_026870
GO:0009733	biological_process	response to auxin	909	13	20452	98	0.000107212	0.000726763	2.98462	Ccrd_000488;Ccrd_007567;Ccrd_021301;Ccrd_017570;Ccrd_001916;Ccrd_001915;Ccrd_001914;Ccrd_017578;Ccrd_017581;Ccrd_017576;Ccrd_021302;Ccrd_021304;Ccrd_017573
GO:0005576	cellular_component	extracellular region	909	32	20452	368	0.000110557	0.000742864	1.95647	Ccrd_019152;Ccrd_014374;Ccrd_024377;Ccrd_004478;Ccrd_019561;Ccrd_006162;Ccrd_012678;Ccrd_000418;Ccrd_005687;Ccrd_022005;Ccrd_012688;Ccrd_004297;Ccrd_007241;Ccrd_006764;Ccrd_006765;Ccrd_008017;Ccrd_025116;Ccrd_019566;Ccrd_010898;Ccrd_003809;Ccrd_000552;Ccrd_017982;Ccrd_022196;Ccrd_008006;Ccrd_018836;Ccrd_019305;Ccrd_020937;Ccrd_023159;Ccrd_011595;Ccrd_018409;Ccrd_021313;Ccrd_021312
GO:0051513	biological_process	regulation of monopolar cell growth	909	3	20452	7	0.000121826	0.00081147	9.64262	Ccrd_019121;Ccrd_025724;Ccrd_022487
GO:0016705	molecular_function	oxidoreductase activity, acting on paired donors, with incorporation or reduction of molecular oxygen	909	28	20452	316	0.000190604	0.00125865	1.99362	Ccrd_015144;Ccrd_015019;Ccrd_015020;Ccrd_000768;Ccrd_012072;Ccrd_012522;Ccrd_024408;Ccrd_000264;Ccrd_023393;Ccrd_002790;Ccrd_021693;Ccrd_006310;Ccrd_016938;Ccrd_007296;Ccrd_016940;Ccrd_016939;Ccrd_015041;Ccrd_016947;Ccrd_025243;Ccrd_021142;Ccrd_015047;Ccrd_015160;Ccrd_022806;Ccrd_006055;Ccrd_006054;Ccrd_008913;Ccrd_026851;Ccrd_008661
GO:0004650	molecular_function	polygalacturonase activity	909	8	20452	48	0.000228649	0.00149696	3.74991	Ccrd_008943;Ccrd_016016;Ccrd_022005;Ccrd_008017;Ccrd_007870;Ccrd_008006;Ccrd_021313;Ccrd_021312
GO:0009524	cellular_component	phragmoplast	909	3	20452	8	0.000235065	0.00152593	8.43729	Ccrd_017348;Ccrd_006971;Ccrd_026482
GO:0005506	molecular_function	iron ion binding	909	30	20452	357	0.000310528	0.00199886	1.89071	Ccrd_015144;Ccrd_015019;Ccrd_015020;Ccrd_000768;Ccrd_012072;Ccrd_012522;Ccrd_024408;Ccrd_000264;Ccrd_023393;Ccrd_002790;Ccrd_021693;Ccrd_006310;Ccrd_016938;Ccrd_007296;Ccrd_016940;Ccrd_016939;Ccrd_013057;Ccrd_015041;Ccrd_016947;Ccrd_025243;Ccrd_021142;Ccrd_015047;Ccrd_015160;Ccrd_018919;Ccrd_022806;Ccrd_006055;Ccrd_006054;Ccrd_008913;Ccrd_026851;Ccrd_008661
GO:0016798	molecular_function	hydrolase activity, acting on glycosyl bonds	909	24	20452	264	0.000321102	0.0020497	2.0454	Ccrd_014374;Ccrd_015430;Ccrd_008943;Ccrd_016016;Ccrd_006945;Ccrd_002426;Ccrd_015219;Ccrd_006561;Ccrd_006162;Ccrd_000418;Ccrd_022005;Ccrd_009555;Ccrd_007241;Ccrd_008017;Ccrd_007870;Ccrd_000217;Ccrd_011524;Ccrd_008006;Ccrd_011630;Ccrd_016349;Ccrd_021313;Ccrd_021312;Ccrd_018994;Ccrd_015984
GO:0031668	biological_process	cellular response to extracellular stimulus	909	2	20452	4	0.000338452	0.00209076	11.2497	Ccrd_016687;Ccrd_016686
GO:0010091	biological_process	trichome branching	909	2	20452	4	0.000338452	0.00209076	11.2497	Ccrd_000309;Ccrd_000595
GO:0004124	molecular_function	cysteine synthase activity	909	2	20452	4	0.000338452	0.00209076	11.2497	Ccrd_008931;Ccrd_015127
GO:0004557	molecular_function	alpha-galactosidase activity	909	2	20452	4	0.000338452	0.00209076	11.2497	Ccrd_015430;Ccrd_015984
GO:0005618	cellular_component	cell wall	909	16	20452	149	0.000344514	0.00211118	2.41605	Ccrd_019152;Ccrd_008943;Ccrd_016016;Ccrd_000418;Ccrd_022005;Ccrd_007241;Ccrd_006764;Ccrd_006765;Ccrd_008017;Ccrd_003809;Ccrd_007870;Ccrd_008006;Ccrd_011595;Ccrd_021313;Ccrd_021312;Ccrd_015984
GO:0000166	molecular_function	nucleotide binding	909	97	20452	1572	0.000388777	0.00236352	1.38832	Ccrd_015424;Ccrd_011818;Ccrd_011787;Ccrd_008295;Ccrd_002304;Ccrd_011453;Ccrd_013373;Ccrd_024120;Ccrd_011442;Ccrd_023078;Ccrd_016491;Ccrd_016525;Ccrd_012535;Ccrd_003433;Ccrd_000095;Ccrd_000062;Ccrd_000054;Ccrd_000277;Ccrd_015575;Ccrd_022571;Ccrd_016883;Ccrd_021489;Ccrd_019700;Ccrd_000360;Ccrd_000544;Ccrd_006405;Ccrd_000941;Ccrd_024691;Ccrd_013026;Ccrd_006023;Ccrd_008056;Ccrd_020687;Ccrd_007902;Ccr…
GO:0009408	biological_process	response to heat	909	5	20452	24	0.000512366	0.00309033	4.68739	Ccrd_000174;Ccrd_012535;Ccrd_000360;Ccrd_000488;Ccrd_013512
GO:0009607	biological_process	response to biotic stimulus	909	5	20452	25	0.000649026	0.00388401	4.49989	Ccrd_007203;Ccrd_021540;Ccrd_003764;Ccrd_014749;Ccrd_026362
GO:0042546	biological_process	cell wall biogenesis	909	3	20452	10	0.000656468	0.0038981	6.74983	Ccrd_000418;Ccrd_007241;Ccrd_021743
GO:0046777	biological_process	protein autophosphorylation	909	4	20452	17	0.000678681	0.003999	5.29399	Ccrd_008413;Ccrd_024678;Ccrd_004363;Ccrd_015990
GO:0005634	cellular_component	nucleus	909	150	20452	2656	0.000742464	0.00434143	1.27068	Ccrd_013226;Ccrd_013816;Ccrd_013818;Ccrd_013817;Ccrd_003359;Ccrd_014976;Ccrd_006740;Ccrd_008062;Ccrd_011685;Ccrd_003597;Ccrd_003598;Ccrd_013329;Ccrd_013325;Ccrd_020958;Ccrd_000090;Ccrd_000029;Ccrd_000039;Ccrd_024412;Ccrd_000315;Ccrd_000295;Ccrd_000316;Ccrd_000312;Ccrd_000309;Ccrd_003232;Ccrd_016918;Ccrd_012382;Ccrd_010981;Ccrd_022897;Ccrd_000537;Ccrd_006389;Ccrd_024690;Ccrd_024709;Ccrd_006023;Ccr…
GO:0032147	biological_process	activation of protein kinase activity	909	2	20452	5	0.000818077	0.00457407	8.99978	Ccrd_012545;Ccrd_017348
GO:0048829	biological_process	root cap development	909	2	20452	5	0.000818077	0.00457407	8.99978	Ccrd_022533;Ccrd_015990
GO:0052692	molecular_function	raffinose alpha-galactosidase activity	909	2	20452	5	0.000818077	0.00457407	8.99978	Ccrd_015430;Ccrd_015984
GO:0015833	biological_process	peptide transport	909	2	20452	5	0.000818077	0.00457407	8.99978	Ccrd_001240;Ccrd_026682
GO:0072659	biological_process	protein localization to plasma membrane	909	2	20452	5	0.000818077	0.00457407	8.99978	Ccrd_017615;Ccrd_003173
GO:0051781	biological_process	positive regulation of cell division	909	2	20452	5	0.000818077	0.00457407	8.99978	Ccrd_013806;Ccrd_000826
GO:0009611	biological_process	response to wounding	909	4	20452	18	0.000905546	0.00502644	4.99988	Ccrd_007296;Ccrd_006668;Ccrd_006888;Ccrd_013390
GO:0005504	molecular_function	fatty acid binding	909	3	20452	11	0.0009954	0.00544626	6.13621	Ccrd_011188;Ccrd_004706;Ccrd_003745
GO:0000160	biological_process	phosphorelay signal transduction system	909	7	20452	47	0.000993569	0.00544626	3.35098	Ccrd_008295;Ccrd_016063;Ccrd_022877;Ccrd_016696;Ccrd_022914;Ccrd_025769;Ccrd_021008
GO:0004497	molecular_function	monooxygenase activity	909	20	20452	227	0.00125693	0.00682843	1.98233	Ccrd_015144;Ccrd_015019;Ccrd_015020;Ccrd_000768;Ccrd_012072;Ccrd_024408;Ccrd_023393;Ccrd_002790;Ccrd_006310;Ccrd_016938;Ccrd_017454;Ccrd_016940;Ccrd_016939;Ccrd_015041;Ccrd_016947;Ccrd_025243;Ccrd_015047;Ccrd_015160;Ccrd_008913;Ccrd_008661
GO:0005515	molecular_function	protein binding	909	147	20452	2632	0.0013274	0.00716051	1.25662	Ccrd_019262;Ccrd_008413;Ccrd_023898;Ccrd_015424;Ccrd_004195;Ccrd_011074;Ccrd_008295;Ccrd_002304;Ccrd_011461;Ccrd_004144;Ccrd_015921;Ccrd_011677;Ccrd_011685;Ccrd_003597;Ccrd_003598;Ccrd_006931;Ccrd_015721;Ccrd_020436;Ccrd_000176;Ccrd_012518;Ccrd_000084;Ccrd_000045;Ccrd_000038;Ccrd_000258;Ccrd_000295;Ccrd_002582;Ccrd_006808;Ccrd_006360;Ccrd_006355;Ccrd_019069;Ccrd_007161;Ccrd_012419;Ccrd_006198;Ccr…
GO:0016757	molecular_function	transferase activity, transferring glycosyl groups	909	32	20452	425	0.00141422	0.00757545	1.69408	Ccrd_016066;Ccrd_010675;Ccrd_000052;Ccrd_000274;Ccrd_024509;Ccrd_022404;Ccrd_023547;Ccrd_000528;Ccrd_012152;Ccrd_001610;Ccrd_006024;Ccrd_003000;Ccrd_007307;Ccrd_005058;Ccrd_007242;Ccrd_000159;Ccrd_000567;Ccrd_018918;Ccrd_019423;Ccrd_025714;Ccrd_004635;Ccrd_025867;Ccrd_001917;Ccrd_002965;Ccrd_016798;Ccrd_000238;Ccrd_026384;Ccrd_013270;Ccrd_021743;Ccrd_012749;Ccrd_021973;Ccrd_014432
GO:0043424	molecular_function	protein histidine kinase binding	909	1	20452	2	0.00197333	0.00775164	11.2497	Ccrd_025769
GO:0042162	molecular_function	telomeric DNA binding	909	1	20452	2	0.00197333	0.00775164	11.2497	Ccrd_006647
GO:0010311	biological_process	lateral root formation	909	2	20452	6	0.00158203	0.00775164	7.49982	Ccrd_004709;Ccrd_015990
GO:0004459	molecular_function	L-lactate dehydrogenase activity	909	1	20452	2	0.00197333	0.00775164	11.2497	Ccrd_007832
GO:0060236	biological_process	regulation of mitotic spindle organization	909	2	20452	6	0.00158203	0.00775164	7.49982	Ccrd_012545;Ccrd_017348
GO:0006261	biological_process	DNA-dependent DNA replication	909	2	20452	6	0.00158203	0.00775164	7.49982	Ccrd_008056;Ccrd_013806
GO:0003887	molecular_function	DNA-directed DNA polymerase activity	909	4	20452	21	0.00192503	0.00775164	4.28561	Ccrd_008056;Ccrd_013806;Ccrd_018182;Ccrd_001120
GO:0036310	molecular_function	annealing helicase activity	909	1	20452	2	0.00197333	0.00775164	11.2497	Ccrd_001519
GO:0010329	molecular_function	auxin efflux transmembrane transporter activity	909	1	20452	2	0.00197333	0.00775164	11.2497	Ccrd_009752
GO:0000278	biological_process	mitotic cell cycle	909	2	20452	6	0.00158203	0.00775164	7.49982	Ccrd_006023;Ccrd_017348
GO:0043564	cellular_component	Ku70:Ku80 complex	909	1	20452	2	0.00197333	0.00775164	11.2497	Ccrd_006647
GO:0044212	molecular_function	transcription regulatory region DNA binding	909	1	20452	2	0.00197333	0.00775164	11.2497	Ccrd_014630
GO:0004817	molecular_function	cysteine-tRNA ligase activity	909	1	20452	2	0.00197333	0.00775164	11.2497	Ccrd_000277
GO:0030785	molecular_function	[ribulose-bisphosphate carboxylase]-lysine N-methyltransferase activity	909	1	20452	2	0.00197333	0.00775164	11.2497	Ccrd_001749
GO:0006979	biological_process	response to oxidative stress	909	13	20452	130	0.00194221	0.00775164	2.24994	Ccrd_024377;Ccrd_004478;Ccrd_012678;Ccrd_000488;Ccrd_005687;Ccrd_004297;Ccrd_025116;Ccrd_017982;Ccrd_022196;Ccrd_018836;Ccrd_019305;Ccrd_023159;Ccrd_018409
GO:0010218	biological_process	response to far red light	909	2	20452	6	0.00158203	0.00775164	7.49982	Ccrd_000309;Ccrd_000148
GO:0004781	molecular_function	sulfate adenylyltransferase (ATP) activity	909	1	20452	2	0.00197333	0.00775164	11.2497	Ccrd_004362
GO:0015145	molecular_function	monosaccharide transmembrane transporter activity	909	1	20452	2	0.00197333	0.00775164	11.2497	Ccrd_004709
GO:0004824	molecular_function	lysine-tRNA ligase activity	909	1	20452	2	0.00197333	0.00775164	11.2497	Ccrd_006552
GO:0004829	molecular_function	threonine-tRNA ligase activity	909	1	20452	2	0.00197333	0.00775164	11.2497	Ccrd_000095
GO:0009514	cellular_component	glyoxysome	909	1	20452	2	0.00197333	0.00775164	11.2497	Ccrd_017518
GO:0004673	molecular_function	protein histidine kinase activity	909	2	20452	6	0.00158203	0.00775164	7.49982	Ccrd_024678;Ccrd_025769
GO:0004057	molecular_function	arginyltransferase activity	909	1	20452	2	0.00197333	0.00775164	11.2497	Ccrd_016807
GO:0034256	molecular_function	chlorophyll(ide) b reductase activity	909	1	20452	2	0.00197333	0.00775164	11.2497	Ccrd_004041
GO:0005819	cellular_component	spindle	909	3	20452	13	0.00200837	0.0078092	5.19218	Ccrd_012545;Ccrd_006023;Ccrd_017348
GO:0030131	cellular_component	clathrin adaptor complex	909	3	20452	13	0.00200837	0.0078092	5.19218	Ccrd_006125;Ccrd_024666;Ccrd_013792
GO:0005694	cellular_component	chromosome	909	11	20452	105	0.0024199	0.00936185	2.35709	Ccrd_013818;Ccrd_013817;Ccrd_020958;Ccrd_019682;Ccrd_016616;Ccrd_018761;Ccrd_007457;Ccrd_013012;Ccrd_010917;Ccrd_018102;Ccrd_026469
GO:0016491	molecular_function	oxidoreductase activity	909	66	20452	1063	0.00249183	0.00959165	1.39696	Ccrd_015144;Ccrd_020534;Ccrd_008956;Ccrd_022496;Ccrd_000768;Ccrd_016816;Ccrd_011655;Ccrd_007848;Ccrd_007832;Ccrd_012072;Ccrd_024377;Ccrd_004478;Ccrd_024408;Ccrd_000264;Ccrd_023393;Ccrd_024577;Ccrd_002790;Ccrd_000515;Ccrd_012678;Ccrd_024672;Ccrd_006042;Ccrd_006310;Ccrd_016938;Ccrd_005687;Ccrd_017454;Ccrd_016940;Ccrd_016939;Ccrd_004297;Ccrd_015041;Ccrd_012823;Ccrd_016947;Ccrd_004750;Ccrd_010523;Ccr…
GO:0016925	biological_process	protein sumoylation	909	2	20452	7	0.00267719	0.0101021	6.42841	Ccrd_016687;Ccrd_016686
GO:0045087	biological_process	innate immune response	909	2	20452	7	0.00267719	0.0101021	6.42841	Ccrd_000565;Ccrd_000826
GO:0008152	biological_process	metabolic process	909	23	20452	290	0.00267298	0.0101021	1.78444	Ccrd_014374;Ccrd_015430;Ccrd_008943;Ccrd_016016;Ccrd_006945;Ccrd_002426;Ccrd_006561;Ccrd_006162;Ccrd_000418;Ccrd_022005;Ccrd_009555;Ccrd_007241;Ccrd_008017;Ccrd_007870;Ccrd_000217;Ccrd_011524;Ccrd_008006;Ccrd_011630;Ccrd_016349;Ccrd_021313;Ccrd_021312;Ccrd_018994;Ccrd_015984
GO:0004867	molecular_function	serine-type endopeptidase inhibitor activity	909	2	20452	7	0.00267719	0.0101021	6.42841	Ccrd_006668;Ccrd_013390
GO:0004601	molecular_function	peroxidase activity	909	12	20452	125	0.00375768	0.0141097	2.15995	Ccrd_024377;Ccrd_004478;Ccrd_012678;Ccrd_005687;Ccrd_004297;Ccrd_025116;Ccrd_017982;Ccrd_022196;Ccrd_018836;Ccrd_019305;Ccrd_023159;Ccrd_018409
GO:0010167	biological_process	response to nitrate	909	2	20452	8	0.00414246	0.0151824	5.62486	Ccrd_024681;Ccrd_015380
GO:0015706	biological_process	nitrate transport	909	2	20452	8	0.00414246	0.0151824	5.62486	Ccrd_024681;Ccrd_015380
GO:0009617	biological_process	response to bacterium	909	2	20452	8	0.00414246	0.0151824	5.62486	Ccrd_003877;Ccrd_000565
GO:0018216	biological_process	peptidyl-arginine methylation	909	2	20452	8	0.00414246	0.0151824	5.62486	Ccrd_006396;Ccrd_000466
GO:0007094	biological_process	mitotic spindle assembly checkpoint	909	2	20452	8	0.00414246	0.0151824	5.62486	Ccrd_016527;Ccrd_002250
GO:0007165	biological_process	signal transduction	909	13	20452	142	0.00437564	0.0159607	2.05981	Ccrd_008295;Ccrd_015575;Ccrd_013026;Ccrd_012601;Ccrd_012688;Ccrd_000602;Ccrd_014891;Ccrd_000564;Ccrd_017974;Ccrd_019124;Ccrd_025626;Ccrd_025769;Ccrd_005311
GO:0043565	molecular_function	sequence-specific DNA binding	909	19	20452	236	0.00446371	0.0162047	1.8114	Ccrd_013225;Ccrd_018331;Ccrd_006740;Ccrd_010981;Ccrd_022897;Ccrd_024709;Ccrd_000135;Ccrd_001935;Ccrd_002556;Ccrd_000565;Ccrd_017988;Ccrd_004046;Ccrd_022835;Ccrd_021845;Ccrd_000950;Ccrd_008690;Ccrd_001788;Ccrd_004773;Ccrd_001141
GO:0004061	molecular_function	arylformamidase activity	909	1	20452	3	0.00574494	0.018568	7.49982	Ccrd_026890
GO:0031461	cellular_component	cullin-RING ubiquitin ligase complex	909	1	20452	3	0.00574494	0.018568	7.49982	Ccrd_000517
GO:0032777	cellular_component	Piccolo NuA4 histone acetyltransferase complex	909	1	20452	3	0.00574494	0.018568	7.49982	Ccrd_000150
GO:0046524	molecular_function	sucrose-phosphate synthase activity	909	1	20452	3	0.00574494	0.018568	7.49982	Ccrd_022404
GO:0016756	molecular_function	glutathione gamma-glutamylcysteinyltransferase activity	909	1	20452	3	0.00574494	0.018568	7.49982	Ccrd_014849
GO:0030121	cellular_component	AP-1 adaptor complex	909	1	20452	3	0.00574494	0.018568	7.49982	Ccrd_000097
GO:0080123	molecular_function	jasmonate-amino synthetase activity	909	1	20452	3	0.00574494	0.018568	7.49982	Ccrd_006888
GO:0004825	molecular_function	methionine-tRNA ligase activity	909	1	20452	3	0.00574494	0.018568	7.49982	Ccrd_013373
GO:0004325	molecular_function	ferrochelatase activity	909	1	20452	3	0.00574494	0.018568	7.49982	Ccrd_006421
GO:0009986	cellular_component	cell surface	909	1	20452	3	0.00574494	0.018568	7.49982	Ccrd_015990
GO:0009360	cellular_component	DNA polymerase III complex	909	1	20452	3	0.00574494	0.018568	7.49982	Ccrd_001120
GO:0017056	molecular_function	structural constituent of nuclear pore	909	3	20452	17	0.00580133	0.0186715	3.97049	Ccrd_006220;Ccrd_025603;Ccrd_016203
GO:0016274	molecular_function	protein-arginine N-methyltransferase activity	909	2	20452	9	0.00600958	0.0187127	4.99988	Ccrd_006396;Ccrd_000466
GO:0019789	molecular_function	SUMO transferase activity	909	2	20452	9	0.00600958	0.0187127	4.99988	Ccrd_016687;Ccrd_016686
GO:0035246	biological_process	peptidyl-arginine N-methylation	909	2	20452	9	0.00600958	0.0187127	4.99988	Ccrd_006396;Ccrd_000466
GO:0010411	biological_process	xyloglucan metabolic process	909	2	20452	9	0.00600958	0.0187127	4.99988	Ccrd_000418;Ccrd_007241
GO:0052593	molecular_function	tryptamine:oxygen oxidoreductase (deaminating) activity	909	2	20452	9	0.00600958	0.0187127	4.99988	Ccrd_024672;Ccrd_006056
GO:0052594	molecular_function	aminoacetone:oxygen oxidoreductase(deaminating) activity	909	2	20452	9	0.00600958	0.0187127	4.99988	Ccrd_024672;Ccrd_006056
GO:0052595	molecular_function	aliphatic-amine oxidase activity	909	2	20452	9	0.00600958	0.0187127	4.99988	Ccrd_024672;Ccrd_006056
GO:0052596	molecular_function	phenethylamine:oxygen oxidoreductase (deaminating) activity	909	2	20452	9	0.00600958	0.0187127	4.99988	Ccrd_024672;Ccrd_006056
GO:0000981	molecular_function	RNA polymerase II transcription factor activity, sequence-specific DNA binding	909	5	20452	38	0.0061935	0.0192074	2.96045	Ccrd_006740;Ccrd_024709;Ccrd_000135;Ccrd_022835;Ccrd_000950
GO:0003712	molecular_function	transcription cofactor activity	909	5	20452	39	0.00705029	0.0216889	2.88454	Ccrd_000316;Ccrd_006389;Ccrd_006591;Ccrd_000224;Ccrd_026789
GO:0045893	biological_process	positive regulation of transcription, DNA-templated	909	5	20452	39	0.00705029	0.0216889	2.88454	Ccrd_000309;Ccrd_000148;Ccrd_001935;Ccrd_000565;Ccrd_023448
GO:0051321	biological_process	meiotic cell cycle	909	3	20452	18	0.00720013	0.0218861	3.74991	Ccrd_024407;Ccrd_000473;Ccrd_000477
GO:0003684	molecular_function	damaged DNA binding	909	3	20452	18	0.00720013	0.0218861	3.74991	Ccrd_000295;Ccrd_006647;Ccrd_025523
GO:0009627	biological_process	systemic acquired resistance	909	3	20452	18	0.00720013	0.0218861	3.74991	Ccrd_011188;Ccrd_004706;Ccrd_003745
GO:0071949	molecular_function	FAD binding	909	5	20452	40	0.00798961	0.0241899	2.81243	Ccrd_007972;Ccrd_012823;Ccrd_003971;Ccrd_003953;Ccrd_026838
GO:0008131	molecular_function	primary amine oxidase activity	909	2	20452	10	0.00830377	0.0247497	4.49989	Ccrd_024672;Ccrd_006056
GO:0016161	molecular_function	beta-amylase activity	909	2	20452	10	0.00830377	0.0247497	4.49989	Ccrd_006945;Ccrd_006561
GO:0009308	biological_process	amine metabolic process	909	2	20452	10	0.00830377	0.0247497	4.49989	Ccrd_024672;Ccrd_006056
GO:0005975	biological_process	carbohydrate metabolic process	909	31	20452	459	0.00827145	0.0247497	1.51957	Ccrd_014374;Ccrd_015430;Ccrd_008943;Ccrd_016016;Ccrd_006945;Ccrd_007832;Ccrd_002426;Ccrd_006561;Ccrd_006162;Ccrd_001400;Ccrd_000418;Ccrd_022005;Ccrd_009555;Ccrd_007241;Ccrd_008017;Ccrd_022560;Ccrd_001940;Ccrd_007013;Ccrd_007870;Ccrd_000217;Ccrd_011524;Ccrd_008006;Ccrd_019484;Ccrd_017282;Ccrd_016349;Ccrd_000755;Ccrd_021313;Ccrd_021312;Ccrd_012195;Ccrd_018994;Ccrd_015984
GO:0045490	biological_process	pectin catabolic process	909	7	20452	66	0.00867063	0.025743	2.38631	Ccrd_023925;Ccrd_013485;Ccrd_003877;Ccrd_006764;Ccrd_006765;Ccrd_006984;Ccrd_013141
GO:0000226	biological_process	microtubule cytoskeleton organization	909	3	20452	19	0.00880434	0.0259389	3.55254	Ccrd_006023;Ccrd_014448;Ccrd_022607
GO:0000079	biological_process	regulation of cyclin-dependent protein serine/threonine kinase activity	909	3	20452	19	0.00880434	0.0259389	3.55254	Ccrd_021208;Ccrd_011549;Ccrd_026870
GO:0006952	biological_process	defense response	909	20	20452	269	0.00909677	0.0265959	1.67282	Ccrd_003359;Ccrd_013329;Ccrd_000315;Ccrd_007203;Ccrd_021540;Ccrd_011849;Ccrd_007348;Ccrd_001425;Ccrd_005456;Ccrd_017404;Ccrd_010898;Ccrd_016332;Ccrd_003764;Ccrd_013540;Ccrd_004051;Ccrd_014630;Ccrd_014749;Ccrd_026362;Ccrd_016849;Ccrd_023800
GO:0098869	biological_process	cellular oxidant detoxification	909	12	20452	139	0.00909134	0.0265959	1.9424	Ccrd_024377;Ccrd_004478;Ccrd_012678;Ccrd_005687;Ccrd_004297;Ccrd_025116;Ccrd_017982;Ccrd_022196;Ccrd_018836;Ccrd_019305;Ccrd_023159;Ccrd_018409
GO:0015276	molecular_function	ligand-gated ion channel activity	909	4	20452	30	0.00969168	0.0280145	2.99993	Ccrd_024232;Ccrd_005061;Ccrd_004853;Ccrd_008510
GO:0016717	molecular_function	oxidoreductase activity, acting on paired donors, with oxidation of a pair of donors resulting in the reduction of molecular oxygen to two molecules of water	909	4	20452	30	0.00969168	0.0280145	2.99993	Ccrd_009539;Ccrd_018182;Ccrd_002831;Ccrd_002830
GO:0004970	molecular_function	ionotropic glutamate receptor activity	909	4	20452	30	0.00969168	0.0280145	2.99993	Ccrd_024232;Ccrd_005061;Ccrd_004853;Ccrd_008510
GO:0015696	biological_process	ammonium transport	909	2	20452	11	0.0110444	0.0281914	4.09081	Ccrd_025683;Ccrd_025684
GO:0008792	molecular_function	arginine decarboxylase activity	909	1	20452	4	0.0111514	0.0281914	5.62486	Ccrd_024170
GO:0006527	biological_process	arginine catabolic process	909	1	20452	4	0.0111514	0.0281914	5.62486	Ccrd_024170
GO:0010114	biological_process	response to red light	909	1	20452	4	0.0111514	0.0281914	5.62486	Ccrd_000309
GO:1903506	biological_process	regulation of nucleic acid-templated transcription	909	1	20452	4	0.0111514	0.0281914	5.62486	Ccrd_026789
GO:0016151	molecular_function	nickel cation binding	909	1	20452	4	0.0111514	0.0281914	5.62486	Ccrd_000056
GO:0046938	biological_process	phytochelatin biosynthetic process	909	1	20452	4	0.0111514	0.0281914	5.62486	Ccrd_014849
GO:0010277	molecular_function	chlorophyllide a oxygenase [overall] activity	909	1	20452	4	0.0111514	0.0281914	5.62486	Ccrd_002826
GO:0008373	molecular_function	sialyltransferase activity	909	1	20452	4	0.0111514	0.0281914	5.62486	Ccrd_007307
GO:0008026	molecular_function	ATP-dependent helicase activity	909	1	20452	4	0.0111514	0.0281914	5.62486	Ccrd_000062
GO:0009911	biological_process	positive regulation of flower development	909	1	20452	4	0.0111514	0.0281914	5.62486	Ccrd_000309
GO:0097503	biological_process	sialylation	909	1	20452	4	0.0111514	0.0281914	5.62486	Ccrd_007307
GO:0046168	biological_process	glycerol-3-phosphate catabolic process	909	1	20452	4	0.0111514	0.0281914	5.62486	Ccrd_002989
GO:0009414	biological_process	response to water deprivation	909	4	20452	31	0.0111421	0.0281914	2.90315	Ccrd_000360;Ccrd_000488;Ccrd_018761;Ccrd_025769
GO:0072488	biological_process	ammonium transmembrane transport	909	2	20452	11	0.0110444	0.0281914	4.09081	Ccrd_025683;Ccrd_025684
GO:0005345	molecular_function	purine nucleobase transmembrane transporter activity	909	1	20452	4	0.0111514	0.0281914	5.62486	Ccrd_014591
GO:0016471	cellular_component	vacuolar proton-transporting V-type ATPase complex	909	1	20452	4	0.0111514	0.0281914	5.62486	Ccrd_016720
GO:0038199	molecular_function	ethylene receptor activity	909	1	20452	4	0.0111514	0.0281914	5.62486	Ccrd_008295
GO:0004739	molecular_function	pyruvate dehydrogenase (acetyl-transferring) activity	909	2	20452	11	0.0110444	0.0281914	4.09081	Ccrd_000515;Ccrd_000019
GO:0019441	biological_process	tryptophan catabolic process to kynurenine	909	1	20452	4	0.0111514	0.0281914	5.62486	Ccrd_026890
GO:0031593	molecular_function	polyubiquitin binding	909	1	20452	4	0.0111514	0.0281914	5.62486	Ccrd_000295
GO:0009585	biological_process	red, far-red light phototransduction	909	1	20452	4	0.0111514	0.0281914	5.62486	Ccrd_000309
GO:0006086	biological_process	acetyl-CoA biosynthetic process from pyruvate	909	2	20452	11	0.0110444	0.0281914	4.09081	Ccrd_000515;Ccrd_000019
GO:0000786	cellular_component	nucleosome	909	8	20452	82	0.0104723	0.0281914	2.19507	Ccrd_013818;Ccrd_013817;Ccrd_020958;Ccrd_016616;Ccrd_018761;Ccrd_007457;Ccrd_018102;Ccrd_026469
GO:0004930	molecular_function	G-protein coupled receptor activity	909	1	20452	4	0.0111514	0.0281914	5.62486	Ccrd_024232
GO:0007166	biological_process	cell surface receptor signaling pathway	909	1	20452	4	0.0111514	0.0281914	5.62486	Ccrd_011677
GO:0009704	biological_process	de-etiolation	909	1	20452	4	0.0111514	0.0281914	5.62486	Ccrd_000360
GO:0051740	molecular_function	ethylene binding	909	1	20452	4	0.0111514	0.0281914	5.62486	Ccrd_008295
GO:0005986	biological_process	sucrose biosynthetic process	909	1	20452	4	0.0111514	0.0281914	5.62486	Ccrd_022404
GO:0005672	cellular_component	transcription factor TFIIA complex	909	1	20452	4	0.0111514	0.0281914	5.62486	Ccrd_003287
GO:0008519	molecular_function	ammonium transmembrane transporter activity	909	2	20452	11	0.0110444	0.0281914	4.09081	Ccrd_025683;Ccrd_025684
GO:0009864	biological_process	induced systemic resistance, jasmonic acid mediated signaling pathway	909	1	20452	4	0.0111514	0.0281914	5.62486	Ccrd_006888
GO:0000712	biological_process	resolution of meiotic recombination intermediates	909	1	20452	4	0.0111514	0.0281914	5.62486	Ccrd_000477
GO:0061025	biological_process	membrane fusion	909	3	20452	20	0.010625	0.0281914	3.37492	Ccrd_021715;Ccrd_013335;Ccrd_000163
GO:0004675	molecular_function	transmembrane receptor protein serine/threonine kinase activity	909	1	20452	4	0.0111514	0.0281914	5.62486	Ccrd_013026
GO:0005484	molecular_function	SNAP receptor activity	909	3	20452	20	0.010625	0.0281914	3.37492	Ccrd_021715;Ccrd_013335;Ccrd_000163
GO:0004367	molecular_function	glycerol-3-phosphate dehydrogenase [NAD+] activity	909	1	20452	4	0.0111514	0.0281914	5.62486	Ccrd_002989
GO:0030259	biological_process	lipid glycosylation	909	1	20452	4	0.0111514	0.0281914	5.62486	Ccrd_017282
GO:0042545	biological_process	cell wall modification	909	5	20452	44	0.0126545	0.0316181	2.55676	Ccrd_023925;Ccrd_003877;Ccrd_006764;Ccrd_006765;Ccrd_013141
GO:0045330	molecular_function	aspartyl esterase activity	909	5	20452	44	0.0126545	0.0316181	2.55676	Ccrd_023925;Ccrd_003877;Ccrd_006764;Ccrd_006765;Ccrd_013141
GO:0030599	molecular_function	pectinesterase activity	909	5	20452	44	0.0126545	0.0316181	2.55676	Ccrd_023925;Ccrd_003877;Ccrd_006764;Ccrd_006765;Ccrd_013141
GO:0005200	molecular_function	structural constituent of cytoskeleton	909	3	20452	21	0.012672	0.0316181	3.21421	Ccrd_021489;Ccrd_007902;Ccrd_007908
GO:0007186	biological_process	G-protein coupled receptor signaling pathway	909	2	20452	12	0.0142456	0.034863	3.74991	Ccrd_024232;Ccrd_012601
GO:0006535	biological_process	cysteine biosynthetic process from serine	909	2	20452	12	0.0142456	0.034863	3.74991	Ccrd_008931;Ccrd_015127
GO:0048511	biological_process	rhythmic process	909	2	20452	12	0.0142456	0.034863	3.74991	Ccrd_016696;Ccrd_022914
GO:0006357	biological_process	regulation of transcription from RNA polymerase II promoter	909	8	20452	86	0.0140635	0.034863	2.09297	Ccrd_006740;Ccrd_000316;Ccrd_006389;Ccrd_024709;Ccrd_000135;Ccrd_000150;Ccrd_022835;Ccrd_000950
GO:0006479	biological_process	protein methylation	909	2	20452	12	0.0142456	0.034863	3.74991	Ccrd_006396;Ccrd_000466
GO:0032875	biological_process	regulation of DNA endoreduplication	909	2	20452	12	0.0142456	0.034863	3.74991	Ccrd_024669;Ccrd_012448
GO:0048038	molecular_function	quinone binding	909	3	20452	22	0.0149544	0.0364812	3.06811	Ccrd_024672;Ccrd_024678;Ccrd_006056
GO:0010038	biological_process	response to metal ion	909	1	20452	5	0.0180403	0.0412504	4.49989	Ccrd_014849
GO:0006561	biological_process	proline biosynthetic process	909	1	20452	5	0.0180403	0.0412504	4.49989	Ccrd_000488
GO:0008878	molecular_function	glucose-1-phosphate adenylyltransferase activity	909	1	20452	5	0.0180403	0.0412504	4.49989	Ccrd_011014
GO:0000103	biological_process	sulfate assimilation	909	1	20452	5	0.0180403	0.0412504	4.49989	Ccrd_004362
GO:0016810	molecular_function	hydrolase activity, acting on carbon-nitrogen (but not peptide) bonds	909	1	20452	5	0.0180403	0.0412504	4.49989	Ccrd_000056
GO:0030261	biological_process	chromosome condensation	909	1	20452	5	0.0180403	0.0412504	4.49989	Ccrd_013012
GO:0009331	cellular_component	glycerol-3-phosphate dehydrogenase complex	909	1	20452	5	0.0180403	0.0412504	4.49989	Ccrd_002989
GO:0032580	cellular_component	Golgi cisterna membrane	909	1	20452	5	0.0180403	0.0412504	4.49989	Ccrd_021743
GO:0009926	biological_process	auxin polar transport	909	1	20452	5	0.0180403	0.0412504	4.49989	Ccrd_009752
GO:0009739	biological_process	response to gibberellin	909	1	20452	5	0.0180403	0.0412504	4.49989	Ccrd_020899
GO:0006004	biological_process	fucose metabolic process	909	5	20452	47	0.0172159	0.0412504	2.39356	Ccrd_006024;Ccrd_005058;Ccrd_000159;Ccrd_000238;Ccrd_014432
GO:0043067	biological_process	regulation of programmed cell death	909	1	20452	5	0.0180403	0.0412504	4.49989	Ccrd_014895
GO:0019210	molecular_function	kinase inhibitor activity	909	1	20452	5	0.0180403	0.0412504	4.49989	Ccrd_004373
GO:0009933	biological_process	meristem structural organization	909	1	20452	5	0.0180403	0.0412504	4.49989	Ccrd_008056
GO:0009620	biological_process	response to fungus	909	1	20452	5	0.0180403	0.0412504	4.49989	Ccrd_024412
GO:0033673	biological_process	negative regulation of kinase activity	909	1	20452	5	0.0180403	0.0412504	4.49989	Ccrd_004373
GO:0015996	biological_process	chlorophyll catabolic process	909	1	20452	5	0.0180403	0.0412504	4.49989	Ccrd_004041
GO:0009741	biological_process	response to brassinosteroid	909	1	20452	5	0.0180403	0.0412504	4.49989	Ccrd_000488
GO:0009786	biological_process	regulation of asymmetric cell division	909	1	20452	5	0.0180403	0.0412504	4.49989	Ccrd_015990
GO:0055129	biological_process	L-proline biosynthetic process	909	1	20452	5	0.0180403	0.0412504	4.49989	Ccrd_000488
GO:0046658	cellular_component	anchored component of plasma membrane	909	1	20452	5	0.0180403	0.0412504	4.49989	Ccrd_026375
GO:0048544	biological_process	recognition of pollen	909	6	20452	61	0.0181398	0.0413544	2.21306	Ccrd_014935;Ccrd_000941;Ccrd_011164;Ccrd_022264;Ccrd_003076;Ccrd_016676
GO:0000272	biological_process	polysaccharide catabolic process	909	4	20452	35	0.0184103	0.0418465	2.57137	Ccrd_006945;Ccrd_006561;Ccrd_006162;Ccrd_000217
GO:0003677	molecular_function	DNA binding	909	82	20452	1488	0.0185877	0.0421248	1.23989	Ccrd_013818;Ccrd_013817;Ccrd_003359;Ccrd_006740;Ccrd_013329;Ccrd_013325;Ccrd_020958;Ccrd_000090;Ccrd_000029;Ccrd_000039;Ccrd_000315;Ccrd_000312;Ccrd_000309;Ccrd_008283;Ccrd_003991;Ccrd_012382;Ccrd_022897;Ccrd_024709;Ccrd_008056;Ccrd_000392;Ccrd_014789;Ccrd_006647;Ccrd_011849;Ccrd_002749;Ccrd_007740;Ccrd_002250;Ccrd_016616;Ccrd_000135;Ccrd_005456;Ccrd_012835;Ccrd_000369;Ccrd_004739;Ccrd_006521;Ccr…
GO:0008289	molecular_function	lipid binding	909	8	20452	91	0.0197415	0.0446076	1.97797	Ccrd_007839;Ccrd_024688;Ccrd_024709;Ccrd_019585;Ccrd_002421;Ccrd_000953;Ccrd_016948;Ccrd_012171
GO:0006355	biological_process	regulation of transcription, DNA-templated	909	62	20452	1091	0.0200385	0.0451457	1.27861	Ccrd_013226;Ccrd_013225;Ccrd_004144;Ccrd_003359;Ccrd_014976;Ccrd_006740;Ccrd_003597;Ccrd_003598;Ccrd_013329;Ccrd_012099;Ccrd_011129;Ccrd_000315;Ccrd_006355;Ccrd_003991;Ccrd_010981;Ccrd_022897;Ccrd_000529;Ccrd_024709;Ccrd_011849;Ccrd_007740;Ccrd_000135;Ccrd_000113;Ccrd_000138;Ccrd_000148;Ccrd_005456;Ccrd_024984;Ccrd_006776;Ccrd_007702;Ccrd_000369;Ccrd_022541;Ccrd_022533;Ccrd_017404;Ccrd_016332;Ccr…
GO:0005643	cellular_component	nuclear pore	909	3	20452	24	0.0202561	0.045369	2.81243	Ccrd_006220;Ccrd_025603;Ccrd_016203
GO:0006913	biological_process	nucleocytoplasmic transport	909	3	20452	24	0.0202561	0.045369	2.81243	Ccrd_006220;Ccrd_025603;Ccrd_016203
GO:0005886	cellular_component	plasma membrane	909	33	20452	531	0.0214983	0.0480107	1.39827	Ccrd_015424;Ccrd_011461;Ccrd_011425;Ccrd_006931;Ccrd_006146;Ccrd_014524;Ccrd_024685;Ccrd_013026;Ccrd_006102;Ccrd_016576;Ccrd_015380;Ccrd_021089;Ccrd_000163;Ccrd_016755;Ccrd_004709;Ccrd_008164;Ccrd_008165;Ccrd_019869;Ccrd_000567;Ccrd_016854;Ccrd_003512;Ccrd_015990;Ccrd_016203;Ccrd_003690;Ccrd_013352;Ccrd_021684;Ccrd_004373;Ccrd_026415;Ccrd_004760;Ccrd_021973;Ccrd_012288;Ccrd_016846;Ccrd_018380
